# Supplementary material for: Cold stress induces rapid gene-specific changes in the levels of H3K4me3 and H3K27me3 in Arabidopsis thaliana
Source: Front Plant Sci. 2024 Apr 15;15:1390144. doi: 10.3389/fpls.2024.1390144 (PMC11056581; doi:10.3389/fpls.2024.1390144)
Supplement: Supplementary file 2 [file Table_1.xlsx]

## Sheet: Genotyping
Primer Name	Locus	Primer Sequence (5' - 3')	Source
clf28-LP	AT2G23380	GAAGGGAGCTCTCTGCTTGAT	T-DNA Primer 2
clf28-RP		CTGCCAGTTCAGGAATGGTT
SALK_LB	SALK T-DNA	TTGGGTGATGGTTCACGTAGTGGG	T-DNA Primer 2

## Sheet: ChIP
Primer Name	Locus	Primer Sequence (5' - 3')	Source
COR15A_ChIP_FOR	AT2G42540	CCGAGTTTCTGTTCGTTCTTT	Ding et al., 2012
COR15A_ChIP_REV		CAATTTCATGGCCGACCT
FLC_ChIP_FOR	AT5G10140	CTGTTCTCTGTGACGCATCC	Primer3
FLC_ChIP_REV		AGGGGGAACAAATGAAAACC
GOLS3_ChIP_FOR	AT1G09350	TTCTCGGACAAGATGGCACC	Primer3
GOLS3_ChIP_REV		GCCAGACCAACCACTCCTTT
LTI30_ChIP_FOR	AT3G50970	CTGGTACCGGTGGTGTTCA	Primer3
LTI30_ChIP_REV		ACCAGTGTTAGTAGTACCATAAGTT
WRKY40_ChIP_FOR	AT1G80840	CCCTCCCAAGAAACGCAAATC	Primer3
WRKY40_ChIP_REV		CCGACACTCCGCCAATAACC

## Sheet: RTqPCR
Primer Name	Locus	Primer Sequence (5' - 3')	Source
ACTIN2_RT_FOR	AT3G18780	CTTGAAGTATCCTATTGAGCATG	Vyse et al., 2020
ACTIN2_RT_REV		CTCGTAGATTGGCACAGTGTGAG
COR15A_RT_FOR	AT2G42540	AGCTGTTCTCACTGGTATGG	Vyse et al., 2020
COR15A_RT_REV		GAAGCTTTCTTTGTGGCCTC
FLC_RT_FOR	AT5G10140	TTCAACTGGAGGAACACCTTGA	Primer3
FLC_RT_REV		CATGAGTTCGGTCTTCTTGGC
GOLS3_RT_FOR	AT1G09350	ACAGGCCAAGAAGGAAATATGG	Nishizawa et al., 2008
GOLS3_RT_REV		GATGGAGCTTTGGCACATTG
LTI30_RT_FOR	AT3G50970	TCCCGGTGGTCATCACTAGA	Primer3
LTI30_RT_REV		AGCGACTCAATGAAAGAAAGCC
PDF_RT_FOR	AT1G13320	TAACGTGGCCAAAATGATGC	Vyse et al., 2020
PDF_RT_REV		GTTCTCCACAACCGCTTGGT
TIP41_RT_FOR	AT4G34270	GTGAAAACTGTTGGAGAGAAGCAA	Vyse et al., 2020
TIP41_RT_REV		TCAACTGGATACCCTTTCGCA
WRKY40_RT_FOR	AT1G80840	ACATCCACAAGAACCCATATCGAAG	Primer3
WRKY40_RT_REV		ACCAAAGCACTTGTCGGTGGA
