# Supplementary material for: Cold stress induces rapid gene-specific changes in the levels of H3K4me3 and H3K27me3 in Arabidopsis thaliana
Source: Front Plant Sci. 2024 Apr 15;15:1390144. doi: 10.3389/fpls.2024.1390144 (PMC11056581; doi:10.3389/fpls.2024.1390144)
Supplement: Supplementary file 3 [file Table_2.xlsx]

## Sheet: K4_3h_Gain
Supplementary Table 3
(A) Genes gaining H3K4me3 after 3h of cold exposure
Gene	log2FCNvs3h	log2FCNvs3d	Name
AT1G01020	0.707579	0.573353	ARV1
AT1G01060	1.02749	0.736783	LHY
AT1G01170	0.706129	0.656828
AT1G01180	0.602338	-0.221043
AT1G01210	0.647631	0.144543
AT1G01320	0.503143	0.391774	REC1
AT1G01340	0.693283	0.167403	CNGC10
AT1G01520	0.953983	1.21106	ASG4
AT1G01610	0.773035	-0.145412	GPAT4
AT1G01620	0.753431	-0.167318	PIP1C
AT1G01650	0.673795	0.321523	SPPL4
AT1G01720	0.548153	0.0389992	ATAF1
AT1G01760	0.721384	0.173447	TAD1
AT1G01770	0.627382	-0.212772
AT1G01860	0.505407	-0.0559731	PFC1
AT1G01910	0.56202	0.121048	GET3A
AT1G01920	0.77486	0.240643
AT1G02010	0.914097	0.283486	SEC1A
AT1G02100	0.686514	0.158696	SBI1
AT1G02120	0.549173	0.173727	VAD1
AT1G02145	0.71467	0.108904	ALG12
AT1G02290	0.814456	0.167088
AT1G02305	0.632581	0.432042	ATCATHB2
AT1G02360	1.20825	0.0419975
AT1G02610	0.753654	1.34551
AT1G02640	0.98077	0.432862	BXL2
AT1G02690	0.83836	0.259573	IMPA-6
AT1G02780	0.6273	0.213796	emb2386
AT1G02850	1.02695	-0.0965502	BGLU11
AT1G02970	0.6759	0.0895401	WEE1
AT1G02990	1.18647	0.515504
AT1G03090	0.723159	0.0500747	MCCA
AT1G03250	0.559113	0.265131
AT1G03470	0.587853	-0.108491	NET3A
AT1G03475	0.698339	0.0174001	LIN2
AT1G03520	0.903362	0.366348
AT1G03590	0.762241	0.256389
AT1G03610	0.670562	0.567553
AT1G03650	0.553032	0.290928
AT1G03750	0.605134	0.0999304	SWI2
AT1G03800	0.650154	-0.238924	ERF10
AT1G03870	0.819317	0.0369063	FLA9
AT1G03950	0.892587	0.50961	VPS2.3
AT1G04140	0.548422	0.13968
AT1G04190	0.588065	0.510331	TPR3
AT1G04230	1.19309	0.430681
AT1G04280	0.580144	0.40678	NADKC
AT1G04350	0.658195	0.156435
AT1G04480	0.771203	0.0981204
AT1G04570	2.36764	2.07739
AT1G04590	0.723706	0.300702
AT1G04830	0.540063	0.0721517
AT1G04860	0.504824	0.569065	UBP2
AT1G04950	0.728838	-0.153718	TAFII59
AT1G05000	0.623273	0.447054	PFA-DSP1
AT1G05010	0.576092	0.212013	EFE
AT1G05120	0.680244	0.195528
AT1G05135	0.556608	-0.190366
AT1G05190	0.557443	0.429319	emb2394
AT1G05230	1.39107	0.238787	HDG2
AT1G05380	0.588972	-0.043732
AT1G05385	0.506785	0.536244	LPA19
AT1G05410	0.632775	0.180773
AT1G05575	0.642035	0.344245	HUP17
AT1G05675	1.45201	0.434721
AT1G05690	0.760946	0.431741	bt3
AT1G05785	0.737782	0.660548
AT1G05805	0.672455	0.42102	AKS2
AT1G05810	0.894856	-0.135265	RABA5E
AT1G05900	0.720632	0.174927	NTH2
AT1G06070	0.781238	0.386309	BZIP69
AT1G06130	1.35578	0.466239	GLX2-4
AT1G06180	0.906026	1.34698	MYB13
AT1G06200	1.0427	0.401963
AT1G06370	1.08031	0.283383
AT1G06400	1.10055	0.393944	ARA-2
AT1G06430	0.940232	0.811382	ftsh8
AT1G06470	0.595582	0.281413
AT1G06645	0.636288	-0.113782
AT1G06670	0.611681	0.0358977	NIH
AT1G06690	0.656933	0.415839
AT1G06760	0.767213	-0.631845	H1.1
AT1G06870	0.53119	-0.281819	PLSP2A
AT1G07050	1.30563	2.18486	FITNESS
AT1G07110	0.924303	0.249293	F2KP
AT1G07119	0.562342	-0.0171133
AT1G07160	0.795431	0.162475
AT1G07180	0.69372	-0.0356312	NDA1
AT1G07220	0.547928	0.271311
AT1G07250	0.557351	0.0466611	UGT71C4
AT1G07320	0.51494	-0.0519949	RPL4
AT1G07420	0.76867	0.451939	SMO2-1
AT1G07470	0.558434	0.202485
AT1G07700	1.20374	0.0529909
AT1G07740	0.70776	0.102281
AT1G07750	1.01342	0.120761
AT1G07810	0.507596	0.354798	ECA1
AT1G07950	0.502468	0.0502277	MED22B
AT1G07970	0.532227	-0.0271317	PNET1
AT1G08230	0.642349	0.343618
AT1G08360	0.660212	0.574854
AT1G08400	0.632784	-0.028822
AT1G08450	0.516714	0.271331	CRT3
AT1G08470	0.687741	0.0324414	SSL3
AT1G08480	0.741161	0.0814805	SDH6
AT1G08510	0.813167	0.177751	FATB
AT1G08530	0.553161	-0.130506
AT1G08750	0.925823	0.263486	GPI8
AT1G08810	0.649272	0.588859	MYB60
AT1G08830	0.762283	0.468193	CSD1
AT1G08930	0.681408	0.451906	ERD6
AT1G08980	0.810579	0.303132	AMI1
AT1G09000	0.762427	-0.466456	NP1
AT1G09010	1.05617	0.268782
AT1G09070	0.624796	-0.264595	SRC2
AT1G09150	0.686951	0.417538
AT1G09160	0.565001	0.0974974
AT1G09250	0.96488	0.0553191	AIF4
AT1G09310	0.619536	-0.787122
AT1G09330	0.67051	0.175297	ECH
AT1G09390	1.08176	-1.4497
AT1G09415	1.08115	0.306776	NIMIN-3
AT1G09630	0.596354	0.412339	RAB11c
AT1G09730	0.530335	0.15195	ASP1
AT1G09810	0.63047	0.207508	ECT11
AT1G10240	0.856013	0.187502	FRS11
AT1G10370	0.919402	0.478253	ERD9
AT1G10500	0.520366	0.316251	CPISCA
AT1G10570	0.711774	0.287748	OTS2
AT1G10590	0.589717	0.277646
AT1G10760	0.671997	0.98478	SEX1
AT1G10840	0.556789	0.112538	TIF3H1
AT1G10910	0.720508	0.349462	EMB3103
AT1G10920	1.18943	0.284409	LOV1
AT1G10960	0.650182	-0.082111	FD1
AT1G11150	0.688539	0.0308241
AT1G11175	0.579323	0.269458
AT1G11180	0.717049	-0.0789706	SCAMP2
AT1G11210	1.39142	1.47858
AT1G11260	1.16191	0.675517	STP1
AT1G11380	1.1332	0.400617
AT1G11475	0.63527	0.591036	NRPB10
AT1G11670	0.565786	0.563729
AT1G11680	0.550198	0.449169	CYP51G1
AT1G11720	0.554472	0.0422044	SS3
AT1G11860	0.723236	-0.0860862
AT1G11940	0.5443	-0.312803
AT1G12020	0.614705	0.0123948
AT1G12090	0.653755	0.168925	ELP
AT1G12230	0.615651	0.295701	GSM2-LIKE
AT1G12240	0.621874	0.406771	ATBETAFRUCT4
AT1G12310	0.54041	0.0603711
AT1G12320	0.503968	0.269268
AT1G12760	0.89391	-0.0535775
AT1G12770	0.78611	0.369859	EMB1586
AT1G13060	0.743528	0.489793	PBE1
AT1G13120	0.510869	0.281043	GLE1
AT1G13145	0.559193	0.181498
AT1G13180	0.54032	-0.234056	DIS1
AT1G13190	0.832395	0.565323
AT1G13245	0.991847	0.881506	RTFL17
AT1G13340	0.716912	-0.346695	ISTL6
AT1G13380	0.793519	0.114395
AT1G13460	0.50419	0.517647
AT1G13580	0.969369	0.46457	LAG13
AT1G13640	0.536936	0.524692
AT1G13670	1.47429	0.935909	BGL2
AT1G13700	1.0705	0.594293	PGL1
AT1G14000	0.64608	0.162615	VIK
AT1G14070	0.853137	-0.220011	FUT7
AT1G14260	2.17607	0.284071
AT1G14270	0.666439	0.448223
AT1G14370	0.552771	0.135213	APK2A
AT1G14380	0.731417	0.237333	IQD28
AT1G14450	0.759423	0.291771
AT1G14470	0.648693	-0.0396861
AT1G14510	0.818755	0.340549	AL7
AT1G14530	1.08563	0.442224	THH1
AT1G14830	0.555314	0.0196391	DL1C
AT1G14860	0.668476	0.21549	NUDT18
AT1G14890	1.11281	-0.169349
AT1G15020	0.695093	0.14851	QSOX1
AT1G15030	0.645898	-0.121869
AT1G15040	0.641767	0.252669	GAT1_2.1
AT1G15060	0.610253	-0.0501704
AT1G15125	0.796805	-0.830224
AT1G15165	0.703811	-0.154834
AT1G15200	0.673153	-0.0245734
AT1G15280	0.86857	0.117944	BTZ2
AT1G15310	0.781274	-0.385736	ATHSRP54A
AT1G15370	0.693011	0.51382	LOLITA
AT1G15410	0.669152	-0.108618
AT1G15430	0.565906	0.232597
AT1G15570	0.760753	-0.155178	CYCA2;3
AT1G15670	0.561225	-0.124117	KMD2
AT1G15710	0.685839	-0.0712852
AT1G15740	0.629413	0.303011
AT1G15750	0.97313	0.583459	TPL
AT1G15800	0.651875	0.120413
AT1G15820	0.82581	-0.318572	LHCB6
AT1G15825	1.15341	-0.647823
AT1G15890	0.729961	-0.209668
AT1G16040	0.669537	0.0226728
AT1G16250	0.622229	0.302123
AT1G16445	0.622266	0.478468
AT1G16560	1.14995	0.534598
AT1G16670	0.792755	0.351714	CRPK1
AT1G16710	0.587011	-0.0422598	HAC12
AT1G17110	0.694791	0.42009	UBP15
AT1G17140	0.503157	-0.302657	ICR1
AT1G17145	0.705207	0.581888
AT1G17147	0.554619	-0.315906
AT1G17240	0.718796	-0.309659	RLP2
AT1G17270	1.03316	0.0264603
AT1G17290	0.62681	0.198648	AlaAT1
AT1G17370	0.513001	0.4108	UBP1B
AT1G17460	0.6515	-0.281556	TRFL3
AT1G17470	0.674623	0.633202	DRG1
AT1G17510	1.02648	0.111955
AT1G17520	0.788693	0.15115
AT1G17720	0.546048	0.415763	ATB BETA
AT1G17970	0.602427	0.0151913	CTL15
AT1G18170	1.14343	-0.0645929
AT1G18180	3.13817	0.264797
AT1G18190	0.594349	0.0836826	GC2
AT1G18350	0.945151	-0.373163	MKK7
AT1G18540	0.654593	0.356577
AT1G18570	0.616941	0.0223104	MYB51
AT1G18610	0.746345	0.169351
AT1G18630	1.07784	0.338981	RBGA1
AT1G18650	0.696392	-0.257525	PDCB3
AT1G18700	0.852402	0.41668
AT1G18740	1.15921	0.0813537	B1L
AT1G18810	0.538797	0.324828
AT1G19000	0.508079	0.0605786
AT1G19010	0.536284	0.363958
AT1G19080	0.772972	0.431946	TTN10
AT1G19130	1.19625	0.169837
AT1G19180	0.728252	0.895164	JAZ1
AT1G19300	0.712107	-0.565816	PARVUS
AT1G19485	0.536976	0.154161
AT1G19490	0.803996	0.465956	BZIP62
AT1G19660	0.795856	-0.10702	BBD2
AT1G19700	0.543252	0.031748	BEL10
AT1G19730	0.551414	0.333137	ATTRX4
AT1G19800	0.62401	0.191982	ABCI14
AT1G19880	0.580117	0.253567
AT1G19910	0.638125	0.0900469	AVA-P2
AT1G19920	0.897826	0.215249	APS2
AT1G20030	0.72245	-0.00937905
AT1G20050	0.534533	0.0301503	HYD1
AT1G20090	0.915206	0.305279	ROP2
AT1G20200	0.650974	0.238234	emb2719
AT1G20220	0.524196	0.232337	ATALBA2
AT1G20260	0.870553	0.358117	VAB3
AT1G20270	0.61353	0.310589
AT1G20330	0.611101	0.0552492	SMT2
AT1G20340	0.537283	0.0492173	DRT112
AT1G20350	0.684906	-1.10306	TIM17-1
AT1G20580	0.992059	0.207143
AT1G20630	1.24225	0.360876	CAT1
AT1G20810	0.869273	0.134231
AT1G20816	1.45612	0.425997
AT1G20890	1.19395	0.294877
AT1G21050	0.538935	0.0711427
AT1G21060	1.02566	0.2955
AT1G21090	0.601583	-0.0156433
AT1G21110	0.950388	0.232942	IGMT3
AT1G21260	0.777241	-0.0648338
AT1G21280	0.827763	-0.175242
AT1G21326	0.705067	-0.172177
AT1G21350	0.658141	-0.0328868
AT1G21380	0.62424	0.448254	TOL3
AT1G21390	0.632418	0.231981	emb2170
AT1G21400	0.51435	0.532082
AT1G21450	0.88374	0.598395	SCL1
AT1G21460	0.685127	0.273498	SWEET1
AT1G21560	0.977567	-0.126758
AT1G21640	0.517737	-0.0129557	NADK2
AT1G21670	0.659623	0.264019
AT1G21710	1.31356	-0.00290098	OGG1
AT1G21720	0.523541	0.0860382	PBC1
AT1G21790	0.762677	0.368895
AT1G21900	0.565861	0.321542	P24DELTA5
AT1G21910	1.12539	0.184245	DREB26
AT1G22110	0.73495	0.089196
AT1G22190	1.21561	0.413044	RAP2.4
AT1G22230	0.750943	-0.115337
AT1G22380	0.584428	-0.748279	UGT85A3
AT1G22500	0.976597	-0.507526	ATL15
AT1G22530	0.546286	0.200607	PATL2
AT1G23020	0.595342	0.114122	FRO3
AT1G23030	0.545553	0.192264	PUB11
AT1G23090	0.547918	0.192686	SULTR3;3
AT1G23280	0.686411	0.0164538
AT1G23360	0.52134	0.278429	MENG
AT1G23740	0.624188	-0.439534	AOR
AT1G23750	0.64366	0.160943
AT1G23820	0.986145	0.253967	SPDS1
AT1G23830	0.854428	0.155821
AT1G23860	0.717259	0.155467	RSZ21
AT1G23870	0.635692	0.567911	TPS9
AT1G23880	0.734757	0.342047
AT1G23890	0.626683	-0.0184961
AT1G24160	1.26517	0.406464
AT1G24265	0.565393	0.0956351
AT1G25350	0.548644	0.233101	OVA9
AT1G25390	0.515505	0.0281769	LRK10L4
AT1G25450	0.580703	-0.742562	KCS5
AT1G25520	0.560317	0.207107	PML4
AT1G25560	0.512206	0.386794	TEM1
AT1G26340	1.10479	0.420754	CB5-A
AT1G26370	0.776209	0.249875	RID1
AT1G26440	0.851231	0.0319416	UPS5
AT1G26550	0.674825	0.449299
AT1G26650	0.749421	0.0789231
AT1G26790	1.39121	1.97093	CDF6
AT1G26830	0.744398	0.199622	CUL3
AT1G26940	0.88594	0.16111
AT1G26945	1.57878	0.617766	KDR
AT1G27150	0.964731	0.117926
AT1G27340	0.668008	0.173162	LCR
AT1G27385	0.500718	0.0184823
AT1G27390	0.83023	0.53002	TOM20-2
AT1G27450	0.541768	-0.0105498	APT1
AT1G27480	0.771355	0.483317
AT1G27520	0.764089	0.251375	MNS5
AT1G27750	0.581703	0.0754562
AT1G27850	0.708144	0.196522	BPP5
AT1G27950	0.718126	-0.339853	LTPG1
AT1G27960	0.560964	0.0109991	ECT9
AT1G28110	0.607232	-0.00496519	SCPL45
AT1G28130	0.523316	-0.130816	GH3.17
AT1G28330	0.852771	0.57378	DYL1
AT1G28570	1.32188	-0.316576
AT1G28580	0.668093	-0.101802
AT1G29070	0.513083	0.151626	PRPL34
AT1G29150	1.09032	0.630011	ATS9
AT1G29355	3.20178	0.828298
AT1G29550	0.75785	0.0367103	EIF4E1B
AT1G29590	0.725514	-0.0398994	eIF4E3
AT1G29640	0.697104	0.463714
AT1G29660	1.04134	-0.929691
AT1G29800	0.883387	0.605485
AT1G29920	0.592668	-0.664408	CAB2
AT1G29950	0.852644	0.588826	SACL3
AT1G29960	0.657162	0.150393
AT1G30040	0.591733	0.0698978	GA2OX2
AT1G30100	0.652948	-0.218406	NCED5
AT1G30270	0.565098	0.271256	CIPK23
AT1G30320	0.760279	0.885175
AT1G30380	0.549851	-0.0113523	PSAK
AT1G30410	0.518853	0.278373	ABCC12
AT1G30475	0.832273	0.974918
AT1G30540	0.531406	0.111246	GNK
AT1G30580	0.597299	0.288693	ENGD-1
AT1G30590	0.569475	0.131432
AT1G30890	0.640845	0.41851
AT1G31230	0.533067	0.0335379	AK-HSDH I
AT1G31280	0.819823	-0.138073	AGO2
AT1G31320	0.766567	-0.66957	LBD4
AT1G31330	0.696424	-0.143223	PSAF
AT1G31350	0.50267	-0.23052	KUF1
AT1G31410	0.684443	-0.0738545	ENF2
AT1G31420	0.704483	0.214929	FEI1
AT1G31430	1.16079	0.27916
AT1G31440	0.564153	0.545701	SH3P1
AT1G31500	1.08915	0.638245	HESP
AT1G31880	0.535362	0.353062	BRX
AT1G31920	0.503765	-0.152044
AT1G32050	0.714781	0.230335	SCAMP5
AT1G32060	0.911803	0.22118	PRK
AT1G32090	0.527829	0.448302	OSCA1.8
AT1G32130	0.526753	0.236325	IWS1
AT1G32150	0.778991	0.368536	bZIP68
AT1G32170	0.582947	0.353438	XTH30
AT1G32190	0.615736	0.0168347
AT1G32220	0.508166	0.144752
AT1G32310	0.610977	0.165811	SAMBA
AT1G32550	0.531358	0.235565	FdC2
AT1G32640	0.625143	-0.170719	MYC2
AT1G32700	0.661844	0.619763
AT1G32760	0.591797	-0.276825
AT1G32870	0.737616	0.827411	NAC13
AT1G32900	0.655672	-0.197265	GBSS1
AT1G32928	0.676558	0.560708
AT1G33050	0.752118	0.165994
AT1G33055	0.668477	0.396603	HUP32
AT1G33110	0.767563	0.749113
AT1G33470	0.662978	0.372341
AT1G33810	0.51393	0.497096
AT1G33990	0.802998	-0.00986161	MES14
AT1G34010	0.847513	0.241152
AT1G34030	0.849449	0.263405
AT1G34300	0.587753	0.17795
AT1G34340	0.797093	0.367536
AT1G34380	0.821191	0.420464	OEX2
AT1G34420	0.720032	-0.0110842
AT1G34470	0.922841	0.175465	ENOR3L5
AT1G34844	0.799786	0.366056
AT1G35140	1.06125	0.224601	PHI-1
AT1G35160	0.501383	0.169731	GF14 PHI
AT1G35190	0.774911	0.195045
AT1G35210	1.13489	0.27499
AT1G35350	0.685198	0.0250108
AT1G35470	0.663011	0.348103	RANBPM
AT1G35670	0.625564	0.335888	CDPK2
AT1G35720	1.02059	0.89002	ANNAT1
AT1G36050	0.708573	0.326773
AT1G36060	0.86604	-0.326526	TG
AT1G36370	0.719226	0.529933	MSA1
AT1G43860	0.623613	0.477433
AT1G43900	0.728166	0.163103
AT1G44170	0.529633	0.405104	ALDH3H1
AT1G44790	1.08897	0.523342
AT1G44810	0.674732	0.147812	GPL4
AT1G44920	0.503424	0.0371569
AT1G44960	0.542233	0.154092
AT1G45170	0.824306	0.32717
AT1G45207	0.546816	-0.442166
AT1G45249	1.14606	0.0650376	ABF2
AT1G47128	0.598591	0.392915	RD21A
AT1G47250	0.807801	0.390331	PAF2
AT1G47290	0.592278	-0.0733839	3BETAHSD/D1
AT1G47340	0.624758	0.398827
AT1G47480	1.25521	-0.213852
AT1G47580	0.856106	0.329566	DYW1
AT1G47890	0.815679	0.0850642	RLP7
AT1G47970	0.703504	0.735266
AT1G48040	0.710315	0.303528
AT1G48050	0.823898	0.631212	KU80
AT1G48110	0.69229	0.384379	ECT7
AT1G48300	0.915053	0.212061	DGAT3
AT1G48315	0.521648	-0.468567
AT1G48440	0.700428	0.386586
AT1G48520	0.555798	0.15968	GATB
AT1G48560	0.647448	0.0542044
AT1G48860	0.609437	0.247749	EPSPS
AT1G49180	0.615281	0.687726
AT1G49240	0.553504	0.431288	ACT8
AT1G49405	1.41346	2.03268	CASPL5C3
AT1G49500	0.993294	1.04041
AT1G49670	0.531074	0.183796	NQR
AT1G49720	1.69049	2.0582	ABF1
AT1G49730	0.68736	-0.217736
AT1G49975	0.978049	0.847299
AT1G49990	0.788929	0.599631
AT1G50000	0.776993	0.37827
AT1G50020	0.660958	0.889606
AT1G50040	0.553961	0.00267398
AT1G50300	0.683488	-0.122131	TAF15
AT1G50320	0.583711	0.204687	THX
AT1G50370	0.573556	0.398498	FYPP1
AT1G50410	1.05863	0.105728	FRG2
AT1G50500	0.804978	0.0347409	HIT1
AT1G50570	0.613804	0.340288
AT1G50620	0.750378	-0.0300324
AT1G50700	0.509254	-0.0839532	CPK33
AT1G50732	0.778016	0.803577
AT1G50900	0.778617	0.25551	GDC1
AT1G50940	0.652072	0.112713	ETFALPHA
AT1G51090	1.06436	1.69573	ATHMAD1
AT1G51130	0.744179	0.472654	NSE4A
AT1G51405	0.547397	-0.220747
AT1G51430	0.646338	0.0204312
AT1G51450	0.509059	0.0637837	TRO
AT1G51510	0.541534	0.121864	Y14
AT1G51540	0.905016	0.211315
AT1G51560	0.60851	0.251412	ONE2
AT1G51580	0.549694	-0.131143
AT1G51660	0.54266	0.0316663	MKK4
AT1G51710	0.712543	0.159586	UBP6
AT1G51740	0.544903	0.239648	SYP81
AT1G51980	0.566102	0.601204
AT1G52260	1.00348	-0.0344389	PDIL1-5
AT1G52300	0.941341	0.466189
AT1G52347	0.669546	0.106467
AT1G52420	0.595339	0.313404
AT1G52565	0.731642	-0.164056
AT1G52590	0.531122	0.532348
AT1G52600	0.689288	0.282869
AT1G52640	0.641987	0.049426
AT1G52825	0.657392	0.343792
AT1G52920	0.955435	0.0728451	GPCR
AT1G53090	0.870318	0.448641	SPA4
AT1G53170	1.09816	-0.0673177	ERF8
AT1G53250	0.529656	0.370705
AT1G53290	0.568279	-0.0559074
AT1G53320	0.517606	0.335088	TLP7
AT1G53430	0.695621	0.499413	NILR2
AT1G53570	0.548467	0.192132	MAP3KA
AT1G53650	0.53299	-0.0213816	CID8
AT1G53670	1.0604	0.713048	MSRB1
AT1G53730	0.992367	0.0168299	SRF6
AT1G53770	0.59196	-0.0111783
AT1G53785	0.747587	-0.0122373
AT1G53800	0.618722	0.582158
AT1G53887	1.04091	0.737458
AT1G54080	1.08294	0.378659	UBP1A
AT1G54217	0.773976	1.21945
AT1G54350	0.579882	0.0806334	ABCD2
AT1G54390	0.551823	0.393019	ING2
AT1G54730	0.684264	0.600811
AT1G54770	0.553907	0.429602
AT1G54830	0.61045	0.390672	NF-YC3
AT1G55080	0.980317	0.0703211	MED9
AT1G55090	0.563147	0.12349
AT1G55110	0.699276	0.886031	IDD7
AT1G55120	0.62371	0.0469354	FRUCT5
AT1G55160	0.862332	0.305871
AT1G55250	0.513101	0.147453	HUB2
AT1G55310	0.538322	0.208207	SCL33
AT1G55430	0.811075	-0.464809
AT1G55450	0.953653	0.690655
AT1G55510	0.680674	0.239085	BCDH BETA1
AT1G55675	0.52097	0.364488
AT1G55850	0.857616	-0.416957	CSLE1
AT1G55880	0.851187	0.151975
AT1G56010	1.42197	0.324349	NAC1
AT1G56045	1.278	1.05887
AT1G56050	0.685873	0.102291	ENGD-2
AT1G56200	0.567804	0.257046	emb1303
AT1G56220	0.790871	0.675862
AT1G56500	0.536904	0.0329667	SOQ1
AT1G56570	0.711433	-0.0689928	PGN
AT1G56660	1.55608	1.2116
AT1G56700	0.590482	0.623296
AT1G57620	0.841218	0.44574	CYB
AT1G57990	1.01028	0.305121	PUP18
AT1G58110	0.747184	0.792954
AT1G58180	1.01448	0.801794	BCA6
AT1G58250	0.755136	-0.105901	SAB
AT1G58350	0.619809	0.444602	ZW18
AT1G59620	0.632842	0.218362	CW9
AT1G59700	0.686752	0.879956	GSTU16
AT1G59870	0.579413	0.467959	PEN3
AT1G59890	0.569278	0.358042	SNL5
AT1G59960	0.73129	-0.336844
AT1G60010	0.595459	0.50392
AT1G60500	1.38152	0.062799	DRP4C
AT1G60525	1.07809	-0.196309
AT1G60660	0.70516	0.315774	CB5LP
AT1G60690	0.925758	0.0440398
AT1G60730	0.876677	-0.0851611
AT1G60870	0.591133	0.316247	MEE9
AT1G60900	0.958947	0.405696	U2AF65B
AT1G61065	0.664189	0.214726
AT1G61170	0.663187	-0.0940664
AT1G61250	0.858171	0.570666	SC3
AT1G61420	0.519869	-0.0925868
AT1G61620	0.836455	0.516573	CSU1
AT1G61780	0.597054	0.869843
AT1G61795	1.03634	-0.0601961
AT1G61800	1.36892	1.37755	GPT2
AT1G61890	0.898767	1.2699
AT1G62380	0.923901	0.446298	ACO2
AT1G62422	0.560316	0.141079
AT1G62570	0.707086	2.49839	FMO GS-OX4
AT1G62660	0.720263	-0.147239	VI1
AT1G62680	0.598483	0.244624
AT1G63000	0.799962	-0.0762566	NRS/ER
AT1G63080	0.568151	0.0579742
AT1G63170	0.660086	0.13348
AT1G63180	1.4729	0.88784	UGE3
AT1G63240	0.788355	-0.124709
AT1G63350	0.573682	0.0829556
AT1G63360	0.57962	0.451639
AT1G63390	0.566938	-0.112804
AT1G63430	0.546105	0.74696
AT1G63460	0.726339	0.235287	GPX8
AT1G63480	0.839701	0.131873	AHL12
AT1G63660	0.859124	0.057371
AT1G63800	0.606656	-0.0871421	UBC5
AT1G63900	0.790619	0.276543	DAL1
AT1G63980	0.690574	0.379856
AT1G64270	0.602457	-0.18669
AT1G64385	0.578101	0.362482
AT1G64430	0.549641	0.0607758
AT1G64500	0.618862	0.145925
AT1G64510	0.561368	0.124104	PRPS6
AT1G64530	0.521554	0.191841	NLP6
AT1G64583	0.522889	-0.271085
AT1G64750	0.971577	0.598367	I
AT1G64780	0.789513	0.335866	AMT1;2
AT1G64810	0.874256	0.307794	APO1
AT1G64840	0.911893	0.386564	ATFDA3
AT1G65190	0.746812	0.202196	ZRK13
AT1G65230	0.859034	0.0938775
AT1G65410	0.639304	0.142519	ABCI13
AT1G65510	0.98662	-0.0203325	STMP7
AT1G65590	0.538307	0.0669338	HEXO3
AT1G65845	0.881393	-0.156577
AT1G65930	0.812875	0.13765	cICDH
AT1G65960	0.697158	0.832212	GAD2
AT1G66040	0.808887	-0.488674	VIM4
AT1G66070	0.514799	0.691094
AT1G66130	0.581494	0.229862
AT1G66350	0.980354	-0.297242	RGL1
AT1G66400	1.11478	0.0108252	CML23
AT1G66670	0.706914	0.7297	CLPP3
AT1G66680	0.75736	0.0691	AR401
AT1G66725	1.76687	0.920616	MIR163
AT1G66760	0.608273	0.43502
AT1G66810	0.539745	0.306933	ATC3H14
AT1G66820	1.3782	0.00881674
AT1G67090	0.70051	0.161009	RBCS1A
AT1G67280	0.646991	0.360879	ATGLYI6
AT1G67350	0.51413	0.283168
AT1G67480	0.57237	0.421161
AT1G67580	0.847927	0.0267167	CDKG2
AT1G67680	0.581787	0.105493
AT1G67700	0.763509	0.34742	HHL1
AT1G67710	0.674511	-0.141038	ARR11
AT1G67730	0.59754	0.0102351	KCR1
AT1G67840	0.550492	-0.0226413	CSK
AT1G67880	0.667204	0.429435
AT1G67890	0.52672	0.202786	RAF11
AT1G67920	0.996117	1.02961
AT1G68020	0.615365	0.4215	ATTPS6
AT1G68050	1.05443	1.62659	FKF1
AT1G68400	0.594226	-0.0380689
AT1G68500	0.889827	2.00202
AT1G68520	0.640541	0.164696	BBX14
AT1G68580	0.577783	0.564978
AT1G68590	0.981448	0.42906	PSRP3/1
AT1G68680	0.585495	0.289729
AT1G68840	0.72089	0.187485	RAV2
AT1G69220	0.546551	-0.0186182	SIK1
AT1G69270	0.835506	0.332091	RPK1
AT1G69310	0.584466	0.437693	WRKY57
AT1G69420	0.548618	0.351881
AT1G69480	1.27494	1.2599
AT1G69490	1.00976	0.839942	NAP
AT1G69550	0.572945	0.110602
AT1G69587	0.773639	0.200452
AT1G69640	0.554032	0.459694	SBH1
AT1G69680	1.00612	0.184283
AT1G69740	0.58645	0.326054	HEMB1
AT1G69810	0.736415	0.493696	WRKY36
AT1G69900	0.670866	-0.49323
AT1G69935	0.78101	0.225794	SHW1
AT1G70210	0.890245	-0.406246	CYCD1;1
AT1G70230	0.741071	0.0558767	TBL27
AT1G70250	0.598951	0.00675736	LTPG32
AT1G70290	0.554379	0.48925	TPS8
AT1G70310	0.975782	-0.0777274	SPDS2
AT1G70560	0.545011	0.298459	TAA1
AT1G70610	0.512061	0.0455516	ABCB26
AT1G70640	1.65543	3.3104
AT1G70700	0.730671	0.812342	TIFY7
AT1G70710	0.642741	-0.659779	GH9B1
AT1G70750	0.83478	0.198435	MYOB2
AT1G70760	1.39303	0.396168	NdhL
AT1G70810	0.735928	0.0927612	CAR7
AT1G70940	0.521759	0.0616401	PIN3
AT1G71010	0.690932	-0.00644786	FAB1C
AT1G71020	0.590662	0.255311	PUB10
AT1G71040	0.802388	0.634447	LPR2
AT1G71240	0.515869	0.329265
AT1G71360	0.532446	0.370468	SUN4
AT1G71710	0.855899	0.397757
AT1G71730	0.501339	-0.0498499
AT1G71860	0.641959	0.154212	PTP1
AT1G71865	0.766031	0.151449
AT1G71880	0.663147	-0.202733	SUC1
AT1G71910	0.558288	-0.0906759
AT1G71940	0.552609	0.220927
AT1G72030	0.771299	0.111416	GNAT10
AT1G72090	0.761188	-0.209496
AT1G72150	0.571033	0.384087	PATL1
AT1G72280	1.26328	0.267074	ERO1
AT1G72300	0.600581	-0.389411	PSY1R
AT1G72430	0.568655	0.133745	SAUR78
AT1G72450	0.633418	0.0775815	JAZ6
AT1G72480	0.547688	-0.0643757
AT1G72630	0.989942	0.797339	ELF4-L2
AT1G72640	0.586331	0.208167
AT1G72710	0.62473	0.621091	CKL2
AT1G72740	0.963768	0.185815
AT1G72750	0.578517	0.00447118	TIM23-2
AT1G72830	0.844217	0.468791	NF-YA3
AT1G72900	0.589851	0.407549
AT1G73020	0.643989	0.232459	TMEM16
AT1G73110	0.718288	0.450889
AT1G73177	1.13377	0.621348	BNS
AT1G73200	0.706456	0.400628
AT1G73240	0.698351	-0.102926
AT1G73380	0.511936	0.00972894
AT1G73390	0.754988	0.26257
AT1G73480	0.506481	0.648962	MAGL4
AT1G73490	0.667408	0.440778
AT1G73570	0.787443	-0.0571095
AT1G73650	1.15378	1.2285
AT1G73655	0.534413	0.198625
AT1G73830	0.500419	0.376418	BEE3
AT1G73950	0.617932	0.196561
AT1G74030	0.880271	-0.193232	ENO1
AT1G74170	0.654216	0.388035	RLP13
AT1G74260	0.54756	0.188142	PUR4
AT1G74290	0.650097	0.0449832
AT1G74300	0.561286	-0.459745
AT1G74330	0.846278	-0.338945
AT1G74360	0.789475	0.136508	NILR1
AT1G74370	0.86897	0.0579328
AT1G74400	0.73378	0.0515862
AT1G74450	0.740006	-0.145421	ROH1D
AT1G74470	0.524971	-0.256231
AT1G74520	0.669413	0.666626	HVA22A
AT1G74660	1.19175	0.114773	MIF1
AT1G74690	0.576638	0.194782	IQD31
AT1G74710	0.998972	-0.461477	EDS16
AT1G74790	0.630519	0.229523
AT1G74860	0.788574	0.109001
AT1G74960	0.5324	-0.0828914	FAB1
AT1G75170	1.00005	0.457969
AT1G75190	1.13828	0.664636
AT1G75220	0.890302	0.1139	ERDL6
AT1G75330	1.08493	0.0580036	OTC
AT1G75340	0.686488	0.34518
AT1G75460	0.662026	0.452681
AT1G75490	1.21634	0.370259
AT1G75750	0.806469	0.427659	GASA1
AT1G75800	0.537186	0.270937
AT1G75820	0.507301	-0.127965	CLV1
AT1G75850	0.515635	0.203112	VPS35B
AT1G75950	0.850982	0.354588	SKP1
AT1G76110	0.538124	0.459397
AT1G76150	0.763706	0.455494	ECH2
AT1G76200	0.787852	0.269998
AT1G76360	0.731211	0.0378816	PBL31
AT1G76510	0.783204	-0.00546714	ARID4
AT1G76570	0.525258	0.204338	LHCB7
AT1G76630	0.59402	0.23191	SKI3
AT1G76660	0.698306	0.343712
AT1G76890	0.502583	0.411205	GT2
AT1G76980	0.555865	0.403996
AT1G77000	0.823855	0.470704	SKP2B
AT1G77122	0.523566	0.129169
AT1G77131	0.559875	0.0470496
AT1G77210	1.06231	-0.116869	STP14
AT1G77220	0.572554	0.55718	LAZ1H1
AT1G77250	0.574898	0.344948
AT1G77320	0.5644	0.0757233	MEI1
AT1G77450	0.898213	0.223524	NAC032
AT1G77470	0.553167	0.127185	RFC3
AT1G77480	1.07453	0.0926485
AT1G77490	0.628737	0.0683409	TAPX
AT1G77540	0.759654	0.238771
AT1G77580	0.928305	0.269572	VETH3
AT1G77660	0.589775	-0.0262229
AT1G77760	0.567691	-0.211449	NIA1
AT1G78180	0.531772	0.0514234
AT1G78420	0.513145	0.624052	DA2
AT1G78510	0.952502	0.689978	SPS1
AT1G78550	0.506855	0.108714
AT1G78620	0.840006	0.0235774	VTE6
AT1G78690	0.653061	0.35194	At1g78690p
AT1G78830	0.743043	0.107729
AT1G78870	0.564545	0.297361	UBC35
AT1G78895	0.795166	0.167565
AT1G79060	0.562476	-0.131371
AT1G79110	0.52783	0.198046	BRG2
AT1G79220	0.629905	0.0528142	MTERF17
AT1G79245	0.904088	0.476994
AT1G79270	0.569941	0.661553	ECT8
AT1G79340	0.596146	0.172888	MC4
AT1G79380	0.79383	0.196796	RGLG4
AT1G79610	0.579428	0.12548	NHX6
AT1G79680	1.00941	-0.351772	WAKL10
AT1G79710	0.7023	-0.195659
AT1G79720	1.06667	0.451396
AT1G79750	0.918933	-0.0947033	NADP-ME4
AT1G79930	0.639385	0.352115	HSP91
AT1G80230	0.673662	0.108754
AT1G80245	1.09762	0.608749
AT1G80300	0.828194	0.0420695	NTT1
AT1G80400	0.555013	0.183692
AT1G80440	0.600231	0.233121	KMD1
AT1G80490	0.608204	0.384669	TPR1
AT1G80500	0.56627	0.137335	TRAPPC2
AT1G80560	0.909662	0.12891	IMD2
AT1G80680	0.959385	-0.0579561	SAR3
AT1G80720	1.21625	0.329639
AT1G80770	0.576667	0.221628	PDE318
AT1G80860	0.924869	0.0442305	PLMT
AT1G80920	1.25887	0.684593	J8
AT2G01090	0.87857	0.49948
AT2G01300	0.614612	-0.542261
AT2G01340	1.16628	-0.203425	At17.1
AT2G01420	0.538803	-0.205637	PIN4
AT2G01470	0.803278	0.185248	STL2P
AT2G01620	0.602356	0.443001	MEE11
AT2G01670	0.571121	0.794866	NUDT17
AT2G01720	0.501428	0.191848	OST1A
AT2G01730	0.850197	0.223781	CPSF73-II
AT2G01850	0.666021	0.84624	EXGT-A3
AT2G01860	0.558635	0.289041	EMB975
AT2G01918	1.59974	0.469431	PQL3
AT2G01970	0.548723	0.137217
AT2G02040	0.667135	0.487196	NPF8.3
AT2G02080	1.3165	0.69972	IDD4
AT2G02180	0.510988	0.401258	TOM3
AT2G02390	0.586234	0.299173	GSTZ1
AT2G02410	0.731574	0.577603
AT2G02450	1.48475	0.905006	LOV1
AT2G02710	0.604901	0.323278	PLPB
AT2G02770	0.617881	0.0495646
AT2G02780	0.851735	-0.0795905
AT2G02790	0.787035	0.199487	IQD29
AT2G02960	0.651488	0.144685
AT2G03060	0.675034	0.753528	AGL30
AT2G03140	0.742565	0.0506496
AT2G03667	0.856497	0.249412
AT2G03730	0.768315	0.333931	ACR5
AT2G03750	0.671172	0.227478
AT2G04230	0.592111	0.0896286
AT2G04410	0.950627	0.50041
AT2G04795	0.88261	0.447077
AT2G04880	0.708031	0.414503	ZAP1
AT2G05170	0.630769	0.246214	VPS11
AT2G05310	0.630276	0.286046
AT2G05380	0.51479	0.558184	GRP3S
AT2G05520	0.935602	0.264978	GRP-3
AT2G05540	0.839912	0.423512
AT2G05830	0.554487	0.238203	MTI1
AT2G06002	1.90473	1.14708
AT2G06005	0.629764	0.136764	FIP1
AT2G06520	0.593483	0.298157	PSBX
AT2G06850	1.03911	0.654415	XTH4
AT2G07042	1.10089	0.544137
AT2G09800	0.710923	-0.131705
AT2G10940	0.859943	-0.00345976
AT2G10950	0.611896	0.163811
AT2G11000	0.526059	0.193508	MAK10
AT2G12550	0.603879	0.290837	NUB1
AT2G13560	0.699879	0.224946	NAD-ME1
AT2G13800	0.834284	0.231445	SERK5
AT2G14080	0.594799	0.139659
AT2G14170	0.564056	0.248691	ALDH6B2
AT2G14255	0.561341	-0.0580321
AT2G14260	0.54798	0.378334	PIP
AT2G14285	1.07063	0.676627
AT2G14878	0.525544	0.0618632
AT2G15090	0.505589	0.167367	KCS8
AT2G15230	0.506471	0.234107	LIP1
AT2G15290	0.565377	0.0486403	TIC21
AT2G15820	0.511252	0.0365677	OTP51
AT2G15960	0.746849	1.19283
AT2G16250	0.654978	0.00104132
AT2G16460	0.583668	0.25417
AT2G16780	1.31881	0.226678	MSI2
AT2G16860	0.707437	0.753901	ATSYF2
AT2G16930	0.972693	0.280472
AT2G17030	0.584425	0.0957369	SKIP23
AT2G17190	0.596314	0.151313	DSK2A
AT2G17230	0.755366	0.255062	EXL5
AT2G17240	0.588313	0.254458	CGL20A
AT2G17290	0.535046	0.275466	CPK6
AT2G17320	0.830311	0.115579
AT2G17340	0.918431	0.216453
AT2G17410	0.706809	0.418377	ARID2
AT2G17420	0.688115	-0.221506	NTRA
AT2G17450	0.724163	0.359538	RHA3A
AT2G17480	0.916334	0.0442171	MLO8
AT2G17510	0.580898	0.41553	EMB2763
AT2G17520	0.520748	-0.0455653	IRE1A
AT2G17550	0.50361	0.553587	TRM26
AT2G17560	0.616097	0.381062	HMGB4
AT2G17710	0.727084	0.486821
AT2G17730	0.57279	0.625295	NIP2
AT2G17790	0.71823	0.158351	VPS35A
AT2G17840	0.698677	0.737559	ERD7
AT2G17880	0.712772	0.344051	DJC24
AT2G17970	0.55339	-0.269858	ALKBH9B
AT2G17980	0.501854	0.413313	ATSLY1
AT2G18050	0.998517	-0.620507	HIS1-3
AT2G18090	0.778528	0.186089
AT2G18400	0.752444	0.362284
AT2G18560	0.612362	-0.873668
AT2G18735	0.583593	0.446375
AT2G18910	0.750766	0.273857
AT2G18950	0.763701	0.229613	HPT1
AT2G18960	0.788365	0.031965	HA1
AT2G19260	0.663331	0.223371
AT2G19450	0.547304	0.41061	TAG1
AT2G19520	0.551424	0.173709	FVE
AT2G19530	0.502444	0.828247
AT2G19730	0.500361	0.228992
AT2G19800	0.883429	0.802317	MIOX2
AT2G19940	0.703406	0.17899
AT2G20000	0.683403	0.281651	HBT
AT2G20050	0.540064	0.216037
AT2G20140	0.735334	-0.0278425	RPT2b
AT2G20210	0.693238	-0.0445263
AT2G20410	0.666437	0.276409
AT2G20650	0.514292	-0.051808	FLY2
AT2G20670	0.905626	0.841364
AT2G20890	0.667036	0.309864	PSB29
AT2G20930	0.554288	-0.177435	L
AT2G21060	0.529436	0.279261	GRP2B
AT2G21120	0.594472	0.381937	AVI2
AT2G21180	0.582616	0.337576
AT2G21250	0.725789	0.43852
AT2G21350	0.510663	0.637547
AT2G21500	0.97834	0.352219
AT2G21790	0.815648	0.3751	RNR1
AT2G21800	1.63857	0.00968069	EME1A
AT2G21850	0.879159	-0.250966
AT2G21960	0.501032	0.295189
AT2G22080	0.671835	1.15819
AT2G22300	1.14197	0.752921	SR1
AT2G22360	1.07589	0.431497	DJA6
AT2G22370	0.977502	0.286943	MED18
AT2G22420	0.751052	0.193694	PRX17
AT2G22475	0.587929	0.0838018	GEM
AT2G22480	0.639207	-0.104253	PFK5
AT2G22490	0.54977	0.0767966	CYCD2;1
AT2G22540	0.545014	0.804842	SVP
AT2G22590	0.545992	0.486283
AT2G22840	0.701088	0.562429	GRF1
AT2G22870	0.614145	0.210655	EMB2001
AT2G22910	0.557451	-0.0589438	NAGS1
AT2G23090	0.72773	0.644609
AT2G23093	0.720124	0.191695
AT2G23100	0.569239	0.0916427
AT2G23130	0.917106	0.103289	AGP17
AT2G23360	0.60216	-0.0199858
AT2G23380	1.01782	0.0883173	CLF
AT2G23390	0.831325	0.190114
AT2G23420	0.99655	0.259406	NAPRT2
AT2G23755	0.720603	0.808902
AT2G23790	0.647274	0.0812216
AT2G24040	1.076	0.185732
AT2G24090	0.662031	0.370921	PRPL35
AT2G24250	0.824626	0.0279391	ATFDA14
AT2G24550	0.784054	0.135459
AT2G24570	0.869644	0.128506	WRKY17
AT2G24600	0.771619	-0.634046
AT2G24860	0.618696	0.235436	EIJ1
AT2G25070	0.674405	0.672292
AT2G25090	0.760582	-0.120074	CIPK16
AT2G25190	0.628579	0.253262
AT2G25220	1.5558	0.357902
AT2G25280	0.523169	0.356139
AT2G25320	0.504072	0.112218
AT2G25450	0.566329	0.530089	GSL-OH
AT2G25530	1.53582	0.795904
AT2G25710	0.702812	0.329788	HCS1
AT2G25735	1.29074	0.429352
AT2G25790	0.537271	-0.253846	SKM1
AT2G25800	0.600396	0.0897478
AT2G25830	0.627129	0.404664
AT2G25850	0.591075	0.276795	PAPS2
AT2G25900	0.639547	0.200665	ATCTH
AT2G26000	0.679931	0.353953	BRIZ2
AT2G26030	0.96024	0.278857
AT2G26110	0.637674	0.341879
AT2G26280	0.805373	0.588732	CID7
AT2G26460	0.508523	0.21862	SMU2
AT2G26470	0.756109	0.162981
AT2G26510	1.49063	0.530565	PDE135
AT2G26540	0.702861	0.269907	HEMD
AT2G26600	0.528925	0.469659
AT2G26640	0.921276	-0.042073	KCS11
AT2G26650	0.68729	0.161277	KT1
AT2G26670	0.519102	0.47662	TED4
AT2G26680	0.590472	0.081184
AT2G26840	0.639897	-0.175004	MOC1
AT2G26930	0.594325	0.237705	CDPMEK
AT2G27000	0.817744	-0.558965	CYP705A8
AT2G27020	0.568504	0.478555	PAG1
AT2G27050	0.53652	-0.131786	EIL1
AT2G27285	0.518976	0.288727
AT2G27290	0.588734	0.316199
AT2G27330	0.573082	0.409575
AT2G27385	0.751687	0.18535
AT2G27460	0.645102	0.157234	ATSEC23D
AT2G27770	0.500243	0.37892
AT2G27900	0.567897	0.116809
AT2G28100	0.875978	-0.00767433	FUC1
AT2G28130	0.880858	0.427488	ASAP1
AT2G28190	0.709552	0.0497785	CSD2
AT2G28280	1.98366	-0.172883
AT2G28305	1.798	1.10224	LOG1
AT2G28460	0.508601	-0.250555
AT2G28630	1.49848	-0.751651	KCS12
AT2G28740	0.669553	0.164256	HIS4
AT2G28830	0.957342	0.287989	PUB12
AT2G28940	0.844838	-0.1716	PBL37
AT2G28950	0.638182	-0.525314	EXPA6
AT2G29210	0.822739	0.257155
AT2G29720	0.973046	0.335713	CTF2B
AT2G29760	0.582786	0.197866	OTP81
AT2G29900	0.57638	0.154848	PS2
AT2G29960	0.790341	0.476763	CYP5
AT2G30070	0.576862	-0.147807	KT1
AT2G30230	0.86499	0.0788446
AT2G30250	0.58074	0.660055	WRKY25
AT2G30460	0.723564	0.176788	UXT2
AT2G30520	0.78103	0.0932349	RPT2
AT2G30710	0.643998	0.362199
AT2G30740	1.10765	-0.159147
AT2G30840	1.09718	0.0940238
AT2G30860	0.509618	0.643548	GSTF9
AT2G30870	0.625742	-0.0156476	GSTF10
AT2G31020	0.727977	-0.330605	ORP1A
AT2G31040	0.504633	-0.185406	CGL160
AT2G31090	0.53837	0.370546	TAX1
AT2G31160	0.944629	0.122552	LSH3
AT2G31360	0.943094	1.37726	ADS2
AT2G31380	0.96721	0.849034	STH
AT2G31810	0.693797	0.0853526	AHASS1
AT2G31955	1.39455	0.549905	CNX2
AT2G32040	0.501912	0.125729
AT2G32150	0.537385	0.727752
AT2G32230	0.53253	0.331838	PRORP1
AT2G32320	0.700281	0.974978	ICA2
AT2G32380	0.75728	0.0177981
AT2G32410	0.856894	0.162535	AXL
AT2G32520	0.695131	0.367852
AT2G32530	1.23934	0.316233	CSLB03
AT2G32540	0.805174	0.626293	CSLB04
AT2G32580	0.81353	-0.0645145
AT2G32700	1.19084	0.603916	LUH
AT2G32800	0.623048	-0.309838	LECRK-S.2
AT2G32900	0.69362	-0.349785	ATZW10
AT2G33051	0.956095	0.466376
AT2G33060	1.08266	-0.307471	RLP27
AT2G33120	0.634358	0.42998	SAR1
AT2G33170	0.504854	0.463685
AT2G33180	0.989055	-0.106722
AT2G33310	0.626783	0.280324	IAA13
AT2G33360	0.912415	0.313101
AT2G33480	0.591039	0.357535	NAC041
AT2G33530	1.4047	-0.0547484	scpl46
AT2G33600	0.747129	0.19866	CRL2
AT2G33630	0.539754	0.146094
AT2G33770	0.807395	-0.103973	PHO2
AT2G33793	1.09251	-0.281	ASY4
AT2G33835	0.558658	0.296182	FES1
AT2G34340	0.814806	-0.0857644
AT2G34420	0.744644	-0.446371	LHB1B2
AT2G34500	0.503269	-0.484537	CYP710A1
AT2G34620	0.586679	-0.990762	MTERF10
AT2G34650	0.636044	0.216981	PID
AT2G34710	0.706425	0.147529	PHB
AT2G34930	0.906519	-0.698061
AT2G34980	0.734895	-0.0229823	SETH1
AT2G35010	0.724751	0.00730449	TO1
AT2G35155	0.800271	0.240657
AT2G35530	0.840151	0.320688	bZIP16
AT2G35540	0.872001	0.0498255
AT2G35640	0.522943	-0.24903
AT2G35690	0.527345	0.181253	ACX5
AT2G35800	0.516499	0.041973	SAMTL
AT2G35830	1.38109	0.127476
AT2G35900	0.590136	0.190598
AT2G35910	0.591496	-0.260852	ATL70
AT2G35930	0.62092	-0.0301939	PUB23
AT2G36050	0.811006	-0.379314	OFP15
AT2G36080	0.556411	0.248554	ABS2
AT2G36210	2.14952	-0.429301	SAUR45
AT2G36230	0.511965	-0.125763	APG10
AT2G36250	0.615002	0.227868	FTSZ2-1
AT2G36290	0.754001	0.649727
AT2G36390	0.562354	0.532386	SBE2.1
AT2G36485	0.572042	-0.0243354
AT2G36590	0.688051	-0.59238	ProT3
AT2G36780	1.17321	0.127171
AT2G36835	0.61427	0.260498
AT2G36890	0.524871	0.642146	RAX2
AT2G36950	0.814884	-0.000553588	ATHMP20
AT2G37100	1.00634	-0.43567
AT2G37240	0.587955	0.209594
AT2G37450	0.570551	0.346296	UMAMIT13
AT2G37630	0.596906	0.0250447	AS1
AT2G37860	0.834766	-0.131489	LCD1
AT2G37940	0.701335	0.55615	AtIPCS2
AT2G37950	0.594433	0.461058
AT2G37970	0.645275	0.161059	SOUL-1
AT2G37975	0.611108	0.526899
AT2G37990	0.548353	0.518185	ARRS1
AT2G38120	1.3244	0.119161	AUX1
AT2G38140	0.714921	0.148128	PSRP4
AT2G38180	0.727108	0.113475
AT2G38230	0.62971	0.238943	PDX1.1
AT2G38310	0.638206	0.132455	PYL4
AT2G38440	0.593711	0.108007	SCAR2
AT2G38470	0.561045	0.325867	WRKY33
AT2G38610	0.686776	0.499112
AT2G38700	0.510848	-0.262098	MVD1
AT2G38820	0.508599	0.475912
AT2G38840	0.676274	0.302784	GBPL2
AT2G38950	0.668178	0.429311
AT2G39010	0.742966	0.333385	PIP2E
AT2G39050	0.632653	-0.107128	EULS3
AT2G39170	0.722215	0.631796
AT2G39200	0.984348	0.335881	MLO12
AT2G39260	0.659471	0.414081	UPF2
AT2G39290	0.561314	-0.135504	PGP1
AT2G39380	0.541774	-0.247747	EXO70H2
AT2G39400	1.12997	0.854756	MAGL6
AT2G39445	0.677068	0.358768
AT2G39480	0.617287	0.129733	ABCB6
AT2G39518	1.31568	0.560305	CASPL4D2
AT2G39550	0.824459	0.472795	PGGT-I
AT2G39580	0.56043	0.00403253
AT2G39710	0.612703	0.000524608
AT2G39730	0.583099	-0.00049181	RCA
AT2G39980	0.695366	-0.181025
AT2G40000	1.51868	0.34013	HSPRO2
AT2G40070	0.729477	0.498607	BPP1
AT2G40095	0.847882	0.266502
AT2G40130	0.536674	-0.145199	SMXL8
AT2G40330	0.559734	0.406855	PYL6
AT2G40340	0.71075	2.12637	DREB2C
AT2G40430	0.514264	0.392912	SMO4
AT2G40475	1.34814	-0.366089	ASG8
AT2G40490	0.565616	0.545677	HEME2
AT2G40600	0.518948	-0.0519679
AT2G40730	0.609631	0.224112	CTEXP
AT2G40780	0.596391	0.134777
AT2G40815	0.524724	-0.264782
AT2G40820	0.743369	0.385562
AT2G40830	0.836373	0.224795	RHC1A
AT2G40890	0.507826	0.258885	CYP98A3
AT2G40935	0.6766	0.522717
AT2G40940	0.614638	0.369486	ERS1
AT2G40960	0.52051	0.197306
AT2G41000	0.556418	0.211166
AT2G41010	0.648261	-0.354135	CAMBP25
AT2G41090	0.796724	-0.439118	CML10
AT2G41100	0.950122	0.0506174	TCH3
AT2G41200	0.742632	0.403019
AT2G41250	0.580116	0.439497
AT2G41330	0.563557	0.0649867
AT2G41350	0.536863	-0.12054	37104
AT2G41370	0.738068	0.30044	BOP2
AT2G41420	0.647019	0.302421	WIH2
AT2G41430	0.59175	0.534973	ERD15
AT2G41440	0.526149	0.193432
AT2G41490	0.859765	0.2214	GPT
AT2G41530	0.51896	0.225464	SFGH
AT2G41705	0.539642	0.172061	FEX
AT2G41730	0.771812	0.193
AT2G41760	0.527096	-0.21091	NTAQ1
AT2G41880	0.545471	0.411544	GK-1
AT2G41940	0.597492	-0.0793034	ZFP8
AT2G41945	0.528503	0.135605	RED1
AT2G42160	0.82031	0.250926	BRIZ1
AT2G42170	0.847295	-0.177992
AT2G42210	0.619316	0.422304	OEP16-3
AT2G42260	0.956904	-0.29377	UVI4
AT2G42485	0.547427	-0.0468663
AT2G42530	1.2616	2.982	COR15B
AT2G42580	0.533998	0.207989	TTL3
AT2G43070	0.953491	0.280321	SPPL3
AT2G43110	0.559917	0.480976
AT2G43140	0.929267	0.733561	BHLH129
AT2G43340	0.554032	0.511176
AT2G43350	0.791969	0.550034	GPX3
AT2G43370	0.530362	0.103834
AT2G43490	1.15672	0.480954
AT2G43570	1.35241	-0.713947	CHI
AT2G43710	0.569048	0.459737	SSI2
AT2G43760	0.517204	0.329254	CNX6
AT2G43790	0.703392	0.113606	MPK6
AT2G43820	0.503191	0.104706	UGT74F2
AT2G43910	0.856298	1.09372	HOL1
AT2G43945	0.513963	0.2416
AT2G43990	0.714808	0.0492646
AT2G44180	0.544891	0.796724	MAP2A
AT2G44200	0.630017	0.217571
AT2G44500	0.540446	0.177149
AT2G44520	0.781981	0.180161	COX10
AT2G44620	0.52693	0.273321	MTACP-1
AT2G44700	0.597928	-0.0797885
AT2G44750	1.09707	0.400742	TPK2
AT2G44790	0.939175	-0.0651671	UCC2
AT2G44920	1.33925	0.825076
AT2G44950	0.599896	0.119038	HUB1
AT2G44980	0.56702	0.23315	ASG3
AT2G45060	0.674429	0.0697039
AT2G45100	0.823688	0.109123	BRF1
AT2G45140	0.896008	0.276234	PVA12
AT2G45170	0.755873	0.869104	ATG8E
AT2G45180	1.02009	0.330434	DRN1
AT2G45190	0.64943	0.53396	AFO
AT2G45245	0.630078	-0.121601
AT2G45290	0.846756	-0.109777	TKL2
AT2G45320	0.567659	0.0203944
AT2G45430	0.603896	0.0324717	AHL22
AT2G45460	0.565079	-0.167733
AT2G45520	0.664707	0.380417
AT2G45530	0.62286	-0.187029
AT2G45600	0.868788	-0.117945
AT2G45640	0.716216	0.162305	SAP18
AT2G45850	0.689824	0.380708	AHL9
AT2G45960	0.626555	0.178977	PIP1B
AT2G46060	0.503222	-0.0853683
AT2G46090	0.58889	-0.00875807	LCBK2
AT2G46170	0.81756	0.12406	RTNLB5
AT2G46225	0.517958	-0.0973758	ABIL1
AT2G46270	0.927802	0.242413	GBF3
AT2G46310	0.642447	0.0841789	CRF5
AT2G46320	0.653356	0.150406
AT2G46430	0.801629	0.0173417	CNGC3
AT2G46450	0.777626	-0.120128	CNGC12
AT2G46505	0.740786	0.128964	SDH4
AT2G46560	0.524441	-0.0377593
AT2G46830	0.804746	0.924389	CCA1
AT2G47020	0.774404	0.0511443
AT2G47090	0.806536	-0.0847781
AT2G47170	0.521355	0.214337	ARF1A1C
AT2G47210	0.813719	0.152748	SWC4
AT2G47440	0.749839	-0.0113087
AT2G47480	0.703623	-0.441893
AT2G47680	0.696796	-0.0144378
AT2G47710	0.512943	0.181032
AT2G47800	0.553102	-0.0667124	ABCC4
AT2G47830	0.656917	0.20543
AT2G47850	0.61063	0.187798
AT2G48110	0.546008	-0.0871581	REF4
AT3G01120	0.621155	-0.0887758	MTO1
AT3G01410	0.809572	-0.0476567
AT3G01460	0.812753	-0.0242153	MBD9
AT3G01690	0.542096	0.0340025
AT3G01830	1.49463	0.693636
AT3G01850	0.700034	0.162153
AT3G01920	0.736817	0.123777
AT3G02070	0.729523	0.279506
AT3G02160	1.02245	0.371507
AT3G02380	0.516207	0.395655	COL2
AT3G02420	0.518293	0.118655
AT3G02580	0.942816	0.0825806	STE1
AT3G02610	0.710276	-0.10886	AAD2
AT3G02750	0.744802	0.449765
AT3G02760	0.508972	0.174099
AT3G02800	0.627293	0.530441	PFA-DSP3
AT3G03030	0.842361	0.283771
AT3G03070	0.542186	0.0638988
AT3G03310	0.501063	0.232099	LCAT3
AT3G03340	0.851922	0.450496	UNE6
AT3G03440	0.857706	0.29776
AT3G03460	0.84674	-0.0429136	BRIP1
AT3G03470	0.803338	-0.0248317	CYP89A9
AT3G03560	1.30798	0.605756
AT3G03780	0.862655	-0.289937	MS2
AT3G03855	0.654571	-0.404303
AT3G03920	0.562861	0.189694
AT3G04070	1.07397	0.694207	NAC047
AT3G04090	0.966512	0.155025	SIP1A
AT3G04210	1.27248	0.0983846	TN13
AT3G04230	0.739618	-0.333246
AT3G04500	0.753037	0.0308592
AT3G04570	0.597948	-0.151455	AHL19
AT3G04590	0.847587	0.145074	AHL14
AT3G04670	0.786462	0.442497	WRKY39
AT3G04680	0.932969	0.438854	CLPS3
AT3G04730	0.538117	0.474	IAA16
AT3G04780	0.963083	0.262747
AT3G04810	0.618864	0.221437	NEK2
AT3G04860	0.71214	-0.119447
AT3G04940	0.83391	0.252145	CYSD1
AT3G05120	0.750466	0.233427	GID1A
AT3G05165	0.813064	0.641452
AT3G05180	0.784014	0.331262
AT3G05380	0.545552	0.114598	ALY2
AT3G05410	0.575401	0.0940152
AT3G05510	0.724698	0.145608
AT3G05530	0.958119	0.337331	RPT5A
AT3G05685	1.12351	0.0648201
AT3G05800	0.515478	0.459882	AIF1
AT3G06060	0.813573	-0.0366904	TSC10A
AT3G06110	0.761378	0.191524	MKP2
AT3G06210	0.547606	0.0824018
AT3G06250	0.574339	0.382011	FRS7
AT3G06350	0.690935	-0.052215	MEE32
AT3G06510	0.850205	0.378825	SFR2
AT3G06540	0.569972	-0.0383326	REP
AT3G06570	0.553456	-0.0925053
AT3G06610	1.03141	0.34134	PYK
AT3G06660	1.01759	0.309418
AT3G06750	0.557762	0.30161
AT3G06760	0.787247	0.0109973
AT3G06820	0.536381	0.167911	BRCC36B
AT3G06850	0.660234	0.282887	BCE2
AT3G07020	0.591069	0.123381	SGT
AT3G07060	1.11449	0.267486	emb1974
AT3G07230	0.587645	0.661988
AT3G07260	0.502944	-0.358197
AT3G07340	0.556796	-0.224447	CIB3
AT3G07350	0.886593	0.400561
AT3G07390	0.597546	-0.12527	AIR12
AT3G07460	0.689166	0.246205
AT3G07500	0.516329	-0.0318874	FRF2
AT3G07510	0.719653	0.138052
AT3G07568	0.574265	0.107823
AT3G07650	0.920671	1.88073	COL9
AT3G07660	0.508953	0.338769
AT3G07700	0.562108	0.552313	SIA1
AT3G07780	0.563018	0.207317	OBE1
AT3G08520	0.653645	0.57364
AT3G08636	0.998758	0.145065
AT3G08640	0.546989	0.0945248	RER3
AT3G08730	0.620042	0.0481179	PK1
AT3G08740	0.747881	0.29987
AT3G08820	1.19662	-0.119662
AT3G08840	0.612999	-0.102515
AT3G08870	0.546953	0.244205	LECRK-VI.1
AT3G09032	0.52013	0.201733
AT3G09070	0.635186	-0.343432	OPS
AT3G09150	1.56568	0.392451	HY2
AT3G09200	0.791554	0.249669
AT3G09230	0.725808	0.114293	MYB1
AT3G09240	0.583463	-0.435438	BSK9
AT3G09250	0.626052	0.439127
AT3G09260	0.666712	0.018036	PYK10
AT3G09270	0.639904	0.239015	GSTU8
AT3G09370	0.571708	0.312073	MYB3R-3
AT3G09390	0.620836	0.779793	MT2A
AT3G09500	0.527141	0.249566
AT3G09760	0.85842	0.568529
AT3G09800	0.93403	0.125765
AT3G09860	0.586449	0.307857
AT3G09880	0.785591	0.0584279	ATB' BETA
AT3G09960	0.747015	-0.0228382
AT3G09980	0.588329	0.179483	ACIP1
AT3G10100	0.700565	-0.32042
AT3G10120	0.759474	0.791454
AT3G10250	0.512767	0.519977
AT3G10480	0.950804	0.299691	NAC050
AT3G10540	0.77348	0.238628	PDK2
AT3G10850	0.81723	0.198255	GLY2
AT3G10860	0.660736	0.181024
AT3G10930	0.815435	0.00911843	IDL7
AT3G11020	1.10866	1.22484	DREB2B
AT3G11090	1.07008	-0.467083	LBD21
AT3G11170	0.546635	0.161224	FAD7
AT3G11230	0.529219	0.718826
AT3G11402	0.534486	-0.277624
AT3G11490	0.819964	0.127218	ROPGAP4
AT3G11500	1.07934	0.310834
AT3G11530	0.521147	0.367886
AT3G11650	0.533996	-0.14103	NHL2
AT3G11745	0.618571	0.156986
AT3G11780	0.595171	0.443404
AT3G11820	0.528917	-0.181078	SYP121
AT3G11840	0.807234	0.12195	PUB24
AT3G11890	1.13439	0.382045
AT3G11945	0.742077	0.358542	HST
AT3G12030	0.953464	0.0888597
AT3G12130	0.592196	0.675693	KHZ1
AT3G12345	0.855052	0.0779621
AT3G12390	0.583436	0.776808
AT3G12545	2.4762	-0.171492
AT3G12560	0.588089	0.181215	TRFL9
AT3G12570	0.618522	0.435341	FYD
AT3G12620	1.15985	0.253061	PP2C.D3
AT3G12650	0.792906	-0.0413588
AT3G12670	0.661508	0.291007	emb2742
AT3G12700	0.644607	-0.420781	NANA
AT3G12980	0.619681	0.213654	HAC5
AT3G12990	0.658429	0.0327308	RRP45a
AT3G13060	0.612923	0.126425	ECT5
AT3G13062	0.791239	0.373068
AT3G13300	0.519412	0.00956583	VCS
AT3G13310	0.563158	0.37443	DJC66
AT3G13340	0.872944	0.311635
AT3G13430	0.511857	0.30143	BTL07
AT3G13445	0.891375	0.461786	TBP1
AT3G13450	1.01766	0.322556	DIN4
AT3G13490	0.580017	0.0872441	OVA5
AT3G13510	0.926349	0.320396
AT3G13550	0.731766	0.237224	FUS9
AT3G13570	0.799796	0.670507	SCL30A
AT3G13720	0.840473	0.124068	PRA8
AT3G13740	0.661131	0.436106	RNC4
AT3G13760	0.834619	-0.524344
AT3G13780	0.736143	-0.0558726
AT3G13790	0.650942	0.518349	ATBFRUCT1
AT3G13965	0.541783	-0.211794
AT3G13990	0.539824	0.176606
AT3G14230	0.687146	0.413901	RAP2.2
AT3G14330	1.02078	0.048848	CREF3
AT3G14400	0.523557	0.126466	UBP25
AT3G14420	0.629196	-0.179276	GOX1
AT3G14430	0.910496	0.236975
AT3G14660	0.511574	0.170989	CYP72A13
AT3G14770	0.660753	0.827217	SWEET2
AT3G14890	0.781266	0.665128	ZDP
AT3G14990	0.768641	0.597728	DJ1A
AT3G15090	0.626343	0.15223
AT3G15351	0.628162	0.597843
AT3G15353	0.719267	-0.205504	MT3
AT3G15450	1.4098	0.872804
AT3G15500	0.715462	0.874833	NAC3
AT3G15510	0.949056	0.181086	NAC2
AT3G15620	1.03159	0.369439	UVR3
AT3G15630	0.971999	0.834966
AT3G15780	1.08069	0.167665
AT3G15810	0.519391	0.210369
AT3G16140	0.624654	-0.301104	PSAH-1
AT3G16175	0.575345	0.286782
AT3G16180	0.823252	0.239692	NRT1.12
AT3G16210	0.672827	-0.0502322
AT3G16220	0.604752	0.512941
AT3G16240	0.792815	0.219814	DELTA-TIP
AT3G16350	0.545049	0.411151	NID1
AT3G16460	0.588712	-0.781226	JAL34
AT3G16620	0.779662	-0.104963	TOC120
AT3G16780	0.531885	0.443439	RPL19B
AT3G16860	0.788357	-0.343125	COBL8
AT3G17310	0.590702	-0.186916	DRM3
AT3G17410	0.524452	0.544962	CARK1
AT3G17420	0.586431	0.463125	GPK1
AT3G17430	0.775451	0.214435
AT3G17510	0.822749	0.60688	CIPK1
AT3G17712	0.734557	0.0162243
AT3G17940	0.655529	0.253711
AT3G18110	0.555996	-0.130163	EMB1270
AT3G18300	1.25678	-0.265986
AT3G18380	0.976916	0.312898	SHH2
AT3G18480	0.627714	0.230951	CASP
AT3G18870	0.571855	-0.178762	MTERF11
AT3G18940	1.01633	0.381205	PBAC2
AT3G19000	0.558415	-0.835061
AT3G19100	0.560061	0.183986	TAGK2
AT3G19120	0.655467	-0.211923
AT3G19280	0.943973	0.192512	FUT11
AT3G19450	1.02643	0.849003	ATCAD4
AT3G19540	0.704284	0.0624544	BDR4
AT3G19580	0.56283	-0.0479362	ZF2
AT3G19650	0.954091	0.204577
AT3G19660	1.15969	0.7541
AT3G19780	0.501038	0.0323561	DUF179
AT3G19810	0.660095	0.235978	DUF177A
AT3G19850	0.503369	-0.35594
AT3G19910	0.744764	0.00200277	CTL18
AT3G19930	0.565768	0.626762	STP4
AT3G19980	0.835722	0.487264	FYPP3
AT3G20000	0.601253	0.280912	TOM40
AT3G20020	0.758117	0.0780468	PRMT6
AT3G20070	0.70697	0.350078	TTN9
AT3G20230	0.690219	0.325397	UL18-L4
AT3G20340	0.604488	0.566936
AT3G20490	0.69504	0.183096	KNO1
AT3G20560	0.556267	-0.30861	PDIL5-3
AT3G20600	0.888712	0.261443	NDR1
AT3G20670	0.583452	0.195842	HTA13
AT3G20770	0.534955	0.958808	EIN3
AT3G20780	0.632093	0.101769	TOP6B
AT3G21055	0.711321	-0.00676715	PSBTN
AT3G21070	0.522222	-0.0253315	NADK1
AT3G21090	0.891471	-0.43606	ABCG15
AT3G21150	0.536683	0.217204	BBX32
AT3G21160	0.983825	0.509406	MNS2
AT3G21175	0.538109	0.347624	ZML1
AT3G21270	0.511634	-0.0619197	DOF2
AT3G21280	0.658338	0.185221	UBP7
AT3G21390	0.778064	0.405467
AT3G21420	1.4864	0.98787	LBO1
AT3G21480	0.756293	0.486117
AT3G21780	1.09463	-0.259699	UGT71B6
AT3G21810	0.56763	0.206391
AT3G22160	0.882585	0.0970473	JAV1
AT3G22190	0.907933	0.431995	IQD5
AT3G22200	0.938479	0.269715	POP2
AT3G22230	0.743148	0.427947
AT3G22430	0.624439	-0.0136131
AT3G22470	1.77677	0.615504	PPR3
AT3G22480	0.580418	0.381943	PDF2
AT3G22780	0.637212	-0.229355	TSO1
AT3G22830	0.521834	0.772791	HSFA6B
AT3G22890	0.56532	0.26022	APS1
AT3G22930	1.08431	0.430785	CML11
AT3G23070	0.634931	0.424193	CFM3A
AT3G23100	1.22796	0.0475979	XRCC4
AT3G23300	0.667632	0.161285
AT3G23325	1.03248	0.614035
AT3G23490	0.599075	0.133629	CYN
AT3G23530	0.581566	1.30151
AT3G23550	1.15805	-0.033343	DTX18
AT3G23805	0.681745	0.0499636	RALFL24
AT3G23880	0.73658	0.0869565
AT3G24010	0.847314	0.398438	ING1
AT3G24170	0.606611	0.393496	GR1
AT3G24315	1.14326	0.217543	AtSec20
AT3G24506	0.725222	0.309576	CGL20B
AT3G24630	0.690113	0.669047	TRM34
AT3G24660	0.595567	0.00953205	TMKL1
AT3G24730	0.926367	0.548189
AT3G24810	0.692349	0.0325934	ICK3
AT3G24820	0.786446	0.577822
AT3G25020	0.809175	0.247284	RLP42
AT3G25150	1.14978	0.392207
AT3G25250	1.58334	0.254825	AGC2-1
AT3G25510	0.83455	0.0574582
AT3G25530	0.577759	-0.0990834	GLYR1
AT3G25540	1.01469	0.349821	LOH1
AT3G25600	0.881077	0.131942	CML16
AT3G25610	0.796731	0.589952	ALA10
AT3G25660	0.531518	0.0323146
AT3G25690	0.768383	0.213147	CHUP1
AT3G25730	0.580306	0.438943	EDF3
AT3G25840	0.738946	0.166968	PRP4KA
AT3G26080	0.623202	0.120453	FBN3B
AT3G26170	1.44365	0.00867641	CYP71B19
AT3G26180	0.575463	0.121801	CYP71B20
AT3G26220	0.756861	0.0671961	CYP71B3
AT3G26440	0.742752	0.483873
AT3G26450	0.614988	0.0728293
AT3G26520	0.583661	0.00817861	TIP2
AT3G26590	1.24967	-0.235425
AT3G26618	0.545656	0.182564	ERF1-3
AT3G26680	0.606149	0.603727	SNM1
AT3G26740	0.801543	0.661536	CCL
AT3G26780	0.76421	0.264363	MEF14
AT3G26890	0.928552	0.303917
AT3G26980	0.729318	0.509161	MUB4
AT3G26990	0.615648	0.316824
AT3G27010	0.880845	-0.0395203	TCP20
AT3G27030	1.14584	0.183746
AT3G27080	0.613705	0.503121	TOM20-3
AT3G27170	0.843126	0.364953	CLC-B
AT3G27190	0.646055	0.0257716	UKL2
AT3G27220	0.748069	0.301276	HUP6
AT3G27350	0.507198	0.533196
AT3G27460	0.695552	0.447743	SGF29a
AT3G27610	0.775751	0.270236
AT3G27690	0.50564	-1.02448	LHCB2.3
AT3G27770	0.631574	0.456403	HUP53
AT3G27890	0.52373	0.422872	NQR
AT3G27930	0.95252	0.0188166	OM47
AT3G28040	0.6898	-0.0647097
AT3G28080	1.35569	0.0270757	UMAMIT47
AT3G28100	0.903959	-0.149487	UMAMIT45
AT3G28160	1.35931	0.670506
AT3G28180	0.585404	-0.170647	CSLC04
AT3G28340	0.573955	-0.437466	GATL10
AT3G28460	0.543821	0.231998
AT3G28715	0.524462	0.190889	VHA-D2
AT3G28910	0.603053	0.610952	MYB30
AT3G28920	0.650837	-0.0100154	HB34
AT3G28930	1.31555	0.446032	AIG2
AT3G28950	0.529506	0.176084
AT3G29000	1.84384	0.396763
AT3G29075	0.827933	0.172695
AT3G29100	0.578061	0.414217	VTI13
AT3G29140	0.885987	0.345213
AT3G29160	0.550322	0.389763	KIN11
AT3G29170	0.880093	0.312945
AT3G29200	0.742798	0.449636	CM1
AT3G29240	1.01286	0.313047
AT3G29390	0.550804	0.466587	RIK
AT3G29400	0.861331	0.479571	EXO70E1
AT3G29575	1.25919	0.793098	AFP3
AT3G29770	0.637154	-0.422122	MES11
AT3G30775	0.628086	0.553921	ERD5
AT3G32940	1.07833	0.0798338
AT3G42052	0.556589	0.35463
AT3G42150	0.755895	0.199497
AT3G42860	0.625631	-0.114613
AT3G43230	0.64299	0.4451
AT3G43300	0.567169	0.205091	ATMIN7
AT3G43440	0.945622	0.307332	JAZ11
AT3G43600	0.710499	0.0331628	AAO2
AT3G43720	0.664475	-0.264145	LTPG2
AT3G43810	1.11867	0.686837	CAM7
AT3G43850	0.510677	0.846159
AT3G43960	0.900836	-0.367249
AT3G44020	0.654485	0.637575
AT3G44100	0.545278	0.734662
AT3G44150	0.971902	-0.00264218
AT3G44160	0.608343	0.608484	P39
AT3G44300	1.13757	0.454026	NIT2
AT3G44600	0.523543	0.230595	CYP71
AT3G44700	0.513566	0.053549
AT3G44798	0.577413	0.375808
AT3G45050	1.29582	0.738861
AT3G45100	0.922906	0.27988	SETH2
AT3G45300	0.639501	0.601892	IVD
AT3G45590	1.19131	0.368676	SEN1
AT3G45730	0.704988	0.222696
AT3G45770	0.710883	0.172305
AT3G45980	0.684324	0.502308	HTB9
AT3G46150	0.792437	-0.213369
AT3G46280	1.44057	-0.304653
AT3G46530	0.706577	0.0146768	RPP13
AT3G46600	0.607246	0.0772038
AT3G46610	0.967303	0.193309	LPE1
AT3G46640	0.792701	0.767479	PCL1
AT3G46668	1.27263	0.466459
AT3G46780	0.521449	-1.09438	PTAC16
AT3G46820	0.790794	0.317576	TOPP5
AT3G46870	0.511474	-0.027198
AT3G46920	0.614241	0.207668
AT3G46970	0.991025	0.272356	PHS2
AT3G46980	0.516277	0.0358922	PHT4;3
AT3G47250	0.63564	-0.0840259
AT3G47290	0.509959	0.0326644	PLC8
AT3G47340	0.688816	0.452246	ASN1
AT3G47420	0.575095	0.855727	G3Pp1
AT3G47520	0.531275	0.224802	MDH
AT3G47530	0.678574	0.0404513
AT3G47590	0.506864	-0.0100438
AT3G47610	0.676935	0.406936
AT3G47670	0.569036	0.123539
AT3G47830	1.23613	0.170995
AT3G47910	0.571584	-0.239846
AT3G47965	0.813434	0.274455
AT3G48000	0.610582	0.21466	ALDH2B4
AT3G48080	0.873656	-0.219469
AT3G48110	0.509387	-0.0350798	EDD1
AT3G48310	0.975786	-0.0506262	CYP71A22
AT3G48360	1.01555	0.825225	bt2
AT3G48380	0.748646	0.45814
AT3G48410	1.14034	0.116747
AT3G48470	0.541698	0.0450223	EMB2423
AT3G48530	0.552919	0.699421	KING1
AT3G48570	0.6259	0.384772
AT3G48690	0.538346	-0.0469191	CXE12
AT3G48980	0.680567	0.0733964
AT3G49120	1.05814	0.854086	PRXCB
AT3G49140	0.517628	0.273935
AT3G49250	0.750046	0.154026	DMS3
AT3G49390	0.58755	0.120946	CID10
AT3G49470	0.604244	0.391499	NACA2
AT3G49510	1.46055	0.0105197
AT3G49640	0.817973	0.28115
AT3G49680	1.33958	0.00372936	BCAT3
AT3G49790	0.633486	0.420901
AT3G49890	0.671882	0.228631
AT3G49920	0.513238	0.110087	VDAC5
AT3G49930	0.650119	-0.759466
AT3G49940	0.577011	0.232351	LBD38
AT3G50060	0.843137	0.114628	MYB77
AT3G50140	1.04752	-0.416842
AT3G50210	0.677563	-0.163697
AT3G50260	1.00502	0.149808	CEJ1
AT3G50360	0.582429	0.725101	CEN2
AT3G50370	0.65745	-0.142427
AT3G50410	0.940882	0.0552258	OBP1
AT3G50470	0.721006	0.112635	HR3
AT3G50480	0.567504	0.0628538	HR4
AT3G50520	0.88749	0.446314
AT3G50560	1.29435	0.41064
AT3G50650	0.500734	-0.137522
AT3G50660	0.897459	0.237908	DWF4
AT3G50750	0.644952	-0.475293	BEH1
AT3G50830	0.863726	0.276912	COR413-PM2
AT3G50910	0.749198	0.501981
AT3G50920	0.537166	-0.0690108	LPPEPSILON1
AT3G51000	0.749117	-0.280513
AT3G51080	0.755265	-0.579213	GATA6
AT3G51240	0.900198	0.574574	F3H
AT3G51250	0.53215	-0.0262188
AT3G51270	0.606334	0.306037
AT3G51350	1.93876	-0.0116925
AT3G51370	0.742878	0.284268	PP2C.D6
AT3G51400	1.39421	1.07902
AT3G51520	0.892929	0.0988005	DGAT2
AT3G51530	0.583615	0.00667128
AT3G51630	1.28956	0.537017	WNK5
AT3G51640	0.529345	0.194766
AT3G51660	0.596669	1.69504
AT3G51830	0.646716	0.135828	SAC8
AT3G52050	0.578202	0.277958	OEX1
AT3G52072	0.863097	0.138064
AT3G52100	0.611497	0.0210191
AT3G52115	1.64417	0.0107805	GR1
AT3G52120	0.581171	0.272782
AT3G52280	0.669335	0.0620121	GTE6
AT3G52340	1.08867	0.364124	SPP2
AT3G52380	0.591442	0.145623	CP33
AT3G52450	0.551999	0.614403	PUB22
AT3G52470	0.718279	0.0817516
AT3G52540	0.528021	0.029752	OFP18
AT3G52950	1.10099	0.276961
AT3G53020	0.999387	0.710082	STV1
AT3G53090	0.735846	0.556127	UPL7
AT3G53110	1.04769	0.338409	LOS4
AT3G53350	1.28514	-0.00624954	RIP3
AT3G53520	0.526777	0.084823	UXS1
AT3G53610	0.583291	0.431819	RAB8
AT3G53650	0.627857	0.0572437	HTB6
AT3G53730	0.578206	0.212939
AT3G53840	0.635481	-0.442205
AT3G53850	0.664518	-0.00830673	CASPL5B2
AT3G53870	0.575684	0.209206
AT3G53930	0.635803	0.220598	ATG1B
AT3G53950	0.887785	-0.109931
AT3G53990	0.52672	0.608231	ATUSP
AT3G54030	0.97803	0.135412	BSK6
AT3G54085	0.948776	0.397096
AT3G54300	0.551161	0.399633	VAMP727
AT3G54380	0.575169	0.13935	SAC3C
AT3G54400	0.916962	0.325114
AT3G54420	0.920434	0.259651	EP3
AT3G54500	1.0249	0.29337	LNK2
AT3G54510	0.548466	-0.480933
AT3G54826	0.855676	0.316643	ZR3
AT3G54870	0.726517	-0.483405	MRH2
AT3G54880	0.664542	0.593703
AT3G54990	0.57795	0.612918	SMZ
AT3G55005	0.587501	0.110479	TON1B
AT3G55020	0.559897	0.0741705
AT3G55170	0.715201	0.333946
AT3G55320	0.503234	0.0536583	ABCB20
AT3G55360	0.598234	-0.051308	CER10
AT3G55420	1.44035	-0.469789
AT3G55610	0.640743	1.09654	P5CS2
AT3G55620	0.515694	0.307031	eIF6A
AT3G55800	0.72991	0.280693	SBPASE
AT3G55820	0.584277	0.048992
AT3G55830	0.577872	0.547329	EPC1
AT3G55980	0.677346	0.0537631	SZF1
AT3G56140	0.540515	-0.049428	RER6
AT3G56270	0.741115	-0.229996
AT3G56300	0.523998	0.10814
AT3G56320	1.04203	0.490701	NTP7
AT3G56480	1.54198	0.0860354	SCAB3
AT3G56640	0.595964	0.401916	SEC15A
AT3G56710	1.49224	0.621118	SIB1
AT3G56800	0.764165	0.349986	CAM3
AT3G56820	0.900657	0.331271
AT3G56870	1.26254	0.30904
AT3G57020	0.590767	0.618799
AT3G57030	0.90886	0.299413
AT3G57070	0.620919	0.0774617
AT3G57140	0.646897	-0.164857	SDP1-LIKE
AT3G57190	1.10068	0.367802	PrfB3
AT3G57220	0.65127	0.145964
AT3G57230	0.594256	0.279671	AGL16
AT3G57480	0.719674	0.275468	SAP13
AT3G57650	0.825456	0.185095	LPAT2
AT3G57690	3.18866	0.168155	AGP23
AT3G57710	0.533468	0.0570402	RKS1
AT3G57730	0.502607	0.074637	ZRK3
AT3G57740	0.659032	-0.0339407	ZRK4
AT3G57785	0.737654	0.000423736
AT3G58030	0.550909	0.254402	MUSE1
AT3G58130	0.564778	0.222344
AT3G58270	1.46215	-0.113603
AT3G58520	0.812586	0.369778
AT3G58540	0.538217	0.127404
AT3G58570	0.632679	0.495108	RH52
AT3G58670	0.91886	0.42532	PCO5
AT3G59000	0.520616	0.0658872
AT3G59080	0.54841	-0.294842
AT3G59110	0.621376	0.210715
AT3G59210	0.704223	0.355107
AT3G59350	0.736416	0.725768
AT3G59380	0.546416	0.127052	FTA
AT3G59700	0.940269	0.0450495	LECRK-V.5
AT3G60190	0.7214	0.348627	DL1E
AT3G60210	0.652767	0.182591	GROES
AT3G60240	0.65412	0.0550588	EIF4G
AT3G60250	0.65812	0.369301	CKB3
AT3G60340	0.721532	0.401501
AT3G60420	0.511992	0.207384
AT3G60480	0.519529	0.0920517
AT3G60510	0.574238	0.232112
AT3G60640	1.4604	0.739549	ATG8G
AT3G60690	0.868806	0.213091	SAUR59
AT3G60810	1.01667	0.0769323
AT3G60820	0.584501	0.278596	PBF1
AT3G60850	0.542104	0.00131809
AT3G61150	0.537234	0.305212	HDG1
AT3G61198	0.858038	-1.27677
AT3G61220	0.625882	0.62771	SDR1
AT3G61430	0.619079	0.100734	PIP1A
AT3G61460	0.656949	0.15674	BRH1
AT3G61470	0.58471	-0.920691	LHCA2
AT3G61580	0.501811	0.186062	SLD1
AT3G61780	0.507439	0.00209537	emb1703
AT3G61800	0.808891	0.245388	UVSSA
AT3G61898	0.575695	0.37025
AT3G62020	0.647668	-0.290353	GLP10
AT3G62110	0.67802	0.0144383
AT3G62150	1.22429	0.355473	ABCB21
AT3G62720	0.632075	-0.00490481	XT1
AT3G62780	0.591239	-0.466203
AT3G62920	0.642316	0.510122
AT3G62980	0.585497	0.267164	TIR1
AT3G63010	0.748842	0.599556	GID1B
AT3G63150	0.6413	0.228071	MIRO2
AT3G63160	1.16343	0.451194	OEP6
AT3G63240	0.517761	0.171006
AT3G63310	0.571099	-0.241524	BIL4
AT3G63400	0.856044	0.226658
AT3G63410	0.71914	0.166831	APG1
AT3G63420	1.31806	0.235887	GG1
AT3G63520	0.591613	0.12527	CCD1
AT3G63540	0.624079	0.00464285
AT4G00305	0.978459	0.00800197
AT4G00335	0.906834	0.306642	RHB1A
AT4G00390	1.25144	-0.019131
AT4G00400	0.811656	-0.0466149	GPAT8
AT4G00490	0.567544	0.310121	BAM2
AT4G00630	0.717033	-0.0217677	KEA2
AT4G00710	0.586182	0.354154	BSK3
AT4G00950	0.718711	-0.378501	MEE47
AT4G00955	0.814164	-0.378158
AT4G00970	1.27417	-0.276251	CRK41
AT4G01050	0.549531	0.0137419	TROL
AT4G01120	1.10474	0.77162	GBF2
AT4G01210	0.904254	0.122648
AT4G01250	0.973763	0.0815655	WRKY22
AT4G01290	0.944714	0.33682	CBE1
AT4G01310	0.592757	0.190466	PRPL5
AT4G01330	0.593453	0.00825452
AT4G01350	0.503289	-0.373006
AT4G01460	0.733656	-0.207357
AT4G01660	0.562117	0.401455	ABC1
AT4G01750	1.1677	-0.293805	RGXT2
AT4G01880	0.732168	0.335748	TRM13
AT4G01895	1.1131	1.36417
AT4G01960	0.532281	0.579432
AT4G01990	0.885457	0.194402
AT4G02075	0.808234	0.299169	PIT1
AT4G02100	0.63879	0.0916974
AT4G02340	0.638317	0.0212761
AT4G02440	0.603544	-0.0153993	EID1
AT4G02530	0.51324	0.430971	MPH2
AT4G02550	0.591702	0.198333
AT4G02560	0.716408	0.076367	LD
AT4G02590	0.805735	0.121828	UNE12
AT4G02725	0.670228	0.453248
AT4G02940	0.755763	-0.288795	ALKBH10B
AT4G03000	0.606716	0.165868
AT4G03020	0.641916	0.604528
AT4G03110	0.675377	0.197989	RBP-DR1
AT4G03320	1.15503	0.31789	tic20-IV
AT4G03940	1.03977	0.149072
AT4G03960	0.993767	0.379058	PFA-DSP4
AT4G04220	0.798724	-0.193399	RLP46
AT4G04223	1.14455	0.344591
AT4G04320	0.5691	0.504267
AT4G04330	0.591041	1.36616	RbcX1
AT4G04340	0.707266	0.27669	OSCA1
AT4G04570	0.56452	-0.715468	CRK40
AT4G04614	0.560009	0.351491
AT4G04850	0.528684	0.160101	KEA3
AT4G04885	0.50633	0.0962337	PCFS4
AT4G04920	0.512776	0.0854057	SFR6
AT4G05049	0.568251	0.885167
AT4G05420	0.59872	0.140845	DDB1A
AT4G05460	0.545687	0.0842856	SKIP19
AT4G06599	0.701474	0.193655
AT4G08150	0.531822	0.570325	KNAT1
AT4G08170	0.589512	0.226511	ITPK3
AT4G08310	0.587534	0.169274
AT4G08390	0.577989	0.527405	SAPX
AT4G08470	1.26336	-0.0835442	MEKK3
AT4G08555	1.2326	1.59045
AT4G08900	0.719272	0.0627228	ARGAH1
AT4G08920	0.518671	0.322901	CRY1
AT4G08930	0.68532	-0.125683	APRL6
AT4G08950	0.595867	-0.207629	EXO
AT4G08980	0.55129	0.713	FBW2
AT4G09040	0.704257	0.359938	CP33C
AT4G09580	0.555229	0.419884
AT4G09620	0.538417	0.480818	MTERF12
AT4G09670	0.655411	0.037815
AT4G09800	1.04916	0.736804	RPS18C
AT4G09830	0.873962	0.245035
AT4G10050	1.0988	0.177607	PMES
AT4G10070	0.77592	0.263183
AT4G10130	0.919141	0.302201
AT4G10170	0.964293	0.57892
AT4G10570	0.519726	0.362771	UBP9
AT4G10610	0.626342	0.138283	CID12
AT4G10620	0.689929	0.0919427
AT4G11000	1.60486	-0.169877
AT4G11100	0.925928	0.257846
AT4G11140	1.39959	0.340668	CRF1
AT4G11260	0.517677	0.493513	SGT1B
AT4G11280	0.573056	-0.0284004	ACS6
AT4G11460	1.05278	-1.11566	CRK30
AT4G11550	0.565129	-0.224671
AT4G11670	0.765677	0.130539
AT4G11830	0.964141	0.260518	PLDGAMMA2
AT4G11860	0.501877	0.353651
AT4G12080	0.61044	-0.357066	AHL1
AT4G12382	0.636895	-0.502198
AT4G12420	0.803585	0.343868	SKU5
AT4G12460	1.13528	0.315002	ORP2B
AT4G12610	0.818243	0.285716	RAP74
AT4G12640	0.779358	0.168728	ATSPEN2
AT4G12700	0.810011	0.10745
AT4G12830	1.05888	0.918766
AT4G12970	0.886938	1.00123	STOMAGEN
AT4G13020	0.60624	0.406786	MHK
AT4G13170	1.00469	0.0217996
AT4G13250	0.564713	0.809008	NYC1
AT4G13340	0.563338	0.0999219	LRX3
AT4G13350	0.702884	0.448174	NIG
AT4G13360	0.537723	0.411632
AT4G13400	1.41227	0.585808
AT4G13590	0.989273	0.559953	CMT1
AT4G13730	0.813859	0.1882
AT4G13870	0.535652	0.0982545	WRNEXO
AT4G13900	0.757657	-0.186578	RLP49
AT4G14070	1.14224	0.367744	AAE15
AT4G14145	0.736703	0.224994
AT4G14220	0.624364	0.414373	RHF1A
AT4G14342	0.738382	0.744526
AT4G14410	0.54669	0.250832	bHLH104
AT4G14660	1.08901	0.414608	NRPE7
AT4G14680	0.545773	0.174558	APS3
AT4G14690	1.36544	1.86535	ELIP2
AT4G14695	0.876613	2.31838	MPC2
AT4G14820	0.84372	-0.0667504
AT4G14860	0.565116	-0.0816007	OFP11
AT4G14870	1.29911	0.205026	SECE1
AT4G14890	0.828468	0.214576	FdC1
AT4G14930	1.09876	0.221888
AT4G15000	0.525946	0.130726
AT4G15080	0.511685	0.498102
AT4G15260	0.660079	-0.243883
AT4G15430	0.998565	1.0907
AT4G15470	0.544779	0.36707	LFG5
AT4G15480	1.25428	0.87538	UGT84A1
AT4G15490	1.24814	0.367886	UGT84A3
AT4G15530	0.844605	0.785413	PPDK
AT4G15545	0.591553	0.147478	NAIP1
AT4G15560	0.634779	0.140573	CLA1
AT4G15610	0.571407	0.614236	CASPL1D1
AT4G15760	0.904702	0.335605	MO1
AT4G15800	0.753833	0.268935	RALFL33
AT4G15802	0.568249	0.325628	HSBP
AT4G15810	0.512338	0.20021
AT4G15955	0.514637	0.0945029
AT4G15975	0.800587	-0.0833243	ATL17
AT4G16110	0.62135	0.479491	RR2
AT4G16130	0.509295	0.103685	ARA1
AT4G16144	0.548538	0.348765	AMSH3
AT4G16146	0.537448	1.71827
AT4G16150	1.00129	0.327949	CAMTA5
AT4G16390	0.602251	0.0616657	SVR7
AT4G16444	0.926447	0.36835	GET1
AT4G16500	0.673604	0.401087	CYS4
AT4G16510	0.758509	0.153829
AT4G16640	0.867427	-0.532588	AT1-MMP
AT4G16670	0.808974	-0.192147
AT4G16690	0.563826	0.290809	MES16
AT4G16710	0.68593	0.0299794
AT4G16750	0.574876	0.133268	ERF39
AT4G16760	0.588676	0.159687	ACX1
AT4G16800	0.790298	0.283484
AT4G16970	0.514692	-0.41638
AT4G17080	0.511774	0.463813
AT4G17250	0.615591	-0.533789
AT4G17260	0.550647	-0.241838
AT4G17430	0.779633	-0.0885904
AT4G17486	0.620273	0.41627
AT4G17540	0.539275	-0.219336
AT4G17730	1.34467	0.483842	SYP23
AT4G17740	0.578605	-0.11798
AT4G17880	0.65164	-0.0596517	MYC4
AT4G17970	0.799745	-0.339841	ALMT12
AT4G18010	0.603417	0.418517	IP5PII
AT4G18100	1.07472	0.546848
AT4G18140	0.620844	0.536238	SSP4b
AT4G18210	0.656051	0.403691	PUP10
AT4G18220	0.588276	-0.110129
AT4G18240	0.784321	0.465348	SS4
AT4G18260	0.57389	0.47853
AT4G18460	0.669003	-0.311219
AT4G18570	0.543754	-0.425547	IPGA1
AT4G18610	1.36145	-0.103368	LSH9
AT4G18700	0.527242	0.292672	CIPK12
AT4G18890	0.916764	0.131297	BEH3
AT4G19200	0.626399	0.232268	GPRP3
AT4G19390	0.905158	0.20526
AT4G19410	0.685999	0.990831	PAE7
AT4G19540	0.818627	0.253441	INDH
AT4G19560	0.504283	-0.0161277	CYCT1;2
AT4G19670	0.523226	0.451044
AT4G19700	0.899675	-0.247265	RING
AT4G19820	0.585288	0.133354
AT4G19830	0.719142	0.197842
AT4G19880	0.764364	0.132742
AT4G19960	1.05461	0.769973	KUP9
AT4G20260	1.28362	1.24853	PCAP1
AT4G20460	1.00522	0.119725
AT4G20780	0.971653	0.130985	CML42
AT4G20820	0.557056	-0.397987	ATBBE18
AT4G20860	0.500394	0.132845	ATBBE22
AT4G21090	0.797362	0.141769	MFDX2
AT4G21150	0.521172	-0.00108018	HAP6
AT4G21190	0.829711	0.716143	emb1417
AT4G21210	0.502778	0.0267248	RP1
AT4G21320	0.689369	0.0926742	HSA32
AT4G21410	0.546238	-0.756045	CRK29
AT4G21534	0.675687	-0.194636	SPHK2
[truncated: 943 more rows]

## Sheet: K4_3h_Loss
Supplementary Table 3
(B) Genes losing H3K4me3 after 3h of cold exposure
Gene	log2FCNvs3h	log2FCNvs3d	Name
AT1G01370	-0.525849	0.437771	HTR12
AT1G02390	-0.541246	-0.237449	GPAT2
AT1G02870	-0.689185	0.263428
AT1G04650	-0.667869	-0.463104	FLIP
AT1G04760	-0.843345	-0.161273	VAMP726
AT1G04900	-0.666263	0.391749
AT1G05100	-0.672387	0.270937	MAPKKK18
AT1G05560	-0.982375	-0.280975	UGT75B1
AT1G05562	-1.77857	-0.980152
AT1G05590	-0.653904	-0.0280031	HEXO2
AT1G06002	-1.16486	0.755378
AT1G06490	-0.794685	-0.0607339	CalS7
AT1G06640	-0.514134	-0.340862
AT1G07410	-0.8467	-0.357548	RABA2b
AT1G07485	-1.6228	0.175615
AT1G07728	#DIV/0!	-0.261526
AT1G09210	-0.632019	-0.0584295	CRT1b
AT1G09220	-0.761243	0.159818
AT1G09650	-0.630893	-0.575855
AT1G09800	-0.543898	-0.322735
AT1G10040	-0.60182	-0.0533478
AT1G10480	-0.664745	0.32818	ZFP5
AT1G10530	-0.608341	-0.28108
AT1G10770	-1.19907	0.208948
AT1G11130	-0.571234	-0.448763	SUB
AT1G11370	-0.683458	-0.0547312
AT1G11410	-0.594472	-0.581614
AT1G11420	-0.559066	-0.578173	DUF2
AT1G11785	-1.02361	0.419881
AT1G13920	-0.842283	0.139471
AT1G14315	-0.647348	-0.00173047
AT1G14520	-1.11357	-1.32266	MIOX1
AT1G14687	-0.750984	0.143896	HB32
AT1G14790	-0.671444	-0.279977	RDR1
AT1G15010	-0.668011	-0.0846727
AT1G15300	-0.623329	-0.431873	CYTOSLEEPER
AT1G15330	-0.509255	-0.101695
AT1G15480	-0.5466	0.401184	POCO1
AT1G15870	-0.960522	1.14224
AT1G16000	-0.523279	0.603432	OEP9.1
AT1G16440	-0.605921	-0.471556	RSH3
AT1G16550	-0.622859	-0.165564
AT1G16730	-0.61372	-0.0204718	UP6
AT1G17030	-1.01663	-0.500468
AT1G17550	-0.542483	-0.172891	HAB2
AT1G17600	-0.576169	-0.45962	SOC3
AT1G17750	-0.906225	-0.22785	PEPR2
AT1G18265	-0.512772	-0.00494669
AT1G18310	-0.627179	-0.37372
AT1G18410	-0.846687	-0.503175
AT1G19020	-0.536068	-0.0438642	SDA1
AT1G19396	-1.40696	0.202747
AT1G20390	-0.621681	-0.886455
AT1G20440	-0.779797	1.11746	COR47
AT1G20450	-0.699075	0.746101	ERD10
AT1G20720	-0.801456	-0.278713
AT1G21550	-1.18883	-0.986014
AT1G22160	-1.0374	-0.468323
AT1G22780	-0.502408	-0.0185724	PFL
AT1G22990	-0.819895	1.06739	HIPP22
AT1G23100	-0.714938	0.613721
AT1G24650	-0.791563	-0.437394
AT1G25360	-0.533876	-0.0703491	OTP90
AT1G26100	-0.692495	-0.446707
AT1G26150	-0.974741	-1.15218	PERK10
AT1G26260	-0.500035	0.0135799	CIB5
AT1G26530	-0.766058	0.63561
AT1G27140	-0.502081	-0.797884	GSTU14
AT1G27350	-0.70049	0.16578
AT1G27360	-0.506976	0.1385	SPL11
AT1G27820	-0.900595	-0.391341	CAF1C
AT1G27920	-1.03126	1.32726	MAP65-8
AT1G28685	-2.26765	-0.759725
AT1G29030	-0.505724	0.197522
AT1G29430	-0.678628	0.199147	SAUR62
AT1G29440	-0.974679	-0.767372	SAUR63
AT1G29450	-0.69183	-0.275499	SAUR64
AT1G29460	-0.919675	-0.809657	SAUR65
AT1G29540	-0.533065	-0.36391
AT1G29740	-0.692572	-0.141163
AT1G29965	-1.88431	-0.479897	RPL18AD
AT1G30860	-0.88046	-0.222292
AT1G30960	-0.633602	0.384822	ERA-2
AT1G31760	-0.724211	-0.49799	SWIB5
AT1G31960	-1.21195	-1.32826
AT1G32172	-0.538395	-0.476797
AT1G33120	-0.501206	0.144218
AT1G33410	-0.54842	0.0419238	SAR1
AT1G33970	-1.01521	-0.0346463	IAN9
AT1G34315	-0.825284	-0.623698
AT1G34355	-0.858522	-0.232186	PS1
AT1G35110	-1.34917	-0.725049
AT1G35513	-0.659369	-0.25212
AT1G43000	-0.766534	-0.109555
AT1G47655	-0.770802	-0.0992921
AT1G48390	-0.602422	-0.34411
AT1G48880	-0.582548	-0.251461	TBL7
AT1G49490	-0.823662	-0.464411	LRX9
AT1G49640	-0.543954	-0.755747
AT1G49910	-0.660489	-0.0807528	BUB3.2
AT1G50140	-0.554755	-0.00308326
AT1G50240	-0.941338	-0.116677	FU
AT1G50550	-1.45751	-0.378411	CYP705A26P
AT1G50630	-0.562511	-0.10145
AT1G51140	-1.24863	-1.07922	FBH3
AT1G51380	-1.07921	0.795144
AT1G51440	-0.598124	-0.939707	DALL2
AT1G51640	-2.70062	-0.391682	EXO70G2
AT1G53060	-0.662958	-0.611951
AT1G53070	-0.86516	-0.478192
AT1G53230	-1.09845	-0.851139	TCP3
AT1G53260	-0.709232	-0.00142821
AT1G53490	-0.507632	0.269663	HEI10
AT1G53542	-0.515182	0.621799
AT1G53920	-0.604429	0.00324387	GLIP5
AT1G54095	-0.521985	-0.320704
AT1G54215	-0.793316	-0.259829
AT1G55040	-0.662778	0.135865	SED1
AT1G55550	-0.533476	-0.248857
AT1G56130	-0.536365	-0.18529
AT1G57820	-0.777949	-0.446174	VIM1
AT1G58590	-0.502654	0.444775
AT1G60390	-0.704541	-0.222192	PG1
AT1G60545	-1.7898	-0.689503
AT1G61410	-0.562935	-0.177807
AT1G62085	-0.839794	0.0246875	MTERF24
AT1G62120	-0.658135	-0.0758427	MTERF32
AT1G62150	-0.644967	-0.217196	MTERF20
AT1G62710	-0.947219	0.65938	BETA-VPE
AT1G62720	-0.700241	0.504433	NG1
AT1G62900	-0.775556	-0.569038
AT1G63250	-0.550882	0.176627
AT1G63820	-0.619749	-0.0998927
AT1G64210	-0.575676	-0.222509
AT1G64250	-0.599436	-0.504504
AT1G64390	-0.527638	-0.710214	GH9C2
AT1G65240	-0.623484	-0.756803	A39
AT1G65730	-0.523829	-0.529605	YSL7
AT1G67035	-0.728319	-0.232435
AT1G67040	-0.544371	-0.469132	TRM22
AT1G67120	-0.548942	0.0277056	MDN1
AT1G67300	-0.629159	0.0875078
AT1G67365	-0.675588	0.0306164
AT1G67370	-0.533893	-0.112656	ASY1
AT1G67460	-0.621161	-0.647313
AT1G67600	-0.520647	0.307766
AT1G67792	-0.608641	0.421217
AT1G67950	-0.541042	0.0350729	BPL2
AT1G68540	-0.511444	-0.0489155	TKPR2
AT1G68570	-0.653167	-0.339894	NPF3.1
AT1G68940	-0.580689	-0.371564	PUB42
AT1G69350	-0.519961	0.138779
AT1G69440	-0.598999	-0.414505	AGO7
AT1G69950	-1.0403	0.0913387
AT1G70220	-0.805239	0.295992
AT1G70340	-0.502676	-0.261334	CORD5
AT1G70820	-1.32779	-0.387084
AT1G71060	-0.701397	0.323007
AT1G71230	-0.567826	-0.346459	CSN5B
AT1G71380	-0.586909	-0.393087	CEL3
AT1G72620	-0.651533	-0.909535
AT1G72860	-1.65106	-0.614767
AT1G73445	-0.551529	0.198105
AT1G73700	-0.63194	-0.343397
AT1G74130	-0.863341	-0.585486
AT1G74560	-0.543019	0.405622	NRP1
AT1G74630	-0.572335	-0.206
AT1G75280	-0.700864	0.0407821
AT1G75370	-0.649117	0.325884
AT1G77880	-0.548469	-0.358064
AT1G78050	-0.546539	0.384038	PGM
AT1G78476	-0.784592	0.777569
AT1G78480	#DIV/0!	-0.662253
AT1G78940	-0.707732	0.111647
AT1G78955	-0.742528	-0.0999471	CAMS1
AT1G79030	-0.691981	-0.326299
AT1G79100	-0.610269	0.435914
AT1G79800	-0.914741	-0.763931	ENODL7
AT1G79890	-0.507929	-0.101619
AT1G80120	-0.506012	-0.197009
AT1G80160	-0.528217	0.0821182	GLYI7
AT1G80270	-0.951778	0.307599	PPR596
AT1G80710	-0.636992	-0.201341	DRS1
AT1G80800	-0.614808	-0.493413
AT2G01660	-0.542564	-0.335995	PDLP6
AT2G01740	-0.511324	0.19661
AT2G02350	-0.744095	-0.345746	SKIP3
AT2G03280	-0.524234	-0.267534	RRT3
AT2G03310	-0.590941	-0.0822137
AT2G03530	-0.519219	-0.0408406	UPS2
AT2G03821	-0.881391	-0.45338
AT2G04038	-0.547951	-0.445206	bZIP48
AT2G04850	-0.640804	-0.37697
AT2G05060	-0.850847	-2.14939
AT2G05980	-0.64206	-0.503114
AT2G11880	-0.574304	-0.286154
AT2G13660	-3.01538	-0.25602
AT2G14520	-0.559584	-0.326664
AT2G17260	-0.581299	-0.175222	GLR2
AT2G19570	-0.855095	-0.112237	CDA1
AT2G19930	-0.802778	-0.231959
AT2G20560	-0.591531	-0.632855	DNAJ
AT2G20635	-0.593855	-0.419983
AT2G20710	-0.916661	-0.180749
AT2G20980	-0.599144	-0.115514	MCM10
AT2G21200	-1.07878	-1.70082	SAUR7
AT2G21450	-0.955158	-0.447214	CHR34
AT2G21830	-0.845475	-0.862737
AT2G22905	-1.0912	-0.466864
AT2G23670	-0.651506	-0.215096	YCF37
AT2G23672	-2.01092	-0.558131
AT2G23950	-0.538595	0.198887	CLERK
AT2G24310	-0.807472	-1.19571
AT2G24545	-1.87733	-0.802169
AT2G24660	-0.768955	-0.371803
AT2G24940	-2.26882	-0.315669	MAPR2
AT2G25355	-0.595493	0.29008
AT2G26267	-0.594377	-0.336889
AT2G26330	-0.580424	0.100745	ER
AT2G26900	-0.58356	0.126859	BASS2
AT2G27060	-0.515015	-0.576154
AT2G27775	-0.7331	0.258673
AT2G28000	-0.863927	0.0388389	CPN60A
AT2G29090	-0.790163	0.930117	CYP707A2
AT2G29300	-1.48399	-0.809417
AT2G29310	-1.82531	-0.720726
AT2G29600	-0.596156	-0.645039
AT2G29680	-0.640741	0.259467	CDC6
AT2G30320	-0.523293	0.0530174
AT2G30362	-1.77857	-0.205546
AT2G30820	-0.588578	-0.133234
AT2G31141	-1.2326	-0.627837
AT2G31520	-1.35431	-0.456074
AT2G31590	-0.8334	-0.34979
AT2G31840	-0.719307	0.236802	MRL7-L
AT2G32179	-1.41944	-0.70912
AT2G32315	-0.928468	-0.254293
AT2G32830	-0.597066	-0.158121	PHT1;5
AT2G32940	-0.559422	0.0793772	AGO6
AT2G33280	-0.829511	-0.148672
AT2G33847	-0.779911	0.0790087
AT2G34210	-0.605001	-0.460375	SPT5-1
AT2G34260	-0.763706	0.0885249	WDR55
AT2G35200	-0.678685	-0.616838
AT2G35290	-0.795088	-0.334593	SAUR79
AT2G35350	-0.785309	-0.519982	PLL1
AT2G35637	-1.06154	-0.530442
AT2G35760	-0.58327	-0.715974	CASPL2B2
AT2G35859	-2.61521	-0.598259
AT2G36200	-0.564204	0.0162933
AT2G36660	-0.731948	-0.491538	PAB7
AT2G36730	-0.717273	0.111296
AT2G36792	-1.58331	-1.11358
AT2G37360	-0.863225	0.133079	ABCG2
AT2G37362	#DIV/0!	-1.88939
AT2G37510	-0.516118	0.500126
AT2G37550	-0.729285	-0.891213	AGD7
AT2G37580	-1.00674	-0.309912	ATL33
AT2G38010	-0.791318	-0.520899	ATNCER2
AT2G38580	-0.643505	-0.588462
AT2G38690	-0.588268	-0.423827
AT2G38720	-0.68622	-0.0421141	MAP65-5
AT2G39250	-0.890732	-0.520237	SNZ
AT2G40008	-2.41193	-0.0498919
AT2G40390	-0.511264	0.184588
AT2G40460	-1.09242	0.141324
AT2G41178	-1.06982	0.100497
AT2G41231	-1.39964	-0.784822
AT2G41450	-0.798168	0.149181
AT2G41470	-0.669757	-0.0662712
AT2G42247	-1.1778	-0.676572
AT2G42395	-0.501796	-0.00305808
AT2G42800	-0.723533	-0.827811	RLP29
AT2G43010	-1.99257	-1.22237	PIF4
AT2G43440	-1.05515	0.05098
AT2G43550	-0.610068	0.336488
AT2G44255	#DIV/0!	-1.08127
AT2G44735	-1.07918	-0.223867
AT2G45120	-0.58428	-0.131955	ZAT4
AT2G45560	-0.537124	-0.364462	CYP76C1
AT2G45890	-0.794864	-0.334495	ROPGEF4
AT2G46192	-0.61761	0.191568
AT2G47115	-0.778346	-0.17503
AT2G47180	-0.586999	1.1767	GolS1
AT2G47340	-0.639264	-0.902053
AT2G47360	-0.597709	-0.480662
AT2G47570	-0.660278	-0.529592
AT2G47895	-1.0325	-1.55444
AT2G48120	-0.613856	-0.124817	PAC
AT3G01030	-0.785152	-0.653882
AT3G01200	-1.68866	0.866605	RP2
AT3G01202	-1.92183	-0.217122
AT3G01580	-0.575769	-0.110055
AT3G02820	-0.531657	-0.14964
AT3G02832	-0.526757	0.141351
AT3G02850	-0.621123	-0.0421003	SKOR
AT3G03060	-0.62159	0.392538	SBA1
AT3G04530	-0.509828	-0.587614	PPCK2
AT3G04850	-0.580373	-0.206582
AT3G04950	-0.828624	0.0840909
AT3G05320	-0.619568	-1.04856	OFT1
AT3G05470	-0.502874	-0.691579	FH11
AT3G05550	-0.622757	0.282454	ATHIGD3
AT3G05630	-0.839074	-0.39277	PLDP2
AT3G05905	-0.659869	0.363618
AT3G06142	-1.51048	0.830551
AT3G06890	-0.56494	0.0855288
AT3G07120	-0.623145	-0.361676
AT3G07250	-0.678663	-0.400526
AT3G08970	-1.01059	-0.259158	ATERDJ3A
AT3G10450	-0.662089	0.0546006	SCPL7
AT3G10520	-0.551841	0.035298	HB2
AT3G11370	-0.668784	-1.15126
AT3G11550	-0.50299	-1.07304	CASP2
AT3G12340	-0.604159	0.339763
AT3G12770	-0.629113	0.186534	MEF22
AT3G12915	-0.545399	-0.124841
AT3G13280	-0.927263	-0.452366
AT3G13600	-0.525282	-0.445789
AT3G13710	-0.914216	0.43378	PRA1.F4
AT3G13770	-0.673104	-0.0656535
AT3G14070	-0.507799	-0.432436	CAX9
AT3G14270	-0.5126	0.200363	FAB1B
AT3G14735	-0.612827	-0.418888	U6-1
AT3G15352	-0.564862	0.165736	COX17
AT3G15357	-0.677681	-0.238739
AT3G15550	-1.51285	-1.10642
AT3G15570	-1.06211	-1.52876
AT3G15930	-0.85374	0.0552907
AT3G16130	-0.825538	-2.0009	ROPGEF13
AT3G16310	-0.592188	0.145731
AT3G16610	-0.681843	-0.182482
AT3G17120	-0.745424	-0.564091
AT3G17130	-0.861855	0.397576
AT3G17270	-1.05382	-0.346611
AT3G17380	-1.47335	-0.354905
AT3G17640	-0.674221	-0.596882
AT3G17830	-0.71923	0.0390611	DJA4
AT3G18600	-0.645531	0.459335
AT3G18610	-0.633498	-0.444221	NUC-L2
AT3G18850	-0.672939	-0.247172	LPAT5
AT3G18880	-0.651784	-0.275724
AT3G19050	-0.776058	-0.359588	POK2
AT3G19390	-0.561446	-0.24859
AT3G20075	-1.40327	-0.56616	CYP705A14P
AT3G20260	-0.781268	-0.203383
AT3G20420	-0.651712	-0.368917	RTL2
AT3G20900	-0.622799	0.484775
AT3G21755	-1.44074	-0.159016
AT3G22090	-0.950877	-0.407039
AT3G23240	-0.525132	-0.669033	ERF1
AT3G23370	-0.900508	0.380228
AT3G23990	-0.657139	-0.0470349	HSP60
AT3G24090	-0.903258	0.0236293	GFAT
AT3G25230	-0.500386	0.105081	ROF1
AT3G25770	-1.19026	-0.329195	AOC2
AT3G25870	-0.7388	-0.23356
AT3G25900	-0.587717	-0.556359	HMT-1
AT3G26445	-0.567401	-0.325421
AT3G26480	-0.944332	-0.648167
AT3G26855	-0.861184	-0.436441
AT3G26922	-0.898197	-0.0514365
AT3G27415	-1.91914	-0.712452
AT3G27550	-0.653026	0.216751	CFM9
AT3G28220	-0.633969	0.618715
AT3G28315	-0.837332	-0.669297
AT3G29280	-0.898459	0.354838
AT3G29320	-0.705243	-0.864554	PHS1
AT3G29680	-0.565935	-0.237318
AT3G32920	-0.97511	-0.0704934
AT3G43240	-0.549747	0.140433	ARID5
AT3G43654	-0.621202	-0.523399
AT3G43690	-0.65578	-0.716141
AT3G44120	-0.641332	-0.0440077
AT3G44850	-0.555138	-0.10942
AT3G44970	-0.828195	0.630555
AT3G44990	-1.66416	-1.47904	XTH31
AT3G46666	-1.171	-0.229721
AT3G47780	-0.574496	0.098163	ABCA7
AT3G47840	-0.710403	0.0212715
AT3G48120	-0.866178	-0.156737
AT3G48250	-0.6788	0.304849	BIR6
AT3G48460	-0.724556	-0.464694	SFAR4
AT3G48540	-0.627801	0.0709961
AT3G48830	-0.621287	0.284521
AT3G49410	-0.507446	0.352686
AT3G50350	-0.570684	0.089392
AT3G50845	-0.628608	0.0758349
AT3G50960	-0.770139	0.41077	PLP3a
AT3G51478	-1.03083	-0.377301
AT3G51560	-0.61088	-0.361112
AT3G52605	-1.24134	-0.550649
AT3G52610	-0.726913	0.0339303
AT3G53220	-0.589042	0.495677
AT3G53230	-1.36618	0.224878	ATCDC48B
AT3G53370	-0.55528	-0.32168
AT3G53800	-0.611747	0.447926	Fes1B
AT3G53830	-0.81444	-0.687126
AT3G54270	-0.603363	-0.212506
AT3G54625	-1.03406	0.266013
AT3G54780	-0.859231	-0.220435
AT3G55690	-0.591389	-0.428278
AT3G56070	-0.701485	0.241745	ROC2
AT3G56330	-0.537311	0.0446961	TRM1C
AT3G56825	-0.916014	-0.721929	U2.4
AT3G57157	-0.715163	0.163619	SORF5
AT3G57440	-0.675541	-0.114059
AT3G57540	-0.584733	-0.334352	REM4.1
AT3G57630	-0.555422	0.0312271	EXAD
AT3G57680	-0.940911	-0.0823735
AT3G57765	-2.1793	-2.2018	U2.3
AT3G57780	-0.729067	0.00661773
AT3G57940	-0.532706	0.601106
AT3G58150	-0.761144	-0.124191
AT3G58930	-0.649069	-0.851528
AT3G58980	-0.685832	-0.0541472
AT3G59068	-2.01538	-0.239786
AT3G59200	-0.66441	-0.576532
AT3G60260	-0.520998	0.129791
AT3G60961	-1.26348	-0.0790283
AT3G61450	-0.719847	-0.601311	SYP73
AT3G61571	-1.10692	-0.0454497
AT3G62050	-0.522647	-0.410949
AT3G62300	-0.517562	-0.284538	DUF7
AT3G62430	-0.70513	-0.752273
AT3G62600	-0.692665	-0.0569802	ATERDJ3B
AT3G63480	-0.68146	-0.672368	KIN-1
AT4G00240	-0.705456	-0.267711	PLDBETA2
AT4G00620	-0.697585	0.0318517	EMB3127
AT4G00760	-1.07194	-0.371984	APRR8
AT4G01030	-0.573085	-0.0167245
AT4G01080	-0.540628	-0.0469072	TBL26
AT4G02690	-0.750364	-0.441933	LFG3
AT4G04190	-0.719031	0.234896
AT4G05018	-0.50948	-0.113351
AT4G05120	-0.606588	0.508205	FUR1
AT4G05631	-0.60839	-0.271161
AT4G06746	-0.819085	0.78	RAP2.9
AT4G07960	-0.740098	-0.556839	CSLC12
AT4G08040	-0.509599	-1.10007	ACS11
AT4G08210	-0.599783	0.120651
AT4G08590	-0.516805	-0.295389	ORTHL
AT4G09060	-0.52338	0.672629
AT4G09480	-0.66237	0.319627
AT4G09510	-0.611856	0.294141	CINV2
AT4G09920	-0.616883	-0.602158
AT4G10200	-0.670388	0.216296
AT4G10390	-0.606284	-0.447232
AT4G10650	-0.521081	-0.00537982
AT4G10770	-0.678046	-0.925826	OPT7
AT4G12005	-0.693352	0.480129
AT4G12850	-0.542475	0.110458	FRF3
AT4G12910	-0.5604	0.698941	scpl20
AT4G13505	-0.934151	-0.751361
AT4G13540	-0.523199	-0.638259	ADR
AT4G13810	-0.561587	-0.463525	RLP47
AT4G13990	-0.654446	-0.303233
AT4G14090	-0.649143	0.163938
AT4G14165	-0.863558	-0.310547	ATFDB25
AT4G14180	-0.52949	-0.260429	PRD1
AT4G14840	-0.831874	-0.171957
AT4G15230	-0.642993	-0.143203	ABCG30
AT4G15570	-0.623937	0.340613	MAA3
AT4G15920	-0.504434	0.0175668	SWEET17
AT4G16600	-0.523388	-0.282215	PGSIP8
AT4G16892	-0.564967	-0.161821
AT4G18490	-0.522642	-0.429055
AT4G18830	-0.591327	-0.0843922	OFP5
AT4G20715	-0.607674	-0.288733
AT4G20760	-0.610711	-0.130851
AT4G21220	-0.527686	0.53375	LPXD2
AT4G21890	-0.577009	-0.611363
AT4G21930	-1.56531	-0.783302
AT4G22620	-0.545984	-0.339746	SAUR34
AT4G22760	-0.682061	-0.202142
AT4G22970	-0.534422	-0.108587	ESP
AT4G23020	-0.710314	-0.55478	TRM11
AT4G24026	-0.562155	-0.33927
AT4G25350	-0.76554	-0.354665	SHB1
AT4G25630	-0.686292	0.334108	FIB2
AT4G25690	#DIV/0!	-1.40213
AT4G26170	-0.708532	-0.000279817	ET1
AT4G26270	-0.506988	-0.080504	PFK3
AT4G26510	-0.507903	0.228356	UKL4
AT4G26530	-0.530736	-0.127089	FBA5
AT4G26590	-1.02429	-0.705038	OPT5
AT4G26700	-0.550797	-0.142166	FIM1
AT4G26800	-0.658305	0.12051
AT4G26830	-0.69556	-0.221889
AT4G27220	-0.688782	-0.503599
AT4G27850	-0.909716	-0.674495
AT4G28280	-0.510126	-0.819555	LLG3
AT4G28330	-0.77364	-0.00901031
AT4G29150	-0.758703	-0.202808	IQD25
AT4G29360	-0.511233	-0.300974
AT4G29520	-0.908438	-0.179089	SES1
AT4G30330	-0.730031	0.356188	PCP-LIKE
AT4G30800	-0.63523	0.197865
AT4G30975	-0.610621	-0.234469
AT4G31230	-0.978188	-0.147274
AT4G31240	-0.58159	0.382559	NRX2
AT4G31250	-0.840567	-0.666474	PRK7
AT4G31790	-0.539643	0.512575
AT4G32990	-0.521219	-0.214522
AT4G33370	-0.569299	-0.754211
AT4G33490	-0.948608	0.158433
AT4G33905	-0.539748	0.260401
AT4G34650	-0.784358	0.653587	SQS2
AT4G35320	-0.758207	0.229089
AT4G35520	-0.585134	0.0333898	MLH3
AT4G35590	-0.723452	-0.401085	RKD5
AT4G35680	-0.528937	0.271492
AT4G36060	-0.501234	0.149701	bHLH11
AT4G36100	-0.992948	-0.774841	COST3
AT4G36450	-1.00616	-0.0510698	MPK14
AT4G36470	-0.577054	0.648725
AT4G36515	-0.543494	0.407456
AT4G36808	-1.93057	1.04949
AT4G36830	-1.21195	-0.671464	HOS3-1
AT4G37225	-2.31811	-0.0143242
AT4G38010	-0.778797	-0.198311
AT4G38050	-0.51276	-0.0634965
AT4G38370	-1.06962	-0.211949
AT4G38495	-0.557228	-0.293925	EEN
AT4G38530	-0.514278	-0.661919	PLC1
AT4G38545	-0.531613	-0.100773
AT4G38550	-1.04947	0.536652
AT4G38781	-1.37476	-0.999574
AT4G38850	-0.802034	0.0414649	SAUR15
AT4G38950	-0.627725	-0.542165
AT4G39030	-0.551856	-0.381209	EDS5
AT4G39340	-1.53593	-2.30203	EC1.4
AT4G39790	-0.749513	-0.247344
AT4G40045	-0.556642	0.0311434
AT4G40085	-2.2656	0.0464848
AT5G01380	-1.08161	-0.25434
AT5G01420	-0.67123	-0.436472
AT5G01540	-0.813245	-0.873681	LECRK-VI.2
AT5G01600	#DIV/0!	#DIV/0!	FER1
AT5G02310	-0.597272	-0.111994	PRT6
AT5G02360	-0.521869	-0.399155
AT5G03435	-1.01388	-0.655312	MCTP13
AT5G03620	-1.00532	-0.463661
AT5G04840	-0.581235	-0.235391
AT5G04950	-0.945137	-0.672505	NAS1
AT5G05510	-0.833412	-0.0142075
AT5G05530	-0.782245	0.408479
AT5G06000	-0.731116	0.135324	EIF3G2
AT5G06380	-0.701635	-0.528148
AT5G06410	-0.540699	-0.118383	HSCB
AT5G06490	-0.818023	-0.976967	ATL71
AT5G06670	-0.932491	-0.313741	KIN7.5
AT5G07130	-0.766255	-0.682866	LAC13
AT5G07842	-1.65443	-0.304703
AT5G08360	-0.553039	0.028728
AT5G08600	-0.788621	-0.521865
AT5G09520	-0.848547	-0.421688	PELPK2
AT5G09530	-0.623885	-0.501251	PELPK1
AT5G09810	-0.561312	-0.195656	ACT7
AT5G09840	-0.6153	0.205519	MNU2
AT5G10510	-0.591642	-0.0175782	AIL6
AT5G10770	-0.630047	-0.0465694
AT5G10850	-0.751149	-0.348386
AT5G10970	-0.788881	-0.246756
AT5G10990	-0.956382	-0.655676	SAUR69
AT5G12110	-0.943138	-1.34724
AT5G13150	-0.503713	-0.559407	EXO70C1
AT5G13660	-0.575626	-0.537363
AT5G13700	-0.863794	-0.652394	PAO1
AT5G14210	-0.723391	-0.406642
AT5G14450	-0.586716	-0.392801
AT5G14570	-2.05597	0.0190588	NRT2.7
AT5G15550	-0.50029	0.384666	ATPEP2
AT5G15830	-0.61734	-0.151513	bZIP3
AT5G16410	-0.645988	-0.266485
AT5G17210	-0.835957	0.157696
AT5G18748	-1.21606	-0.0133093
AT5G18820	-0.728745	0.235348	CPNA2
AT5G20640	-0.58885	-0.363151
AT5G20940	-0.543051	-0.114137
AT5G22608	-0.597355	-0.601836
AT5G22740	-0.752192	0.104127	CSLA02
AT5G23235	-1.15237	-0.459241
AT5G23480	-0.997686	-0.212259
AT5G23600	-0.501341	-0.040115
AT5G23955	-0.564588	-0.302316
AT5G25010	-0.537757	-0.325093
AT5G25130	-0.794193	0.214794	CYP71B12
AT5G25450	-0.734576	-1.23116
AT5G26582	-1.10328	-0.745897
AT5G26850	-0.599594	0.0430557
AT5G27330	-0.71658	-0.336553
AT5G27660	-0.605315	0.256125	DEG14
AT5G28340	-0.506135	-0.0269648
AT5G28913	-0.613756	-0.0162604	SADHU4-1
AT5G35420	-0.972854	0.0882605
AT5G35600	-0.776138	-0.0349509	HDA7
AT5G35935	-0.572303	-0.467192
AT5G36937	-0.520825	-0.41175
AT5G37415	-0.804383	0.156008	AGL105
AT5G37460	-0.608711	0.248252
AT5G38565	-0.826078	-0.46309
AT5G38740	-0.626414	-0.0505858	AGL77
AT5G38890	-0.525695	0.36171
AT5G39320	-0.79282	-0.496322	UDG4
AT5G39790	-0.634502	0.191284	PTST
AT5G40030	-0.573988	-0.475142	PAXL
AT5G40250	-0.504207	-0.0912904	ATL46
AT5G40480	-0.770718	0.25006	EMB3012
AT5G41030	-0.657249	-0.436446
AT5G41460	-0.823528	-0.189131
AT5G42040	-0.709579	-0.567889	RPN12b
AT5G42060	-0.665576	0.558756
AT5G42120	-0.898428	-0.357744	LECRK-S.6
AT5G42825	-0.501687	0.458502
AT5G43400	-0.764499	-0.613897
AT5G43500	-0.531913	0.0299359	ARP9
AT5G43980	-0.74311	-0.372113	PDLP1
AT5G43990	-1.39904	-0.828074	SUVR2
AT5G44050	-0.57521	-0.420367	ATDTX28
AT5G44410	-0.540098	-0.221128	ATBBE27
AT5G44490	-0.513486	0.0979983
AT5G45150	-0.553325	-0.0936145	RTL3
AT5G45470	-0.508042	-0.0847817
AT5G45580	-0.568901	-0.482363	GFR
AT5G45830	-0.665695	-0.0329244	DOG1
AT5G45950	-0.855653	0.0595971
AT5G46880	-0.551561	-0.154315	HB-7
AT5G46910	-0.508562	-0.294624	JMJ13
AT5G47170	-0.942967	-0.184148
AT5G47460	-0.594108	0.241496
AT5G47720	-0.600439	-0.233392	AACT1
AT5G48090	-0.568921	-0.187071	ELP1
AT5G48110	-0.686816	0.323869	TPS20
AT5G49152	-1.9271	0.48425
AT5G49580	-0.613734	0.0671924
AT5G50240	-0.674641	-0.0515797	PIMT2
AT5G51480	-0.999745	-0.731725	SKS2
AT5G52640	-1.09938	-1.86476	HSP90.1
AT5G53020	-0.653139	-0.136303
AT5G53120	-0.772841	-0.792081	SPDS3
AT5G53810	-0.595017	-0.344685
AT5G54970	-0.556808	-0.0166699
AT5G55400	-0.908515	-0.304316	ATFIM4
AT5G55640	-0.566336	0.177741
AT5G55930	-0.741662	-0.451648	OPT1
AT5G56010	-0.817884	-0.704082	HSP81-3
AT5G56030	-0.658041	-0.631075	HSP81-2
AT5G57050	-0.629109	0.233447	ABI2
AT5G57080	-0.715628	0.368844
AT5G57840	-0.539343	0.112429
AT5G58300	-0.521065	-0.234512
AT5G58320	-0.571527	-0.113133	NET4A
AT5G59170	-0.666552	-0.551623
AT5G59662	-0.662212	-0.228667
AT5G59730	-0.727452	-0.114221	EXO70H7
AT5G59850	-0.50702	0.21906
AT5G59940	-0.546184	-0.229979
AT5G60100	-0.679551	1.28999	PRR3
AT5G60730	-0.733692	0.599917	GET3C
AT5G61030	-0.511268	0.667724	RBGA7
AT5G61800	-0.720956	-0.253927
AT5G62310	-0.588203	-0.296761	IRE
AT5G62970	-1.05503	-0.332638
AT5G63800	-0.586752	-0.0486132	MUM2
AT5G64160	-0.674137	0.116106
AT5G64400	-0.528743	-0.495806	AT12CYS-1
AT5G64490	-0.659766	-0.718288	APUM26
AT5G64510	-0.988847	-0.718007	TIN1
AT5G64980	-0.678104	0.18867
AT5G65880	-0.688522	0.0109176
AT5G66310	-0.683803	-0.559449
AT5G66558	-1.26882	0.788126
AT5G66580	-0.743469	-0.216468
AT5G66630	-0.566782	-0.0215298	DAR5
AT5G66740	-0.857963	-0.374565	BDR8
AT5G66960	-0.63012	0.224048
AT5G67110	-0.644681	-0.457237	ALC
AT5G67490	-3.32367	-1.40343	SDHAF4

## Sheet: K4_3d_Gain
Supplementary Table 3
(C) Genes gaining H3K4me3 after 3d of cold exposure
Gene	log2FCNvs3h	log2FCNvs3d	Name
AT1G01020	0.707579	0.573353	ARV1
AT1G01050	-0.029366	0.716814	PPa1
AT1G01060	1.02749	0.736783	LHY
AT1G01170	0.706129	0.656828
AT1G01240	0.396875	0.635267
AT1G01470	1.13901	1.16311	LEA14
AT1G01490	0.350148	0.81977	ATHMP01
AT1G01520	0.953983	1.21106	ASG4
AT1G01550	0.492234	0.770872	BPS1
AT1G02340	-0.0249402	0.701391	HFR1
AT1G02400	0.138022	0.801291	GA2OX6
AT1G02610	0.753654	1.34551
AT1G02820	0.148407	0.835389	LEA3
AT1G02880	0.127153	0.529784	TPK1
AT1G02920	-0.123257	0.713893	GSTF7
AT1G02930	0.466522	0.71839	GSTF6
AT1G02990	1.18647	0.515504
AT1G03610	0.670562	0.567553
AT1G03850	0.199701	0.821224	GRXS13
AT1G03950	0.892587	0.50961	VPS2.3
AT1G04190	0.588065	0.510331	TPR3
AT1G04240	0.24663	0.764212	SHY2
AT1G04400	0.283592	0.818399	CRY2
AT1G04410	0.218288	0.549353	c-NAD-MDH1
AT1G04570	2.36764	2.07739
AT1G04620	-0.0888566	0.722828	HCAR
AT1G04640	-0.226207	0.517443	LIP2
AT1G04860	0.504824	0.569065	UBP2
AT1G04960	0.0513322	0.516117
AT1G05065	0.316944	0.809861	CLE20
AT1G05340	-0.133081	1.04665	ATHCYSTM1
AT1G05385	0.506785	0.536244	LPA19
AT1G05785	0.737782	0.660548
AT1G06020	0.910963	0.509324	FRK5
AT1G06180	0.906026	1.34698	MYB13
AT1G06430	0.940232	0.811382	ftsh8
AT1G06980	0.426474	0.743616
AT1G07050	1.30563	2.18486	FITNESS
AT1G07450	-0.208105	0.942701
AT1G08320	0.278402	0.629311	TGA9
AT1G08360	0.660212	0.574854
AT1G08410	0.775938	0.52472	LSG1-2
AT1G08465	0.250338	0.869168	YAB2
AT1G08550	0.495597	0.518485	NPQ1
AT1G08570	0.0450978	0.616446	ACHT4
AT1G08810	0.649272	0.588859	MYB60
AT1G08890	0.404486	1.20485
AT1G08920	-0.165183	1.45619	ESL1
AT1G08970	-0.0281858	0.597064	NF-YC9
AT1G09350	0.497802	3.74538	GolS3
AT1G09570	0.121235	0.679463	PHYA
AT1G09840	0.355449	0.581552	SK41
AT1G10070	0.476721	0.535217	BCAT-2
AT1G10090	0.150877	0.579063
AT1G10200	0.187922	0.576404	WLIM1
AT1G10410	0.352311	1.35834
AT1G10417	-0.202938	0.707951
AT1G10650	-0.118327	0.851836
AT1G10657	0.447419	0.711058	DEG17
AT1G10682	0.131252	0.84611	SORF1
AT1G10760	0.671997	0.98478	SEX1
AT1G10865	-0.305875	0.60922
AT1G11170	0.174953	0.840816
AT1G11200	-0.0631107	0.706102
AT1G11210	1.39142	1.47858
AT1G11260	1.16191	0.675517	STP1
AT1G11475	0.63527	0.591036	NRPB10
AT1G11530	0.249361	1.2558	CXXS1
AT1G11660	-0.148015	0.633043	HSP70-16
AT1G11670	0.565786	0.563729
AT1G11890	0.900233	0.516743	SEC22
AT1G11910	0.462322	0.500118	APA1
AT1G11960	1.1961	0.702512	OSCA1.3
AT1G12120	-0.179012	1.03652
AT1G12370	0.168957	0.531405	PHR1
AT1G12420	0.276824	1.43163	ACR8
AT1G12650	-0.353083	0.552025
AT1G12710	0.180859	0.735009	PP2-A12
AT1G13190	0.832395	0.565323
AT1G13195	0.221726	0.952244
AT1G13245	0.991847	0.881506	RTFL17
AT1G13270	-0.212157	0.50267	MAP1C
AT1G13330	0.484336	0.897812	AHP2
AT1G13390	0.156509	0.633097
AT1G13460	0.50419	0.517647
AT1G13640	0.536936	0.524692
AT1G13670	1.47429	0.935909	BGL2
AT1G13700	1.0705	0.594293	PGL1
AT1G13730	0.49288	0.868726
AT1G14130	0.0548961	0.658715	DAO1
AT1G14170	0.263688	0.692512
AT1G14685	-0.055807	0.679877	BPC2
AT1G14720	0.314419	0.743635	XTH28
AT1G14820	0.445544	0.587636
AT1G15340	0.133016	0.572026	MBD10
AT1G15370	0.693011	0.51382	LOLITA
AT1G15420	-0.123712	0.50069	PCP1
AT1G15750	0.97313	0.583459	TPL
AT1G15860	0.469846	0.593954
AT1G15870	-0.960522	1.14224
AT1G16000	-0.523279	0.603432	OEP9.1
AT1G16540	0.17072	0.581988	ABA3
AT1G16560	1.14995	0.534598
AT1G16635	-0.0918451	0.784014
AT1G16810	-0.0787042	0.599016
AT1G16850	-0.183204	1.93975
AT1G17090	-0.0824383	0.591897
AT1G17145	0.705207	0.581888
AT1G17170	0.405249	1.37555	GSTU24
AT1G17190	0.364284	1.2976	GSTU26
AT1G17200	0.296536	0.625275	CASPL2A1
AT1G17455	0.4219	0.695831	ELF4-L4
AT1G17470	0.674623	0.633202	DRG1
AT1G17665	0.358819	1.01075
AT1G17880	0.218655	0.537235	BTF3
AT1G17940	0.207572	0.978689
AT1G18060	0.00194084	0.511639	FBN-LIKE
AT1G18090	-0.0471471	0.595493
AT1G18400	0.250445	0.782262	BEE1
AT1G18660	0.29946	0.631935	IAP1
AT1G18730	0.739766	0.770389	PnsB4
AT1G19180	0.728252	0.895164	JAZ1
AT1G19200	0.354894	0.543887
AT1G19310	0.538498	0.557415
AT1G19400	0.351068	0.560838	E-4PDHASE
AT1G19530	0.010884	1.34351
AT1G19860	0.664411	0.59992
AT1G19990	-0.016954	0.683797
AT1G20100	0.263093	0.681965
AT1G20440	-0.779797	1.11746	COR47
AT1G20450	-0.699075	0.746101	ERD10
AT1G20690	#DIV/0!	2.13396
AT1G20693	0.19163	0.725307	HMGB2
AT1G20696	0.257539	0.730619	HMGB3
AT1G20840	0.0804289	0.500786	TMT1
AT1G21000	0.462886	0.520411	PLATZ1
AT1G21130	0.28392	0.513869	IGMT4
AT1G21360	0.868839	1.29033	GLTP2
AT1G21400	0.51435	0.532082
AT1G21450	0.88374	0.598395	SCL1
AT1G21830	0.32434	0.726472
AT1G22070	0.154723	0.755526	TGA3
AT1G22250	-0.0941467	0.59921
AT1G22280	0.135283	0.584456	PAPP2C
AT1G22300	0.475734	0.637439	GRF10
AT1G22490	0.52381	0.582457	BHLH094
AT1G22570	0.206749	0.578922
AT1G22590	-0.235993	0.504257	AGL87
AT1G22630	0.411168	1.16547
AT1G22740	0.129049	0.61905	RABG3B
AT1G22750	-0.123386	0.537812
AT1G22770	0.360014	1.00587	GI
AT1G22885	0.108822	0.643149
AT1G22930	0.174589	0.549031
AT1G22990	-0.819895	1.06739	HIPP22
AT1G23100	-0.714938	0.613721
AT1G23140	0.28816	0.707122	CAR8
AT1G23260	0.383167	0.524187	MMZ1
AT1G23550	0.157361	0.563668	SRO2
AT1G23870	0.635692	0.567911	TPS9
AT1G23960	0.159047	0.51509
AT1G24190	-0.149005	0.523598	SNL3
AT1G24210	-0.136414	0.601919
AT1G24580	0.305591	0.737069
AT1G25275	0.417087	0.654265
AT1G25280	0.241026	0.875601	TLP10
AT1G25400	0.490568	0.623051
AT1G26270	0.469879	0.594561
AT1G26530	-0.766058	0.63561
AT1G26620	-0.107251	0.76631
AT1G26790	1.39121	1.97093	CDF6
AT1G26840	0.194712	0.669994	ORC6
AT1G26945	1.57878	0.617766	KDR
AT1G27020	0.525488	0.732978
AT1G27390	0.83023	0.53002	TOM20-2
AT1G27760	-0.0271805	0.807066	SAT32
AT1G27920	-1.03126	1.32726	MAP65-8
AT1G28230	-0.375706	0.721444	PUP1
AT1G28330	0.852771	0.57378	DYL1
AT1G28600	0.440281	0.505486
AT1G29150	1.09032	0.630011	ATS9
AT1G29250	-0.117983	0.769063	IRP5
AT1G29395	0.0726926	2.44939	COR413IM1
AT1G29400	0.322268	0.632556	ML5
AT1G29418	-0.838124	0.612443
AT1G29420	1.57769	1.09683	SAUR61
AT1G29800	0.883387	0.605485
AT1G29810	-0.049077	0.514618
AT1G29820	-0.0540936	0.638512
AT1G29850	-0.0202491	0.619251	PDCD5
AT1G29950	0.852644	0.588826	SACL3
AT1G30210	0.10928	0.911251	TCP24
AT1G30280	-0.0039979	1.51334	AUXILIN-LIKE7
AT1G30282	2.50992	4.85656
AT1G30320	0.760279	0.885175
AT1G30360	0.381539	0.994696	ERD4
AT1G30475	0.832273	0.974918
AT1G30490	0.348352	0.507029	PHV
AT1G30690	0.0925023	0.940498	PATL4
AT1G30810	0.178103	0.610483	JMJ18
AT1G30820	-0.162908	0.818186	CTPS1
AT1G30900	-0.0452771	0.986374	VSR6
AT1G31040	-0.457867	0.884066	ORE15
AT1G31440	0.564153	0.545701	SH3P1
AT1G31500	1.08915	0.638245	HESP
AT1G31650	0.174597	0.507825	ROPGEF14
AT1G31935	0.422411	0.546891	SORF12
AT1G31940	0.322667	0.567678
AT1G32410	-0.226058	0.512184
AT1G32460	-0.00426617	0.869486
AT1G32520	0.249326	0.522563	OXR4
AT1G32630	0.195465	0.724866
AT1G32700	0.661844	0.619763
AT1G32870	0.737616	0.827411	NAC13
AT1G32920	0.186133	0.657822
AT1G32928	0.676558	0.560708
AT1G33110	0.767563	0.749113
AT1G34000	0.326034	0.614115	OHP2
AT1G34418	-0.35422	0.544285	SORF15
AT1G34760	0.302238	0.74055	GRF11
AT1G34842	0.451998	1.26171
AT1G35720	1.02059	0.89002	ANNAT1
AT1G36370	0.719226	0.529933	MSA1
AT1G36390	0.323698	0.501305	CGE2
AT1G42430	0.462076	0.685206	ESV1
AT1G43160	0.244331	2.71254	RAP2.6
AT1G44760	0.288011	0.653505
AT1G44790	1.08897	0.523342
AT1G44835	-0.0475085	0.549843
AT1G45145	-0.271688	0.627248	TRX5
AT1G45150	-0.260762	0.50119
AT1G46768	0.0908447	0.577154	RAP2.1
AT1G47530	0.204787	0.577899	DTX33
AT1G47710	0.422561	0.520397	SERPIN1
AT1G47740	-0.233022	0.61642
AT1G47970	0.703504	0.735266
AT1G48050	0.823898	0.631212	KU80
AT1G48210	0.204827	0.643729
AT1G49032	-0.203163	0.609946
AT1G49180	0.615281	0.687726
AT1G49200	0.492378	0.618299	ATL75
AT1G49230	0.165023	0.923856	ATL78
AT1G49300	0.283352	0.683799	RABG3E
AT1G49405	1.41346	2.03268	CASPL5C3
AT1G49500	0.993294	1.04041
AT1G49510	0.00520454	0.672658	emb1273
AT1G49720	1.69049	2.0582	ABF1
AT1G49975	0.978049	0.847299
AT1G49990	0.788929	0.599631
AT1G50020	0.660958	0.889606
AT1G50290	0.221499	0.678632
AT1G50600	0.318318	0.601706	SCL5
AT1G50670	0.0214536	0.587387	OTU2
AT1G50732	0.778016	0.803577
AT1G50910	-0.472178	0.572008
AT1G51090	1.06436	1.69573	ATHMAD1
AT1G51380	-1.07921	0.795144
AT1G51950	0.478711	0.659724	IAA18
AT1G51980	0.566102	0.601204
AT1G52200	0.464579	0.986685
AT1G52280	-0.113325	0.810916	RABG3d
AT1G52590	0.531122	0.532348
AT1G53035	0.0220717	1.38047
AT1G53165	0.300279	0.579424	ATMAP4K ALPHA1
AT1G53390	0.459118	0.637051	ABCG24
AT1G53400	0.410716	0.571501
AT1G53440	0.232239	0.761541
AT1G53510	-0.0413619	0.693512	MPK18
AT1G53542	-0.515182	0.621799
AT1G53580	0.0815169	0.603252	GLY3
AT1G53590	0.149667	0.716619	NTMC2T6.1
AT1G53633	-0.0995137	0.506418
AT1G53670	1.0604	0.713048	MSRB1
AT1G53800	0.618722	0.582158
AT1G53887	1.04091	0.737458
AT1G54100	0.0399311	0.558046	ALDH7B4
AT1G54217	0.773976	1.21945
AT1G54270	0.356947	0.617335	EIF4A-2
AT1G54290	0.05308	0.510891
AT1G54410	0.279791	1.00789	HIRD11
AT1G54510	-0.141508	0.501952	NEK1
AT1G54570	0.0760036	0.981935	PES1
AT1G54730	0.684264	0.600811
AT1G55110	0.699276	0.886031	IDD7
AT1G55140	-0.0851557	0.622769	RNC3
AT1G55152	-0.125141	0.567501
AT1G55340	0.300164	0.668213
AT1G55450	0.953653	0.690655
AT1G55490	-0.0672895	0.545137	CPN60B
AT1G56045	1.278	1.05887
AT1G56220	0.790871	0.675862
AT1G56290	0.471606	0.614904
AT1G56423	0.273368	0.500581
AT1G56450	-0.19778	0.612485	PBG1
AT1G56610	-0.25263	0.598034
AT1G56660	1.55608	1.2116
AT1G56700	0.590482	0.623296
AT1G57840	-0.042642	0.70911
AT1G58110	0.747184	0.792954
AT1G58180	1.01448	0.801794	BCA6
AT1G58360	-0.146824	0.671781	AAP1
AT1G58848	0.049185	0.676363
AT1G59218	-0.274433	0.529518	RPP13
AT1G59700	0.686752	0.879956	GSTU16
AT1G60010	0.595459	0.50392
AT1G60140	0.309105	0.561128	TPS10
AT1G60170	0.60738	0.727638	PRP31
AT1G60190	-0.14736	0.737968	PUB19
AT1G60890	-0.00995539	0.610964	PIP5K8
AT1G61240	0.264882	0.513973
AT1G61250	0.858171	0.570666	SC3
AT1G61340	0.252758	0.794712	FBS1
AT1G61580	0.2648	0.574904	RPL3B
AT1G61620	0.836455	0.516573	CSU1
AT1G61690	-0.0780565	0.523993
AT1G61740	-0.00258633	0.764936
AT1G61780	0.597054	0.869843
AT1G61800	1.36892	1.37755	GPT2
AT1G61820	-0.186006	0.564272	BGLU46
AT1G61890	0.898767	1.2699
AT1G61900	0.127589	0.505725
AT1G62300	0.24794	0.919185	WRKY6
AT1G62310	-0.263028	0.506112	JMJ29
AT1G62430	-0.134583	0.623466	CDS1
AT1G62570	0.707086	2.49839	FMO GS-OX4
AT1G62710	-0.947219	0.65938	BETA-VPE
AT1G62720	-0.700241	0.504433	NG1
AT1G62880	0.20898	0.549802
AT1G63180	1.4729	0.88784	UGE3
AT1G63420	-0.333787	0.919744
AT1G63430	0.546105	0.74696
AT1G63670	0.016055	0.576152	TRM12
AT1G63770	-0.0777176	0.523281
AT1G63810	-0.0391896	0.612465
AT1G63880	0.270118	0.502313
AT1G64040	-0.0639043	0.589845	TOPP3
AT1G64220	-0.474778	1.21419	TOM7-2
AT1G64230	0.398673	0.931114	UBC28
AT1G64520	0.325078	0.534022	RPN12a
AT1G64750	0.971577	0.598367	I
AT1G64890	0.402468	0.793938
AT1G64970	-0.589958	0.653494	G-TMT
AT1G65032	-0.0324936	0.584189
AT1G65220	0.485493	0.666217
AT1G65295	-0.0205666	0.529921
AT1G65820	0.0557399	0.802605
AT1G65960	0.697158	0.832212	GAD2
AT1G66060	0.927759	0.865911
AT1G66070	0.514799	0.691094
AT1G66240	0.590205	0.527541	ATX1
AT1G66330	0.440172	0.640302
AT1G66410	-0.0816915	0.621505	CAM4
AT1G66510	0.0412347	0.578402
AT1G66580	-0.475161	0.500822	SAG24
AT1G66590	0.357642	0.669532	COX19-1
AT1G66670	0.706914	0.7297	CLPP3
AT1G66725	1.76687	0.920616	MIR163
AT1G67070	0.195736	0.774655	DIN9
AT1G67195	-0.231592	0.713122	MIR414
AT1G67310	0.373211	0.573806
AT1G67850	0.24859	0.77677
AT1G67920	0.996117	1.02961
AT1G67970	0.224683	0.735298	HSFA8
AT1G68050	1.05443	1.62659	FKF1
AT1G68160	-5.93592e-05	0.533453
AT1G68410	0.31915	0.515315
AT1G68440	0.240545	0.619833
AT1G68500	0.889827	2.00202
AT1G68580	0.577783	0.564978
AT1G68660	0.166221	0.627096	CLPS1
AT1G68670	0.413533	0.577023	HHO2
AT1G69040	0.162017	0.583501	ACR4
AT1G69140	-0.506583	2.33645
AT1G69170	0.335901	0.816868	SPL6
AT1G69360	0.815166	0.515179
AT1G69480	1.27494	1.2599
AT1G69490	1.00976	0.839942	NAP
AT1G69523	-0.100433	0.604509
AT1G69570	0.449894	1.51175	CDF5
AT1G69750	0.411705	0.587312	COX19-2
AT1G69760	-0.00317031	0.60694
AT1G69870	0.425861	1.57428	NPF2.13
AT1G69890	0.313144	0.67213	DUF569
AT1G69980	0.271204	0.555091
AT1G70060	0.0747076	0.581396	SNL4
AT1G70100	0.468862	0.91907
AT1G70420	0.449181	0.553061
AT1G70581	0.114177	0.740013
AT1G70630	-0.0845279	0.528305	RAY1
AT1G70640	1.65543	3.3104
AT1G70700	0.730671	0.812342	TIFY7
AT1G70900	-0.381765	0.690221
AT1G71030	0.41411	0.517275	MYBL2
AT1G71040	0.802388	0.634447	LPR2
AT1G71697	0.65224	0.609575	CK1
AT1G72060	0.0865659	0.886558
AT1G72190	-0.201959	0.571846
AT1G72360	0.249173	0.610187	ERF73
AT1G72416	-0.305507	0.566463
AT1G72630	0.989942	0.797339	ELF4-L2
AT1G72645	0.483765	1.08452
AT1G72710	0.62473	0.621091	CKL2
AT1G72730	0.139179	0.600384
AT1G72770	0.337474	0.6643	HAB1
AT1G73177	1.13377	0.621348	BNS
AT1G73230	0.423495	0.579
AT1G73480	0.506481	0.648962	MAGL4
AT1G73530	0.449782	0.656297	ORRM6
AT1G73650	1.15378	1.2285
AT1G73687	-0.341527	0.876523	MIR159A
AT1G73810	-0.411693	0.892327
AT1G73840	0.0912453	0.55992	ESP1
AT1G74320	0.343853	0.570308	CEK2
AT1G74520	0.669413	0.666626	HVA22A
AT1G74840	0.210326	0.899942
AT1G75190	1.13828	0.664636
AT1G75440	0.341745	0.586986	UBC16
AT1G75770	0.177991	0.583534
AT1G76180	0.606555	0.55501	ERD14
AT1G76580	-0.12597	0.541568
AT1G76590	0.448873	0.981791	PLATZ2
AT1G76600	0.430714	0.561205
AT1G76650	-0.0480042	0.500503	CML38
AT1G76690	1.2839	0.586969	OPR2
AT1G76760	0.405555	0.585861	TY1
AT1G76790	-0.367006	0.540423	IGMT5
AT1G76900	0.279265	0.800938	TLP1
AT1G76930	-0.130302	0.677599	EXT4
AT1G76990	0.0941076	0.58371	ACR3
AT1G77120	0.584253	2.83179	ADH1
AT1G77145	0.189207	0.650503
AT1G77220	0.572554	0.55718	LAZ1H1
AT1G78040	-0.117175	0.539271
AT1G78240	0.204387	0.571541	TSD2
AT1G78290	0.303058	1.35526	SNRK2-8
AT1G78420	0.513145	0.624052	DA2
AT1G78450	-0.667306	1.11842
AT1G78476	-0.784592	0.777569
AT1G78510	0.952502	0.689978	SPS1
AT1G78600	0.421112	0.76487	LZF1
AT1G79075	-0.122966	0.56001	SORF17
AT1G79270	0.569941	0.661553	ECT8
AT1G79410	-0.0853876	0.540451	OCT5
AT1G79660	-0.020959	0.595414
AT1G79700	0.0246031	0.600962	WRI4
AT1G79970	0.102733	0.627843
AT1G80130	-0.314139	1.11453
AT1G80245	1.09762	0.608749
AT1G80840	0.228043	0.601438	WRKY40
AT1G80890	0.124419	0.637114	OEP9.2
AT1G80920	1.25887	0.684593	J8
AT2G01490	0.439248	0.66896	PAHX
AT2G01670	0.571121	0.794866	NUDT17
AT2G01850	0.666021	0.84624	EXGT-A3
AT2G01890	0.321252	0.731812	PAP8
AT2G01940	0.639874	0.571353	SGR5
AT2G02060	0.313899	0.510219
AT2G02080	1.3165	0.69972	IDD4
AT2G02100	0.0477113	1.45852	LCR69
AT2G02370	-0.101674	0.587311
AT2G02410	0.731574	0.577603
AT2G02450	1.48475	0.905006	LOV1
AT2G02800	0.292798	0.745754	APK2B
AT2G02870	0.0456784	0.591475
AT2G03060	0.675034	0.753528	AGL30
AT2G03120	0.0405187	0.510282	SPP
AT2G03620	-0.0635705	0.616707	MGT3
AT2G03710	-0.0598942	0.548566	38231
AT2G04040	-0.107329	1.34796	DTX1
AT2G04160	-0.106518	0.509296	AIR3
AT2G04390	-0.226453	0.524198	DS17
AT2G04410	0.950627	0.50041
AT2G04690	0.161701	0.662737
AT2G05230	-0.419142	0.517743
AT2G05380	0.51479	0.558184	GRP3S
AT2G05518	-0.230796	0.969116
AT2G06002	1.90473	1.14708
AT2G06255	0.335009	1.27088	ELF4-L3
AT2G06530	0.915706	0.585446	VPS2.1
AT2G06850	1.03911	0.654415	XTH4
AT2G06925	-0.269436	0.528138	PLA2-ALPHA
AT2G07042	1.10089	0.544137
AT2G11520	0.25474	0.540934	CRCK3
AT2G11910	-0.0824327	0.503479
AT2G12400	-0.286522	0.510618
AT2G14285	1.07063	0.676627
AT2G15570	0.290189	0.507159	ATHM3
AT2G15695	0.223624	0.524799
AT2G15830	0.00475122	1.2101
AT2G15880	0.425823	0.793435	LRX10
AT2G15890	0.0564064	0.940787	MEE14
AT2G15960	0.746849	1.19283
AT2G15970	0.274832	0.754105	COR413-PM1
AT2G15980	0.156988	0.51106
AT2G16365	0.470511	1.18167	PCH1
AT2G16400	-0.181776	0.560752	BLH7
AT2G16860	0.707437	0.753901	ATSYF2
AT2G16890	-0.0776588	0.881046
AT2G17150	0.450338	0.58152	NLP1
AT2G17360	0.618006	0.565006
AT2G17550	0.50361	0.553587	TRM26
AT2G17730	0.57279	0.625295	NIP2
AT2G17840	0.698677	0.737559	ERD7
AT2G18170	0.602316	0.671331	MPK7
AT2G18680	1.50992	1.37054
AT2G18860	0.0444097	0.609146
AT2G19490	-0.427827	0.522327	RECA2
AT2G19530	0.502444	0.828247
AT2G19740	-0.185593	0.515751
AT2G19800	0.883429	0.802317	MIOX2
AT2G20490	-0.116474	0.607569	NOP10
AT2G20670	0.905626	0.841364
AT2G20724	0.682706	0.908225
AT2G21350	0.510663	0.637547
AT2G21560	-0.164466	0.803861
AT2G21620	0.466948	0.754468	RD2
AT2G21660	0.221297	0.735912	CCR2
AT2G22080	0.671835	1.15819
AT2G22300	1.14197	0.752921	SR1
AT2G22450	-0.226615	0.536445	RIBA2
AT2G22540	0.545014	0.804842	SVP
AT2G22570	0.167208	0.511531	NIC1
AT2G22840	0.701088	0.562429	GRF1
AT2G22980	0.668726	0.51108	SCPL13
AT2G23090	0.72773	0.644609
AT2G23120	-0.458681	0.710769
AT2G23348	-0.230391	0.608861
AT2G23700	-0.173503	0.648611
AT2G23755	0.720603	0.808902
AT2G23760	0.144207	0.640313	BLH4
AT2G23910	0.128106	1.66862
AT2G23930	0.0616519	0.545504	SNRNP-G
AT2G24100	0.013451	0.693961	ASG1
AT2G24755	-0.0378367	1.97386
AT2G24760	0.703944	1.06379
AT2G25070	0.674405	0.672292
AT2G25169	-0.0851134	0.559867
AT2G25210	0.549962	0.595369
AT2G25450	0.566329	0.530089	GSL-OH
AT2G25510	0.908532	0.904139
AT2G25530	1.53582	0.795904
AT2G25690	-0.178784	0.555985
AT2G25920	0.0168093	0.78122
AT2G25930	0.205406	0.532645	ELF3
AT2G25950	-0.109189	0.710973
AT2G26140	-0.228537	0.564926	ftsh4
AT2G26210	0.228843	0.693604
AT2G26240	0.349731	0.500954
AT2G26280	0.805373	0.588732	CID7
AT2G26300	0.20646	0.57151	GP ALPHA 1
AT2G26510	1.49063	0.530565	PDE135
AT2G26560	0.366683	1.29226	PLA2A
AT2G26570	-0.184544	0.594372	WEB1
AT2G26580	-0.115883	0.755484	YAB5
AT2G26692	-0.227183	0.917911
AT2G26710	-0.0797916	0.702233	BAS1
AT2G26970	0.27861	0.511428
AT2G27030	0.216907	0.784312	CAM5
AT2G27395	-0.138023	0.857557
AT2G27400	-0.127856	0.500887	TAS1A
AT2G27490	0.140932	0.680681	ATCOAE
AT2G27500	-0.037041	0.585106
AT2G27830	0.224396	0.539945
AT2G27840	0.0202909	0.86277	HDT4
AT2G27970	-0.143663	0.587621	CKS2
AT2G28305	1.798	1.10224	LOG1
AT2G28510	0.985262	0.828369	DOF2.1
AT2G28540	0.491017	0.504049	NOT4C
AT2G28560	-0.13788	0.754684	RAD51B
AT2G28720	0.168563	0.571023	HTB3
AT2G28900	0.463273	1.13626	OEP16-1
AT2G29065	0.838256	0.586825
AT2G29070	0.0231973	0.92764
AT2G29090	-0.790163	0.930117	CYP707A2
AT2G29180	-0.16531	0.605494
AT2G29450	0.00619409	0.565064	GSTU5
AT2G29490	-0.193954	0.557933	GSTU1
AT2G29540	-0.18585	0.804929	RPC14
AT2G29740	0.48834	0.824928	UGT71C2
AT2G30100	0.417966	0.512209
AT2G30250	0.58074	0.660055	WRKY25
AT2G30860	0.509618	0.643548	GSTF9
AT2G30990	0.272891	0.644626
AT2G31200	0.087086	0.531283	ADF6
AT2G31270	0.220672	0.574794	CDT1A
AT2G31305	-0.321807	0.656438	INH3
AT2G31360	0.943094	1.37726	ADS2
AT2G31380	0.96721	0.849034	STH
AT2G31570	0.273292	0.813603	GPX2
AT2G31580	0.0432314	0.587012	ICA1
AT2G31955	1.39455	0.549905	CNX2
AT2G32060	0.341845	0.509736
AT2G32150	0.537385	0.727752
AT2G32320	0.700281	0.974978	ICA2
AT2G32430	-0.134495	0.605419
AT2G32540	0.805174	0.626293	CSLB04
AT2G32700	1.19084	0.603916	LUH
AT2G32910	0.154119	0.681951
AT2G33370	-0.00483965	0.593481
AT2G33710	0.44776	0.525532
AT2G33830	0.328185	0.862657	DRM2
AT2G34357	0.365743	0.504283
AT2G34900	1.25725	0.581368	IMB1
AT2G34960	-0.0425671	1.05991	CAT5
AT2G35960	0.201785	0.753547	NHL12
AT2G36160	0.592733	0.520011
AT2G36270	-0.364061	0.957618	ABI5
AT2G36290	0.754001	0.649727
AT2G36320	0.413939	0.512392
AT2G36390	0.562354	0.532386	SBE2.1
AT2G36500	0.331072	0.547882
AT2G36750	0.566964	1.1812	UGT73C1
AT2G36890	0.524871	0.642146	RAX2
AT2G37040	0.409385	0.594845	pal1
AT2G37060	0.342487	0.640057	NF-YB8
AT2G37130	-0.0544812	0.57686
AT2G37270	0.158379	0.500371	RPS5B
AT2G37440	0.654122	0.513247
AT2G37510	-0.516118	0.500126
AT2G37540	0.145596	0.816362
AT2G37678	0.23919	1.07119	FHY1
AT2G37940	0.701335	0.55615	AtIPCS2
AT2G37975	0.611108	0.526899
AT2G37990	0.548353	0.518185	ARRS1
AT2G38130	0.414562	0.735095	ATMAK3
AT2G38465	0.575557	0.69722
AT2G39130	0.285393	0.546055
AT2G39170	0.722215	0.631796
AT2G39390	0.227024	0.623676
AT2G39400	1.12997	0.854756	MAGL6
AT2G39518	1.31568	0.560305	CASPL4D2
AT2G39780	0.314488	0.570795	RNS2
AT2G39920	-0.237584	1.76807
AT2G40010	0.480271	0.629434
AT2G40080	0.726624	1.7144	ELF4
AT2G40085	0.332419	0.644805
AT2G40120	0.0317303	0.729004	DYRKP-3
AT2G40205	0.180067	0.581223
AT2G40340	0.71075	2.12637	DREB2C
AT2G40490	0.565616	0.545677	HEME2
AT2G40900	-0.238767	0.549518	UMAMIT11
AT2G40935	0.6766	0.522717
AT2G41430	0.59175	0.534973	ERD15
AT2G42190	0.104792	0.646573
AT2G42520	0.163894	1.02897	RH37
AT2G42530	1.2616	2.982	COR15B
AT2G42540	-0.153814	3.39575	COR15A
AT2G42780	0.0212363	0.595564
AT2G43140	0.929267	0.733561	BHLH129
AT2G43340	0.554032	0.511176
AT2G43350	0.791969	0.550034	GPX3
AT2G43530	0.0184374	1.01682
AT2G43535	-0.113742	1.05397
AT2G43620	0.00452224	1.11753
AT2G43910	0.856298	1.09372	HOL1
AT2G44120	-0.0408977	0.522502
AT2G44180	0.544891	0.796724	MAP2A
AT2G44420	0.266573	0.556383	NTAN1
AT2G44490	0.28539	0.619602	PEN2
AT2G44670	-0.0874238	0.721834
AT2G44798	0.0807605	0.652204
AT2G44860	-0.0603234	0.913806	RPL24C
AT2G44920	1.33925	0.825076
AT2G45170	0.755873	0.869104	ATG8E
AT2G45190	0.64943	0.53396	AFO
AT2G45260	-0.323541	0.535675	CHIQ1
AT2G45450	-0.255566	0.597809	ZPR1
AT2G45500	0.446751	0.551964
AT2G45660	-0.00321215	1.18228	AGL20
AT2G45730	0.099882	0.686334	TRM6
AT2G45820	0.288204	0.725765	Rem1.3
AT2G45860	-0.0195587	0.686341
AT2G46340	0.39968	0.64688	SPA1
AT2G46550	-0.143425	0.519136
AT2G46680	0.38629	0.509462	HB-7
AT2G46790	0.158472	0.527028	PRR9
AT2G46830	0.804746	0.924389	CCA1
AT2G47180	-0.586999	1.1767	GolS1
AT2G47890	-0.222019	0.670456	BBX11
AT3G01200	-1.68866	0.866605	RP2
AT3G01210	-0.1815	0.567982	BPL6
AT3G01390	0.0435303	0.505028	VMA10
AT3G01830	1.49463	0.693636
AT3G01860	-0.267836	0.610603
AT3G02080	0.946415	0.580299
AT3G02320	-0.265479	0.600767	TRM1A
AT3G02555	-0.0504188	0.549172
AT3G02770	0.470962	0.628326
AT3G02800	0.627293	0.530441	PFA-DSP3
AT3G02900	0.0963236	0.563596
AT3G02950	0.911568	0.796862	THO7
AT3G03150	0.260757	1.00042
AT3G03560	1.30798	0.605756
AT3G04010	-0.00604106	0.718738
AT3G04020	0.277166	0.554656
AT3G04060	0.439092	0.650232	NAC046
AT3G04070	1.07397	0.694207	NAC047
AT3G04610	0.268135	0.586202	FLK
AT3G04870	0.200823	0.540031	ZDS
AT3G04910	0.457554	0.632669	WNK1
AT3G05160	0.431655	0.624755
AT3G05165	0.813064	0.641452
AT3G05220	-0.190569	0.566162	ATHMP23
AT3G05370	0.246928	0.525812	RLP31
AT3G05560	0.428275	0.506864
AT3G05660	-0.0844287	0.696628	RLP33
AT3G05670	-0.0851219	0.580077
AT3G05830	0.34027	0.538273	ATNEAP1
AT3G05870	-0.0898432	0.850791	APC11
AT3G05880	0.20973	2.01249	RCI2A
AT3G05935	0.481355	0.541367
AT3G05936	-0.140957	0.769992
AT3G06035	1.3061	0.769257
AT3G06330	0.169835	0.687871
AT3G06440	0.433196	0.566422	GALT3
AT3G06500	-0.0759202	0.618519	A/N-InvC
AT3G06530	-0.0274447	0.58564
AT3G07230	0.587645	0.661988
AT3G07640	0.15004	0.757257	PBAC5
AT3G07650	0.920671	1.88073	COL9
AT3G07700	0.562108	0.552313	SIA1
AT3G07720	-0.214141	0.891358
AT3G08000	1.33671	0.512487
AT3G08510	0.440715	0.630011	PLC2
AT3G08520	0.653645	0.57364
AT3G09390	0.620836	0.779793	MT2A
AT3G09590	0.385739	0.552456
AT3G09600	0.432088	0.527163	RVE8
AT3G09760	0.85842	0.568529
AT3G10090	0.0782733	0.527426
AT3G10120	0.759474	0.791454
AT3G10250	0.512767	0.519977
AT3G10640	0.109265	0.628092	VPS60.1
AT3G10980	0.333754	0.652291
AT3G11020	1.10866	1.22484	DREB2B
AT3G11050	0.255506	0.951885	FER2
AT3G11120	-0.14242	0.649838
AT3G11210	0.145636	0.5167
AT3G11230	0.529219	0.718826
AT3G11440	0.42951	0.612546	MYB65
AT3G11580	0.307243	0.69512	NGAL2
AT3G12130	0.592196	0.675693	KHZ1
AT3G12300	-0.112762	0.579917	BUG22
AT3G12320	0.420289	0.594271	LNK3
AT3G12390	0.583436	0.776808
AT3G12502	-1.2816	0.994046
AT3G12965	-0.130115	0.926363	SORF23
AT3G13230	0.00260245	0.717597
AT3G13240	0.457166	0.528386
AT3G13570	0.799796	0.670507	SCL30A
AT3G13750	0.48985	0.815573	BGAL1
AT3G13790	0.650942	0.518349	ATBFRUCT1
AT3G13810	0.0642782	0.927777	IDD11
AT3G14172	0.123988	0.644324
AT3G14185	-0.201598	1.19782
AT3G14280	0.768477	0.588365
AT3G14560	0.21124	0.825735
AT3G14690	0.424601	0.572076	CYP72A15
AT3G14770	0.660753	0.827217	SWEET2
AT3G14890	0.781266	0.665128	ZDP
AT3G14990	0.768641	0.597728	DJ1A
AT3G15351	0.628162	0.597843
AT3G15450	1.4098	0.872804
AT3G15460	0.450703	0.834231	ATBRX1-1
AT3G15500	0.715462	0.874833	NAC3
AT3G15630	0.971999	0.834966
AT3G15660	-0.123514	0.534111	GRX4
AT3G15730	-0.277786	0.61152	PLDALPHA1
AT3G15750	-0.334862	0.568087
AT3G16100	0.198826	0.657657	RABG3c
AT3G16220	0.604752	0.512941
AT3G16560	0.361245	0.664517
AT3G16690	-0.116778	0.600535	SWEET16
AT3G16800	0.244425	0.589663	EGR3
AT3G17410	0.524452	0.544962	CARK1
AT3G17510	0.822749	0.60688	CIPK1
AT3G17860	-0.0276017	0.74299	JAZ3
AT3G18640	0.147233	0.940363
AT3G18780	0.180989	0.581364	ACT2
AT3G19010	0.205144	0.590301	2-OXOGLUTARATE OXYGENASE
AT3G19290	0.477852	0.747125	ABF4
AT3G19450	1.02643	0.849003	ATCAD4
AT3G19660	1.15969	0.7541
AT3G19930	0.565768	0.626762	STP4
AT3G20240	0.0805384	0.509056
AT3G20250	0.0183049	0.757173	PUM5
AT3G20340	0.604488	0.566936
AT3G20440	0.265093	0.516781	EMB2729
AT3G20510	-0.0822683	0.500515	FAX6
AT3G20620	0.380563	0.531461
AT3G20770	0.534955	0.958808	EIN3
AT3G21160	0.983825	0.509406	MNS2
AT3G21420	1.4864	0.98787	LBO1
AT3G21510	-0.362787	0.771285	AHP1
AT3G21560	0.393767	0.926429	UGT84A2
AT3G21760	0.489524	0.719252	HYR1
AT3G21870	-0.044138	0.530651	CYCP2;1
AT3G22110	0.461606	0.548284	PAC1
AT3G22121	-0.76448	1.20221
AT3G22210	-0.283412	0.969866
AT3G22320	0.0519958	0.546386	NRPB5
AT3G22470	1.77677	0.615504	PPR3
AT3G22660	0.037635	0.508838	EBP2
AT3G22830	0.521834	0.772791	HSFA6B
AT3G22840	0.0273077	1.78662	ELIP1
AT3G22886	0.19006	0.914312	MIR167A
AT3G22950	0.321907	0.522527	ARFC1
AT3G23030	0.0343159	0.602747	IAA2
AT3G23325	1.03248	0.614035
AT3G23510	0.416961	0.769455
AT3G23530	0.581566	1.30151
AT3G23540	0.124432	0.617649
AT3G23830	-0.149597	0.664519	RBGA4
AT3G24190	0.4128	0.519121
AT3G24420	0.354009	0.849396	DLK2
AT3G24520	-0.400129	1.15054	HSFC1
AT3G24630	0.690113	0.669047	TRM34
AT3G24730	0.926367	0.548189
AT3G24740	0.302587	0.585941
AT3G24820	0.786446	0.577822
AT3G24840	-0.037512	0.556742
AT3G24890	-0.00701622	0.529761	VAMP728
AT3G25070	0.285305	0.774302	RIN4
AT3G25545	-0.120643	0.576907	PBAC1
AT3G25610	0.796731	0.589952	ALA10
AT3G25717	0.277562	0.712912	RTFL16
AT3G25740	0.368806	0.541973	MAP1B
AT3G25940	0.744491	0.786171
AT3G26000	0.273779	0.555885	RIFP1
AT3G26060	0.0305598	0.5641	PRXQ
AT3G26090	-0.0965352	0.693119	RGS1
AT3G26612	0.287963	0.580309	SORF28
AT3G26680	0.606149	0.603727	SNM1
AT3G26690	0.493941	0.615019	NUDX13
AT3G26740	0.801543	0.661536	CCL
AT3G26980	0.729318	0.509161	MUB4
AT3G27080	0.613705	0.503121	TOM20-3
AT3G27210	0.292837	1.1878
AT3G27290	-0.0611724	0.994461
AT3G27300	0.652759	0.785548	G6PD5
AT3G27325	-0.0642469	0.507046
AT3G27350	0.507198	0.533196
AT3G27380	-0.0060854	0.516814	SDH2-1
AT3G27390	0.0445939	0.766918
AT3G27430	0.400422	0.544285	PBB1
AT3G27940	0.137557	0.664961	LBD26
AT3G28160	1.35931	0.670506
AT3G28210	-0.186803	0.807474	PMZ
AT3G28220	-0.633969	0.618715
AT3G28370	0.00448209	0.595614
AT3G28740	-0.418737	1.15845	CYP81D11
AT3G28910	0.603053	0.610952	MYB30
AT3G28970	-0.0117498	0.635221	AAR3
AT3G29034	0.238896	0.812076
AT3G29130	-0.10048	0.631208
AT3G29185	0.270228	0.535456	BFA1
AT3G29270	0.441431	0.839862
AT3G29350	0.198748	0.550756	AHP2
AT3G29575	1.25919	0.793098	AFP3
AT3G29760	-0.499317	0.676107
AT3G30180	0.284852	0.551185	BR6OX2
AT3G30460	-0.103012	0.86342
AT3G30775	0.628086	0.553921	ERD5
AT3G42790	0.286848	0.782348	AL3
AT3G43590	0.361966	0.642432
AT3G43810	1.11867	0.686837	CAM7
AT3G43850	0.510677	0.846159
AT3G44010	1.32629	0.861383
AT3G44020	0.654485	0.637575
AT3G44100	0.545278	0.734662
AT3G44160	0.608343	0.608484	P39
AT3G44450	0.235026	1.02262	BIC2
AT3G44680	-0.0128363	0.779727	HDA9
AT3G44750	-0.081246	0.726449	HDA3
AT3G44890	0.495376	0.548577	RPL9
AT3G44970	-0.828195	0.630555
AT3G45010	-0.399086	0.504494	scpl48
AT3G45050	1.29582	0.738861
AT3G45190	0.21498	0.551001
AT3G45260	0.0463741	0.74933	BIB
AT3G45300	0.639501	0.601892	IVD
AT3G45638	0.0919706	0.701267
AT3G45980	0.684324	0.502308	HTB9
AT3G46460	-0.0194932	0.600856	UBC13
AT3G46640	0.792701	0.767479	PCL1
AT3G46830	-0.0101412	0.600047	RABA2c
AT3G47160	0.40183	0.85972
AT3G47295	-0.212206	0.641114
AT3G47420	0.575095	0.855727	G3Pp1
AT3G47480	0.755341	0.540495	CML47
AT3G47500	-0.0335855	0.581839	CDF3
AT3G47650	0.41611	0.736007	BSD2
AT3G47680	0.154062	0.662628
AT3G47800	0.435825	0.976795
AT3G48100	0.39182	0.88553	RR5
AT3G48140	0.208945	0.524799
AT3G48160	0.145877	0.605434	DEL1
AT3G48360	1.01555	0.825225	bt2
AT3G48530	0.552919	0.699421	KING1
AT3G48760	-0.213465	0.553973
AT3G48890	0.406096	0.521026	MAPR3
AT3G48930	0.380631	0.620594	EMB1080
AT3G49010	0.462628	0.544279	BBC1
AT3G49050	0.711058	0.561705
AT3G49120	1.05814	0.854086	PRXCB
AT3G49210	0.450985	1.05018	WSD6
AT3G49290	0.396854	0.606364	ABIL2
AT3G49320	0.05315	0.702357
AT3G49420	0.130428	0.502806
AT3G49590	0.350236	0.502061	ATG13
AT3G49744	#DIV/0!	1.19615
AT3G49780	-0.139856	0.600427	PSK4
AT3G50360	0.582429	0.725101	CEN2
AT3G50500	0.33707	0.609208	SNRK2.2
AT3G50550	-0.289112	0.524612
AT3G50700	0.037929	0.533103	IDD2
AT3G50900	0.201052	0.672869
AT3G50910	0.749198	0.501981
AT3G50970	-0.29286	2.90766	LTI30
AT3G50980	-0.274949	2.19537	XERO1
AT3G51180	0.35078	0.565762
AT3G51238	0.128325	0.508739
AT3G51240	0.900198	0.574574	F3H
AT3G51325	-0.446643	0.695589
AT3G51390	0.370894	0.594211	PAT10
AT3G51400	1.39421	1.07902
AT3G51660	0.596669	1.69504
AT3G51840	0.387463	0.571632	ACX4
AT3G51880	-0.122706	0.509156	HMGB1
AT3G52110	-0.228571	0.606695
AT3G52450	0.551999	0.614403	PUB22
AT3G52840	0.299809	1.06265	BGAL2
AT3G53020	0.999387	0.710082	STV1
AT3G53090	0.735846	0.556127	UPL7
AT3G53270	-0.142947	0.65672
AT3G53500	0.134303	0.612872	RS2Z32
AT3G53530	-0.373778	0.505528	NAKR3
AT3G53620	0.182952	0.68266	PPa4
AT3G53960	-0.266964	0.588769
AT3G53990	0.52672	0.608231	ATUSP
AT3G54140	-0.0667942	0.681569	NPF8.1
AT3G54150	0.32624	0.565647	EFD
AT3G54480	0.172854	0.514547	SKIP5
AT3G54540	0.399931	0.573698	ABCF4
AT3G54710	0.104762	0.573828	CDT1B
AT3G54880	0.664542	0.593703
AT3G54990	0.57795	0.612918	SMZ
AT3G55120	-0.294577	0.610314	TT5
AT3G55450	0.118073	0.658334	PBL1
AT3G55485	1.17264	0.954068
AT3G55510	-0.240783	0.511144	RBL
AT3G55520	-0.0173716	0.659043
AT3G55580	0.371803	1.75998	TCF1
AT3G55610	0.640743	1.09654	P5CS2
AT3G55750	-0.207273	0.722331
AT3G55770	0.454142	0.558575	WLIM2b
AT3G55830	0.577872	0.547329	EPC1
AT3G55880	-0.138828	0.627668	SUE4
AT3G55940	0.593093	1.52894	PLC7
AT3G56010	-0.00246182	0.506057
AT3G56020	0.950177	0.581629
AT3G56090	0.0448771	0.633631	FER3
AT3G56240	-0.0714102	0.771458	CCH
AT3G56260	-0.0523315	0.546294
AT3G56290	0.156007	0.760925
AT3G56710	1.49224	0.621118	SIB1
AT3G56790	0.121653	2.44359
AT3G57020	0.590767	0.618799
AT3G57040	0.468905	0.713205	ARR9
AT3G57390	0.354455	0.66688	AGL18
AT3G57760	-0.218053	0.851057	ZRK6
AT3G57930	0.300669	0.679667
AT3G57940	-0.532706	0.601106
AT3G58730	0.245121	0.51059	VHA-D
AT3G59350	0.736416	0.725768
AT3G59500	-0.242023	0.516981
AT3G59820	0.359942	0.838871	LETM1
AT3G60520	-0.0422488	1.04438
AT3G60640	1.4604	0.739549	ATG8G
AT3G61060	0.131704	0.662962	PP2-A13
AT3G61070	0.38414	0.607231	PEX11E
AT3G61110	-0.204199	0.682004	RS27A
AT3G61220	0.625882	0.62771	SDR1
AT3G61260	0.00101633	0.527825	REM1.2
AT3G61350	0.300696	0.504094	SKIP4
AT3G61700	0.212261	0.505076
AT3G61850	0.477297	0.801255	DAG1
AT3G61890	0.171212	0.555849	HB-12
AT3G61900	-0.0494049	0.613158	SAUR33
AT3G62550	0.510736	1.52245
AT3G62840	-0.0100968	0.596218
AT3G62920	0.642316	0.510122
AT3G63010	0.748842	0.599556	GID1B
AT3G66654	0.407475	0.621104	CYP21-4
AT4G00200	1.88622	0.615974	AHL7
AT4G00420	0.172708	0.787439
AT4G01120	1.10474	0.77162	GBF2
AT4G01720	0.332625	0.887841	WRKY47
AT4G01895	1.1131	1.36417
AT4G01960	0.532281	0.579432
AT4G02520	0.481	0.783868	GSTF2
AT4G02620	0.0644276	0.654321	VHA-F
AT4G02710	0.175976	0.637182	NET1C
AT4G03020	0.641916	0.604528
AT4G03180	0.4471	0.512154
AT4G03420	0.135461	0.594361
AT4G03510	0.211351	0.569646	RMA1
AT4G04320	0.5691	0.504267
AT4G04330	0.591041	1.36616	RbcX1
AT4G04620	0.231142	0.565885	ATG8B
AT4G04770	-0.0591914	0.557115	ABCI8
AT4G04790	-0.190109	0.598154
AT4G04800	0.244405	0.53813	MSRB3
AT4G05000	-0.156063	0.586607	VPS28-2
AT4G05049	0.568251	0.885167
AT4G05070	0.444951	0.569015	WIP2
AT4G05120	-0.606588	0.508205	FUR1
AT4G05520	1.29186	0.629119	EHD2
AT4G06676	0.278093	0.625535
AT4G06746	-0.819085	0.78	RAP2.9
AT4G08150	0.531822	0.570325	KNAT1
AT4G08230	-0.0668761	0.886354
AT4G08390	0.577989	0.527405	SAPX
AT4G08520	0.0197888	0.715848
AT4G08540	0.293626	0.546088	ATG14B
AT4G08555	1.2326	1.59045
AT4G08980	0.55129	0.713	FBW2
AT4G09060	-0.52338	0.672629
AT4G09320	0.357696	0.9461	NDPK1
AT4G09560	0.421369	0.572974	RMR4
AT4G09750	-0.0355588	0.728225
AT4G09800	1.04916	0.736804	RPS18C
AT4G10140	0.326634	0.832735
AT4G10170	0.964293	0.57892
AT4G10450	-0.044741	0.522094
AT4G10955	1.50992	2.30834
AT4G11080	0.157011	0.659143	3xHMG-box1
AT4G11120	-0.23652	0.519393
AT4G11150	0.336717	0.518523	TUF
AT4G11330	0.173873	0.974996	MPK5
AT4G11360	0.0280301	0.556199	RHA1B
AT4G11370	0.263864	0.554817	RHA1A
AT4G11600	0.243985	0.624242	GPX6
AT4G11800	0.385142	0.50937
AT4G11820	0.274109	0.541461	HMGS
AT4G11970	0.198745	0.686806
AT4G12000	-0.0744057	0.861118
AT4G12120	-0.223275	0.527385	SEC1B
AT4G12470	-0.465997	1.00307	AZI1
AT4G12480	0.149361	0.827895	EARLI1
AT4G12600	0.794837	0.834882
AT4G12760	0.00610324	0.791828
AT4G12830	1.05888	0.918766
AT4G12910	-0.5604	0.698941	scpl20
AT4G12970	0.886938	1.00123	STOMAGEN
AT4G13160	0.360414	0.581839
AT4G13180	-0.0714819	0.722666
AT4G13250	0.564713	0.809008	NYC1
AT4G13400	1.41227	0.585808
AT4G13500	0.122847	0.979433
AT4G13590	0.989273	0.559953	CMT1
AT4G13630	0.149953	0.529137	MYOB13
AT4G13850	0.269587	0.851682	RBGA5
AT4G14320	0.193853	0.828805	RPL36AB
AT4G14342	0.738382	0.744526
AT4G14455	0.33326	0.620152	ATBET12
AT4G14548	0.370103	0.835355
AT4G14550	0.103318	0.689253	IAA14
AT4G14560	-0.214051	0.623177	IAA1
AT4G14690	1.36544	1.86535	ELIP2
AT4G14695	0.876613	2.31838	MPC2
AT4G14990	0.336162	0.521607	PAT1H2
AT4G15010	0.237071	0.656056
AT4G15090	0.337468	0.531091	FAR1
AT4G15130	0.0299327	0.792649	CCT2
AT4G15430	0.998565	1.0907
AT4G15450	0.0781915	1.1858
AT4G15480	1.25428	0.87538	UGT84A1
AT4G15530	0.844605	0.785413	PPDK
AT4G15610	0.571407	0.614236	CASPL1D1
AT4G15630	0.482649	0.883437	CASPL1E1
AT4G16146	0.537448	1.71827
AT4G16265	0.0635564	0.540069	NRPB9B
AT4G16845	-0.121867	0.542903	VRN2
AT4G17090	-0.0475562	0.734816	CT-BMY
AT4G17098	0.0158439	0.564861
AT4G17530	0.352255	0.638511	RAB1C
AT4G17550	0.342495	0.68511	G3Pp4
AT4G17570	1.72136	0.640431	GATA26
AT4G17670	0.270954	1.56843
AT4G17900	0.346176	0.975693	PLATZ11
AT4G17960	0.587885	0.599284
AT4G18070	-0.177495	0.538158
AT4G18100	1.07472	0.546848
AT4G18120	-0.182099	0.543381	ML3
AT4G18140	0.620844	0.536238	SSP4b
AT4G18170	0.111791	0.631409	WRKY28
AT4G18375	-0.248589	0.593309
AT4G18400	-0.0527954	0.657501
AT4G18422	0.173186	1.80647
AT4G18530	-0.373796	0.706334	SGC
AT4G18590	0.017933	0.50338	RPA3B
AT4G18650	0.713	2.12945	DOGL4
AT4G18710	0.272014	0.597403	BIN2
AT4G18810	-0.202809	0.536582
AT4G19110	#DIV/0!	#DIV/0!
AT4G19210	-0.0381078	0.653669	ABCE2
AT4G19410	0.685999	0.990831	PAE7
AT4G19650	-0.27151	0.620115	MTERF26
AT4G19960	1.05461	0.769973	KUP9
AT4G20070	0.462536	0.828082	AAH
AT4G20260	1.28362	1.24853	PCAP1
AT4G20870	-0.150072	0.509068	FAH2
AT4G20890	0.0708751	0.500526	TUB9
AT4G21105	0.0537938	0.524347
AT4G21190	0.829711	0.716143	emb1417
AT4G21192	0.0277549	0.561919
AT4G21215	-0.0856207	1.24849
AT4G21220	-0.527686	0.53375	LPXD2
AT4G21445	0.396041	0.763947	CRR9
AT4G21570	1.08275	0.655023
AT4G21900	-0.171396	0.568856	PRORP3
AT4G21920	0.630105	1.05064
AT4G21980	0.231097	0.519507	APG8A
AT4G21990	0.708499	0.917548	37712
AT4G22150	1.02896	0.517297	PUX3
AT4G22380	0.519274	0.532611
AT4G22780	0.0879904	0.91021	ACR7
AT4G23010	-0.03029	0.516112	UTR2
AT4G23450	1.41281	1.11877	AIRP1
AT4G23460	0.298869	0.613061
AT4G23630	0.299333	0.648921	BTI1
AT4G23710	0.166746	0.502634	VAG2
AT4G23910	0.601397	0.572152	UIEF2
AT4G24040	0.767751	0.557689	TRE1
AT4G24120	0.26496	0.681845	YSL1
AT4G24350	-0.156048	0.588076
AT4G24400	0.677219	0.552118	CIPK8
AT4G24415	-0.0120209	1.63669	MIR824A
AT4G24960	0.242536	1.14693	HVA22D
AT4G25360	0.501813	0.557012	TBL18
AT4G25433	1.14779	2.77037
AT4G25470	1.4835	1.03082	CBF2
AT4G25480	1.60592	1.15975	DREB1A
AT4G25490	1.28113	1.07026	CBF1
AT4G25500	0.389606	0.954027	RS40
AT4G25740	0.459434	0.6285
AT4G25830	1.13816	0.710737	CASPL2C1
AT4G26150	0.771167	0.67526	CGA1
AT4G26230	0.213045	0.58064
AT4G26288	-0.150062	0.779392
AT4G26610	0.0921977	0.523626	D6PKL1
AT4G27040	0.229736	0.514346	VPS22
AT4G27360	3.05594	2.05588
AT4G27560	-0.0540865	1.00602	UGT79B2
AT4G27740	0.651177	0.534437
AT4G27820	0.448765	0.906198	BGLU9
AT4G27830	0.426694	1.11002	BGLU10
AT4G27960	0.39014	0.56574	UBC9
AT4G28025	0.471913	0.721597
AT4G28040	0.782341	0.620376	UMAMIT33
AT4G28820	-0.477297	0.510325
AT4G29905	0.31743	0.541644
AT4G30200	0.38204	0.765563	VEL1
AT4G30270	1.42187	0.686867	XTH24
AT4G30360	0.620222	0.556576	CNGC17
AT4G30530	0.394541	0.61046	GGP1
AT4G30580	0.566467	0.545422	ATS2
AT4G30650	1.54006	2.23725
AT4G30830	-0.320846	1.90298
AT4G30935	0.633816	0.513842	WRKY32
AT4G31450	-0.285134	0.795946	CTL09
AT4G31510	0.34768	0.525461
AT4G31700	-0.260577	0.543462	RPS6
AT4G31790	-0.539643	0.512575
AT4G31800	0.436097	1.16121	WRKY18
AT4G31820	0.433687	0.534688	ENP
AT4G31860	0.0850358	0.626089
AT4G31870	1.15892	1.15028	GPX7
AT4G31877	0.360896	0.650546	MIR156C
AT4G32190	0.560698	1.07879	PII1
AT4G32340	1.06142	0.735167
AT4G32480	0.166474	0.724367
AT4G32720	0.136266	0.524873	La1
AT4G32790	0.413672	0.758284
AT4G32900	-0.18349	0.533122
AT4G32940	0.454531	0.775968	GAMMA-VPE
AT4G33070	0.618381	1.10859	PDC1
AT4G33100	0.0225614	0.656126
AT4G33430	0.22765	0.59046	BAK1
AT4G33465	0.100356	1.70283	SCRL22
AT4G33467	0.403647	1.80222
AT4G33470	1.18861	0.710971	hda14
AT4G33540	0.514261	0.613096
AT4G33740	0.00888596	0.635886
AT4G33865	0.200347	0.654561
AT4G33980	0.580375	1.30308	COR28
AT4G34280	0.0917695	0.532773	DHU1
AT4G34360	0.110636	0.57317
AT4G34550	0.415087	1.60665
AT4G34610	-0.13135	0.545425	BLH6
AT4G34650	-0.784358	0.653587	SQS2
AT4G34670	0.835197	0.531379
AT4G34950	0.48032	0.573846	MFS1
AT4G34990	-0.529753	0.620003	MYB32
AT4G35060	-0.0965472	0.518931	HIPP25
AT4G35300	-0.199891	0.692621	TMT2
AT4G35480	0.7128	0.504911	RHA3B
AT4G35500	0.993842	0.602779
AT4G35510	0.41828	0.532264
AT4G35570	0.489865	0.74355	HMGB5
AT4G35750	0.219478	0.57857
AT4G35770	0.412358	0.651854	SEN1
AT4G35900	-0.171423	0.506362	FD
AT4G35980	0.855832	0.503284
AT4G36010	1.47114	0.696423
AT4G36040	0.762865	0.5536	J11
AT4G36090	0.614412	0.580594	ALKBH9C
AT4G36400	1.33365	0.75053	D2HGDH
AT4G36410	0.873636	0.60869	UBC17
AT4G36470	-0.577054	0.648725
AT4G36500	0.668012	1.18604
AT4G36730	0.316183	0.614046	GBF1
AT4G36860	0.870325	0.871057	DAR1
AT4G37090	-0.00960325	0.50889
AT4G37120	0.532711	0.573168	SMP2
AT4G37150	1.34011	0.532915	MES9
AT4G37440	0.417182	0.557515
AT4G37553	-0.153713	0.541483
AT4G37590	0.664163	0.78111	NPY5
AT4G37610	0.939702	0.84776	bt5
AT4G37680	0.717489	0.639456	HHP4
AT4G37685	-0.221005	0.942768
AT4G37790	0.835859	0.541017	HAT22
AT4G37880	0.0356345	0.559032
AT4G37895	0.506276	1.22939
AT4G37920	-0.195416	0.681842
AT4G38580	0.331782	1.62415	FP6
AT4G38980	0.0059489	0.538464
AT4G39070	0.680427	1.16355	BZS1
AT4G39380	0.20628	0.512973
AT4G39530	-0.530446	0.50014
AT4G39540	-0.155299	0.530794	SK2
AT4G39740	-0.157054	0.647733	HCC2
AT5G01215	-0.26688	0.570722
AT5G01520	0.025224	1.13382	AIRP2
AT5G01570	0.709314	0.594149
AT5G01810	0.190908	0.554472	CIPK15
AT5G02020	-0.0821841	0.504381	SIS
AT5G02270	0.447939	0.735218	ABCI20
AT5G02290	1.15742	0.739985	NAK
AT5G02450	0.710051	0.706145
AT5G02502	0.327079	0.596893
AT5G02940	0.623056	0.738736
AT5G03240	0.586723	0.553414	UBQ3
AT5G03320	0.142369	0.569741	PCRK2
AT5G03330	0.558369	0.681995
AT5G03345	0.84831	0.67689	PRCE2
AT5G03520	0.546596	0.538137	RAB8C
AT5G03668	-0.236035	1.03092
AT5G03905	0.0032978	0.521024
AT5G04000	-0.166658	1.13592
AT5G04220	0.268038	0.614969	SYTC
AT5G04250	0.528556	0.77967
AT5G04770	0.553053	0.500292	CAT6
AT5G04980	0.622334	0.769353
AT5G05210	0.834924	0.967637
AT5G05270	1.24008	1.78433	CHIL
AT5G05410	0.731123	0.988733	DREB2A
AT5G06100	1.0946	0.658868	MYB33
AT5G06300	-0.00964178	0.782544	LOG7
AT5G06450	0.395609	0.548528	RICE2
AT5G06550	-0.211224	0.554755	JMJ22
AT5G06690	-0.121287	0.567547	WCRKC1
AT5G06780	0.0561742	0.60244	EML2
AT5G06865	4.41688	1.71449
AT5G06910	0.0904062	0.518166	ATJ6
AT5G07100	0.665494	0.531164	WRKY26
AT5G07290	0.30296	0.619795	ML4
AT5G07370	-0.129114	0.744793	IPK2a
AT5G07620	0.333182	0.656449
AT5G07830	-0.247671	0.711028	GUS2
AT5G08335	0.111756	0.527839	ATSTE14B
AT5G08380	-0.360332	0.821516	AGAL1
AT5G08640	0.257231	0.579487	FLS1
AT5G08750	0.669965	0.504634
AT5G09260	0.387832	0.571803	VPS20.2
AT5G09830	0.281197	0.555614	BOLA2
AT5G09920	-0.0252351	0.676364	NRPB4
AT5G09930	0.590325	0.778531	ABCF2
AT5G09960	0.233716	0.869343
AT5G10030	-0.165779	0.502941	TGA4
AT5G10410	0.0810752	0.728254	PICALM10B
AT5G10630	0.159518	0.530077	HBS1
AT5G10860	0.609221	0.939332	CBSX3
AT5G10946	0.117033	0.766958
AT5G10950	0.507774	0.532888
AT5G11020	0.0105047	0.593675
AT5G11070	0.222636	0.968568
AT5G11450	0.70366	0.552819	PPD5
AT5G11680	0.422758	0.734835
AT5G11740	-0.0907052	0.554842	AGP15
AT5G12140	0.333568	0.867596	CYS1
AT5G12300	0.853411	0.813857
AT5G12850	0.489551	0.535613	TZF8
AT5G13110	0.559174	0.608749	G6PD2
AT5G13210	-0.142312	1.02504
AT5G13370	0.677538	0.559512	GH3.15
AT5G13710	0.862185	0.662533	SMT1
AT5G13730	-0.448159	0.509549	SIG4
AT5G13750	-0.122033	1.19073	ZIFL1
AT5G13820	-0.136536	0.855027	TBP1
AT5G13930	1.14486	1.28378	TT4
AT5G14360	-0.0160021	1.15724
AT5G14410	0.349799	0.538827
AT5G14565	-0.289345	1.42481	MIR398C
AT5G14640	-0.113722	0.696022	SK13
AT5G14760	0.532073	0.534899	AO
AT5G14940	0.54268	0.575933
AT5G15022	0.148959	0.957651
AT5G15080	1.12929	0.562639	PBL34
AT5G15190	0.686526	0.664341
AT5G15750	-0.111631	0.904647
AT5G15802	0.188822	0.549948	HCF222
AT5G15960	0.604203	3.98744	KIN1
AT5G15970	-0.481756	2.07331	KIN2
AT5G16140	0.291204	0.691752
AT5G16230	-0.0345944	0.535647	AAD3
AT5G16630	0.0813421	0.588429	RAD4
AT5G16650	0.443383	0.504998
AT5G16660	0.445591	0.641406
AT5G16790	0.0690229	0.518517	THO7
AT5G16980	-0.034593	0.658922
AT5G17040	0.927646	0.902222
AT5G17230	0.644029	0.575865	PSY
AT5G17300	0.942216	0.65992	RVE1
AT5G17460	-0.162694	1.75679	DFR1
AT5G17550	0.281505	0.551681	PEX19-2
AT5G17760	0.524725	0.516427
AT5G17780	0.055206	0.704673
AT5G18130	-0.198442	0.531985
AT5G18255	0.737075	0.551294
AT5G18290	-0.0611565	0.919223	SIP1;2
AT5G18310	0.59185	0.629105
AT5G18400	-0.0649019	0.535136	DRE2
AT5G18670	0.893383	0.57464	BMY3
AT5G18760	0.364887	0.508629
AT5G19320	-0.236095	0.612209	RANGAP2
AT5G19440	0.592588	0.550395
AT5G19875	-0.475608	0.622233
AT5G20150	1.05559	0.542074	SPX1
AT5G20165	-0.0468513	0.629518
AT5G20230	0.692375	0.597121	BCB
AT5G20630	0.62157	0.777639	GER3
AT5G20790	-0.0958893	0.740875
AT5G20830	0.416384	3.0506	SUS1
AT5G20910	0.743755	0.712982	AIP2
AT5G20960	0.230251	0.583343	AO1
AT5G21090	0.191265	0.541198
AT5G21940	0.631721	0.521967
AT5G22050	0.127151	0.558619
AT5G22130	0.0419302	0.515664	PNT1
AT5G22210	-0.239423	0.721017
AT5G22270	0.836293	1.00276	SIED1
AT5G22300	0.0142934	1.9902	NIT4
AT5G22310	1.22648	0.713242
AT5G22320	1.15082	0.530524
AT5G22480	0.126151	0.609322
AT5G22650	0.177792	0.587216	HD2B
AT5G22788	1.63731	0.917818
AT5G23090	0.40588	0.620521	NF-YB13
AT5G23350	0.165781	0.706947
AT5G23760	0.202802	1.03402
AT5G23930	-0.317746	0.506246	MTERF34
AT5G24120	0.633231	0.607556	SIGE
AT5G24470	1.03925	1.63176	PRR5
AT5G24490	0.762721	0.683291
AT5G24530	0.166223	0.525147	DMR6
AT5G24735	0.525781	0.619698	SORF31
AT5G24840	-0.0109983	0.804732	TRM8A
AT5G24850	0.41955	0.663478	CRY3
AT5G24890	0.240743	0.616346
AT5G25110	-0.339413	1.01517	CIPK25
AT5G25120	-0.0197705	0.71537	CYP71B11
AT5G25210	0.885044	0.687967
AT5G25820	0.708476	0.537294
AT5G25890	-0.358399	0.734781	IAA28
AT5G26010	0.63899	1.0968
AT5G26340	0.261829	1.13835	MSS1
AT5G26667	0.899861	0.865327	PYR6
AT5G26749	-0.364685	0.557785
AT5G26770	0.0942906	0.550225	ATNEAP2
AT5G26940	0.23706	0.527358	DPD1
AT5G27560	0.21758	0.555512
AT5G27640	0.1713	0.528839	TIF3B1
AT5G27700	0.358389	0.639358	EVR1L1
AT5G27720	0.164004	0.545678	emb1644
AT5G27760	1.21566	0.866711	ATHIGD2
AT5G27820	-0.00730778	0.58714	UL18M
AT5G27930	0.667016	1.33839	EGR2
AT5G28060	0.140472	0.509196	RPS24B
AT5G28770	0.962972	0.793477	BZO2H3
AT5G30495	0.820718	0.580679
AT5G33290	0.773302	0.98809	XGD1
AT5G35330	-0.014412	0.663808	MBD02
AT5G35560	-0.0431195	0.731131
AT5G35690	0.93954	0.935397	WSS1B
AT5G35790	0.312766	0.59829	G6PD1
AT5G36230	0.862461	0.529495
AT5G37070	-0.0768732	0.520787
AT5G37260	0.875377	1.34788	RVE2
AT5G37475	1.14059	0.528329
AT5G37590	0.605932	0.557892
AT5G37600	0.359334	0.687465	GSR 1
AT5G37720	0.834717	0.626074	ALY4
AT5G37740	0.497037	0.559993
AT5G37760	-0.300602	0.551815
AT5G37850	0.287661	0.615895	SOS4
AT5G38290	0.584819	0.51994
AT5G38470	-0.0411585	0.609341	RAD23D
AT5G38690	0.756747	0.538241	DDR1
AT5G38720	-0.334318	0.597252	RRP7
AT5G38895	0.89428	0.528399
AT5G39040	0.088386	0.667059	ABCB27
AT5G39210	-0.285264	0.939736	CRR7
AT5G39600	1.11103	0.513795
AT5G39610	0.641658	0.515596	NAC6
AT5G39660	0.953759	1.01309	CDF2
AT5G40180	1.05882	1.23293
AT5G40440	0.22813	0.661091	MKK3
AT5G40580	0.514487	0.518023	PBB2
AT5G40645	0.00441334	0.515105
AT5G40780	0.247548	0.639215	LHT1
AT5G40890	0.716131	0.687851	CLC-A
AT5G41010	0.489553	0.540368	NRPB12
AT5G41050	0.450945	0.733783
AT5G41060	0.866724	0.508358
AT5G41080	0.582946	0.62701	GDPD2
AT5G41100	0.283582	0.648135
AT5G41480	0.220515	0.524382	GLA1
AT5G41590	0.730966	1.95442
AT5G41700	0.0129032	0.505253	UBC8
AT5G42060	-0.665576	0.558756
AT5G42270	0.543558	0.526694	VAR1
AT5G42570	0.128765	0.814174
AT5G42760	0.880591	1.18612
AT5G42900	0.0398982	1.49872	COR27
AT5G42980	0.595616	0.584504	TRX3
AT5G42990	0.551637	0.574951	UBC18
AT5G43260	0.496587	0.624271
AT5G43270	0.769837	0.90739	SPL2
AT5G43420	0.298958	0.628646	ATL16
AT5G43440	-0.284807	0.545111
AT5G43450	0.861515	0.715441
AT5G43460	0.309478	0.5212
AT5G43560	0.0640508	0.509991	MUSE14
AT5G43580	0.0897853	1.07675	UPI
AT5G43700	0.984782	1.05148	ATAUX2-11
AT5G43740	0.23794	0.987528
AT5G43840	0.603628	0.937445	HSFA6A
AT5G43860	1.14873	0.924893	CLH2
AT5G43960	0.547263	0.601156
AT5G44005	0.249904	0.80512
AT5G44010	-0.336794	0.698947
AT5G44110	0.871822	0.739326	ABCI21
AT5G44250	0.627333	0.848896
AT5G44530	0.0584393	0.518044
AT5G44572	0.625829	1.42009
AT5G44580	0.254416	0.695711
AT5G44590	0.306417	1.38135
AT5G44720	0.202858	0.638352
AT5G45040	0.0431166	0.854189	CYTC6A
AT5G45630	1.56006	0.87751
AT5G45680	0.684342	0.638399	FKBP13
AT5G45780	0.126948	0.641848	CIK4
AT5G46295	-0.0114567	0.770625
AT5G46350	-0.0107432	0.852292	WRKY8
AT5G46430	0.395375	0.57522
AT5G46710	0.906805	1.4102
AT5G47040	0.626384	0.819201	LON2
AT5G47060	0.363141	1.26385
AT5G47700	0.258917	0.517804	RPP1C
AT5G47880	-0.0300909	0.815219	ERF1-1
AT5G48150	0.701488	0.642723	PAT1
AT5G48160	0.153433	0.550606	OBE2
AT5G48250	0.632243	1.46085	BBX8
AT5G48385	0.258075	0.541452
AT5G48640	-0.0946183	0.547774	CYCLINC1-1
AT5G48655	-0.106075	0.521587
AT5G48680	0.236899	0.544821
AT5G48790	0.501778	0.539147
AT5G48970	-0.219258	0.581506
AT5G49015	0.515067	0.793179
AT5G49360	0.999679	0.708162	BXL1
AT5G49400	-0.00221649	0.529235
AT5G49520	0.192815	0.566744	WRKY48
AT5G49540	0.0270094	0.809341
AT5G50100	0.0784226	0.739117	DCC1
AT5G50315	-0.199762	0.803098
AT5G50430	0.233401	0.619893	UBC33
AT5G50440	0.582025	0.546991	MEMB12
AT5G50450	0.463908	0.56052
AT5G50990	1.5979	0.507434
AT5G51010	0.388715	0.56408
AT5G51040	0.544409	0.56705	SDHAF2
AT5G51100	-0.123593	0.59603	FSD2
AT5G51570	0.619788	0.647666	HIR3
AT5G51830	-0.113971	0.93556	FRK1
AT5G51880	-0.134149	0.670153
AT5G51940	1.03474	0.709915	NRPB6A
AT5G52040	-0.083435	0.740434	RS41
AT5G52200	0.420619	0.63076	I-2
AT5G52210	0.254359	0.631906	GB1
AT5G52300	-0.302052	0.891812	LTI65
AT5G52310	0.0644603	2.1252	LTI78
AT5G52545	0.417891	0.51748
AT5G52882	0.900319	0.730967
AT5G53140	0.187057	0.500383
AT5G53290	0.341524	0.967043	CRF3
AT5G53490	0.54875	0.737019	TL17
AT5G53570	0.11361	0.560445	RABGAP22
AT5G53930	0.230058	0.776004
AT5G53940	0.547241	0.678023
AT5G53970	0.85271	0.883221	TAT7
AT5G54145	0.0646232	0.578132
AT5G54170	0.23655	0.596329
AT5G54310	-0.164303	0.518154	AGD5
AT5G54470	-0.26302	0.809811	BBX29
AT5G54500	0.713365	0.566492	FQR1
AT5G54580	-0.382433	0.591864	ORRM2
AT5G54940	0.110259	0.875109
AT5G54980	0.338844	0.535695	CASPL2D1
AT5G55530	0.269373	0.767836
AT5G55610	0.0379025	0.581228
AT5G55620	0.0511734	0.503497
AT5G55850	0.150709	0.730507	NOI
AT5G55896	0.355476	0.725152
AT5G55970	-0.106293	0.510686	DDR1
AT5G55990	0.0591193	0.739741	CBL2
AT5G56170	0.346264	0.764418	LLG1
AT5G56240	0.599158	0.756758
AT5G56250	0.10294	0.518181	HAP8
AT5G56340	0.227619	0.729386	ATCRT1
AT5G56350	0.17766	0.662316
AT5G56544	0.418814	1.25712
AT5G56550	0.711367	1.33018	OXS3
AT5G56710	-0.0149786	0.511871
AT5G56860	0.098729	0.798615	GNC
AT5G56950	0.783047	0.647964	NAP1;3
AT5G57110	0.0922695	1.02034	ACA8
AT5G57340	-0.361359	0.776132
AT5G57345	-0.0200501	0.500885	ATOXR
AT5G57380	-0.228792	1.49724	VIN3
AT5G57560	0.964258	0.552155	TCH4
AT5G57630	0.639312	0.911141	CIPK21
AT5G57860	0.936419	0.707452
AT5G57887	-0.075039	1.98231
AT5G58620	0.250182	0.651794	TZF9
AT5G58640	0.662188	0.587148
AT5G58650	1.07977	0.515085	PSY1
AT5G58840	0.537203	0.653603
AT5G59300	0.670375	0.562671	UBC7
AT5G59420	0.421849	0.551905	ORP3C
AT5G59460	0.123044	0.661833
AT5G59470	-0.3085	0.535073
AT5G59820	0.494451	0.83322	RHL41
AT5G59880	0.636421	0.518039	ADF3
AT5G60100	-0.679551	1.28999	PRR3
AT5G60290	0.16198	0.622057
AT5G60400	0.221601	0.57401
AT5G60540	0.517179	0.605249	PDX2
AT5G60680	0.646922	0.558011
AT5G60730	-0.733692	0.599917	GET3C
AT5G60980	0.234916	0.5729	NTF2
AT5G61030	-0.511268	0.667724	RBGA7
AT5G61210	0.986448	0.555156	SNAP33
AT5G61240	-0.0645699	0.624679
AT5G61370	1.14034	1.09081
AT5G61380	-0.143523	1.13713	TOC1
AT5G61450	0.167871	0.605326
AT5G61530	0.110619	0.522214
AT5G61560	0.58606	0.61107	PUB51
AT5G61590	0.465806	0.745958	DEWAX
AT5G61820	0.381535	1.10415
AT5G62050	0.387492	0.606211	OXA1
AT5G62150	1.23624	0.891327
AT5G62240	-0.202243	1.44434	TPXL8
AT5G62360	-0.0385448	1.74312	PMEI13
AT5G62460	0.762541	0.5702	RZFP
AT5G62520	0.238288	0.692377	SRO5
AT5G62630	-0.522447	0.722082	HIPL2
AT5G62640	0.27651	0.69428	ELF5
AT5G62740	1.10385	0.542764	HIR1
AT5G62880	0.199806	0.592547	RAC10
AT5G62900	0.397867	0.827903
AT5G62950	0.902226	0.552296
AT5G63000	1.23549	0.51774
AT5G63160	0.984485	0.864175	bt1
AT5G63280	0.062798	0.838428
AT5G63640	0.684193	0.641398	TOL5
AT5G63790	0.458506	0.502961	NAC102
AT5G63952	0.161765	0.59019
AT5G63990	-0.293795	0.712512
AT5G64020	0.182848	0.64539	TBL14
AT5G64750	-0.0774803	0.855057	ABR1
AT5G64816	-0.192769	0.503354
AT5G64850	-0.0993149	0.609317
AT5G65030	0.571092	0.600752
AT5G65050	0.96983	0.60352	AGL31
AT5G65070	-0.236933	0.521016	MAF4
AT5G65120	-0.54272	0.596404
AT5G65207	0.111058	0.687069
AT5G65210	0.247981	0.503073	TGA1
AT5G65300	0.356835	0.565507	SUPA
AT5G65430	0.692536	0.664058	GRF8
AT5G65575	0.377782	0.757891
AT5G65685	0.759871	0.510006	SS5
AT5G65687	0.44656	0.50691
AT5G65810	0.223498	0.502947	CGR3
AT5G65870	-0.252708	0.626507	PSK5
AT5G65890	-0.414008	0.734053	ACR1
AT5G66558	-1.26882	0.788126
AT5G67480	0.610106	1.2624	BT4

## Sheet: K4_3d_Loss
Supplementary Table 3
(D) Genes losing H3K4me3 after 3d of cold exposure
Gene	log2FCNvs3h	log2FCNvs3d	Name
AT1G03120	0.128409	-1.10316	RAB28
AT1G03300	0.323582	-0.811009	ATDUF1
AT1G03410	-0.376237	-0.532058	2A6
AT1G04010	0.261704	-0.505143	PSAT1
AT1G04150	0.606058	-0.597069	MCTP10
AT1G04360	-0.00894836	-0.67419	ATL1
AT1G06160	0.350871	-0.867873	ORA59
AT1G06620	-0.440568	-1.04465
AT1G06760	0.767213	-0.631845	H1.1
AT1G06850	0.232752	-0.526661	bZIP52
AT1G07400	-0.237117	-0.580387	HSP17.8
AT1G07500	0.780915	-0.515344	SMR5
AT1G07890	-0.157359	-0.602996	APX1
AT1G08280	-0.400941	-0.510507	GALT29A
AT1G09310	0.619536	-0.787122
AT1G09390	1.08176	-1.4497
AT1G09650	-0.630893	-0.575855
AT1G10340	0.163661	-0.750965
AT1G11410	-0.594472	-0.581614
AT1G11420	-0.559066	-0.578173	DUF2
AT1G11700	-0.207769	-0.715907
AT1G11740	0.112054	-0.56467
AT1G12380	-0.256727	-0.687291
AT1G12550	-0.321405	-0.643465	HPR3
AT1G13080	0.0183806	-0.808442	CYP71B2
AT1G13090	-0.0779135	-0.536696	CYP71B28
AT1G13540	-0.406026	-0.841388
AT1G14190	-0.200284	-0.833415
AT1G14520	-1.11357	-1.32266	MIOX1
AT1G14750	-0.270507	-0.781296	SDS
AT1G15000	-0.0961327	-0.546896	scpl50
AT1G15125	0.796805	-0.830224
AT1G15175	-0.228157	-0.809655
AT1G15190	0.269078	-0.620814	FLA19
AT1G15405	-0.464432	-1.03277
AT1G15760	0.308873	-0.697619
AT1G15790	0.809296	-0.600317
AT1G15825	1.15341	-0.647823
AT1G15830	0.353193	-1.11213
AT1G16110	0.433193	-0.501934	WAKL6
AT1G16120	-0.128077	-0.536413	WAKL1
AT1G16340	-0.612281	-0.558045	ATKDSA2
AT1G16515	-0.237088	-0.52714
AT1G16770	0.687704	-0.633816
AT1G17030	-1.01663	-0.500468
AT1G17235	0.555277	-0.671752	RTFL11
AT1G17420	-0.135187	-0.725624	LOX3
AT1G17430	0.314451	-0.51238
AT1G18140	-0.188128	-0.543698	LAC1
AT1G18410	-0.846687	-0.503175
AT1G18420	-0.335311	-1.2604	ALMT3
AT1G18770	-0.211826	-0.7929
AT1G19300	0.712107	-0.565816	PARVUS
AT1G19550	1.3253	-0.800904	DHAR
AT1G19670	-0.00121593	-0.509132	CLH1
AT1G20310	0.297241	-0.58522
AT1G20350	0.684906	-1.10306	TIM17-1
AT1G20390	-0.621681	-0.886455
AT1G20510	-0.282904	-0.570187	OPCL1
AT1G21270	0.253931	-1.11762	WAK2
AT1G21500	-0.227153	-1.05929
AT1G21550	-1.18883	-0.986014
AT1G22380	0.584428	-0.748279	UGT85A3
AT1G23080	0.213125	-0.900809	PIN7
AT1G23850	0.867469	-0.860028
AT1G25450	0.580703	-0.742562	KCS5
AT1G26150	-0.974741	-1.15218	PERK10
AT1G26540	-0.361011	-0.632886
AT1G26761	-0.162574	-0.621846
AT1G27140	-0.502081	-0.797884	GSTU14
AT1G27410	0.130007	-0.544133
AT1G27640	-1.02648	-1.28818
AT1G27670	0.0460425	-0.923788
AT1G28010	0.343354	-0.809445	ABCB14
AT1G28610	-0.422151	-0.559934
AT1G28660	0.235949	-1.024
AT1G28670	0.454106	-0.706252	ARAB-1
AT1G28680	-0.565867	-1.18803	COSY
AT1G28685	-2.26765	-0.759725
AT1G29440	-0.974679	-0.767372	SAUR63
AT1G29460	-0.919675	-0.809657	SAUR65
AT1G29465	-0.409167	-0.501939
AT1G29660	1.04134	-0.929691
AT1G29910	0.286273	-0.683462	CAB3
AT1G29920	0.592668	-0.664408	CAB2
AT1G30570	-0.360063	-0.73068	HERK2
AT1G31290	-0.161257	-0.676416	AGO3
AT1G31320	0.766567	-0.66957	LBD4
AT1G31950	1.48604	-0.518464	TPS29
AT1G31960	-1.21195	-1.32826
AT1G33260	-0.285436	-0.837909
AT1G34315	-0.825284	-0.623698
AT1G35110	-1.34917	-0.725049
AT1G35320	-0.487408	-0.692762
AT1G44350	0.387791	-0.59137	ILL6
AT1G45010	0.139477	-0.791627
AT1G49130	-0.0603986	-1.31743	BBX17
AT1G49640	-0.543954	-0.755747
AT1G51140	-1.24863	-1.07922	FBH3
AT1G51170	0.742096	-0.65814	UCN
AT1G51440	-0.598124	-0.939707	DALL2
AT1G52230	0.0799075	-0.529427	PSAH2
AT1G52240	-0.0199849	-0.885343	ROPGEF11
AT1G52750	-0.071556	-0.786071
AT1G53060	-0.662958	-0.611951
AT1G53230	-1.09845	-0.851139	TCP3
AT1G53480	1.31815	-1.23492	MRD1
AT1G53520	-0.288803	-0.826082	FAP3
AT1G53700	-0.329766	-0.638334	WAG1
AT1G53830	-0.464073	-0.80902	PME2
AT1G53840	-0.131182	-0.511094	PME1
AT1G54120	-0.209258	-1.11674
AT1G55390	-0.228173	-0.876527
AT1G55660	-0.0986167	-1.03968	FOF2
AT1G56670	1.03573	-0.754798
AT1G59640	0.233966	-0.737807	BPEP
AT1G59860	-0.267973	-0.651004	HSP17.6A
AT1G60540	-1.03139	-1.01445	DRP4B
AT1G60545	-1.7898	-0.689503
AT1G61260	-0.428136	-0.874952
AT1G61275	-0.269237	-0.966464	U12
AT1G61665	0.135749	-2.86631
AT1G61930	-0.449339	-0.703815	S40-6
AT1G62370	0.229271	-0.696193
AT1G62520	-0.106158	-0.939307
AT1G62610	-0.038448	-0.595618
AT1G62900	-0.775556	-0.569038
AT1G63040	-0.0379915	-0.760718
AT1G63380	0.0596852	-0.521266
AT1G63570	-0.494728	-0.760999
AT1G64200	0.350422	-0.609533	VHA-E3
AT1G64250	-0.599436	-0.504504
AT1G64390	-0.527638	-0.710214	GH9C2
AT1G64670	-0.402252	-1.30823	BDG1
AT1G65240	-0.623484	-0.756803	A39
AT1G65486	0.192563	-0.706515	STMP4
AT1G65710	0.655099	-0.52825
AT1G65730	-0.523829	-0.529605	YSL7
AT1G65970	0.00333931	-1.04693	TPX2
AT1G66170	-0.496907	-0.609255	MMD1
AT1G66190	-0.249889	-0.531503
AT1G67460	-0.621161	-0.647313
AT1G67590	0.0538818	-0.621006
AT1G67790	-0.52232	-0.677502
AT1G68110	0.532526	-0.860828	CLAP
AT1G68780	0.160317	-0.957806
AT1G69430	0.341072	-0.920363
AT1G69530	0.527656	-0.977588	EXPA1
AT1G70550	-0.358662	-0.771926
AT1G70710	0.642741	-0.659779	GH9B1
AT1G70980	0.0093699	-0.578478	SYNC3
AT1G70985	-0.101154	-0.876488
AT1G70990	-0.248827	-1.35365	EXT33
AT1G72120	-0.396692	-0.695897	NPF5.14
AT1G72125	1.06272	-0.698038	NPF5.13
AT1G72200	-0.00583355	-0.518317	ATL11
AT1G72240	0.763598	-0.999138
AT1G72620	-0.651533	-0.909535
AT1G72800	0.179814	-0.579559
AT1G72810	0.027276	-0.568335
AT1G72860	-1.65106	-0.614767
AT1G74130	-0.863341	-0.585486
AT1G74310	-0.349767	-0.906111	HSP101
AT1G74440	0.361654	-0.547986
AT1G74480	0.28989	-2.0827	RKD2
AT1G75580	0.283785	-0.757794	SAUR51
AT1G76040	0.702758	-0.500667	CPK29
AT1G76100	0.16424	-1.14789	PETE1
AT1G77855	-0.661029	-0.698788
AT1G78480	#DIV/0!	-0.662253
AT1G78680	-0.203215	-0.532534	GGH2
AT1G79370	1.47404	-0.519757	CYP79C1
AT1G79620	-0.411565	-0.636474	VRLK1
AT1G79800	-0.914741	-0.763931	ENODL7
AT1G80240	-0.330068	-0.860134	DGR1
AT1G80310	-0.128764	-0.611226	MOT2
AT1G80325	-0.159446	-0.518856
AT1G80520	-0.301876	-0.578988
AT2G01300	0.614612	-0.542261
AT2G05060	-0.850847	-2.14939
AT2G05070	0.395615	-0.713475	LHCB2.2
AT2G05160	0.89078	-0.770643
AT2G05632	0.13011	-0.643713
AT2G05980	-0.64206	-0.503114
AT2G13610	-0.143142	-0.665286	ABCG5
AT2G14890	0.218191	-0.554458	AGP9
AT2G15400	0.279612	-0.558675	NRPE3B
AT2G15440	0.0843277	-0.904174
AT2G17780	-0.291768	-0.843679	MCA2
AT2G18050	0.998517	-0.620507	HIS1-3
AT2G18340	-0.789684	-0.809884
AT2G18560	0.612362	-0.873668
AT2G19572	-1.41423	-1.68082
AT2G19582	-0.431584	-1.44353
AT2G19780	-0.252918	-0.510756
AT2G20250	-0.264649	-0.691144
AT2G20560	-0.591531	-0.632855	DNAJ
AT2G20850	-0.0263756	-0.611091	SRF1
AT2G20880	0.145956	-1.31755	ERF53
AT2G21200	-1.07878	-1.70082	SAUR7
AT2G21630	-0.112363	-0.607518	ATSEC23C
AT2G21830	-0.845475	-0.862737
AT2G22200	0.19902	-0.51123
AT2G22830	-0.0607052	-0.53758	SQE2
AT2G23740	-0.238562	-0.629318	SUVR5
AT2G24150	-0.349758	-0.544638	HHP3
AT2G24310	-0.807472	-1.19571
AT2G24540	0.0684416	-2.06477	AFR
AT2G24545	-1.87733	-0.802169
AT2G24600	0.771619	-0.634046
AT2G25680	-0.381448	-0.508878	MOT1
AT2G25770	-0.365751	-0.748253
AT2G26150	-0.259199	-1.85411	HSFA2
AT2G26170	-0.0530626	-0.624128	CYP711A1
AT2G27000	0.817744	-0.558965	CYP705A8
AT2G27010	-0.193994	-0.533828	CYP705A9
AT2G27060	-0.515015	-0.576154
AT2G28920	1.1208	-0.759741	ATL84
AT2G28950	0.638182	-0.525314	EXPA6
AT2G29290	0.466201	-0.926772	DEG14
AT2G29300	-1.48399	-0.809417
AT2G29310	-1.82531	-0.720726
AT2G29600	-0.596156	-0.645039
AT2G30560	-0.282189	-1.17762
AT2G30790	0.133804	-0.583273	PSBP-2
AT2G31141	-1.2326	-0.627837
AT2G31730	0.585308	-0.726735
AT2G32179	-1.41944	-0.70912
AT2G32560	-0.027415	-0.637242
AT2G33580	0.399178	-0.588471	LYK5
AT2G34010	-0.0453917	-0.878048	TIE4
AT2G34060	-0.209087	-0.620966
AT2G34170	-0.313822	-1.02063	DEG21
AT2G34430	0.123332	-2.1611	LHB1B1
AT2G34490	0.231554	-1.17561	CYP710A2
AT2G34620	0.586679	-0.990762	MTERF10
AT2G34930	0.906519	-0.698061
AT2G34940	0.303801	-0.585471	VSR5
AT2G35200	-0.678685	-0.616838
AT2G35345	1.01887	-0.692652
AT2G35350	-0.785309	-0.519982	PLL1
AT2G35637	-1.06154	-0.530442
AT2G35760	-0.58327	-0.715974	CASPL2B2
AT2G35860	-0.410427	-0.999931	FLA16
AT2G36026	-0.486981	-0.799271
AT2G36120	-0.254114	-0.811228	DOT1
AT2G36590	0.688051	-0.59238	ProT3
AT2G36770	0.376277	-0.580513
AT2G36792	-1.58331	-1.11358
AT2G36830	0.144089	-1.76309	GAMMA-TIP
AT2G36980	0.368527	-0.517769
AT2G37170	-0.158743	-0.830517	PIP2B
AT2G37180	0.492208	-1.24902	RD28
AT2G37550	-0.729285	-0.891213	AGD7
AT2G37555	-0.473674	-0.523242
AT2G37790	0.888774	-0.883619	AKR4C10
AT2G38010	-0.791318	-0.520899	ATNCER2
AT2G38580	-0.643505	-0.588462
AT2G38750	-0.489839	-0.653459	ANNAT4
AT2G38760	-0.00800789	-0.727433	ANNAT3
AT2G39250	-0.890732	-0.520237	SNZ
AT2G39350	0.0930833	-0.548256	ABCG1
AT2G40170	0.100135	-0.755878	GEA6
AT2G40610	0.697716	-1.22964	EXPA8
AT2G41231	-1.39964	-0.784822
AT2G41550	0.0272901	-0.527563
AT2G41870	-0.154171	-0.565609	REM4.2
AT2G42200	0.19479	-0.529978	SPL9
AT2G42220	0.17137	-0.764209
AT2G42247	-1.1778	-0.676572
AT2G42320	-0.0818829	-0.600471
AT2G42380	-0.021648	-0.525364	BZIP34
AT2G42800	-0.723533	-0.827811	RLP29
AT2G43010	-1.99257	-1.22237	PIF4
AT2G43570	1.35241	-0.713947	CHI
AT2G44230	1.40939	-0.951694
AT2G44260	-1.35366	-0.979205
AT2G44840	0.33574	-0.527508	ERF13
AT2G45050	0.0435082	-0.502203	GATA2
AT2G45310	2.54699	-0.868188	GAE4
AT2G45400	-0.470048	-0.563219	BEN1
AT2G45610	-0.166476	-0.691786
AT2G46150	-0.403558	-1.07776
AT2G46300	-0.376593	-0.563939
AT2G46660	0.105622	-0.526939	CYP78A6
AT2G47340	-0.639264	-0.902053
AT2G47520	-0.10729	-0.548362	ERF71
AT2G47570	-0.660278	-0.529592
AT2G47895	-1.0325	-1.55444
AT2G47930	0.666962	-1.02157	AGP26
AT3G01030	-0.785152	-0.653882
AT3G01513	-0.537795	-0.677129
AT3G01700	-0.0435827	-0.617173	AGP11
AT3G02050	0.0471113	-0.559905	KUP3
AT3G02470	-0.284344	-0.607146	SAMDC
AT3G02620	0.678664	-0.618958	AAD4
AT3G02790	-0.376621	-0.535371	MBS1
AT3G02980	0.3716	-0.6059	MCC1
AT3G04360	-0.069658	-0.593062
AT3G04530	-0.509828	-0.587614	PPCK2
AT3G05030	0.0937759	-0.566183	NHX2
AT3G05130	-0.311345	-0.621689
AT3G05320	-0.619568	-1.04856	OFT1
AT3G05470	-0.502874	-0.691579	FH11
AT3G06433	-0.215342	-0.598778
AT3G06868	-0.359608	-0.621782
AT3G06880	-0.358549	-0.850618
AT3G06990	-0.286231	-0.889021
AT3G07000	0.0246674	-0.841414
AT3G07540	-0.225288	-0.572496	FH10
AT3G08030	0.446566	-0.503277	ATHA2-1
AT3G08660	-0.590334	-0.541403
AT3G08800	0.202033	-0.524111	SIEL
AT3G11370	-0.668784	-1.15126
AT3G11390	0.267549	-0.705157
AT3G11550	-0.50299	-1.07304	CASP2
AT3G12040	-0.151393	-0.654325
AT3G12110	-0.183551	-0.994766	ACT11
AT3G12580	-0.548672	-1.64229	HSP70
AT3G12970	-0.00793003	-0.640888
AT3G13438	-1.85762	-0.925027	SADHU7-1
AT3G13470	-0.2073	-0.844952	CPN60BETA2
AT3G13760	0.834619	-0.524344
AT3G13850	0.108704	-0.63323	LBD22
AT3G14450	-0.491311	-0.749873	CID9
AT3G14760	1.21672	-0.526134
AT3G15550	-1.51285	-1.10642
AT3G15570	-1.06211	-1.52876
AT3G16050	-0.3684	-0.615017	PDX1.2
AT3G16130	-0.825538	-2.0009	ROPGEF13
AT3G16370	0.358214	-0.544534
AT3G16380	0.173443	-0.520121	PAB6
AT3G16460	0.588712	-0.781226	JAL34
AT3G16650	-0.379612	-0.53689	PRL2
AT3G17050	0.4544	-0.80905
AT3G17120	-0.745424	-0.564091
AT3G17640	-0.674221	-0.596882
AT3G17660	-0.476338	-0.58533	AGD15
AT3G18070	0.371495	-0.550574	BGLU43
AT3G18080	-0.592117	-0.709868	BGLU44
AT3G18090	0.12371	-0.641584	NRPD2B
AT3G18710	-0.435394	-0.653714	PUB29
AT3G18950	0.133249	-0.549343	AIW1
AT3G19000	0.558415	-0.835061
AT3G19300	-0.379675	-0.546639
AT3G20075	-1.40327	-0.56616	CYP705A14P
AT3G20080	-0.0829623	-0.543974	CYP705A15
AT3G20370	0.267052	-0.769094
AT3G20395	0.646274	-0.775548	ATL92
AT3G20530	0.10198	-0.512475	PBL23
AT3G20830	0.172839	-0.708316	UCNL
AT3G21050	0.153429	-1.15342
AT3G21330	-0.297964	-0.927789
AT3G22100	-0.255289	-0.658131
AT3G23240	-0.525132	-0.669033	ERF1
AT3G23450	0.320776	-1.1143	KRATOS
AT3G24100	0.0448504	-1.87027	BIA
AT3G24300	0.456489	-0.697636	AMT1;3
AT3G25110	-0.156578	-0.720179	FaTA
AT3G25590	0.0422657	-0.64803
AT3G25900	-0.587717	-0.556359	HMT-1
AT3G26470	-0.088199	-0.670894
AT3G26480	-0.944332	-0.648167
AT3G27415	-1.91914	-0.712452
AT3G27510	-0.0278778	-0.525285
AT3G27660	0.141161	-0.612098	OLEO4
AT3G27690	0.50564	-1.02448	LHCB2.3
AT3G28315	-0.837332	-0.669297
AT3G29320	-0.705243	-0.864554	PHS1
AT3G30770	1.33702	-0.889553
AT3G43654	-0.621202	-0.523399
AT3G43690	-0.65578	-0.716141
AT3G44050	0.26491	-0.507953
AT3G44990	-1.66416	-1.47904	XTH31
AT3G45710	0.16439	-0.640842	NPF2.5
AT3G46540	-0.241213	-0.575487
AT3G46780	0.521449	-1.09438	PTAC16
AT3G47100	-0.500574	-0.59475
AT3G47460	-0.300548	-1.01183	ATSMC2
AT3G48720	0.407424	-0.733162	DCF
AT3G49930	0.650119	-0.759466
AT3G50190	0.20266	-1.11108
AT3G50270	-0.217188	-0.660808
AT3G50770	0.291279	-0.993348	CML41
AT3G50800	-0.322699	-0.52281
AT3G51080	0.755265	-0.579213	GATA6
AT3G51290	-0.0584928	-0.573217	APSR1
AT3G51440	-0.413471	-0.563337
AT3G51970	-0.100236	-0.706796	ASAT1
AT3G52370	-0.251724	-0.500682	FLA15
AT3G52605	-1.24134	-0.550649
AT3G53680	-0.137447	-0.675687
AT3G53830	-0.81444	-0.687126
AT3G54390	-0.332176	-0.64077
AT3G54690	0.16599	-0.578391	SETH3
AT3G54720	-0.201789	-0.550044	AMP1
AT3G54810	-0.190668	-0.590865	BME3
AT3G55090	-0.198429	-0.620512	ABCG16
AT3G56000	-0.39727	-1.1679	CSLA14
AT3G56060	-0.170374	-0.610015
AT3G56825	-0.916014	-0.721929	U2.4
AT3G57765	-2.1793	-2.2018	U2.3
AT3G58930	-0.649069	-0.851528
AT3G58975	-0.489802	-0.50504
AT3G59010	0.447145	-0.633193	PME61
AT3G59200	-0.66441	-0.576532
AT3G60550	0.791524	-0.50853	CYCP3;2
AT3G61198	0.858038	-1.27677
AT3G61450	-0.719847	-0.601311	SYP73
AT3G61470	0.58471	-0.920691	LHCA2
AT3G61880	-0.19602	-0.628651	CYP78A9
AT3G61950	0.42038	-0.964752	MYC67
AT3G62070	-0.527375	-0.735732
AT3G62430	-0.70513	-0.752273
AT3G62529	0.565087	-0.690818
AT3G63020	-0.337099	-0.644095
AT3G63430	-0.473344	-0.538527	TRM5
AT3G63450	0.0600292	-0.551774
AT3G63480	-0.68146	-0.672368	KIN-1
AT4G00750	-0.00272041	-0.518209
AT4G01200	-0.336816	-0.685418
AT4G01735	-0.484112	-0.808074
AT4G01925	0.00465701	-0.778703
AT4G02150	-0.424701	-0.500095	MOS6
AT4G02420	-0.204168	-0.519163	LECRK-IV.4
AT4G03070	0.249677	-0.613551	AOP1
AT4G03210	0.76292	-0.793288	XTH9
AT4G04570	0.56452	-0.715468	CRK40
AT4G05180	0.105858	-1.33405	PSBQ-2
AT4G05400	0.496891	-0.550414
AT4G07960	-0.740098	-0.556839	CSLC12
AT4G08040	-0.509599	-1.10007	ACS11
AT4G09160	-0.104011	-0.562205	PATL5
AT4G09920	-0.616883	-0.602158
AT4G10770	-0.678046	-0.925826	OPT7
AT4G11460	1.05278	-1.11566	CRK30
AT4G12382	0.636895	-0.502198
AT4G12400	0.514076	-1.16015	Hop3
AT4G12690	0.305161	-0.999249
AT4G13505	-0.934151	-0.751361
AT4G14130	0.0210402	-1.15882	XTH15
AT4G14400	0.450991	-0.903184	ACD6
AT4G14440	0.138489	-0.546183	HCD1
AT4G15960	0.967837	-0.505607
AT4G16640	0.867427	-0.532588	AT1-MMP
AT4G17250	0.615591	-0.533789
AT4G17340	-0.198555	-2.43685	TIP2;2
AT4G17770	0.195472	-0.533299	TPS5
AT4G19020	-0.112414	-0.542591	CMT2
AT4G19170	0.0381563	-0.562015	NCED4
AT4G20140	0.224723	-0.653628	GSO1
AT4G20290	-1.13865	-0.59953
AT4G20510	-0.165174	-0.558136
AT4G21410	0.546238	-0.756045	CRK29
AT4G21420	-0.193551	-0.527121
AT4G21480	0.282274	-0.514958	STP12
AT4G21820	0.592145	-0.662003
AT4G21890	-0.577009	-0.611363
AT4G21930	-1.56531	-0.783302
AT4G22120	-0.11432	-0.601996	CSC1
AT4G22170	0.252558	-0.578023	ATFDB31
AT4G22390	0.565485	-0.533566
AT4G22690	-0.262288	-0.573122	CYP706A1
AT4G22730	1.64492	-0.74119
AT4G22756	0.269798	-0.650999	SMO1-2
AT4G23020	-0.710314	-0.55478	TRM11
AT4G23180	0.0139804	-0.681861	CRK10
AT4G23200	-0.227752	-0.687546	CRK12
AT4G23205	0.114145	-0.728203
AT4G23250	-0.0601333	-0.747935	emb1290
AT4G23290	0.0919085	-0.847665	CRK21
AT4G23300	-0.112363	-1.1148	CRK22
AT4G23510	-0.279356	-0.628797
AT4G23670	0.180396	-0.586426
AT4G23900	-1.04654	-0.835794
AT4G24110	1.08944	-0.779318	HUP40
AT4G24580	-0.113575	-0.509346	REN1
AT4G24780	-0.306264	-0.975916	PLL19
AT4G24810	-0.479244	-1.00866
AT4G25240	-0.232589	-0.506185	SKS1
AT4G25260	-0.217018	-0.721702	PMEI7
AT4G25690	#DIV/0!	-1.40213
AT4G25810	0.403228	-0.995074	XTR6
AT4G26488	-0.887508	-0.628978
AT4G26590	-1.02429	-0.705038	OPT5
AT4G26760	-0.385888	-0.778001	MAP65-2
AT4G26890	1.08048	-0.639776	MAPKKK16
AT4G26970	0.071706	-0.567276	ACO2
AT4G27220	-0.688782	-0.503599
AT4G27460	0.667646	-0.507859	CBSX5
AT4G27850	-0.909716	-0.674495
AT4G28280	-0.510126	-0.819555	LLG3
AT4G28420	-0.111084	-0.839346
AT4G28430	-0.203045	-0.560265	RTN18
AT4G28700	-0.021247	-0.871625	AMT1;4
AT4G29310	0.34497	-0.510635
AT4G30280	1.08015	-1.01841	XTH18
AT4G30340	0.0930585	-0.627362	DGK7
AT4G31000	0.954065	-0.714109
AT4G31250	-0.840567	-0.666474	PRK7
AT4G31840	0.13162	-0.567284	ENODL15
AT4G32205	0.0369177	-0.832199
AT4G33370	-0.569299	-0.754211
AT4G33930	-0.315892	-0.71262
AT4G34220	-0.378098	-0.618907	RDK1
AT4G34250	0.647359	-0.505254	KCS16
AT4G34930	-0.164258	-0.677219
AT4G35270	-0.911062	-0.564499	NLP2
AT4G36100	-0.992948	-0.774841	COST3
AT4G36240	0.0483379	-0.831854	GATA7
AT4G36830	-1.21195	-0.671464	HOS3-1
AT4G36950	1.4359	-0.508759	MAPKKK21
AT4G37295	-0.347567	-1.09664	PIPL3
AT4G37450	-0.21474	-1.0868	AGP18
AT4G37530	-0.0354123	-0.623379
AT4G37550	0.800207	-0.507869	IAMH1
AT4G37580	0.346837	-0.666567	HLS1
AT4G37800	0.157367	-1.1834	XTH7
AT4G38215	-1.19155	-0.64351
AT4G38530	-0.514278	-0.661919	PLC1
AT4G38690	0.279815	-0.504018
AT4G38781	-1.37476	-0.999574
AT4G38950	-0.627725	-0.542165
AT4G39330	0.0870838	-1.38831	CAD9
AT4G39340	-1.53593	-2.30203	EC1.4
AT4G39550	0.0582954	-0.539568
AT4G39840	-0.676807	-0.869004
AT5G01335	0.40142	-0.662404
AT5G01360	0.0456203	-0.694891	TBL3
AT5G01540	-0.813245	-0.873681	LECRK-VI.2
AT5G01550	0.459889	-0.502763	LECRK-VI.3
AT5G01600	#DIV/0!	#DIV/0!	FER1
AT5G01620	0.109544	-0.519781	TBL35
AT5G01740	0.314139	-0.658577
AT5G01760	-0.153063	-0.716564	TOL7
AT5G01840	-0.0627021	-0.612881	OFP1
AT5G01890	-0.259757	-0.571318	PXC2
AT5G01970	-0.0736878	-0.697326	MADA2
AT5G02230	0.247873	-0.527941
AT5G02400	0.100648	-0.527767	PLL2
AT5G02430	-0.109195	-0.958857
AT5G02760	0.32627	-1.01751	APD7
AT5G02811	0.124536	-0.611851
AT5G03350	0.397055	-0.680005	SAI-LLP1
AT5G03435	-1.01388	-0.655312	MCTP13
AT5G03760	0.113621	-0.585807	ATCSLA09
AT5G04320	-0.162944	-0.562163	SGO2
AT5G04530	0.145656	-0.741022	KCS19
AT5G04950	-0.945137	-0.672505	NAS1
AT5G05250	0.555515	-0.555445
AT5G05300	0.116125	-0.718924	IDL6
AT5G05660	0.174956	-0.53982	NFXL2
AT5G06380	-0.701635	-0.528148
AT5G06490	-0.818023	-0.976967	ATL71
AT5G06790	0.297499	-0.696978
AT5G06940	0.435221	-0.553756
AT5G07130	-0.766255	-0.682866	LAC13
AT5G07140	-0.258957	-0.524923
AT5G07460	1.38422	-0.597305	PMSR2
AT5G07990	0.992766	-0.621649	TT7
AT5G08600	-0.788621	-0.521865
AT5G08760	0.94773	-0.903472	STMP8
AT5G09443	-1.12855	-0.64168
AT5G09530	-0.623885	-0.501251	PELPK1
AT5G09540	0.0365271	-0.596833
AT5G10080	-0.0257111	-0.637607
AT5G10090	0.244719	-0.516355	TPR13
AT5G10300	0.221059	-0.662975	MES5
AT5G10380	0.730968	-0.666647	RING1
AT5G10570	-0.643605	-0.744639	AtVip2
AT5G10990	-0.956382	-0.655676	SAUR69
AT5G11550	0.218004	-1.02259
AT5G11780	0.482645	-0.604361
AT5G12030	0.464456	-1.33788	HSP17.6A
AT5G12050	0.0478233	-0.606242	BG1
AT5G12110	-0.943138	-1.34724
AT5G13150	-0.503713	-0.559407	EXO70C1
AT5G13490	0.724378	-0.619031	AAC2
AT5G13520	0.224014	-0.706678
AT5G13660	-0.575626	-0.537363
AT5G13700	-0.863794	-0.652394	PAO1
AT5G13960	0.0466923	-0.610255	SUVH4
AT5G14130	0.143818	-0.605941
AT5G14380	1.01228	-0.630059	AGP6
AT5G14610	-0.0782542	-0.528535	RH46
AT5G14730	0.220491	-0.570744
AT5G14870	0.761847	-1.04375	CNGC18
AT5G15060	0.281708	-0.758089
AT5G15120	1.31011	-0.60029	PCO1
AT5G15530	1.01218	-1.01826	BCCP2
AT5G16030	-0.04676	-1.28168
AT5G16940	-0.279237	-1.19377
AT5G18030	2.06474	-0.570569	SAUR21
AT5G18340	-0.46523	-0.503818	PUB48
AT5G19340	-0.208255	-0.795017
AT5G20260	0.600447	-1.07114
AT5G20540	0.810353	-0.663268	BRXL4
AT5G21050	-0.173728	-0.573914
AT5G21105	0.0135797	-0.511047
AT5G22550	1.23462	-0.50622
AT5G22608	-0.597355	-0.601836
AT5G23270	-0.155155	-0.787941	STP11
AT5G23320	-0.379229	-0.614214	STE14A
AT5G23860	0.0419697	-0.620728	TUB8
AT5G24155	0.24027	-0.503871
AT5G24160	0.341201	-1.80294	SQE6
AT5G25190	-0.298475	-1.3191	ESE3
AT5G25440	-0.264206	-0.741085	SZE1
AT5G25450	-0.734576	-1.23116
AT5G25590	-0.28913	-0.631548
AT5G26582	-1.10328	-0.745897
AT5G26790	0.38074	-0.860594
AT5G27230	0.0388467	-0.678122
AT5G27360	-0.190977	-0.633853	SFP2
AT5G36001	-0.808077	-0.670063	ATL97
AT5G37010	-0.218855	-0.503909
AT5G37490	-0.147846	-0.52127	PUB21
AT5G40150	-0.363061	-0.535233
AT5G40380	0.223529	-0.530998	CRK42
AT5G41120	0.361156	-0.588946	ELT4
AT5G42040	-0.709579	-0.567889	RPN12b
AT5G43160	-0.172555	-0.858442	QWRF9
AT5G43400	-0.764499	-0.613897
AT5G43480	-0.485635	-0.74749
AT5G43990	-1.39904	-0.828074	SUVR2
AT5G44460	1.60884	-0.5072	CML43
AT5G44740	0.0434631	-0.509555	POLH
AT5G45440	1.18384	-0.660105
AT5G45480	0.563977	-0.564915
AT5G45490	-0.346218	-0.946057
AT5G46600	-0.399683	-0.547029
AT5G46690	-0.182132	-2.21497	bHLH071
AT5G47450	-0.442728	-0.695632	TIP2;3
AT5G47590	0.563232	-0.748865
AT5G47900	-0.164566	-0.719297
AT5G48170	-0.647181	-0.587714	SLY2
AT5G48490	0.820026	-0.50735	DIR1-LIKE
AT5G48570	-0.296175	-1.39889	ROF2
AT5G48600	1.16148	-0.637175	SMC3
AT5G49665	-0.225521	-0.605216
AT5G50950	-0.852882	-0.945185	FUM2
AT5G51160	-0.00958291	-0.575109
AT5G51440	-0.322541	-1.86452	HSP23.5
AT5G51480	-0.999745	-0.731725	SKS2
AT5G52640	-1.09938	-1.86476	HSP90.1
AT5G52810	-0.157063	-0.525231	SARD4
AT5G53120	-0.772841	-0.792081	SPDS3
AT5G53370	-0.400517	-0.773884	PMEPCRF
AT5G54250	0.227611	-0.509379	CNGC4
AT5G55730	-0.757075	-0.791496	FLA1
AT5G56010	-0.817884	-0.704082	HSP81-3
AT5G56030	-0.658041	-0.631075	HSP81-2
AT5G57780	1.70366	-0.540548	P1R1
AT5G57790	0.0611231	-0.907044	AOG1
AT5G58390	0.968964	-0.757172
AT5G58630	0.514788	-0.514299	TRM31
AT5G58770	-0.235586	-1.43614	CPT4
AT5G59070	0.329343	-0.605672
AT5G59080	0.0268378	-0.579989
AT5G59170	-0.666552	-0.551623
AT5G59760	1.82446	-0.706951
AT5G60060	0.840782	-0.585377	ATFDA20
AT5G60240	-1.70062	-2.9672
AT5G60840	0.178895	-0.581186
AT5G61160	0.204242	-0.643136	AACT1
AT5G61610	1.10285	-1.27956
AT5G62280	0.379117	-0.78802
AT5G62700	0.106827	-1.01065	TUB3
AT5G63180	-0.483692	-0.700931
AT5G63340	-0.995903	-0.821702
AT5G63920	-0.267908	-0.536388	TOP3A
AT5G64450	-0.193858	-0.846809
AT5G64490	-0.659766	-0.718288	APUM26
AT5G64570	0.0633105	-0.828329	XYL4
AT5G64860	-0.0745317	-0.991708	DPE1
AT5G64870	0.610378	-0.60636	FLOT3
AT5G65010	-0.186573	-0.72247	ASN2
AT5G66310	-0.683803	-0.559449
AT5G66560	-1.56571	-1.36058
AT5G66590	0.145285	-1.14724
AT5G66750	-0.081823	-0.504602	CHR1
AT5G67060	0.497938	-0.613197	HEC1
AT5G67200	-0.104327	-0.520625
AT5G67210	0.167906	-0.671962	IRX15-L
AT5G67280	-0.262606	-0.664605	RLK
AT5G67411	0.539563	-1.0569

## Sheet: K27_3h_Gain
Supplementary Table 3
(E) Genes gaining H3K27me3 after 3h of cold exposure
Gene	log2FCNvs3h	log2FCNvs3d	Name
AT1G02950	1.15345	1.16108	GSTF4
AT1G03700	0.554745	0.505073	CASPL1C2
AT1G03820	0.552255	0.546964
AT1G03982	0.531196	0.606548
AT1G04670	0.513239	0.387736
AT1G06225	0.790448	0.90392	CLE3
AT1G06360	0.722986	0.62687
AT1G07175	0.597737	0.508609
AT1G07485	1.19144	1.13253
AT1G08465	0.561007	0.607093	YAB2
AT1G08810	0.719425	0.811692	MYB60
AT1G09176	0.825783	0.753948
AT1G09480	0.73774	0.808088
AT1G09483	0.770727	0.871619	ATNEAP4
AT1G10586	0.58525	0.612378
AT1G10745	1.32392	1.04811	ESF1.2
AT1G10747	0.787654	0.811571	ESF1.1
AT1G12540	0.658678	0.688345
AT1G12667	0.678513	0.723533
AT1G13590	0.592528	0.6431	PSK1
AT1G13609	0.821668	0.6834
AT1G13620	0.535449	0.717774	RGF2
AT1G17060	0.665308	0.640871	CYP72C1
AT1G18790	0.513997	0.535038	RKD1
AT1G19510	0.840793	0.899951	RL5
AT1G19830	0.655654	0.633688	SAUR54
AT1G20135	0.630496	0.531658
AT1G20290	0.506047	0.570948
AT1G21490	0.557957	0.617202
AT1G21550	0.567224	0.654227
AT1G21864	0.569381	0.538308
AT1G21973	1.15198	1.21871
AT1G22340	0.506846	0.402714	UGT85A7
AT1G22680	0.629131	0.531691
AT1G22720	0.511102	0.498237
AT1G24000	0.506315	0.52111
AT1G24110	0.504896	0.326528
AT1G24657	0.585797	0.653461
AT1G26310	0.500905	0.518051	CAL
AT1G26976	0.699282	0.483705
AT1G27671	0.750782	0.639231
AT1G28305	0.877997	0.87699
AT1G28465	0.773544	0.772281
AT1G28630	0.557521	0.616691
AT1G30040	0.609772	0.64838	GA2OX2
AT1G30795	0.704223	0.551548
AT1G31040	0.532243	0.641555	ORE15
AT1G32280	0.992538	0.973209	END1
AT1G33740	0.628795	0.653488
AT1G33950	0.66305	0.755049	IAN7
AT1G34440	0.635674	0.669664
AT1G35170	0.53686	0.576335
AT1G35240	0.597081	0.664943	ARF20
AT1G35537	0.749662	1.07988	ATPDFL2.1
AT1G35545	0.859172	0.840208
AT1G42560	0.568206	0.76915	MLO9
AT1G44075	0.703644	0.59735
AT1G44286	0.52419	0.636827
AT1G46336	0.862496	0.950212
AT1G47400	0.514937	0.483015	FEP3
AT1G47485	0.52964	0.499842	CEP1
AT1G47786	0.594379	0.658187
AT1G47813	0.880531	1.03952
AT1G48070	0.729791	0.709436
AT1G48325	0.705966	0.81973
AT1G48500	0.54251	0.494498	JAZ4
AT1G49310	0.570257	0.689932
AT1G49475	0.769759	0.764664
AT1G49800	0.653757	0.731307	PREPIPL1
AT1G50080	0.728855	1.16544
AT1G51460	0.582531	0.583935	ABCG13
AT1G52191	0.612649	0.654575
AT1G52211	0.607041	0.709222
AT1G52410	0.57887	0.606777	TSA1
AT1G52460	0.528978	0.594546
AT1G52827	0.670289	0.656623	CDT1
AT1G52840	0.510333	0.544319
AT1G53683	1.03567	0.910151	MIR169D
AT1G54720	0.668023	0.813788
AT1G54950	0.565727	0.667429
AT1G55010	0.64693	0.716912	PDF1.5
AT1G55220	1.01364	0.692869
AT1G56160	0.748107	0.834941	MYB72
AT1G56240	0.909172	0.808567	PP2-B13
AT1G56553	0.53682	0.583211
AT1G56710	0.621229	0.567005	PGL1
AT1G58225	0.726845	0.855266
AT1G60330	0.744617	0.855536
AT1G60480	0.519508	0.428591
AT1G60815	0.918111	1.1711	RALFL7
AT1G61255	0.56575	0.559957
AT1G61542	0.879893	0.696506
AT1G61566	0.567984	0.56945	RALFL9
AT1G61760	0.505186	0.425315
AT1G62760	0.573384	0.569516	ATPMEI10
AT1G62975	0.690336	0.764769
AT1G63057	0.54352	0.685215
AT1G63200	0.500541	0.461554
AT1G63295	0.889203	0.908762
AT1G64000	0.51882	0.555226	WRKY56
AT1G64480	0.615785	0.653814	CBL8
AT1G64618	0.513052	0.564405
AT1G65352	0.65555	0.838135
AT1G65481	0.585188	0.756908
AT1G66010	0.603962	0.524225
AT1G66235	0.502976	0.485861
AT1G66400	0.597415	0.828811	CML23
AT1G66725	0.835259	0.865283	MIR163
AT1G66852	0.668512	0.675139
AT1G66855	0.681717	0.843207
AT1G67025	0.810364	0.833216
AT1G67195	0.604075	0.680078	MIR414
AT1G67330	1.15956	1.13566	AGM2
AT1G67775	0.583349	0.535841	CLE8
AT1G68210	0.514216	0.592196	APRR6
AT1G68825	0.559284	0.526987	RTFL15
AT1G69110	0.549572	0.5927
AT1G69818	1.10507	1.20442
AT1G70030	0.825697	0.933353
AT1G70885	0.52416	0.527981
AT1G72580	0.916418	0.881965
AT1G73600	0.816943	0.814584	NMT3
AT1G73610	0.529973	0.568879
AT1G73630	0.53869	0.313659
AT1G73680	0.892018	0.871538	ALPHA DOX2
AT1G73805	0.777032	0.61164	SARD1
AT1G73830	0.877003	0.657301	BEE3
AT1G75250	0.530721	0.454476	RL6
AT1G75480	0.589014	0.605613
AT1G75900	0.507388	0.546061
AT1G76952	1.28961	1.13126	IDL5
AT1G76960	0.704612	0.873239
AT1G77100	0.637303	0.479327
AT1G77682	0.640207	0.449041
AT1G77980	0.576356	0.597143	AGL66
AT1G77992	#DIV/0!	#DIV/0!
AT1G78476	0.631645	0.750341
AT1G79520	0.515989	0.502556
AT1G81001	0.728465	0.37714
AT1G81020	1.11872	-0.0559841
AT2G01990	0.535046	0.494393
AT2G02023	0.899063	0.543246
AT2G02140	0.759799	0.821517	LCR72
AT2G03320	0.858324	0.793666
AT2G03720	0.925316	0.843632	MRH6
AT2G03821	0.507669	0.308166
AT2G03822	0.683676	0.77854
AT2G04025	0.723985	0.749568	RGF3
AT2G04046	0.737725	0.686045
AT2G04047	0.799499	0.722865
AT2G04140	0.795119	0.655045
AT2G04840	0.531835	0.411131	ATFDB11
AT2G05430	0.547595	0.575363
AT2G05530	0.62031	0.616913
AT2G06020	0.524856	0.751391
AT2G10450	0.781841	0.752602
AT2G11810	0.518395	0.46814	MGDC
AT2G14282	0.720455	0.795181	SCRL18
AT2G15600	0.529057	0.552258
AT2G16225	1.12103	1.0179
AT2G16905	0.580097	0.619364
AT2G18328	0.747887	0.622576	RL4
AT2G19150	0.573121	0.512512
AT2G19893	0.61231	0.651974
AT2G20805	0.892876	0.866535
AT2G20993	0.681631	0.68951
AT2G21727	0.520726	0.461206
AT2G21900	0.545113	0.580963	WRKY59
AT2G21980	0.724051	0.677198
AT2G22145	0.543708	0.620005
AT2G22160	0.724511	0.711151
AT2G22190	0.554468	0.674901	TPPE
AT2G22470	0.680048	0.491478	AGP2
AT2G22630	0.50082	0.551927	AGL17
AT2G22807	0.564633	0.53013
AT2G22942	0.948575	1.08892
AT2G22960	0.711928	0.851386	FPT2
AT2G22970	0.533062	0.780797	SCPL11
AT2G23030	0.504483	0.617241	SNRK2.9
AT2G23130	0.605697	0.624594	AGP17
AT2G24000	0.544663	0.57981	scpl22
AT2G24210	0.580756	0.553932	TPS10
AT2G24748	0.514097	0.606543
AT2G24880	0.926704	1.06293
AT2G24950	0.737056	0.695911
AT2G25410	0.603511	0.670078	ATL22
AT2G25450	0.58795	0.364055	GSL-OH
AT2G25697	0.697436	0.753861
AT2G25780	0.66826	0.661903
AT2G25975	0.749903	0.791095
AT2G26010	0.641675	0.624317	PDF1.3
AT2G26580	0.731616	0.736349	YAB5
AT2G26880	0.846326	0.734076	AGL41
AT2G27520	0.522754	0.548073
AT2G27535	0.598451	0.758779
AT2G27936	1.10171	1.00811
AT2G28210	0.943317	0.945768	ACA2
AT2G28870	0.638106	0.610689	SMR10
AT2G29045	0.790386	0.69425	LCR62
AT2G29125	0.555863	0.628185	RTFL2
AT2G29370	0.643897	0.646136
AT2G30230	0.666117	0.586472
AT2G30420	1.04927	1.09007	ETC2
AT2G30766	0.59034	0.694891	FEP1
AT2G31180	0.642723	0.739695	MYB14
AT2G31215	0.614365	0.581406
AT2G31460	0.884939	0.73098
AT2G31550	0.631017	0.541618
AT2G31930	0.59248	0.722715
AT2G32275	0.53121	0.608139
AT2G32470	0.534625	0.506123
AT2G32698	0.625413	0.50636	MIR407
AT2G32885	0.549181	0.566721
AT2G32890	1.14737	0.686457	RALFL17
AT2G33509	1.09641	1.3414
AT2G33520	0.506933	0.578802	ATHCYSTM7
AT2G34060	0.812119	0.859333
AT2G34320	0.546935	0.408519
AT2G34800	0.686534	0.771978
AT2G34825	0.627927	0.657244	RALFL20
AT2G34870	0.702789	0.548097	MEE26
AT2G35640	0.518424	0.550504
AT2G36040	0.921852	1.16259
AT2G36255	0.777548	0.846697
AT2G36325	0.501363	0.432825
AT2G37540	0.773568	0.981622
AT2G37700	0.522483	0.417674
AT2G38170	0.518188	0.612625	CAX1
AT2G39520	0.535549	0.451935
AT2G39540	0.640304	0.65907
AT2G39590	0.74089	0.68156
AT2G39830	0.52285	0.550798	DAR2
AT2G40530	0.590889	0.541599
AT2G40745	0.641125	0.701872
AT2G40955	0.808936	0.708276
AT2G41231	0.852537	0.321506
AT2G41415	0.774132	0.591738
AT2G41997	0.806516	0.903918	LCR51
AT2G42140	0.553404	0.418022
AT2G42425	0.942691	0.940597
AT2G42460	0.593148	0.466893
AT2G42820	0.757153	0.799468	HVA22F
AT2G43255	0.664886	0.9034
AT2G43520	0.561626	0.481346	TI2
AT2G43670	0.624144	0.510294
AT2G44745	0.756365	0.76913	WRKY12
AT2G44798	0.684024	0.544954
AT2G45110	0.546194	0.431913	EXPB4
AT2G45190	0.504655	0.578609	AFO
AT2G45780	0.688609	0.602217
AT2G45840	0.578842	0.509489
AT2G46255	0.632162	0.576621	MIR159C
AT2G47240	0.653306	0.739309	LACS1
AT3G01185	0.696137	0.718334
AT3G01326	0.624384	0.653447
AT3G01860	0.628398	0.535883
AT3G02940	0.666477	0.666197	MYB107
AT3G03200	0.509181	0.48384	NAC045
AT3G03410	0.635333	0.64633
AT3G04170	0.574678	0.488507
AT3G04430	0.533531	0.425721	NAC049
AT3G04765	1.12885	1.14407	MIR167C
AT3G05860	0.692368	0.665081	AGL45
AT3G06145	0.737074	0.430165
AT3G06435	0.686372	0.544125
AT3G06437	0.806764	0.533088
AT3G10116	0.507486	0.415107
AT3G10815	0.557668	0.479604	BTL03
AT3G10900	0.76078	0.56242
AT3G11480	0.507993	0.556487	BSMT1
AT3G12955	0.862826	0.686672	SAUR74
AT3G13590	0.585102	0.547251
AT3G13898	0.816645	1.01872	EPFL3
AT3G14820	0.564808	0.526015
AT3G16360	0.702492	0.648609	AHP4
AT3G17130	0.564542	0.094238
AT3G17185	0.660441	0.859219	TAS3
AT3G19550	0.687247	0.68599
AT3G20978	0.942375	0.888936
AT3G21755	0.784378	0.810388
AT3G21791	0.684459	0.556663
AT3G21880	0.525567	0.382147	BBX10
AT3G21920	0.999887	0.885414
AT3G21930	0.679334	0.67854
AT3G22231	0.918782	0.801749	PCC1
AT3G22275	0.563661	0.64417	JAZ13
AT3G22400	0.547503	0.506844	LOX5
AT3G23090	0.572424	0.694995	WDL3
AT3G23190	0.62775	0.658107
AT3G23320	0.556062	0.617197
AT3G23870	0.754813	0.633942	ENOR3L2
AT3G24068	0.904619	0.875227
AT3G24420	0.520569	0.407811	DLK2
AT3G24770	0.689699	0.654639	CLE41
AT3G25165	0.686714	0.385458	RALFL25
AT3G25190	0.583922	0.523245	VTL5
AT3G25265	0.936689	0.940162	LCR4
AT3G25630	0.564404	0.592528
AT3G25795	0.669199	0.710912	TAS4
AT3G26605	0.579727	0.649224
AT3G27503	1.11022	1.11543	SCRL19
AT3G27660	0.579488	0.65512	OLEO4
AT3G27809	2.18682	1.93425
AT3G27884	0.60733	0.800224	SORF3
AT3G27965	0.981793	1.07037
AT3G28220	0.510636	0.526616
AT3G29070	0.516835	0.59918
AT3G29780	0.95178	0.865214	RALFL27
AT3G29797	0.537146	0.616327
AT3G29798	0.661412	0.518763
AT3G29970	0.503711	0.53176
AT3G30214	0.650787	0.549286
AT3G30260	0.535096	0.553743	AGL79
AT3G30350	0.527775	0.577021	RGF4
AT3G42180	0.825764	0.856708
AT3G42835	0.792576	0.911498
AT3G43410	0.812148	0.932011
AT3G43420	0.594156	0.609775
AT3G44765	0.505606	0.548531
AT3G45110	0.716839	0.769987
AT3G45180	0.642112	0.601409	UBL5A
AT3G45248	0.646622	0.587439
AT3G45285	0.569665	0.508246
AT3G45673	0.534235	0.81075
AT3G46070	0.562583	0.501068
AT3G46390	0.582252	0.576449
AT3G46614	0.607337	0.67301
AT3G47510	0.865986	0.992506
AT3G47543	0.934984	1.1266
AT3G48231	0.687016	0.756134	LCR48
AT3G48237	0.805782	1.13014
AT3G48940	0.51991	0.491733
AT3G49300	0.735	0.641001
AT3G49305	0.565234	0.60086
AT3G49780	0.756306	0.856802	PSK4
AT3G50570	0.865871	0.554003
AT3G50610	0.751635	0.787552	CEP9
AT3G51075	0.747099	0.836911
AT3G51210	0.907463	0.932806
AT3G51600	0.628445	0.525179	LTP5
AT3G51810	0.658627	0.487767	EM1
AT3G53010	0.643783	0.473142
AT3G55677	0.568683	0.642687
AT3G55790	0.723155	0.494872
AT3G55930	0.647587	0.558013
AT3G56220	0.653322	0.681939
AT3G56980	0.74549	0.661258	BHLH39
AT3G57510	0.617147	0.64808	ADPG1
AT3G60140	0.661488	0.373478	DIN2
AT3G61120	0.500144	0.48494	AGL13
AT3G61185	1.21288	1.0269
AT3G61898	0.73998	0.74247
AT3G62380	0.891402	0.819111
AT3G62960	0.589191	0.444119	ROXY8
AT3G66656	0.561707	0.625772	AGL91
AT4G00467	0.545939	0.56256
AT4G01380	0.679	0.526108
AT4G01650	0.825963	0.925861
AT4G02317	0.992649	0.874292
AT4G02871	0.748204	0.870724
AT4G03038	0.785541	0.72881
AT4G03063	0.561433	0.501673
AT4G04745	0.708278	0.591231
AT4G04830	0.576891	0.45531	MSRB5
AT4G04900	0.669483	0.617757	RIC10
AT4G05430	0.585537	0.604799
AT4G05494	0.540438	0.355671
AT4G06534	0.558436	0.480521
AT4G09644	0.836777	0.918145
AT4G09647	1.08578	1.08149
AT4G09890	0.78928	0.759556
AT4G09984	1.05169	1.08377	LCR34
AT4G10201	0.781866	0.854804
AT4G10290	0.536228	0.673407
AT4G10457	0.641305	0.760777	SCRL1
AT4G11653	1.30704	1.53921	RALFL29
AT4G11730	0.574991	0.48814
AT4G11760	0.641938	0.699936	LCR17
AT4G11880	0.643308	0.69308	AGL14
AT4G12510	0.80118	0.642257	AZI5
AT4G12890	0.69251	0.695439
AT4G13790	0.511638	0.458123	SAUR25
AT4G13820	0.758092	0.80049
AT4G13955	0.595447	0.629297
AT4G13968	1.30422	1.08211
AT4G14020	0.84814	0.88938
AT4G14165	0.632206	0.423576	ATFDB25
AT4G14743	0.730457	0.573802
AT4G15056	0.687382	0.761039
AT4G15393	0.517012	0.435105	CYP702A5
AT4G15620	0.595695	0.536097	CASPL1E2
AT4G15630	0.751891	0.68754	CASPL1E1
AT4G15733	0.516386	0.635556	SCRL11
AT4G16215	0.701402	0.46004
AT4G16267	0.624233	0.870013
AT4G16270	0.653312	0.530473	PRX40
AT4G17713	0.612886	0.773003
AT4G17850	0.578847	0.553956
AT4G17930	0.58671	0.703878
AT4G18282	0.554261	0.697043
AT4G18850	0.544555	0.555148
AT4G18870	0.825375	0.702337
AT4G18960	0.572391	0.576091	AG
AT4G19260	0.621963	0.509367
AT4G19340	0.708761	0.720698
AT4G19810	0.502069	0.441187	ChiC
AT4G19905	0.510888	0.803924	LCR38
AT4G20100	0.667504	0.399407
AT4G20250	0.849884	0.706983
AT4G20970	0.512483	0.489064
AT4G21000	0.633556	0.655447	ACA6
AT4G21363	0.641566	0.890136
AT4G21780	0.735809	0.823912
AT4G21910	0.533967	0.485011
AT4G22060	0.524499	0.662999	ATFDB29
AT4G22210	0.844425	0.676491	LCR85
AT4G22233	0.855848	0.652729
AT4G22235	0.552412	0.34569
AT4G22517	0.887318	0.746546
AT4G22640	0.614411	0.378306
AT4G22950	0.512965	0.506825	AGL19
AT4G24050	0.684663	0.703796
AT4G24980	0.53892	0.4535	UMAMIT16-PSI
AT4G25400	0.520822	0.531715
AT4G26260	0.527904	0.412781	MIOX4
AT4G27250	0.810699	0.803768
AT4G28775	0.788155	0.907942
AT4G29033	0.823293	0.714582
AT4G29103	0.92658	0.824836
AT4G29273	1.0293	1.17684	LCR23
AT4G29283	0.879455	0.907189	LCR21
AT4G29300	0.876184	0.928419	LCR27
AT4G29980	0.620871	0.572805
AT4G30072	0.81024	0.820075
AT4G30074	0.767448	0.686888	LCR19
AT4G30180	0.715372	0.53504
AT4G30420	0.521562	0.588219	UMAMIT34
AT4G30975	0.510803	0.403497
AT4G32342	0.587597	0.82314
AT4G32375	0.63368	0.637399
AT4G32980	0.585362	0.536718	ATH1
AT4G33720	0.510143	0.361819	ATCAPE3
AT4G34210	0.757816	0.661089	SK11
AT4G34419	0.70303	0.491342
AT4G34750	0.54797	0.437206	SAUR49
AT4G34970	0.689365	0.598282	ADF9
AT4G35400	0.54509	0.317658
AT4G35670	0.525869	0.391035
AT4G35725	0.776993	0.68597
AT4G36110	0.7083	0.718419	SAUR9
AT4G36170	0.538041	0.580629
AT4G37570	0.634532	0.438252
AT4G37710	0.58799	0.543174	VQ29
AT4G38860	0.582353	0.448478	SAUR16
AT4G39020	0.635002	0.567664
AT4G39060	0.636733	0.404372
AT4G39770	0.707665	0.784939	TPPH
AT5G02440	0.835233	0.903493
AT5G02640	0.712185	0.46866
AT5G03710	0.577007	0.726465
AT5G03837	0.877828	0.857453
AT5G04030	0.748802	0.714584
AT5G04350	0.54424	0.329512
AT5G05030	0.539784	0.588132
AT5G05430	0.515536	0.43762
AT5G05598	2.44648	2.96353
AT5G06620	0.571038	0.589522	SDG38
AT5G06790	0.557413	0.628713
AT5G07225	0.675431	0.735729
AT5G07572	1.12455	1.34923
AT5G09480	0.547299	0.440384
AT5G09910	0.656304	0.54782
AT5G09940	0.868371	0.685249
AT5G10000	0.772847	0.729458	FD4
AT5G10170	0.722197	0.821745	MIPS3
AT5G10946	0.565929	0.448111
AT5G11660	0.58234	0.600058
AT5G11830	0.584127	0.434097
AT5G12235	0.520958	0.76673	CLE22
AT5G13130	0.566522	0.485943	MORC5
AT5G16567	1.10287	1.20627
AT5G17480	0.780093	0.638084	PC1
AT5G17795	0.618756	0.547929
AT5G18290	0.666494	0.215446	SIP1;2
AT5G18460	0.505273	0.560356
AT5G18600	0.585128	0.50116	ROXY10
AT5G19710	0.64482	0.61413
AT5G19800	0.594515	0.602828	HRGP2
AT5G20240	0.574806	0.615105	PI
AT5G21125	0.960166	0.864664
AT5G22090	0.746961	0.627444	EAR1
AT5G22270	0.545702	0.889353	SIED1
AT5G22555	0.694506	0.824334
AT5G23212	1.31698	1.44278
AT5G23840	0.505163	0.527322
AT5G24065	0.587818	0.562339
AT5G24105	0.78483	0.838163	AGP41
AT5G24205	0.522214	0.592469
AT5G26015	0.849174	1.01552
AT5G26146	0.73293	0.721784
AT5G26330	0.566788	0.437593
AT5G26805	0.744323	0.85422
AT5G27035	1.47572	1.36261
AT5G27530	0.555862	0.515112
AT5G27880	0.596927	0.575205
AT5G28240	0.571649	0.404221
AT5G28360	1.07574	0.940639	ACS3
AT5G33365	1.00337	0.758768
AT5G35860	0.545066	0.332348
AT5G36240	0.578894	0.518419
AT5G37030	0.517621	0.580365
AT5G38080	0.815624	0.870081
AT5G38090	0.602516	0.674594
AT5G38180	0.788492	1.22211
AT5G38230	0.551776	0.57973
AT5G38317	0.586873	0.512202	LCR58
AT5G39160	0.892555	0.757982
AT5G39635	0.766603	0.874291	MIR169C
AT5G40020	0.555593	0.517236
AT5G40330	0.547361	0.595703	MYB23
AT5G40348	0.592016	0.628191
AT5G40630	0.808545	0.823717
AT5G40900	0.728474	0.824756
AT5G41300	0.600373	0.651878
AT5G41430	0.722678	0.779707	ATL85
AT5G41450	0.809671	0.785033	ATL87
AT5G42170	0.983046	1.01452
AT5G43185	0.5875	0.641894
AT5G43285	0.816964	0.748168	LURE1.1
AT5G43570	1.30198	1.01507
AT5G43580	1.412	1.1721	UPI
AT5G43650	0.657084	0.741	BHLH92
AT5G44020	0.513062	0.37358
AT5G44470	0.774741	0.694078
AT5G44570	0.552222	0.406305	CWM2
AT5G44980	0.626846	0.687328
AT5G45960	0.557222	0.583125
AT5G46010	0.787098	0.891912
AT5G46200	0.672988	0.728804
AT5G46873	0.593363	0.635714
AT5G46874	0.653563	0.667917
AT5G46877	0.773893	0.900236
AT5G46900	0.665257	0.669542
AT5G48000	0.53966	0.519021	CYP708A2
AT5G49790	0.757858	0.347497
AT5G50801	0.843476	0.80015
AT5G51845	0.950089	1.06206
AT5G52150	0.570802	0.503641
AT5G52260	0.514524	0.608657	MYB19
AT5G52490	0.786249	0.723018
AT5G52605	0.768621	0.841721
AT5G52670	0.619979	0.753594
AT5G52720	0.575913	0.627517
AT5G52760	0.861756	1.05479
AT5G53200	0.572208	0.517823	TRY
AT5G53205	0.908946	1.11171
AT5G53910	0.564243	0.571162
AT5G54215	0.932406	0.806959
AT5G54220	0.998963	1.07081
AT5G54480	0.584027	0.601023
AT5G54790	0.536583	0.541548	VUP4
AT5G55890	0.735639	0.705782	ATDOB17
AT5G56070	0.628193	0.504615
AT5G56110	0.835481	0.843599	MYB80
AT5G56367	0.555075	0.480724
AT5G56640	0.583592	0.687543	MIOX5
AT5G57400	0.566123	0.60856
AT5G57520	0.536469	0.366732	ZFP2
AT5G57750	0.683995	0.349087	ATL50
AT5G58784	0.604796	0.369897
AT5G59105	0.536184	0.613171
AT5G59360	0.550118	0.491784	SMR113
AT5G60810	0.590991	0.502427	RGF1
AT5G61605	0.533251	0.583895	PCP-BALPHA
AT5G61620	0.565639	0.612904
AT5G61630	0.570594	0.473511
AT5G62830	0.758147	0.629519
AT5G63087	0.754456	0.810852
AT5G63090	0.510234	0.373408	LOB
AT5G63140	0.777831	0.504816	PAP29
AT5G63230	0.956309	0.749397
AT5G63250	0.963463	1.01699
AT5G63660	0.642815	0.473768	PDF2.5
AT5G64770	0.876695	0.885549	RGF9
AT5G64800	0.701488	0.757764	CLE21
AT5G64810	0.600059	0.57642	WRKY51
AT5G65140	0.876164	0.86359	TPPJ
AT5G66590	0.804571	0.795313
AT5G67010	0.537635	0.306445

## Sheet: K27_3h_Loss
Supplementary Table 3
(F) Genes losing H3K27me3 after 3h of cold exposure
Gene	log2FCNvs3h	log2FCNvs3d	Name
AT1G02180	-0.568731	-0.573964
AT1G02540	-0.981887	-0.915471
AT1G05880	-0.638193	-0.695706	ARI12
AT1G07500	-0.633194	-0.397328	SMR5
AT1G07870	-0.58585	-0.847614
AT1G11482	-0.696839	-0.711072
AT1G12855	-0.546604	-0.532549
AT1G16760	-0.856257	-0.841384
AT1G20350	-0.778268	-0.822371	TIM17-1
AT1G20790	-0.514046	-0.62247
AT1G21250	-0.716625	-0.856323	WAK1
AT1G22065	-0.905998	-0.697083
AT1G22150	-0.500692	-0.513289	SULTR1;3
AT1G23140	-0.803845	-0.920626	CAR8
AT1G24405	-0.630448	-0.559638
AT1G26815	-0.624365	-0.139228
AT1G28130	-1.13571	-1.04663	GH3.17
AT1G30660	-0.501953	-0.408636	TWINKY
AT1G31400	-0.645087	-0.647928
AT1G31993	-0.553618	-0.749555
AT1G33220	-0.900969	-0.980191
AT1G44608	-0.679155	-0.480059
AT1G47460	-1.37946	-1.07532
AT1G47590	-0.50511	-0.446296	PUP20
AT1G48060	-0.798191	-0.697584
AT1G48580	-0.700344	-0.812503
AT1G53633	-0.744608	-0.785262
AT1G53680	-1.45754	-1.05794	GSTU28
AT1G56242	-0.51488	-0.302822
AT1G56510	-0.573164	-0.370184	WRR4
AT1G59970	-0.647706	-0.777493	AT5-MMP
AT1G60290	-0.814027	-0.513237
AT1G61260	-1.01936	-0.556092
AT1G61600	-0.632208	-0.917182
AT1G62550	-1.17839	-1.27601
AT1G65210	-0.639771	-0.56883
AT1G65484	-0.615916	-0.430497	STMP3
AT1G65485	-0.566446	-0.422147
AT1G66060	-0.677617	-0.641886
AT1G68526	-0.946863	-1.22526
AT1G68640	-0.660625	-0.575802	PAN
AT1G69470	-0.550178	-0.800916
AT1G70640	-0.948677	-0.569769
AT1G72870	-0.52013	-0.448896
AT1G78390	-0.63976	-0.634029	NCED9
AT1G78950	-0.635745	-0.575005	BAS
AT1G80520	-0.567786	-0.564332
AT1G80660	-0.501677	-0.595961	HA9
AT2G02026	-1.40265	-1.31511
AT2G02990	-0.524105	-0.318565	RNS1
AT2G05520	-0.525399	-0.465147	GRP-3
AT2G05970	-0.749743	-0.655811	ATFDB12
AT2G16320	-0.632683	-0.485727
AT2G18450	-0.539027	-0.509217	SDH1-2
AT2G25130	-0.612472	-0.593969
AT2G25470	-0.622373	-0.608095	RLP21
AT2G29150	-0.516089	-0.372221
AT2G29654	-0.969259	-0.950911
AT2G29880	-0.862388	-0.669445
AT2G32670	-0.540304	-0.517564	VAMP725
AT2G33640	-1.51375	-1.50769	PAT21
AT2G35570	-0.661931	-0.861274
AT2G37210	-0.929837	-0.874134	LOG3
AT2G39350	-0.730068	-0.538441	ABCG1
AT2G40030	-0.729404	-0.642249	NRPD1B
AT2G41970	-0.997999	-1.03324	MRI
AT2G43865	-0.796429	-0.501296
AT2G45450	-0.793494	-0.641751	ZPR1
AT3G02000	-0.846078	-1.13971	ROXY1
AT3G10572	-1.00516	-0.618566	APEM9
AT3G14540	-0.643833	-0.611065	TPS19
AT3G18660	-0.769364	-0.803697	PGSIP1
AT3G22232	-0.75687	-0.696328
AT3G22490	-0.522743	-0.56167	ATRAB28
AT3G23470	-0.602186	-0.453037
AT3G25090	-0.708029	-0.887211
AT3G26280	-0.620045	-0.452862	CYP71B4
AT3G26782	-0.792882	-0.556504
AT3G27720	-0.508736	-0.390228	ARI4
AT3G27886	-0.557654	-0.450724
AT3G28510	-1.00286	-1.03841
AT3G44718	-0.628954	-0.481814
AT3G45060	-0.526913	-0.482563	NRT2.6
AT3G45510	-0.604558	-0.623887
AT3G45960	-0.551825	-0.60517	EXLA3
AT3G48770	-0.591794	-0.6509
AT3G50280	-1.3618	-1.51375
AT3G50300	-0.942993	-1.13342
AT3G52310	-0.657171	-0.743893	ABCG27
AT3G52600	-0.51356	-0.571958	CWINV2
AT3G59160	-0.576515	-0.490633
AT4G00200	-1.96018	-1.8648	AHL7
AT4G00380	-0.731669	-0.830219	FDM2
AT4G01490	-0.747612	-0.932538
AT4G01740	-0.832536	-0.705258
AT4G05497	-0.648999	-0.629607
AT4G09775	-1.20644	-0.949485
AT4G09784	-0.847877	-0.854293
AT4G10150	-0.529929	-0.404401	ATL07
AT4G10265	-0.834217	-0.931971	WIP3
AT4G10530	-0.781973	-0.884007
AT4G10695	-0.765996	-0.843209
AT4G10700	-0.800279	-0.827645
AT4G11550	-0.516753	-0.504695
AT4G14820	-0.675454	-0.588522
AT4G18930	-0.5867	-0.568317
AT4G22415	-0.75823	-0.865769
AT4G23160	-0.566393	-0.535486	CRK8
AT4G25420	-0.859214	-0.78212	GA20OX1
AT4G28405	-0.959858	-0.833418
AT4G30030	-0.509749	-0.60913
AT4G32170	-0.962829	-0.956856	CYP96A2
AT4G35640	-0.593747	-0.412494	SERAT3;2
AT4G35731	-0.639457	-0.591619
AT4G36268	-0.62799	-0.498321
AT5G05300	-0.695797	-0.457936	IDL6
AT5G07180	-0.529421	-0.376806	ERL2
AT5G09980	-0.788106	-0.594568	PROPEP4
AT5G10430	-0.63527	-1.25106	AGP4
AT5G12050	-0.947783	-0.857521	BG1
AT5G15790	-0.533695	-0.373789
AT5G17760	-0.734009	-0.878676
AT5G25010	-0.79204	-0.782383
AT5G26345	-1.28354	-1.07657
AT5G28463	-1.39786	-1.64873
AT5G38310	-0.516284	-0.331225
AT5G39550	-0.650308	-0.608824	VIM3
AT5G39645	-1.0254	-0.649759
AT5G41580	-0.64483	-0.395671	PIAL2
AT5G42445	-0.602917	-0.268405
AT5G43780	-1.69982	-1.38078	APS4
AT5G44255	-0.823722	-0.760337
AT5G44390	-0.512653	-0.498968	ATBBE25
AT5G49500	-1.17298	-0.975346
AT5G49760	-0.514043	-0.388732	HPCA1
AT5G49850	-0.507548	-0.529711
AT5G51920	-0.79387	-0.864817
AT5G52450	-0.589793	-0.61793
AT5G53240	-0.835927	-0.920644	ATDOB7
AT5G53990	-1.28969	-1.27354
AT5G54148	-0.704746	-0.716077
AT5G54150	-0.689648	-0.678769
AT5G55330	-0.700464	-0.923214
AT5G56050	-0.504382	-0.476867	NHL43
AT5G61470	-0.919591	-0.834295
AT5G65510	-0.621298	-0.600241	AIL7

## Sheet: K27_3d_Gain
Supplementary Table 3
(G) Genes gaining H3K27me3 after 3d of cold exposure
Gene	log2FCNvs3h	log2FCNvs3d	Name
AT1G02340	0.470724	0.59924	HFR1
AT1G02950	1.15345	1.16108	GSTF4
AT1G03820	0.552255	0.546964
AT1G03982	0.531196	0.606548
AT1G05510	0.720474	0.862268	OBAP1A
AT1G05730	0.455739	0.590944
AT1G06225	0.790448	0.90392	CLE3
AT1G06360	0.722986	0.62687
AT1G06820	0.471103	0.565842	CRTISO
AT1G07175	0.597737	0.508609
AT1G07485	1.19144	1.13253
AT1G08465	0.561007	0.607093	YAB2
AT1G08670	0.480615	0.514894
AT1G08810	0.719425	0.811692	MYB60
AT1G09176	0.825783	0.753948
AT1G09480	0.73774	0.808088
AT1G09483	0.770727	0.871619	ATNEAP4
AT1G10585	0.454765	0.524574
AT1G10586	0.58525	0.612378
AT1G10745	1.32392	1.04811	ESF1.2
AT1G10747	0.787654	0.811571	ESF1.1
AT1G11990	0.595879	0.581459
AT1G12540	0.658678	0.688345
AT1G12660	0.446612	0.510381
AT1G12663	0.667908	0.824224
AT1G12667	0.678513	0.723533
AT1G13590	0.592528	0.6431	PSK1
AT1G13609	0.821668	0.6834
AT1G13620	0.535449	0.717774	RGF2
AT1G14220	0.495686	0.52037
AT1G15550	0.653904	0.583453	GA3OX1
AT1G17060	0.665308	0.640871	CYP72C1
AT1G17710	0.49626	0.518625	PEPC1
AT1G18790	0.513997	0.535038	RKD1
AT1G19510	0.840793	0.899951	RL5
AT1G19830	0.655654	0.633688	SAUR54
AT1G20135	0.630496	0.531658
AT1G20290	0.506047	0.570948
AT1G21323	0.567486	0.507358
AT1G21430	0.48962	0.550055	YUC11
AT1G21490	0.557957	0.617202
AT1G21550	0.567224	0.654227
AT1G21864	0.569381	0.538308
AT1G21910	0.79376	0.850986	DREB26
AT1G21973	1.15198	1.21871
AT1G23145	0.809916	0.900456	RALFL2
AT1G23410	0.582937	0.638239	RPS27AA
AT1G23500	0.735185	0.786242
AT1G23520	0.487907	0.540587
AT1G23560	0.562033	0.619847
AT1G24000	0.506315	0.52111
AT1G24060	0.502129	0.591274
AT1G24148	0.558803	0.533531
AT1G24657	0.585797	0.653461
AT1G26200	0.629236	0.742702
AT1G26240	0.579155	0.506634	EXT19
AT1G26310	0.500905	0.518051	CAL
AT1G27890	0.45569	0.627123	CAF1D
AT1G27990	0.797622	0.786966
AT1G28305	0.877997	0.87699
AT1G28375	0.52496	0.563964
AT1G28465	0.773544	0.772281
AT1G28630	0.557521	0.616691
AT1G29179	0.662002	0.6997
AT1G29270	0.439103	0.549032
AT1G30040	0.609772	0.64838	GA2OX2
AT1G30220	0.471826	0.622726	INT2
AT1G30795	0.704223	0.551548
AT1G31040	0.532243	0.641555	ORE15
AT1G32280	0.992538	0.973209	END1
AT1G32975	0.513581	0.569473
AT1G33300	0.499524	0.680081
AT1G33320	0.488255	0.586576
AT1G33740	0.628795	0.653488
AT1G33820	0.4268	0.546991
AT1G33830	0.387407	0.510562	IAN1
AT1G33835	0.468502	0.594398
AT1G33890	0.492274	0.50206	IAN3
AT1G33950	0.66305	0.755049	IAN7
AT1G34044	0.646668	0.759869
AT1G34440	0.635674	0.669664
AT1G35170	0.53686	0.576335
AT1G35240	0.597081	0.664943	ARF20
AT1G35537	0.749662	1.07988	ATPDFL2.1
AT1G35545	0.859172	0.840208
AT1G42560	0.568206	0.76915	MLO9
AT1G44010	0.426331	0.531983
AT1G44075	0.703644	0.59735
AT1G44286	0.52419	0.636827
AT1G46336	0.862496	0.950212
AT1G46912	0.791007	0.885546
AT1G47786	0.594379	0.658187
AT1G47813	0.880531	1.03952
AT1G48070	0.729791	0.709436
AT1G48325	0.705966	0.81973
AT1G48530	0.248921	0.506351
AT1G48698	0.636474	0.707141
AT1G48810	0.454744	0.521976
AT1G49310	0.570257	0.689932
AT1G49475	0.769759	0.764664
AT1G49800	0.653757	0.731307	PREPIPL1
AT1G49938	0.656251	0.695816
AT1G50080	0.728855	1.16544
AT1G50220	0.448311	0.53829
AT1G51460	0.582531	0.583935	ABCG13
AT1G51930	0.286335	0.505385	ATL88
AT1G51970	0.603044	0.679565
AT1G52191	0.612649	0.654575
AT1G52211	0.607041	0.709222
AT1G52410	0.57887	0.606777	TSA1
AT1G52460	0.528978	0.594546
AT1G52470	0.42187	0.520795
AT1G52827	0.670289	0.656623	CDT1
AT1G52840	0.510333	0.544319
AT1G53420	0.408874	0.526478
AT1G53683	1.03567	0.910151	MIR169D
AT1G53687	0.583275	0.584773	MIR169E
AT1G53930	0.58814	0.566834
AT1G54600	2.00372	2.83898
AT1G54620	0.428751	0.532774
AT1G54720	0.668023	0.813788
AT1G54950	0.565727	0.667429
AT1G55010	0.64693	0.716912	PDF1.5
AT1G55220	1.01364	0.692869
AT1G55604	0.533342	0.569827
AT1G56160	0.748107	0.834941	MYB72
AT1G56553	0.53682	0.583211
AT1G56555	0.561432	0.673898
AT1G58225	0.726845	0.855266
AT1G58390	0.483777	0.549397
AT1G60330	0.744617	0.855536
AT1G60815	0.918111	1.1711	RALFL7
AT1G61060	0.348457	0.515686
AT1G61255	0.56575	0.559957
AT1G61566	0.567984	0.56945	RALFL9
AT1G62760	0.573384	0.569516	ATPMEI10
AT1G62975	0.690336	0.764769
AT1G63057	0.54352	0.685215
AT1G63295	0.889203	0.908762
AT1G64000	0.51882	0.555226	WRKY56
AT1G64360	0.792087	0.777395	SAQR
AT1G64480	0.615785	0.653814	CBL8
AT1G64618	0.513052	0.564405
AT1G65352	0.65555	0.838135
AT1G65390	0.654265	0.81776	PP2-A5
AT1G65481	0.585188	0.756908
AT1G65483	0.486904	0.532023
AT1G65490	0.441182	0.623795	STMP5
AT1G66010	0.603962	0.524225
AT1G66400	0.597415	0.828811	CML23
AT1G66725	0.835259	0.865283	MIR163
AT1G66852	0.668512	0.675139
AT1G66855	0.681717	0.843207
AT1G67025	0.810364	0.833216
AT1G67195	0.604075	0.680078	MIR414
AT1G67200	0.398429	0.592443
AT1G67330	1.15956	1.13566	AGM2
AT1G67775	0.583349	0.535841	CLE8
AT1G67875	0.713689	0.708975
AT1G68210	0.514216	0.592196	APRR6
AT1G68825	0.559284	0.526987	RTFL15
AT1G68960	0.428603	0.501764	ATDOA5
AT1G69110	0.549572	0.5927
AT1G69818	1.10507	1.20442
AT1G70030	0.825697	0.933353
AT1G70885	0.52416	0.527981
AT1G71470	0.407516	0.771993
AT1G72580	0.916418	0.881965
AT1G73600	0.816943	0.814584	NMT3
AT1G73610	0.529973	0.568879
AT1G73805	0.777032	0.61164	SARD1
AT1G73830	0.877003	0.657301	BEE3
AT1G75480	0.589014	0.605613
AT1G75500	0.669702	0.535294	WAT1
AT1G75900	0.507388	0.546061
AT1G76210	0.42719	0.545494
AT1G76910	1.24415	0.735069
AT1G76952	1.28961	1.13126	IDL5
AT1G76960	0.704612	0.873239
AT1G77520	0.570131	0.546636
AT1G77980	0.576356	0.597143	AGL66
AT1G78476	0.631645	0.750341
AT1G79520	0.515989	0.502556
AT2G01300	0.360772	0.577339
AT2G01370	0.851734	0.791334
AT2G01372	0.557793	0.650578
AT2G01580	0.55312	0.621541
AT2G01918	0.347136	0.574381	PQL3
AT2G02060	0.594989	0.705497
AT2G02140	0.759799	0.821517	LCR72
AT2G03320	0.858324	0.793666
AT2G03360	0.497409	0.606992
AT2G03720	0.925316	0.843632	MRH6
AT2G03822	0.683676	0.77854
AT2G03860	0.58662	0.617588
AT2G04025	0.723985	0.749568	RGF3
AT2G04046	0.737725	0.686045
AT2G04047	0.799499	0.722865
AT2G04140	0.795119	0.655045
AT2G04150	0.574649	0.627625
AT2G05430	0.547595	0.575363
AT2G05530	0.62031	0.616913
AT2G05910	0.606874	0.710068
AT2G06020	0.524856	0.751391
AT2G10450	0.781841	0.752602
AT2G14282	0.720455	0.795181	SCRL18
AT2G15310	0.471232	0.511528	ARFB1A
AT2G15600	0.529057	0.552258
AT2G15765	0.464215	0.551484
AT2G16225	1.12103	1.0179
AT2G16380	0.373367	0.523387
AT2G16580	0.41038	0.592101	SAUR8
AT2G16905	0.580097	0.619364
AT2G16990	0.471708	0.552735
AT2G17070	0.595868	0.623467
AT2G18210	0.84574	0.844127
AT2G18328	0.747887	0.622576	RL4
AT2G18969	0.809501	1.33923
AT2G19150	0.573121	0.512512
AT2G19460	0.503751	0.685218
AT2G19893	0.61231	0.651974
AT2G20618	0.290464	0.600339
AT2G20805	0.892876	0.866535
AT2G20993	0.681631	0.68951
AT2G21020	0.532419	0.622127
AT2G21045	0.380152	0.573594	HAC1
AT2G21610	0.461506	0.534499	PE11
AT2G21890	0.590109	0.506184	CAD3
AT2G21900	0.545113	0.580963	WRKY59
AT2G21905	0.711652	0.669568
AT2G21980	0.724051	0.677198
AT2G22140	0.603064	0.615825	EME1B
AT2G22145	0.543708	0.620005
AT2G22160	0.724511	0.711151
AT2G22190	0.554468	0.674901	TPPE
AT2G22630	0.50082	0.551927	AGL17
AT2G22770	0.484084	0.620181	NAI1
AT2G22807	0.564633	0.53013
AT2G22942	0.948575	1.08892
AT2G22955	0.539739	0.705916
AT2G22960	0.711928	0.851386	FPT2
AT2G22970	0.533062	0.780797	SCPL11
AT2G23030	0.504483	0.617241	SNRK2.9
AT2G23130	0.605697	0.624594	AGP17
AT2G23990	0.611883	0.625586	ENODL11
AT2G24000	0.544663	0.57981	scpl22
AT2G24210	0.580756	0.553932	TPS10
AT2G24748	0.514097	0.606543
AT2G24880	0.926704	1.06293
AT2G24950	0.737056	0.695911
AT2G25390	0.692184	0.598791
AT2G25410	0.603511	0.670078	ATL22
AT2G25697	0.697436	0.753861
AT2G25780	0.66826	0.661903
AT2G25975	0.749903	0.791095
AT2G26010	0.641675	0.624317	PDF1.3
AT2G26580	0.731616	0.736349	YAB5
AT2G26860	0.385676	0.625973
AT2G26880	0.846326	0.734076	AGL41
AT2G27140	0.630679	0.526631
AT2G27375	0.426888	0.517806
AT2G27520	0.522754	0.548073
AT2G27535	0.598451	0.758779
AT2G27936	1.10171	1.00811
AT2G28090	0.530271	0.58543	ATHMP17
AT2G28210	0.943317	0.945768	ACA2
AT2G28870	0.638106	0.610689	SMR10
AT2G29045	0.790386	0.69425	LCR62
AT2G29125	0.555863	0.628185	RTFL2
AT2G29370	0.643897	0.646136
AT2G30230	0.666117	0.586472
AT2G30420	1.04927	1.09007	ETC2
AT2G30432	0.0685358	0.503206	TCL1
AT2G30690	0.477619	0.640225	MYOB4
AT2G30766	0.59034	0.694891	FEP1
AT2G30890	0.424716	0.566982
AT2G31030	0.416456	0.549766	ORP1B
AT2G31110	0.499633	0.59983
AT2G31180	0.642723	0.739695	MYB14
AT2G31220	0.24926	0.521802	BHLH010
AT2G31460	0.884939	0.73098
AT2G31550	0.631017	0.541618
AT2G31930	0.59248	0.722715
AT2G32275	0.53121	0.608139
AT2G32470	0.534625	0.506123
AT2G32698	0.625413	0.50636	MIR407
AT2G32788	0.422838	0.608816
AT2G32835	0.430417	0.574268	RALFL16
AT2G32885	0.549181	0.566721
AT2G32890	1.14737	0.686457	RALFL17
AT2G33385	0.541938	0.628943	arpc2b
AT2G33509	1.09641	1.3414
AT2G33520	0.506933	0.578802	ATHCYSTM7
AT2G33710	0.339504	0.525592
AT2G34060	0.812119	0.859333
AT2G34180	0.443085	0.557045	CIPK13
AT2G34800	0.686534	0.771978
AT2G34825	0.627927	0.657244	RALFL20
AT2G34925	0.675728	0.814161	CLE42
AT2G35290	0.323122	0.575298	SAUR79
AT2G35637	1.01896	1.18973
AT2G35640	0.518424	0.550504
AT2G35810	0.493149	0.55683
AT2G36020	0.430385	0.55167	HVA22J
AT2G36040	0.921852	1.16259
AT2G36255	0.777548	0.846697
AT2G36792	0.97696	1.37805
AT2G36940	0.374621	0.547085
AT2G37540	0.773568	0.981622
AT2G38170	0.518188	0.612625	CAX1
AT2G39410	0.482556	0.559179	MAGL7
AT2G39540	0.640304	0.65907
AT2G39590	0.74089	0.68156
AT2G39830	0.52285	0.550798	DAR2
AT2G39855	0.482798	0.58544
AT2G40530	0.590889	0.541599
AT2G40745	0.641125	0.701872
AT2G40955	0.808936	0.708276
AT2G41230	0.867249	0.62304	OSR1
AT2G41270	0.441289	0.554221
AT2G41415	0.774132	0.591738
AT2G41610	0.662887	0.789337	DICE1
AT2G41930	0.613995	0.637172	NIT1
AT2G41997	0.806516	0.903918	LCR51
AT2G42425	0.942691	0.940597
AT2G42820	0.757153	0.799468	HVA22F
AT2G42830	0.448843	0.506974	SHP2
AT2G42835	0.615737	0.734655
AT2G42850	0.517065	0.60039	CYP718
AT2G43255	0.664886	0.9034
AT2G43510	0.604954	0.559871	TI1
AT2G43530	0.364135	0.637721
AT2G43535	0.370793	0.76919
AT2G43670	0.624144	0.510294
AT2G43740	0.465726	0.583256
AT2G44030	0.559008	0.518036
AT2G44480	0.311179	0.572917	BGLU17
AT2G44745	0.756365	0.76913	WRKY12
AT2G44798	0.684024	0.544954
AT2G45190	0.504655	0.578609	AFO
AT2G45412	0.538344	0.820344
AT2G45780	0.688609	0.602217
AT2G45840	0.578842	0.509489
AT2G46255	0.632162	0.576621	MIR159C
AT2G47240	0.653306	0.739309	LACS1
AT3G01185	0.696137	0.718334
AT3G01326	0.624384	0.653447
AT3G01860	0.628398	0.535883
AT3G01961	0.514828	0.643161
AT3G02150	0.37599	0.536253	PTF1
AT3G02242	0.581399	0.661213	GLV8
AT3G02493	0.475278	0.579559	RTFL19
AT3G02610	0.663398	0.774127	AAD2
AT3G02940	0.666477	0.666197	MYB107
AT3G02980	0.771135	0.898599	MCC1
AT3G03410	0.635333	0.64633
AT3G04765	1.12885	1.14407	MIR167C
AT3G05300	0.458701	0.556365
AT3G05327	0.517896	0.594641
AT3G05370	0.465565	0.522473	RLP31
AT3G05460	0.585496	0.627492
AT3G05860	0.692368	0.665081	AGL45
AT3G06435	0.686372	0.544125
AT3G06437	0.806764	0.533088
AT3G10780	0.528499	0.54051
AT3G10900	0.76078	0.56242
AT3G11480	0.507993	0.556487	BSMT1
AT3G12502	0.688862	0.687348
AT3G12955	0.862826	0.686672	SAUR74
AT3G13435	0.538444	0.718197
AT3G13590	0.585102	0.547251
AT3G13898	0.816645	1.01872	EPFL3
AT3G14385	0.436799	0.747687	MIR169F
AT3G14820	0.564808	0.526015
AT3G16360	0.702492	0.648609	AHP4
AT3G16432	0.599794	0.694431
AT3G16930	0.671956	0.676623
AT3G17155	0.356661	0.533555
AT3G17185	0.660441	0.859219	TAS3
AT3G17480	0.431354	0.541728
AT3G17490	0.496613	0.512027
AT3G19310	0.585923	0.540301
AT3G19550	0.687247	0.68599
AT3G20690	0.823938	0.721963
AT3G20978	0.942375	0.888936
AT3G21352	0.545319	0.516602
AT3G21530	0.592292	0.545109
AT3G21590	0.627794	0.747482
AT3G21755	0.784378	0.810388
AT3G21760	0.390819	1.10788	HYR1
AT3G21791	0.684459	0.556663
AT3G21920	0.999887	0.885414
AT3G21930	0.679334	0.67854
AT3G22121	0.808209	0.755626
AT3G22231	0.918782	0.801749	PCC1
AT3G22275	0.563661	0.64417	JAZ13
AT3G22400	0.547503	0.506844	LOX5
AT3G22886	0.656082	0.886081	MIR167A
AT3G23030	0.362903	0.73646	IAA2
AT3G23090	0.572424	0.694995	WDL3
AT3G23190	0.62775	0.658107
AT3G23320	0.556062	0.617197
AT3G23870	0.754813	0.633942	ENOR3L2
AT3G24068	0.904619	0.875227
AT3G24230	0.620732	0.573917
AT3G24770	0.689699	0.654639	CLE41
AT3G25190	0.583922	0.523245	VTL5
AT3G25265	0.936689	0.940162	LCR4
AT3G25630	0.564404	0.592528
AT3G25795	0.669199	0.710912	TAS4
AT3G26605	0.579727	0.649224
AT3G26815	0.351138	0.502302	MIR169K
AT3G26934	0.768245	0.927916
AT3G27503	1.11022	1.11543	SCRL19
AT3G27660	0.579488	0.65512	OLEO4
AT3G27809	2.18682	1.93425
AT3G27884	0.60733	0.800224	SORF3
AT3G27965	0.981793	1.07037
AT3G28220	0.510636	0.526616
AT3G28260	0.486896	0.506844
AT3G28770	0.386319	0.564529
AT3G28990	0.43547	0.578724
AT3G29070	0.516835	0.59918
AT3G29780	0.95178	0.865214	RALFL27
AT3G29797	0.537146	0.616327
AT3G29798	0.661412	0.518763
AT3G29970	0.503711	0.53176
AT3G30214	0.650787	0.549286
AT3G30260	0.535096	0.553743	AGL79
AT3G30350	0.527775	0.577021	RGF4
AT3G42180	0.825764	0.856708
AT3G42835	0.792576	0.911498
AT3G43190	0.522715	0.557914	SUS4
AT3G43410	0.812148	0.932011
AT3G43420	0.594156	0.609775
AT3G44640	0.495571	0.518759
AT3G44660	0.564392	0.505632	hda10
AT3G44716	0.487055	0.528555
AT3G44717	0.575205	0.695457
AT3G44765	0.505606	0.548531
AT3G44860	0.480336	0.511373	FAMT
AT3G45110	0.716839	0.769987
AT3G45180	0.642112	0.601409	UBL5A
AT3G45248	0.646622	0.587439
AT3G45285	0.569665	0.508246
AT3G45673	0.534235	0.81075
AT3G46070	0.562583	0.501068
AT3G46170	0.450145	0.500797
AT3G46380	0.435874	0.694344
AT3G46390	0.582252	0.576449
AT3G46614	0.607337	0.67301
AT3G46880	0.590327	0.77133
AT3G46901	0.506855	0.721749
AT3G47510	0.865986	0.992506
AT3G47543	0.934984	1.1266
AT3G47710	0.475272	0.635324	BNQ3
AT3G48209	0.57472	0.653482
AT3G48231	0.687016	0.756134	LCR48
AT3G48237	0.805782	1.13014
AT3G48490	0.493876	0.656116
AT3G49300	0.735	0.641001
AT3G49305	0.565234	0.60086
AT3G49780	0.756306	0.856802	PSK4
AT3G50376	0.426117	0.603684
AT3G50570	0.865871	0.554003
AT3G50755	0.44322	0.520891
AT3G50860	0.502056	0.669124	AP-3 ALPHA
AT3G51030	0.373938	0.544556	TRX1
AT3G51070	#DIV/0!	#DIV/0!
AT3G51075	0.747099	0.836911
AT3G51210	0.907463	0.932806
AT3G51220	0.480797	0.527729
AT3G52720	0.427417	0.515475	ACA1
AT3G53550	0.472666	0.580791
AT3G55677	0.568683	0.642687
AT3G56220	0.653322	0.681939
AT3G56980	0.74549	0.661258	BHLH39
AT3G57510	0.617147	0.64808	ADPG1
AT3G57850	0.486512	0.720615
AT3G59370	0.605067	0.648173
AT3G60961	0.768341	0.806079
AT3G61185	1.21288	1.0269
AT3G61898	0.73998	0.74247
AT3G62380	0.891402	0.819111
AT3G63020	0.575198	0.546772
AT3G66656	0.561707	0.625772	AGL91
AT4G00225	0.4517	0.603736
AT4G00467	0.545939	0.56256
AT4G01265	0.629617	0.698792	RS3
AT4G01380	0.679	0.526108
AT4G01650	0.825963	0.925861
AT4G02317	0.992649	0.874292
AT4G02871	0.748204	0.870724
AT4G03038	0.785541	0.72881
AT4G03063	0.561433	0.501673
AT4G03175	0.41985	0.698725
AT4G03565	0.486588	0.591553
AT4G04077	0.565004	0.653968
AT4G04745	0.708278	0.591231
AT4G04900	0.669483	0.617757	RIC10
AT4G05430	0.585537	0.604799
AT4G09644	0.836777	0.918145
AT4G09647	1.08578	1.08149
AT4G09860	0.402833	0.591648
AT4G09920	0.603699	0.534032
AT4G09930	0.634848	0.667057	IAN11
AT4G09984	1.05169	1.08377	LCR34
AT4G10201	0.781866	0.854804
AT4G10240	0.398362	0.584487	BBX23
AT4G10290	0.536228	0.673407
AT4G10457	0.641305	0.760777	SCRL1
AT4G11393	0.46097	0.521628	DEFL202
AT4G11640	0.71406	0.698326	SR
AT4G11642	0.552064	0.580259
AT4G11653	1.30704	1.53921	RALFL29
AT4G11760	0.641938	0.699936	LCR17
AT4G11880	0.643308	0.69308	AGL14
AT4G12510	0.80118	0.642257	AZI5
AT4G12870	0.376934	0.573776
AT4G12890	0.69251	0.695439
AT4G12930	0.621006	0.526863
AT4G12940	0.774074	0.775308
AT4G13330	0.67645	0.610707
AT4G13410	0.423928	0.539525	ATCSLA15
AT4G13494	0.453288	0.535705	MIR863A
AT4G13820	0.758092	0.80049
AT4G13955	0.595447	0.629297
AT4G13968	1.30422	1.08211
AT4G14020	0.84814	0.88938
AT4G14280	0.605633	0.642943
AT4G14743	0.730457	0.573802
AT4G14811	0.985248	2.46442	MIR780A
AT4G15056	0.687382	0.761039
AT4G15070	0.321187	0.51951
AT4G15417	0.489207	0.600138	RTL1
AT4G15620	0.595695	0.536097	CASPL1E2
AT4G15630	0.751891	0.68754	CASPL1E1
AT4G15733	0.516386	0.635556	SCRL11
AT4G15990	0.62524	0.541217
AT4G16267	0.624233	0.870013
AT4G16270	0.653312	0.530473	PRX40
AT4G17713	0.612886	0.773003
AT4G17850	0.578847	0.553956
AT4G17930	0.58671	0.703878
AT4G18282	0.554261	0.697043
AT4G18692	0.226927	0.597694
AT4G18850	0.544555	0.555148
AT4G18870	0.825375	0.702337
AT4G18960	0.572391	0.576091	AG
AT4G19000	0.447073	0.73476	IWS2
AT4G19260	0.621963	0.509367
AT4G19340	0.708761	0.720698
AT4G19790	0.403716	0.559181
AT4G19905	0.510888	0.803924	LCR38
AT4G20220	0.439592	0.504152
AT4G20250	0.849884	0.706983
AT4G20710	0.774225	0.728699
AT4G21000	0.633556	0.655447	ACA6
AT4G21363	0.641566	0.890136
AT4G21780	0.735809	0.823912
AT4G22050	0.484446	0.51932
AT4G22060	0.524499	0.662999	ATFDB29
AT4G22105	0.654573	0.879517	SCRL26
AT4G22233	0.855848	0.652729
AT4G22517	0.887318	0.746546
AT4G22950	0.512965	0.506825	AGL19
AT4G22960	0.350217	0.57753
AT4G23080	0.417653	0.506761
AT4G23882	0.405513	0.511074	ATHMP36
AT4G24050	0.684663	0.703796
AT4G25400	0.520822	0.531715
AT4G27250	0.810699	0.803768
AT4G28395	0.610354	0.640022	A7
AT4G28775	0.788155	0.907942
AT4G29033	0.823293	0.714582
AT4G29273	1.0293	1.17684	LCR23
AT4G29283	0.879455	0.907189	LCR21
AT4G29300	0.876184	0.928419	LCR27
AT4G29980	0.620871	0.572805
AT4G30064	0.414787	0.667052	LCR61
AT4G30072	0.81024	0.820075
AT4G30074	0.767448	0.686888	LCR19
AT4G30180	0.715372	0.53504
AT4G30420	0.521562	0.588219	UMAMIT34
AT4G31260	0.486934	0.551551
AT4G32342	0.587597	0.82314
AT4G32370	0.447671	0.504373
AT4G32375	0.63368	0.637399
AT4G32785	0.818033	0.588271
AT4G32924	1.05814	1.0462
AT4G32980	0.585362	0.536718	ATH1
AT4G33600	0.489978	0.530619
AT4G34060	0.499046	0.514031	DML3
AT4G34970	0.689365	0.598282	ADF9
AT4G35725	0.776993	0.68597
AT4G35820	0.63823	0.616741
AT4G36110	0.7083	0.718419	SAUR9
AT4G36170	0.538041	0.580629
AT4G37050	0.469394	0.60358	PLP4
AT4G37410	#DIV/0!	#DIV/0!	CYP81F4
AT4G37520	0.332712	0.530194
AT4G37710	0.58799	0.543174	VQ29
AT4G39020	0.635002	0.567664
AT4G39250	0.809634	0.771482	RL1
AT4G39770	0.707665	0.784939	TPPH
AT5G01540	1.72963	2.55483	LECRK-VI.2
AT5G01860	0.605141	0.549949
AT5G02440	0.835233	0.903493
AT5G03710	0.577007	0.726465
AT5G03837	0.877828	0.857453
AT5G04030	0.748802	0.714584
AT5G05030	0.539784	0.588132
AT5G05120	0.746207	0.62901
AT5G05400	0.579718	0.616358
AT5G05598	2.44648	2.96353
AT5G05600	0.683323	0.832411	JOX2
AT5G06620	0.571038	0.589522	SDG38
AT5G06790	0.557413	0.628713
AT5G07225	0.675431	0.735729
AT5G07572	1.12455	1.34923
AT5G09910	0.656304	0.54782
AT5G09940	0.868371	0.685249
AT5G09978	0.419049	0.627933	PEP7
AT5G10000	0.772847	0.729458	FD4
AT5G10140	0.366737	0.538959	FLC
AT5G10170	0.722197	0.821745	MIPS3
AT5G11660	0.58234	0.600058
AT5G12235	0.520958	0.76673	CLE22
AT5G12340	0.507145	0.514912
AT5G13900	0.750414	0.711109	LTPG30
AT5G14602	0.610869	0.666734
AT5G15250	0.407048	0.502476	FTSH6
AT5G16490	0.733145	0.816991	RIC4
AT5G16567	1.10287	1.20627
AT5G16770	0.435645	0.595919	MYB9
AT5G17480	0.780093	0.638084	PC1
AT5G17950	0.578874	0.578901
AT5G18430	0.401147	0.509314
AT5G18460	0.505273	0.560356
AT5G18600	0.585128	0.50116	ROXY10
AT5G19470	0.556136	0.584458	NUDT24
AT5G19710	0.64482	0.61413
AT5G20240	0.574806	0.615105	PI
AT5G20370	0.635113	0.690113
AT5G20440	0.53402	0.663179	MOB1D
AT5G21125	0.960166	0.864664
AT5G22090	0.746961	0.627444	EAR1
AT5G22270	0.545702	0.889353	SIED1
AT5G22410	0.360119	0.522056	RHS18
AT5G22555	0.694506	0.824334
AT5G22810	0.49989	0.664681
AT5G23027	0.740616	0.76953
AT5G23212	1.31698	1.44278
AT5G23235	1.5764	1.38858
AT5G23380	0.466916	0.617705
AT5G23840	0.505163	0.527322
AT5G24065	0.587818	0.562339
AT5G24105	0.78483	0.838163	AGP41
AT5G24205	0.522214	0.592469
AT5G25140	0.47396	0.633005	CYP71B13
AT5G25410	0.489091	0.570204
AT5G25415	0.483503	0.637109
AT5G25920	0.496434	0.585911
AT5G26015	0.849174	1.01552
AT5G26100	0.465519	0.582879
AT5G26146	0.73293	0.721784
AT5G26805	0.744323	0.85422
AT5G27035	1.47572	1.36261
AT5G27140	0.375954	0.502295
AT5G27530	0.555862	0.515112
AT5G27880	0.596927	0.575205
AT5G28360	1.07574	0.940639	ACS3
AT5G28410	0.432417	0.524601
AT5G33365	1.00337	0.758768
AT5G34852	0.714158	0.724056
AT5G35510	0.50026	0.718385
AT5G35945	0.781287	0.867992
AT5G36120	0.632336	0.510755	CCB3
AT5G37030	0.517621	0.580365
AT5G37476	0.462814	0.604699
AT5G38080	0.815624	0.870081
AT5G38090	0.602516	0.674594
AT5G38180	0.788492	1.22211
AT5G38230	0.551776	0.57973
AT5G38317	0.586873	0.512202	LCR58
AT5G38420	0.520322	0.692004	RBCS2B
AT5G39160	0.892555	0.757982
AT5G39170	0.653256	0.652308
AT5G39190	0.605036	0.628449	GER2
AT5G39430	0.460582	0.502142
AT5G39630	0.420084	0.510323
AT5G39635	0.766603	0.874291	MIR169C
AT5G40020	0.555593	0.517236
AT5G40330	0.547361	0.595703	MYB23
AT5G40348	0.592016	0.628191
AT5G40360	0.474351	0.513239	MYB115
AT5G40630	0.808545	0.823717
AT5G40900	0.728474	0.824756
AT5G41300	0.600373	0.651878
AT5G41430	0.722678	0.779707	ATL85
AT5G41450	0.809671	0.785033	ATL87
AT5G42170	0.983046	1.01452
AT5G42410	0.441684	0.62181	SAUR43
AT5G43065	0.68922	0.63847
AT5G43185	0.5875	0.641894
AT5G43285	0.816964	0.748168	LURE1.1
AT5G43550	0.781398	0.78202
AT5G43570	1.30198	1.01507
AT5G43580	1.412	1.1721	UPI
AT5G43650	0.657084	0.741	BHLH92
AT5G43770	0.519533	0.639584
AT5G44130	0.580547	0.562724	FLA13
AT5G44565	0.381487	0.581075
AT5G44585	0.323767	0.726413	PROSCOOP12
AT5G44980	0.626846	0.687328
AT5G45070	0.409081	0.537962	PP2-A8
AT5G45875	0.495248	0.523014	SCRL27
AT5G45960	0.557222	0.583125
AT5G46010	0.787098	0.891912
AT5G46040	0.410542	0.617274
AT5G46120	0.469008	0.641448
AT5G46200	0.672988	0.728804
AT5G46220	0.323163	0.517374	TOD1
AT5G46300	0.46488	0.508107
AT5G46540	0.668582	0.664344	ABCB7
AT5G46873	0.593363	0.635714
AT5G46874	0.653563	0.667917
AT5G46877	0.773893	0.900236
AT5G46900	0.665257	0.669542
AT5G46980	0.390769	0.50258
AT5G48000	0.53966	0.519021	CYP708A2
AT5G48040	0.484193	0.540343
AT5G48280	0.432069	0.504848
AT5G48700	0.717629	0.664584	SUMO4
AT5G48710	0.536573	0.650373	SUMO6
AT5G49520	0.347403	0.532844	WRKY48
AT5G50270	0.489014	0.645409
AT5G50801	0.843476	0.80015
AT5G51795	0.623638	0.689485
AT5G51812	0.325317	0.638451
AT5G51845	0.950089	1.06206
AT5G51860	0.494328	0.535867	AGL72
AT5G52055	0.479287	0.512191
AT5G52120	0.679096	0.72286	PP2-A14
AT5G52150	0.570802	0.503641
AT5G52260	0.514524	0.608657	MYB19
AT5G52410	0.20316	0.526026
AT5G52490	0.786249	0.723018
AT5G52605	0.768621	0.841721
AT5G52670	0.619979	0.753594
AT5G52690	0.420796	0.513557
AT5G52700	0.482053	0.519447
AT5G52720	0.575913	0.627517
AT5G52740	0.426988	0.73043
AT5G52760	0.861756	1.05479
AT5G53100	0.408852	0.521631
AT5G53200	0.572208	0.517823	TRY
AT5G53205	0.908946	1.11171
AT5G53910	0.564243	0.571162
AT5G54215	0.932406	0.806959
AT5G54220	0.998963	1.07081
AT5G54480	0.584027	0.601023
AT5G54790	0.536583	0.541548	VUP4
AT5G55170	0.520626	0.709549	SUMO3
AT5G55890	0.735639	0.705782	ATDOB17
AT5G56070	0.628193	0.504615
AT5G56110	0.835481	0.843599	MYB80
AT5G56640	0.583592	0.687543	MIOX5
AT5G57400	0.566123	0.60856
AT5G58660	0.662238	0.591233
AT5G59105	0.536184	0.613171
AT5G59490	0.491778	0.574498
AT5G60650	0.479711	0.572857
AT5G60810	0.590991	0.502427	RGF1
AT5G60970	0.454442	0.502435	TCP5
AT5G61605	0.533251	0.583895	PCP-BALPHA
AT5G61620	0.565639	0.612904
AT5G62120	0.482867	0.591976	RR23
AT5G62830	0.758147	0.629519
AT5G63085	0.710757	1.02825
AT5G63087	0.754456	0.810852
AT5G63140	0.777831	0.504816	PAP29
AT5G63230	0.956309	0.749397
AT5G63240	0.685143	0.612486
AT5G63250	0.963463	1.01699
AT5G64770	0.876695	0.885549	RGF9
AT5G64800	0.701488	0.757764	CLE21
AT5G64810	0.600059	0.57642	WRKY51
AT5G65140	0.876164	0.86359	TPPJ
AT5G66840	0.481677	0.540779

## Sheet: K27_3d_Loss
Supplementary Table 3
(H) Genes losing H3K27me3 after 3d of cold exposure
Gene	log2FCNvs3h	log2FCNvs3d	Name
AT1G02540	-0.981887	-0.915471
AT1G05880	-0.638193	-0.695706	ARI12
AT1G06980	-0.450299	-0.643408
AT1G07870	-0.58585	-0.847614
AT1G11482	-0.696839	-0.711072
AT1G12020	-0.424796	-0.635576
AT1G14890	-0.157165	-0.639396
AT1G20350	-0.778268	-0.822371	TIM17-1
AT1G20790	-0.514046	-0.62247
AT1G21250	-0.716625	-0.856323	WAK1
AT1G22150	-0.500692	-0.513289	SULTR1;3
AT1G23140	-0.803845	-0.920626	CAR8
AT1G24405	-0.630448	-0.559638
AT1G28130	-1.13571	-1.04663	GH3.17
AT1G28610	-0.445248	-0.541264
AT1G31400	-0.645087	-0.647928
AT1G31993	-0.553618	-0.749555
AT1G32010	-0.374278	-0.632188
AT1G32970	-0.484289	-0.502232
AT1G33220	-0.900969	-0.980191
AT1G35730	-0.458481	-0.534657	PUM9
AT1G53633	-0.744608	-0.785262
AT1G59970	-0.647706	-0.777493	AT5-MMP
AT1G61600	-0.632208	-0.917182
AT1G62320	-0.389951	-0.509545
AT1G63030	-0.288228	-0.799293	ddf2
AT1G63570	-0.534578	-0.602729
AT1G65210	-0.639771	-0.56883
AT1G66060	-0.677617	-0.641886
AT1G68526	-0.946863	-1.22526
AT1G68640	-0.660625	-0.575802	PAN
AT1G69470	-0.550178	-0.800916
AT1G70640	-0.948677	-0.569769
AT1G77830	-0.856862	-1.02608
AT1G78390	-0.63976	-0.634029	NCED9
AT1G80520	-0.567786	-0.564332
AT1G80660	-0.501677	-0.595961	HA9
AT2G02026	-1.40265	-1.31511
AT2G02890	-0.434197	-0.546677
AT2G23142	-0.626584	-0.732296
AT2G25130	-0.612472	-0.593969
AT2G25470	-0.622373	-0.608095	RLP21
AT2G29654	-0.969259	-0.950911
AT2G32560	-0.665546	-0.78883
AT2G32670	-0.540304	-0.517564	VAMP725
AT2G33020	-0.387414	-0.54417	RLP24
AT2G33640	-1.51375	-1.50769	PAT21
AT2G35570	-0.661931	-0.861274
AT2G37210	-0.929837	-0.874134	LOG3
AT2G39640	-0.24348	-0.532019
AT2G40030	-0.729404	-0.642249	NRPD1B
AT2G41970	-0.997999	-1.03324	MRI
AT2G42540	0.233592	-0.579474	COR15A
AT2G45450	-0.793494	-0.641751	ZPR1
AT2G47340	-0.496073	-0.533836
AT3G01530	-0.376216	-0.547354	MYB57
AT3G01940	-0.263767	-0.518925
AT3G02000	-0.846078	-1.13971	ROXY1
AT3G08860	-0.37445	-0.559105	PYD4
AT3G11580	0.000930501	-0.605347	NGAL2
AT3G14540	-0.643833	-0.611065	TPS19
AT3G18660	-0.769364	-0.803697	PGSIP1
AT3G22410	-0.462416	-0.580623
AT3G22490	-0.522743	-0.56167	ATRAB28
AT3G22700	-0.453314	-0.654478
AT3G25090	-0.708029	-0.887211
AT3G25182	-0.422941	-0.592602
AT3G28510	-1.00286	-1.03841
AT3G29032	-0.326203	-0.507203
AT3G30570	-0.447265	-0.515371
AT3G42880	-0.378674	-0.525774	PRK3
AT3G43750	-1.02875	-1.04431	RFA1
AT3G45446	-0.374709	-0.603278
AT3G45790	-0.181732	-0.547269
AT3G45960	-0.551825	-0.60517	EXLA3
AT3G48320	-0.67775	-0.802866	CYP71A21
AT3G48770	-0.591794	-0.6509
AT3G50280	-1.3618	-1.51375
AT3G50300	-0.942993	-1.13342
AT3G50970	0.214589	-2.10043	LTI30
AT3G52310	-0.657171	-0.743893	ABCG27
AT3G52600	-0.51356	-0.571958	CWINV2
AT3G59250	-0.778926	-0.856968
AT4G00200	-1.96018	-1.8648	AHL7
AT4G00380	-0.731669	-0.830219	FDM2
AT4G01490	-0.747612	-0.932538
AT4G01740	-0.832536	-0.705258
AT4G02660	-0.536139	-0.657985	BCHA2
AT4G09784	-0.847877	-0.854293
AT4G10265	-0.834217	-0.931971	WIP3
AT4G10530	-0.781973	-0.884007
AT4G10695	-0.765996	-0.843209
AT4G11550	-0.516753	-0.504695
AT4G18930	-0.5867	-0.568317
AT4G19270	-0.175848	-0.646271
AT4G21926	-0.470462	-0.514133
AT4G22415	-0.75823	-0.865769
AT4G23160	-0.566393	-0.535486	CRK8
AT4G24660	-0.337193	-0.615246	HB22
AT4G25420	-0.859214	-0.78212	GA20OX1
AT4G25950	-0.390446	-0.548051	VATG3
AT4G26320	-0.479608	-0.744767	AGP13
AT4G26830	-0.24747	-0.772147
AT4G28405	-0.959858	-0.833418
AT4G30030	-0.509749	-0.60913
AT4G32170	-0.962829	-0.956856	CYP96A2
AT4G32990	-0.476003	-0.717343
AT4G33820	-0.451806	-0.506184
AT5G03435	-0.50203	-0.655997	MCTP13
AT5G10430	-0.63527	-1.25106	AGP4
AT5G12050	-0.947783	-0.857521	BG1
AT5G17760	-0.734009	-0.878676
AT5G24655	-0.391604	-0.63778	LSU4
AT5G24920	-0.374607	-0.52664	GDU5
AT5G25010	-0.79204	-0.782383
AT5G26345	-1.28354	-1.07657
AT5G28463	-1.39786	-1.64873
AT5G43780	-1.69982	-1.38078	APS4
AT5G49500	-1.17298	-0.975346
AT5G49850	-0.507548	-0.529711
AT5G51920	-0.79387	-0.864817
AT5G52450	-0.589793	-0.61793
AT5G53240	-0.835927	-0.920644	ATDOB7
AT5G53990	-1.28969	-1.27354
AT5G54148	-0.704746	-0.716077
AT5G55330	-0.700464	-0.923214
AT5G55440	-0.259789	-0.550436	ATDOA16
AT5G55560	-0.463163	-0.548368
AT5G58820	-0.428741	-0.524325
AT5G60530	-0.325852	-0.559501
AT5G62970	-0.488272	-0.721109
AT5G67020	-0.297299	-0.557576
