# Supplementary material for: Cold stress induces rapid gene-specific changes in the levels of H3K4me3 and H3K27me3 in Arabidopsis thaliana
Source: Front Plant Sci. 2024 Apr 15;15:1390144. doi: 10.3389/fpls.2024.1390144 (PMC11056581; doi:10.3389/fpls.2024.1390144)
Supplement: Supplementary file 4 [file Table_3.xlsx]

## Sheet: ChIPseq
Supplementary Table 2
(A) Read counts in the ChIPseq experiment
Sample	Mapped and filtered reads
N_1_input	6588163
N_1_H3K4me3	16486923
N_1_H3K27me3	2517604
3h_1_input	8522820
3h_1_H3K4me3	1023263
3h_1_H3K27me3	12666656
3d_1_input	8927482
3d_1_H3K4me3	14378265
3d_1_H3K27me3	14180457
N_2_input	4137178
N_2_H3K4me3	14482683
N_2_H3K27me3	13977478
3h_2_input	3171534
3h_2_H3K4me3	13136828
3h_2_H3K27me3	11360483
3d_2_input	7112627
3d_2_H3K4me3	13242088
3d_2_H3K27me3	12715062

## Sheet: RNAseq
Supplementary Table 2
(B) Read counts in the RNAseq experiment
Sample	Mapped reads
N_1	23981082
3h_1	20879198
3d_1	21144743
N_2	20119617
3h_2	19759355
3d_2	20678356
N_3	19899329
3h_3	21031546
3d_3	22826008
