# Supplementary material for: Cold stress induces rapid gene-specific changes in the levels of H3K4me3 and H3K27me3 in Arabidopsis thaliana
Source: Front Plant Sci. 2024 Apr 15;15:1390144. doi: 10.3389/fpls.2024.1390144 (PMC11056581; doi:10.3389/fpls.2024.1390144)
Supplement: Supplementary file 5 [file Table_4.xlsx]

## Sheet: Nvs3h
Supplementary Table 4
(A) Differentially regulated genes after 3h of cold exposure
Gene	log2FoldChange	padj	Name
AT1G01060	5.33237	1.28091e-102	LHY
AT1G01180	-1.2134	0.000550621
AT1G01200	1.64858	0.00647033	RABA3
AT1G01240	-3.14865	2.28731e-17
AT1G01300	1.28654	2.98369e-07
AT1G01310	2.66582	0.0038967
AT1G01340	1.28205	0.000985121	CNGC10
AT1G01390	1.17536	0.000360551
AT1G01420	1.80107	1.16853e-09	UGT72B3
AT1G01430	-1.09486	1.84931e-07	TBL25
AT1G01448	-1.07114	0.00238497
AT1G01470	2.99494	2.99818e-60	LEA14
AT1G01500	1.07369	5.00539e-06
AT1G01520	5.52626	7.76209e-73	ASG4
AT1G01560	2.4868	0.000142656	MPK11
AT1G01580	1.23762	0.000853953	FRO2
AT1G01600	1.6983	0.000636419	CYP86A4
AT1G01680	2.75023	0.00145749	PUB54
AT1G01770	-1.29484	0.000145707
AT1G02300	-1.65541	6.31128e-09	ATCATHB1
AT1G02310	2.47067	1.46764e-05	MAN1
AT1G02390	2.20515	0.000303581	GPAT2
AT1G02400	1.30402	0.0032426	GA2OX6
AT1G02460	2.51874	4.89857e-09
AT1G02470	2.14128	0.00135776
AT1G02570	-1.55658	0.0217267
AT1G02610	-2.71565	1.32697e-08
AT1G02620	-3.89359	2.61879e-10
AT1G02640	-3.38227	9.48995e-11	BXL2
AT1G02650	-1.58063	0.00453802
AT1G02700	2.16075	0.000247934
AT1G02820	5.65839	1.36217e-38	LEA3
AT1G02830	1.16023	0.0457415
AT1G02880	1.38071	5.03174e-10	TPK1
AT1G02920	1.0231	0.0244583	GSTF7
AT1G02930	1.71934	0.000503646	GSTF6
AT1G03000	-1.09772	4.57071e-09	PEX6
AT1G03090	-1.36909	0.0228288	MCCA
AT1G03130	-2.02685	1.7626e-10	PSAD-2
AT1G03520	-1.10027	5.42384e-05
AT1G03610	-1.76011	4.38064e-08
AT1G03800	-1.27368	0.0225077	ERF10
AT1G03850	-2.12048	8.11636e-05	GRXS13
AT1G03905	1.79464	2.64107e-09	ABCI19
AT1G04107	-1.4337	1.00627e-05
AT1G04220	1.05768	0.0181836	KCS2
AT1G04247	1.45477	0.00385208
AT1G04280	-1.05093	5.83329e-08	NADKC
AT1G04310	-1.58916	5.38109e-05	ERS2
AT1G04400	-1.60731	3.46947e-19	CRY2
AT1G04520	1.69872	1.14791e-08	PDLP2
AT1G04550	1.53899	1.83558e-11	IAA12
AT1G04570	8.28087	6.18276e-91
AT1G04877	-1.13903	0.0337788
AT1G04880	1.07596	0.0153167	HMGBD15
AT1G05000	2.74555	8.36617e-08	PFA-DSP1
AT1G05020	-2.97812	2.04837e-08	AP180
AT1G05023	-1.61855	0.0184735
AT1G05065	1.65924	1.95996e-05	CLE20
AT1G05100	2.43677	1.02061e-06	MAPKKK18
AT1G05170	2.37949	1.61313e-15
AT1G05207	-2.08781	2.31101e-06
AT1G05213	2.07051	1.08347e-07
AT1G05310	-1.17645	0.00814815
AT1G05420	1.5789	0.00109124	OFP12
AT1G05467	-1.01796	0.0184592
AT1G05540	1.68112	0.00126754	ATDOA1
AT1G05675	4.05912	3.39997e-05
AT1G05690	1.39767	1.22822e-07	bt3
AT1G05700	1.14506	0.00486456
AT1G05870	2.184	1.43949e-12
AT1G06160	-2.56371	0.00438704	ORA59
AT1G06180	4.40811	3.00432e-24	MYB13
AT1G06283	-1.49786	0.00249002
AT1G06430	1.88981	2.34352e-11	ftsh8
AT1G06450	1.32626	0.00546238	CAF1G
AT1G06473	-1.53569	0.00128525
AT1G06500	-1.03403	0.000231401
AT1G06540	2.07175	0.00877749
AT1G06573	-1.88294	0.000481395
AT1G06580	-1.17357	0.010144	PPR1
AT1G06630	-1.26491	1.15044e-06
AT1G06645	-1.40657	1.37767e-06
AT1G06760	-1.16181	0.000592525	H1.1
AT1G06980	1.91453	9.69942e-08
AT1G07010	1.34481	3.30056e-06	SLP1
AT1G07050	4.68893	2.20955e-13	FITNESS
AT1G07135	2.1576	7.11396e-05
AT1G07150	3.2994	3.68381e-31	MAPKKK13
AT1G07160	2.95347	0.000252364
AT1G07180	1.69833	2.04273e-07	NDA1
AT1G07187	-3.52859	3.28332e-13
AT1G07250	1.12194	1.89319e-10	UGT71C4
AT1G07367	3.69765	0.000272627
AT1G07373	1.64171	0.0147546
AT1G07420	1.4805	9.6261e-08	SMO2-1
AT1G07430	1.99326	0.00372539	HAI2
AT1G07477	1.10583	0.0452477
AT1G07510	1.16954	4.04171e-05	ftsh10
AT1G07587	4.56416	2.12274e-11
AT1G07607	2.58189	3.04633e-12
AT1G07620	1.60622	0.00101849	ATOBGM
AT1G07720	1.08766	0.000113711	KCS3
AT1G07743	-1.53283	0.0161417
AT1G08170	1.15907	0.0453206	HTB8
AT1G08230	1.12013	9.69253e-05
AT1G08630	-1.07956	0.0241332	THA1
AT1G08650	3.52214	2.9496e-17	PPCK1
AT1G08733	5.01959	6.71785e-07
AT1G08747	-1.10632	0.0472259
AT1G08763	1.35168	0.0248685
AT1G08857	1.3418	0.0152033
AT1G08890	1.28075	0.000297996
AT1G08900	-1.68246	5.77529e-11
AT1G08980	-1.55006	6.99886e-12	AMI1
AT1G09005	1.36038	0.026285
AT1G09010	-1.48581	4.68211e-18
AT1G09070	1.8686	3.31912e-19	SRC2
AT1G09287	3.59042	3.34137e-09
AT1G09350	4.49642	2.74168e-05	GolS3
AT1G09390	-1.30849	4.3885e-05
AT1G09400	-1.57129	0.0208866
AT1G09415	-2.10443	3.92097e-09	NIMIN-3
AT1G09460	-2.22787	2.29818e-08
AT1G09575	-2.04072	2.99898e-05	MCU1
AT1G09745	1.13157	0.0470435
AT1G09750	-1.24561	2.11795e-06
AT1G09897	3.22122	1.10036e-08
AT1G09932	1.86218	0.0013395
AT1G09950	7.38778	8.51609e-28	RAS1
AT1G10090	1.57151	9.13954e-08
AT1G10155	3.19057	3.84996e-09	PP2-A10
AT1G10370	2.66181	9.14515e-07	ERD9
AT1G10410	2.28986	8.06083e-12
AT1G10530	1.09885	0.0485594
AT1G10550	-2.60391	0.000515728	XTH33
AT1G10650	1.78571	2.02642e-16
AT1G11175	-2.09907	4.31287e-09
AT1G11180	-1.05012	5.61393e-06	SCAMP2
AT1G11210	5.59035	2.4114e-47
AT1G11260	-2.77804	1.68058e-08	STP1
AT1G11290	-1.00703	0.0132335	CRR22
AT1G11360	-1.06274	3.87604e-05
AT1G11390	1.52456	1.70759e-10	ABC1K10A
AT1G11600	1.04173	0.00917544	CYP77B1
AT1G11960	1.70119	4.26641e-05	OSCA1.3
AT1G12220	-1.63108	4.67234e-07	RPS5
AT1G12240	-1.43189	2.46597e-05	ATBETAFRUCT4
AT1G12370	2.80687	1.55038e-13	PHR1
AT1G12420	2.94687	8.0354e-20	ACR8
AT1G12440	-1.2241	3.71686e-05
AT1G12450	-1.43888	3.43233e-06
AT1G12730	-1.01529	0.000177651
AT1G12780	-1.88065	4.60803e-06	UGE1
AT1G12910	-1.53517	1.94941e-10	ATAN11
AT1G12970	-1.83669	8.47469e-09	PIRL3
AT1G12990	1.2712	1.44003e-06
AT1G13020	1.05401	7.34945e-08	EIF4B2
AT1G13080	-1.34447	1.00061e-09	CYP71B2
AT1G13245	-2.51316	1.13701e-30	RTFL17
AT1G13260	1.58278	8.3169e-08	RAV1
AT1G13300	-1.94528	3.75336e-06	HRS1
AT1G13340	1.22638	0.012037	ISTL6
AT1G13390	1.85257	3.31912e-19
AT1G13448	-1.71156	0.0117839
AT1G13450	-1.32189	3.87604e-05	GT-1
AT1G13480	2.60085	0.00344128
AT1G13520	1.32942	0.017223
AT1G13540	-1.09848	0.0108924
AT1G13600	1.20185	0.00765955	bZIP58
AT1G13650	-2.07804	6.06879e-05
AT1G13700	-3.59523	2.97377e-26	PGL1
AT1G13730	1.08648	1.37534e-05
AT1G13740	1.81839	1.39478e-07	AFP2
AT1G14185	-1.37293	0.00795057
AT1G14200	-3.82433	2.21576e-22	SNIPER1
AT1G14205	-1.59588	0.000266373	U18-L8
AT1G14280	-1.5576	1.48867e-07	PKS2
AT1G14520	-1.04924	0.0196628	MIOX1
AT1G14700	-1.2859	6.61803e-05	PAP3
AT1G14820	1.19952	6.89188e-11
AT1G14890	-1.32551	0.000298288
AT1G14920	-1.50191	4.46664e-05	GAI
AT1G15040	-2.29027	0.000206999	GAT1_2.1
AT1G15100	3.31109	2.40401e-15	RHA2A
AT1G15175	-3.55411	7.82507e-08
AT1G15330	-2.93228	0.000212758
AT1G15530	-1.34268	1.58272e-05	LECRK-S.1
AT1G15550	-2.39098	4.73972e-09	GA3OX1
AT1G15670	-2.30057	4.89795e-08	KMD2
AT1G15740	-1.59431	1.30093e-07
AT1G15830	-2.02926	4.00795e-11
AT1G15950	1.68402	4.28802e-12	CCR1
AT1G16030	-1.41498	1.01348e-06	Hsp70b
AT1G16060	1.52851	0.00133779	ADAP
AT1G16170	-1.15623	3.47181e-05
AT1G16250	-1.1216	0.000102088
AT1G16310	1.06605	0.00330406
AT1G16390	-1.34061	0.000599003	OCT3
AT1G16420	3.07419	0.00039542	MC8
AT1G16500	2.09624	2.22781e-07
AT1G16515	3.34893	8.2923e-06
AT1G16730	2.55004	7.4067e-11	UP6
AT1G16850	4.76964	1.88427e-53
AT1G17050	2.61798	3.01834e-13	SPS2
AT1G17090	1.65479	0.000151578
AT1G17100	2.74826	4.10688e-14	HBP1
AT1G17380	3.09479	1.53558e-07	JAZ5
AT1G17420	1.81554	6.55675e-06	LOX3
AT1G17430	-1.08521	0.00465534
AT1G17640	-1.54245	1.22129e-05	RBGD1
AT1G17665	2.61442	1.1972e-08
AT1G17830	1.73086	4.78949e-05
AT1G17970	-1.01092	0.000111276	CTL15
AT1G18265	-2.40956	6.98543e-08
AT1G18620	-2.41962	2.53148e-21	TRM3
AT1G18660	1.34292	3.57037e-09	IAP1
AT1G18710	1.06154	0.0011652	MYB47
AT1G18745	-1.09949	0.0325878
AT1G18750	1.42456	4.94543e-08	AGL65
AT1G18850	1.33101	2.54693e-06	PCP2
AT1G18900	1.96911	1.20651e-16
AT1G19000	-2.22607	1.72939e-39
AT1G19020	1.63183	3.55722e-05	SDA1
AT1G19050	1.92124	0.000131229	ARR7
AT1G19140	1.18579	1.40746e-07	COQ9
AT1G19180	3.1991	1.52943e-29	JAZ1
AT1G19250	2.16149	0.00807475	FMO1
AT1G19370	1.93331	2.33791e-26
AT1G19396	-1.27813	0.0174487
AT1G19410	2.71625	0.00363975
AT1G19450	1.83652	1.05078e-08
AT1G19490	3.96639	3.72991e-45	BZIP62
AT1G19640	1.93101	0.0106292	JMT
AT1G19660	-1.82785	9.90194e-09	BBD2
AT1G19700	1.54957	7.2674e-12	BEL10
AT1G19770	-1.09146	7.85689e-06	PUP14
AT1G20030	2.98126	1.36302e-07
AT1G20100	1.28538	4.47933e-10
AT1G20440	2.81382	9.03485e-10	COR47
AT1G20450	4.55465	1.06172e-86	ERD10
AT1G20630	-1.36706	2.44068e-05	CAT1
AT1G20823	1.64322	0.00454966	ATATL80
AT1G21110	2.10836	0.000343083	IGMT3
AT1G21120	2.72599	2.75393e-07	IGMT2
AT1G21240	1.13498	0.0422864	WAK3
AT1G21250	1.20267	0.0259334	WAK1
AT1G21400	-1.83507	0.000552717
AT1G21460	1.67114	1.89804e-07	SWEET1
AT1G21500	-1.48392	7.27803e-06
AT1G21510	-2.17769	0.00697754
AT1G21670	1.24834	2.0309e-09
AT1G21790	1.37821	7.41945e-05
AT1G21830	-1.43464	0.000598796
AT1G21840	-1.02817	0.00618387	UREF
AT1G22070	1.41885	0.000115196	TGA3
AT1G22220	2.62085	0.00011538	AUF2
AT1G22250	1.81923	0.00212968
AT1G22330	-2.20042	1.63524e-05
AT1G22360	-1.39702	3.42509e-11	UGT85A2
AT1G22370	-2.75114	1.47814e-12	UGT85A5
AT1G22640	-2.11566	4.7565e-28	MYB3
AT1G22770	2.47392	3.1927e-18	GI
AT1G23010	2.18497	2.50235e-11	LPR1
AT1G23060	-1.41373	0.0111084	MDP40
AT1G23080	-2.31349	1.01748e-08	PIN7
AT1G23120	-1.12102	0.0198307
AT1G23140	1.73971	7.642e-05	CAR8
AT1G23205	1.49527	0.00199533
AT1G23390	-5.52659	6.05723e-44	KFB
AT1G23400	-1.58981	1.88918e-10	CAF2
AT1G23465	-1.64696	0.00350017	ATIMP1B
AT1G23480	-1.48189	2.27577e-05	CSLA03
AT1G23550	1.77896	1.30247e-06	SRO2
AT1G23870	-2.20656	1.38072e-09	TPS9
AT1G24140	2.62814	0.000803842	AT3-MMP
AT1G24147	2.60161	0.0007459
AT1G24160	-1.08941	0.000161586
AT1G24440	-1.3274	1.75594e-06
AT1G24580	5.8391	7.86795e-23
AT1G25230	-3.14518	1.78953e-14
AT1G25250	3.01968	7.24079e-08	IDD16
AT1G25275	-1.50618	6.01412e-08
AT1G25370	1.20292	0.000451786
AT1G25422	1.12581	0.0447297
AT1G25440	-1.08847	0.000222307	BBX15
AT1G25560	-1.68243	8.19463e-05	TEM1
AT1G26390	1.06874	0.0490158	ATBBE4
AT1G26560	1.90876	4.64601e-05	BGLU40
AT1G26600	1.49964	0.000898018	CLE9
AT1G26770	2.60598	1.84305e-09	EXPA10
AT1G26790	6.83958	8.55898e-14	CDF6
AT1G26800	-4.85658	8.92234e-21	MPSR1
AT1G26945	-1.62068	1.69468e-05	KDR
AT1G27200	2.08108	1.51618e-22
AT1G27210	-1.72112	6.21197e-10
AT1G27290	-2.58294	1.11984e-19
AT1G27670	-1.07395	0.0224421
AT1G27730	4.7336	5.26594e-21	STZ
AT1G27760	2.62885	5.50562e-18	SAT32
AT1G27770	1.40594	1.07298e-13	ACA1
AT1G27910	1.89052	6.53346e-08	PUB45
AT1G27930	1.60661	4.78705e-12	AGM1
AT1G27940	2.733	8.59382e-05	ABCB13
AT1G27950	1.20908	1.83536e-06	LTPG1
AT1G28050	1.62687	5.82277e-06	BBX13
AT1G28100	-1.36471	2.05564e-08
AT1G28260	-1.44409	0.0012534
AT1G28330	-3.15995	2.10453e-09	DYL1
AT1G28360	1.23308	0.0107531	ERF12
AT1G28370	1.78903	0.00375109	ERF11
AT1G28380	1.20587	1.18899e-08	NSL1
AT1G28600	2.00529	3.58105e-05
AT1G28670	-1.00782	0.000208249	ARAB-1
AT1G29170	1.62691	1.16998e-09	WAVE2
AT1G29357	-1.67596	0.00149762
AT1G29380	1.71533	2.89142e-07
AT1G29430	-2.92334	1.24481e-07	SAUR62
AT1G29440	-2.50612	0.000267797	SAUR63
AT1G29450	-3.82515	6.68847e-12	SAUR64
AT1G29460	-4.66143	8.62581e-07	SAUR65
AT1G29465	-1.91249	8.06664e-05
AT1G29500	-2.41309	9.59807e-06	SAUR66
AT1G29510	-1.63757	5.5097e-06	SAUR67
AT1G29690	1.317	2.37497e-07	CAD1
AT1G30040	1.95806	9.2626e-06	GA2OX2
AT1G30100	1.6833	0.017596	NCED5
AT1G30190	1.60882	0.0169981
AT1G30200	-1.74898	1.08187e-13
AT1G30220	-1.0975	0.0347093	INT2
AT1G30280	1.41764	0.0061963	AUXILIN-LIKE7
AT1G30360	1.18796	0.00043309	ERD4
AT1G30520	-1.90959	1.36346e-08	AAE14
AT1G30530	1.20756	0.00289567	UGT78D1
AT1G30570	-1.2884	4.78303e-05	HERK2
AT1G30620	1.52723	6.43717e-08	MUR4
AT1G30820	-2.89438	1.51653e-14	CTPS1
AT1G31290	-2.11894	4.76809e-05	AGO3
AT1G31580	1.30744	0.00522688	ECS1
AT1G31935	-1.15397	0.00760852	SORF12
AT1G32190	1.03658	0.000275816
AT1G32240	1.08523	0.000256672	KAN2
AT1G32440	1.27204	2.80894e-06	PKp3
AT1G32700	-1.73313	1.29382e-06
AT1G32860	1.94191	1.2064e-05
AT1G32870	2.39666	6.92418e-19	NAC13
AT1G32880	2.23756	0.00688656
AT1G32900	4.6285	2.57213e-38	GBSS1
AT1G32928	-2.47053	3.73246e-07
AT1G32950	1.68379	0.00176531
AT1G32960	1.30456	0.0337102	SBT3.3
AT1G33055	-3.57047	1.53752e-05	HUP32
AT1G33110	2.41965	1.75888e-14
AT1G33240	-1.47167	1.20996e-17	GTL1
AT1G33475	-2.28878	0.00187578
AT1G33615	-1.02011	0.0191317
AT1G33750	-1.20323	0.0160633	TPS22
AT1G33770	-2.282	0.00476538
AT1G33780	-1.515	9.06501e-08
AT1G33960	1.00649	0.0277058	AIG1
AT1G34050	1.79118	0.0118909
AT1G34260	1.13629	7.08729e-05	FAB1D
AT1G34780	1.00073	1.38424e-07	APRL4
AT1G35140	-1.81561	0.000247934	PHI-1
AT1G35230	1.07345	0.0427387	AGP5
AT1G35430	-1.78347	6.53747e-05
AT1G35612	-2.3287	3.6515e-07
AT1G35910	1.23154	0.00886248	TPPD
AT1G36060	-1.87888	6.29047e-05	TG
AT1G36622	2.27517	1.17977e-05
AT1G36940	-2.39321	0.00015117
AT1G43910	1.65163	2.3981e-05
AT1G44100	2.09995	1.29958e-15	AAP5
AT1G44770	-1.09853	1.45438e-05
AT1G45010	1.33958	0.000896898
AT1G45249	1.24927	9.05617e-06	ABF2
AT1G46768	2.32743	3.13515e-08	RAP2.1
AT1G47395	2.31527	0.00110673	FEP2
AT1G47400	2.33714	0.000944538	FEP3
AT1G47530	1.3372	7.88762e-10	DTX33
AT1G47710	2.27117	5.15483e-19	SERPIN1
AT1G48040	1.24506	8.60838e-06
AT1G48060	1.92364	0.00642386
AT1G48100	5.18811	6.5423e-36	PGX3
AT1G48650	1.35328	5.92456e-08
AT1G48690	-1.10557	0.0425994
AT1G48840	-1.28886	5.55208e-09
AT1G49032	-2.16121	9.46112e-11
AT1G49130	-4.10282	7.3059e-08	BBX17
AT1G49180	-2.34435	4.12045e-15
AT1G49200	-1.19081	0.0432735	ATL75
AT1G49210	-2.99606	0.000211103	ATL76
AT1G49220	1.64446	0.0186807	ATL10
AT1G49230	3.94582	2.91545e-14	ATL78
AT1G49405	2.06713	0.00128525	CASPL5C3
AT1G49450	3.83714	3.91104e-15	AIW2
AT1G49500	-2.43855	4.49236e-05
AT1G49530	-1.01768	0.030946	GGPS6
AT1G49610	-2.82473	0.00280495
AT1G49720	3.83697	3.23889e-27	ABF1
AT1G50040	-1.97133	0.0010185
AT1G50660	1.11064	8.85824e-08
AT1G51080	1.04957	0.00110974
AT1G51090	7.14478	1.00018e-33	ATHMAD1
AT1G51340	1.36475	0.00248334	MATE
AT1G51350	1.20313	9.20676e-11
AT1G51360	-1.53741	1.2023e-08	DABB1
AT1G51430	-1.60655	3.79885e-06
AT1G51440	1.82811	0.000841808	DALL2
AT1G51610	1.58004	4.9297e-06
AT1G51660	1.11384	2.51677e-05	MKK4
AT1G51680	1.6992	3.19216e-07	4CL1
AT1G51700	2.36979	1.60771e-07	DOF1
AT1G51805	1.00959	0.00686141	SIF3
AT1G51913	1.95057	0.0103885
AT1G51940	-1.03912	0.00015374	LYK3
AT1G52190	-1.8807	1.08138e-06	NPF1.2
AT1G52245	-2.6072	3.78492e-06
AT1G52770	3.29158	7.00464e-06
AT1G52855	1.91215	0.00200781
AT1G53035	3.81576	1.16106e-25
AT1G53090	1.84785	2.70961e-10	SPA4
AT1G53160	-1.34769	0.0184719	SPL4
AT1G53163	-1.92888	0.00654887
AT1G53450	-1.07572	5.91484e-07
AT1G53560	-1.15821	0.00210513
AT1G53625	2.83757	0.00012654
AT1G53680	2.47044	4.07743e-06	GSTU28
AT1G54120	-2.00866	0.00095288
AT1G54570	1.10658	0.000925136	PES1
AT1G54575	1.18286	0.00127877
AT1G54740	-3.07262	7.31315e-14
AT1G55000	-1.71877	8.32166e-14
AT1G55110	1.48196	8.9607e-14	IDD7
AT1G55210	2.52115	1.01748e-08
AT1G55310	-1.29227	2.90867e-06	SCL33
AT1G55510	-1.38094	8.02476e-06	BCDH BETA1
AT1G55690	1.10745	7.58001e-05
AT1G55775	1.47197	0.0250318
AT1G55910	1.95238	7.41022e-10	ZIP11
AT1G55915	1.08035	0.000234068	WSS1A
AT1G55960	2.24753	5.12558e-11
AT1G56150	-2.98996	5.77731e-05	SAUR71
AT1G56220	-3.51252	1.71088e-22
AT1G56300	1.05341	0.00185939	DJC53
AT1G56430	1.38068	0.01279	NAS4
AT1G56510	1.05742	0.000393083	WRR4
AT1G56650	1.90423	0.0120124	PAP1
AT1G56660	2.00079	6.50198e-10
AT1G56670	1.64639	2.10616e-05
AT1G56720	-1.70817	1.42975e-09
AT1G57980	-1.48669	4.26845e-06
AT1G57990	-1.27098	1.8247e-05	PUP18
AT1G58180	-1.88106	0.000278916	BCA6
AT1G58200	-1.2065	8.74091e-07	MSL3
AT1G58210	-1.15171	4.1983e-05	EMB1674
AT1G58235	1.02066	1.27403e-06
AT1G58280	1.26492	0.00116486
AT1G58340	1.13007	0.00354592	ZF14
AT1G58420	4.20856	3.11365e-05
AT1G58520	2.42499	1.6333e-10	RXW8
AT1G58602	1.11067	3.12041e-06	RPP7
AT1G59620	-2.10254	3.04621e-12	CW9
AT1G59730	3.44645	6.16366e-06	TH7
AT1G60140	-1.96179	1.89138e-05	TPS10
AT1G60190	5.83141	1.06687e-31	PUB19
AT1G60270	3.45121	1.35636e-18	BGLU6
AT1G60470	1.19471	0.0193956	GolS4
AT1G60505	-1.11624	3.96406e-05
AT1G60590	1.13704	0.00542617
AT1G60890	1.14572	2.94589e-06	PIP5K8
AT1G61100	-1.10133	7.13405e-06
AT1G61210	1.66805	2.08394e-10	DWA3
AT1G61340	4.01917	6.59123e-28	FBS1
AT1G61380	1.24497	9.30121e-05	SD1-29
AT1G61590	-1.50794	3.88136e-06	PBL15
AT1G61730	1.5262	1.65238e-11
AT1G61795	-2.34096	9.08232e-07
AT1G61800	7.87165	2.96848e-15	GPT2
AT1G61890	2.85375	4.83331e-09
AT1G62050	1.19481	3.7271e-09
AT1G62180	2.60452	1.17077e-06	37347
AT1G62300	1.43514	2.00814e-10	WRKY6
AT1G62420	-1.02874	0.0348643
AT1G62570	2.97412	1.82914e-12	FMO GS-OX4
AT1G62710	2.06506	2.45803e-11	BETA-VPE
AT1G62870	2.60587	3.82065e-05
AT1G63180	-1.34551	0.000862097	UGE3
AT1G63245	1.77719	0.00687227	CLE14
AT1G63580	1.42112	0.00222739
AT1G63600	-1.35727	0.0294173
AT1G63650	1.01411	0.0146698	EGL3
AT1G63800	-1.87351	5.32863e-09	UBC5
AT1G63860	1.38807	0.000189146
AT1G64000	1.36852	0.0197123	WRKY56
AT1G64080	1.11196	0.0089973	MAKR2
AT1G64140	1.36192	7.64329e-12
AT1G64200	-1.3652	2.70566e-06	VHA-E3
AT1G64380	2.24642	9.25122e-09
AT1G64390	2.2898	1.43765e-09	GH9C2
AT1G64500	1.8207	2.24237e-14
AT1G64563	-1.07566	0.0128098
AT1G64720	-1.65337	9.82116e-10	CP5
AT1G64760	2.06949	2.07039e-11	ZET
AT1G64780	3.12766	2.89313e-16	AMT1;2
AT1G64890	2.63551	5.5761e-18
AT1G64900	1.29791	2.5275e-11	CYP89A2
AT1G64950	1.83805	3.58209e-08	CYP89A5
AT1G64970	1.23212	0.00052478	G-TMT
AT1G65060	2.81623	1.20099e-10	4CL3
AT1G65390	1.18907	0.0181858	PP2-A5
AT1G65481	2.49961	0.00164153
AT1G65490	2.73536	1.42624e-05	STMP5
AT1G65500	1.45481	0.00631537	STMP6
AT1G65590	-1.04913	1.72547e-08	HEXO3
AT1G65690	1.06564	0.0188793	NHL6
AT1G65860	1.84234	0.000362468	FMO GS-OX1
AT1G65870	2.54617	1.28371e-05
AT1G66070	1.26326	5.81708e-07
AT1G66150	-1.06796	9.06501e-08	TMK1
AT1G66230	-3.44614	7.69408e-09	MYB20
AT1G66390	4.41515	0.00045817	MYB90
AT1G66500	1.79221	1.6952e-08
AT1G66540	1.63407	2.69314e-05
AT1G66700	2.22027	0.00665567	PXMT1
AT1G66840	1.76611	7.52517e-10	PMI2
AT1G66880	1.27884	8.84566e-06
AT1G66890	-1.92838	4.57504e-12
AT1G66900	-1.09188	7.99238e-09
AT1G67000	1.13813	0.048137
AT1G67030	1.27113	8.03776e-07	ZFP6
AT1G67265	-4.02006	5.87114e-05	RTFL21
AT1G67360	2.8764	2.2006e-10	LDAP1
AT1G67470	1.74184	2.64791e-05	ZRK12
AT1G67590	-1.52415	1.27473e-08
AT1G67850	1.73704	1.79977e-09
AT1G67900	-1.73157	1.74356e-05
AT1G67910	-2.51368	1.66181e-06
AT1G67970	2.77665	1.23688e-17	HSFA8
AT1G68050	7.27571	1.51978e-76	FKF1
AT1G68190	-4.43484	1.57531e-49	BBX27
AT1G68390	1.32478	0.0247684
AT1G68470	1.70008	1.49196e-06
AT1G68490	1.67962	1.25826e-12
AT1G68500	4.87373	4.13103e-34
AT1G68550	1.56399	6.0225e-17	CRF10
AT1G68570	1.13678	9.41019e-05	NPF3.1
AT1G68690	1.03419	0.00119364	PERK9
AT1G68840	-2.92071	3.17611e-19	RAV2
AT1G68850	1.38458	0.0141073
AT1G69252	1.10935	8.54331e-06
AT1G69260	1.12083	0.00142507	AFP1
AT1G69295	1.27289	3.5955e-13	PDCB4
AT1G69310	1.74043	1.5733e-09	WRKY57
AT1G69370	-1.41524	3.48493e-07	CM3
AT1G69480	3.25779	5.05814e-14
AT1G69490	-1.49501	0.00525664	NAP
AT1G69570	1.09793	0.0138181	CDF5
AT1G69610	1.42086	6.08988e-05
AT1G69640	1.13677	6.21697e-08	SBH1
AT1G69730	1.26188	5.73959e-05
AT1G69760	1.32734	1.68349e-05
AT1G69870	4.40017	1.43622e-27	NPF2.13
AT1G69890	1.16255	0.00153729	DUF569
AT1G69920	1.29693	0.0343891	GSTU12
AT1G70000	1.4317	2.01456e-08	MYBD
AT1G70080	1.37292	0.027257	TPS6
AT1G70100	-1.47442	4.23297e-06
AT1G70170	1.18367	0.0227664	MMP
AT1G70290	-4.19933	9.09654e-18	TPS8
AT1G70420	3.99685	2.06257e-26
AT1G70518	-1.43931	0.000338695
AT1G70520	-1.46536	1.01348e-06
AT1G70610	1.18674	1.13843e-05	ABCB26
AT1G70640	9.91199	6.33143e-14
AT1G70700	2.63137	1.55239e-15	TIFY7
AT1G70800	2.13403	2.07065e-05	EHB1
AT1G70820	-1.80773	2.55903e-12
AT1G70880	-1.14939	0.010706
AT1G70985	2.17217	3.09019e-06
AT1G71000	3.8873	1.36e-10
AT1G71020	-1.13085	0.000169765	PUB10
AT1G71030	-1.88817	9.75476e-05	MYBL2
AT1G71040	1.39907	3.15017e-09	LPR2
AT1G71180	-1.12587	6.24675e-05
AT1G71360	1.8285	4.66587e-13	SUN4
AT1G71710	1.07627	0.000235491
AT1G71870	1.18385	0.00110974	BIGE1A
AT1G71970	-3.38543	9.25759e-28
AT1G72150	-2.05055	4.57071e-09	PATL1
AT1G72160	-1.00998	6.63367e-07	PATL3
AT1G72200	-1.03849	0.00563915	ATL11
AT1G72210	1.34173	0.000259958	BHLH096
AT1G72275	-1.77348	0.000302801
AT1G72430	-1.06876	0.00976541	SAUR78
AT1G72450	1.14853	8.54687e-06	JAZ6
AT1G72490	2.3175	3.32835e-05	DRO1
AT1G72520	3.45693	1.74221e-15	LOX4
AT1G72630	-1.17658	6.86168e-06	ELF4-L2
AT1G72645	-3.37968	2.23449e-23
AT1G72750	1.19866	3.79885e-06	TIM23-2
AT1G72770	1.40742	9.61681e-12	HAB1
AT1G72800	1.65403	0.00323132
AT1G72820	-2.44318	1.88741e-13
AT1G72940	1.66555	1.55521e-09
AT1G73010	4.61222	5.14371e-09	PS2
AT1G73390	2.65665	5.57466e-31
AT1G73480	1.59318	7.56849e-08	MAGL4
AT1G73510	18.2226	2.52802e-09
AT1G73630	1.74768	8.30866e-08
AT1G73650	1.51384	4.50424e-07
AT1G73655	-1.05368	1.55207e-07
AT1G73750	-2.22518	1.96792e-14
AT1G73805	2.57169	1.2414e-05	SARD1
AT1G73810	3.30305	5.21062e-15
AT1G73830	-4.26065	1.19284e-40	BEE3
AT1G73870	1.53357	2.93245e-06	BBX16
AT1G73910	-1.01239	0.0284346	ARP4A
AT1G74100	1.13477	0.000219914	SOT16
AT1G74290	1.49989	0.00782012
AT1G74360	1.2733	0.00116501	NILR1
AT1G74370	-1.50503	5.49579e-07
AT1G74450	1.37125	1.30362e-09	ROH1D
AT1G74460	1.03764	0.0327462
AT1G74600	-1.02107	0.00471711	OTP87
AT1G74670	-3.35527	2.9202e-34	GASA6
AT1G74750	1.66887	8.5636e-09
AT1G74870	1.4705	0.00617459
AT1G74930	-3.07265	2.18657e-06	ORA47
AT1G75000	1.36005	0.000227454	ELO3
AT1G75040	3.00567	2.59472e-15	PR5
AT1G75170	2.27712	4.24785e-16
AT1G75360	-1.13253	0.00566777
AT1G75380	-4.0948	7.78667e-29	BBD1
AT1G75460	-1.90717	2.41677e-24
AT1G75490	-4.53689	8.71891e-09
AT1G75710	1.09464	0.000971902
AT1G75810	1.92221	1.90266e-16
AT1G75860	2.77272	2.04859e-31
AT1G75960	-2.77177	5.21555e-07
AT1G76100	-1.33734	0.000111031	PETE1
AT1G76130	1.98494	4.72196e-10	AMY2
AT1G76190	1.14883	0.0151955	SAUR56
AT1G76220	-1.93743	0.00901584
AT1G76360	1.32837	4.30581e-06	PBL31
AT1G76410	-2.72216	3.98054e-07	ATL8
AT1G76420	2.10586	0.00382579	CUC3
AT1G76560	-1.66703	4.35836e-08	CP12-3
AT1G76570	1.91384	9.05238e-21	LHCB7
AT1G76580	1.32153	1.29356e-08
AT1G76590	3.21301	6.2588e-41	PLATZ2
AT1G76620	2.29003	7.04299e-07	PDE339
AT1G76650	2.26905	9.36201e-10	CML38
AT1G76870	-1.03809	0.0335937
AT1G76890	-1.07487	5.03762e-06	GT2
AT1G76980	1.34333	4.03521e-07
AT1G77120	3.65155	1.7658e-27	ADH1
AT1G77200	1.00419	0.0142111
AT1G77210	-3.52281	4.82117e-17	STP14
AT1G77280	1.69234	7.14726e-08
AT1G77450	1.05414	0.00259577	NAC032
AT1G77680	1.43175	2.96921e-14	RRP44B
AT1G77740	1.11194	4.51242e-05	PIP5K2
AT1G78020	1.61262	1.80603e-05	FLZ6
AT1G78070	3.3687	6.99689e-24
AT1G78100	1.82559	6.96854e-11	AUF1
AT1G78210	1.36742	7.18471e-06
AT1G78230	1.19573	0.000413581
AT1G78390	1.43902	0.0217685	NCED9
AT1G78410	1.32473	0.0289726
AT1G78440	5.21195	1.00061e-21	ATGA2OX1
AT1G78510	3.22992	4.09835e-30	SPS1
AT1G78570	1.84875	2.34769e-10	RHM1
AT1G78600	2.23904	1.32165e-13	LZF1
AT1G78610	1.47629	4.60504e-09	MSL6
AT1G78830	-1.98922	8.47165e-13
AT1G78860	1.28581	0.017252	GAL2
AT1G78890	-1.82158	4.77879e-12
AT1G79110	1.1579	0.00331147	BRG2
AT1G79270	2.88805	2.03787e-21	ECT8
AT1G79360	-1.27697	0.0126422	OCT2
AT1G79520	1.51054	9.45634e-08
AT1G79529	-1.43665	0.014044
AT1G79660	1.31058	0.00013782
AT1G79670	-1.35883	4.01062e-09	RFO1
AT1G79680	1.1376	0.0377594	WAKL10
AT1G79700	-3.14634	3.83458e-08	WRI4
AT1G80110	1.51019	2.23355e-08	PP2-B11
AT1G80120	3.37673	1.69825e-14
AT1G80130	3.31112	1.77233e-24
AT1G80160	-1.23229	0.0396953	GLYI7
AT1G80180	-2.1825	9.03485e-10	MASS1
AT1G80300	2.03406	1.31695e-14	NTT1
AT1G80340	2.34368	7.54347e-06	GA3OX2
AT1G80420	-1.42122	0.000109299	ATXRCC1
AT1G80440	-4.70529	1.44525e-08	KMD1
AT1G80510	-1.14409	8.53335e-06
AT1G80570	-1.74704	1.68765e-05
AT1G80630	-2.83857	9.50512e-13
AT1G80650	-3.17607	2.25241e-24	RTL1
AT1G80750	1.20489	1.63945e-06	RPL7A
AT1G80920	-5.11472	3.83315e-20	J8
AT1G80960	-1.21676	0.00292272
AT1TE45135	26.6156	4.13928e-16
AT1TE59005	7.07581	2.97858e-06
AT1TE63790	2.41317	0.00555059
AT1TE71770	1.65361	0.00748124
AT1TE71825	2.83104	0.000629323
AT1TE71830	2.25664	0.000394294
AT1TE85165	2.23851	0.00677028
AT2G00870	-1.71334	0.00467584
AT2G01150	1.65915	0.000695065	RHA2B
AT2G01260	1.1049	1.01611e-05
AT2G01290	1.71496	4.14338e-05	RPI2
AT2G01340	-3.0139	2.49677e-11	At17.1
AT2G01420	-1.40543	7.84778e-08	PIN4
AT2G01760	-1.20191	6.08958e-05	RR14
AT2G01850	-1.11001	0.000501414	EXGT-A3
AT2G01870	-1.02605	0.00363975
AT2G01918	-1.07757	0.00238497	PQL3
AT2G01930	-1.15049	6.57214e-05	BPC1
AT2G02000	3.03873	0.0016715	GAD3
AT2G02010	3.21426	2.59121e-10	GAD4
AT2G02060	1.36422	2.1848e-05
AT2G02061	1.49179	0.00745652
AT2G02070	1.19116	1.02061e-06	IDD5
AT2G02100	1.41075	5.95509e-11	LCR69
AT2G02710	-2.28752	3.73255e-12	PLPB
AT2G02850	1.54415	2.41063e-05	ARPN
AT2G03090	1.58643	0.00112382	EXPA15
AT2G03310	-2.01599	7.82612e-12
AT2G03750	-3.02119	5.99418e-15
AT2G04070	1.4204	0.0243678
AT2G04495	2.96828	0.00213671
AT2G04690	-2.06169	7.2688e-11
AT2G05075	-1.61647	7.52844e-07
AT2G05160	-2.0515	0.00185397
AT2G05940	1.20217	0.000878825	RIPK
AT2G06002	-2.64208	0.00126413
AT2G07042	-1.02788	0.0276602
AT2G08025	1.57542	0.0206206
AT2G08120	1.0974	0.0454457
AT2G08435	1.11452	0.0198189
AT2G08955	1.91184	0.012013
AT2G14060	1.01813	0.0435163
AT2G14080	-1.73042	7.49564e-18
AT2G14100	-1.18185	0.00254516	CYP705A13
AT2G14560	1.5117	0.0231955	LURP1
AT2G15020	1.88822	5.32863e-09
AT2G15080	-2.97051	4.73282e-11	RLP19
AT2G15310	1.47535	2.62207e-06	ARFB1A
AT2G15320	1.67982	9.69822e-21
AT2G15880	-2.61355	1.61544e-06	LRX10
AT2G15890	-2.93647	6.80216e-20	MEE14
AT2G15960	-2.40776	6.0633e-07
AT2G15970	1.82247	6.76198e-11	COR413-PM1
AT2G16005	-2.1634	0.000731546	ROSY1
AT2G16050	-1.62616	1.37534e-05
AT2G16365	2.27244	1.44369e-15	PCH1
AT2G16390	-1.17478	2.42729e-05	DRD1
AT2G16430	1.56539	3.59687e-06	PAP10
AT2G16500	1.7103	4.1695e-08	ADC1
AT2G16700	1.71289	1.49015e-23	ADF5
AT2G16890	4.25421	4.45798e-30
AT2G16900	1.22661	2.21072e-08
AT2G17220	1.27872	2.72961e-09	KIN3
AT2G17270	1.57034	1.5508e-07	PHT3;3
AT2G17280	1.61737	7.52306e-10
AT2G17300	2.20562	8.34388e-07
AT2G17450	-1.58999	8.34749e-10	RHA3A
AT2G17660	1.93211	0.0116344
AT2G17730	1.30027	3.80413e-07	NIP2
AT2G17780	-1.25615	6.98267e-05	MCA2
AT2G17787	-2.39641	1.51249e-11
AT2G17840	3.67243	2.56535e-72	ERD7
AT2G17880	-4.96696	1.44778e-06	DJC24
AT2G18010	-2.5849	0.00434593	SAUR10
AT2G18240	1.05862	1.28327e-05
AT2G18290	-1.02249	0.000163935	APC10
AT2G18300	-1.91595	1.5216e-10	HBI1
AT2G18500	1.22104	0.000415645	OFP7
AT2G18560	-3.09124	3.53813e-34
AT2G18620	2.49907	0.000359229	GGPPS2
AT2G18670	-1.24709	2.82329e-05	ATL56
AT2G18690	1.68553	0.00029292
AT2G18700	-3.74035	1.0345e-16	TPS11
AT2G18915	1.14507	2.95766e-09	LKP2
AT2G19190	1.26818	0.00661031	FRK1
AT2G19640	1.02637	0.000469151	ASHR2
AT2G19660	-1.8388	0.00391542
AT2G19800	-3.42507	7.84637e-13	MIOX2
AT2G19810	-1.1738	0.00677406	OZF1
AT2G19980	1.6508	0.00984953
AT2G20142	2.35778	6.27273e-11
AT2G20180	-2.08967	4.1206e-09	PIL5
AT2G20250	-1.84213	8.46559e-05
AT2G20520	-1.83556	0.011723	FLA6
AT2G20560	1.21389	0.00199641	DNAJ
AT2G20570	1.24452	5.49121e-06	GPRI1
AT2G20650	-1.24923	1.01159e-05	FLY2
AT2G20670	-5.82442	9.23077e-25
AT2G20835	-2.69104	0.000340802
AT2G20880	4.17944	1.80291e-09	ERF53
AT2G21100	1.06727	0.0346356
AT2G21130	1.81549	2.13358e-05
AT2G21180	1.15028	1.93078e-05
AT2G21210	-3.68048	1.61573e-18	SAUR6
AT2G21320	4.35626	7.40489e-15	BBX18
AT2G21450	-9.42096	0.000432552	CHR34
AT2G21560	1.12319	8.11636e-05
AT2G21710	-1.13289	4.64601e-05	EMB2219
AT2G21900	1.68305	0.0099996	WRKY59
AT2G21970	1.28578	5.36342e-06	37500
AT2G22080	2.02283	1.9377e-25
AT2G22190	2.39571	1.22909e-07	TPPE
AT2G22500	3.92506	8.40738e-19	UCP5
AT2G22590	5.53452	5.48397e-21
AT2G22690	-1.77315	2.53595e-06
AT2G22730	-1.13269	0.00267
AT2G22830	-1.4512	1.03282e-06	SQE2
AT2G22840	1.95212	8.22944e-18	GRF1
AT2G22890	-1.93173	4.26747e-06
AT2G22980	-2.14082	3.6838e-13	SCPL13
AT2G22990	-1.01185	1.5331e-06	SNG1
AT2G23120	2.55137	6.9039e-42
AT2G23290	-1.96449	2.92421e-06	MYB70
AT2G23340	2.93197	3.37791e-13	DEAR3
AT2G23420	1.69699	7.12446e-13	NAPRT2
AT2G23690	-3.8364	7.1333e-07
AT2G23770	-1.85501	0.000229833	LYK4
AT2G23810	1.09493	1.58814e-06	TET8
AT2G23910	4.52606	2.641e-17
AT2G23950	1.25142	0.000367054	CLERK
AT2G24050	1.12593	0.000298432	eIFiso4G2
AT2G24190	1.07737	0.000414865	SDR2
AT2G24250	-1.1364	0.00372034	ATFDA14
AT2G24550	-2.3584	2.81302e-07
AT2G24560	2.25442	0.00675757
AT2G24600	1.06888	0.00754861
AT2G25090	-1.41497	0.00208904	CIPK16
AT2G25200	-6.49024	3.46895e-22
AT2G25297	2.86966	0.00273466
AT2G25350	-1.02386	0.000228657
AT2G25460	1.09446	0.00127989
AT2G25510	1.1673	0.00457194
AT2G25530	2.74252	5.39123e-11
AT2G25590	-1.0485	0.00378199
AT2G25620	2.38974	3.20765e-13	DBP1
AT2G25625	2.09763	0.000103014	CV
AT2G25680	1.07125	0.00208345	MOT1
AT2G25690	1.71992	6.5025e-07
AT2G25735	-1.39442	0.00501587
AT2G25780	-1.61637	0.00405359
AT2G25790	-1.26324	9.20365e-05	SKM1
AT2G25900	-5.52024	1.32555e-34	ATCTH
AT2G26030	-1.29761	0.000120021
AT2G26110	-1.38495	1.30746e-07
AT2G26170	1.2714	1.30212e-05	CYP711A1
AT2G26215	-2.78749	2.32712e-08
AT2G26290	1.66283	6.35375e-05	ARSK1
AT2G26480	2.31341	4.87191e-05	UGT76D1
AT2G26560	1.95493	2.15148e-08	PLA2A
AT2G26660	1.07546	0.00185847	SPX2
AT2G26690	1.16631	2.49409e-07	NPF6.2
AT2G26710	-2.34864	4.94734e-09	BAS1
AT2G26870	-1.67152	1.50244e-06	NPC2
AT2G26980	-1.01415	0.00325327	CIPK3
AT2G27050	-1.81199	8.56904e-13	EIL1
AT2G27060	-1.41571	5.31645e-08
AT2G27080	1.16181	8.5625e-05	NHL13
AT2G27260	1.01769	6.15371e-08
AT2G27310	-1.01244	0.00418257
AT2G27360	1.35858	1.31944e-10
AT2G27420	3.59172	4.16537e-05
AT2G27830	-1.02867	0.00392338
AT2G28040	-1.31652	0.0336104
AT2G28050	-1.01355	0.00941848	RPF7
AT2G28120	-3.17324	1.38025e-16	OTU1
AT2G28305	2.48207	6.54145e-20	LOG1
AT2G28320	1.13623	8.23062e-09
AT2G28500	3.30266	4.4926e-05	LBD11
AT2G28510	1.32808	3.51387e-05	DOF2.1
AT2G28550	2.25157	9.01274e-15	RAP2.7
AT2G28630	-2.50034	5.16768e-17	KCS12
AT2G28900	2.20963	1.01032e-11	OEP16-1
AT2G29090	1.47813	4.42561e-05	CYP707A2
AT2G29110	1.14698	0.0472514	GLR2.8
AT2G29120	1.41209	1.79537e-05	GLR2.7
AT2G29220	1.01572	0.0477537	LECRK-III.1
AT2G29290	-3.41319	2.57914e-46	DEG14
AT2G29300	-4.64428	7.11877e-17
AT2G29310	-2.83224	7.59328e-11
AT2G29440	2.21898	1.79466e-08	GSTU6
AT2G29450	1.58737	2.73232e-08	GSTU5
AT2G29460	1.32024	0.00348621	GSTU4
AT2G29680	-1.34186	0.00525011	CDC6
AT2G29970	1.28774	4.10826e-07	SMXL7
AT2G29980	1.33905	2.66591e-06	FAD3
AT2G30040	2.37727	2.02176e-27	MAPKKK14
AT2G30100	1.62946	1.42448e-08
AT2G30230	-1.68679	3.79616e-05
AT2G30420	-1.38517	0.00328565	ETC2
AT2G30490	1.43428	4.79828e-08	C4H
AT2G30600	-2.27029	1.32771e-07
AT2G30766	2.9875	0.000941126	FEP1
AT2G30790	-1.48246	0.00323801	PSBP-2
AT2G30900	1.96832	0.0109677	TBL43
AT2G31070	1.412	2.61667e-06	tcp10
AT2G31081	-1.12819	0.0490603	CLE4
AT2G31100	1.06204	0.048188
AT2G31150	-1.83073	3.31581e-19
AT2G31230	1.56577	0.00426283	ERF15
AT2G31360	2.72912	2.26146e-17	ADS2
AT2G31380	3.00974	1.74488e-24	STH
AT2G31800	-1.03084	0.00020992
AT2G31940	1.06662	0.0121976
AT2G32020	2.12388	4.12668e-06
AT2G32050	1.25317	0.0335612
AT2G32090	-1.18299	8.58114e-08	GLXI-LIKE;9
AT2G32100	-4.21093	4.20264e-19	OFP16
AT2G32150	-3.10281	8.63194e-12
AT2G32179	-2.48762	0.0021331
AT2G32200	1.94268	0.00461918	ATHCYSTM5
AT2G32210	2.88209	2.67033e-06	ATHCYSTM6
AT2G32240	1.03095	0.00201864	PICC
AT2G32295	1.0906	9.06501e-08
AT2G32510	1.08198	0.0296159	MAPKKK17
AT2G32560	-1.48925	3.06482e-05
AT2G32800	-1.08448	1.97348e-05	LECRK-S.2
AT2G32930	1.61158	6.52168e-07	ZFN2
AT2G32950	1.13268	7.53611e-08	COP1
AT2G32960	1.52296	0.000523236	PFA-DSP2
AT2G32970	-1.3916	1.3386e-06
AT2G32990	1.68896	0.00156846	GH9B8
AT2G33170	-1.06244	3.36566e-07
AT2G33480	-1.2143	0.000168162	NAC041
AT2G33530	2.10908	4.41786e-08	scpl46
AT2G33585	1.17252	5.42384e-05
AT2G33750	-1.00689	0.0428995	PUP2
AT2G33830	-2.11284	2.98585e-06	DRM2
AT2G33835	-1.29595	1.72646e-06	FES1
AT2G34070	2.09792	6.10389e-10	TBL37
AT2G34080	1.05597	0.028785
AT2G34430	-1.27196	1.84406e-05	LHB1B1
AT2G34500	-1.66041	0.00245432	CYP710A1
AT2G34570	1.0072	0.000199287	MEE21
AT2G34620	-3.8167	1.47272e-22	MTERF10
AT2G34650	2.68066	4.92472e-13	PID
AT2G34660	1.38216	1.54938e-07	ABCC2
AT2G34720	1.96227	9.98742e-26	NF-YA4
AT2G34850	1.21008	0.00692574	MEE25
AT2G34960	1.03722	0.0108802	CAT5
AT2G35075	-1.28586	0.00178114
AT2G35170	-1.2303	0.000435116
AT2G35290	2.3046	9.20641e-05	SAUR79
AT2G35470	-1.43539	1.45872e-08
AT2G35612	2.79767	0.00199335
AT2G35650	1.36434	9.74681e-07	CSLA07
AT2G35660	1.00201	0.00139787	CTF2A
AT2G35700	3.03841	9.52249e-12	ERF38
AT2G35710	2.20934	6.68158e-06	PGSIP7
AT2G35760	1.44468	2.16027e-07	CASPL2B2
AT2G35770	2.07327	0.000228789	scpl28
AT2G35860	1.00352	0.00628496	FLA16
AT2G35940	1.7669	2.06346e-20	BLH1
AT2G35960	1.75658	2.45833e-05	NHL12
AT2G36050	-3.91671	1.90675e-31	OFP15
AT2G36220	2.52599	7.67475e-32
AT2G36295	1.62749	0.00502848
AT2G36305	-1.16833	6.56813e-05	FACE2
AT2G36470	1.31163	6.4837e-05
AT2G36590	2.93046	2.99665e-09	ProT3
AT2G36610	1.17308	0.032963	HB22
AT2G36630	2.85576	1.49886e-20
AT2G36695	2.83065	0.00297061
AT2G36750	4.47144	2.58576e-16	UGT73C1
AT2G36800	1.70349	8.852e-06	DOGT1
AT2G36870	2.08544	8.34388e-07	XTH32
AT2G36880	1.60171	5.05902e-06	MAT3
AT2G36900	-1.4396	4.54884e-05	MEMB11
AT2G36950	-1.3516	1.38725e-06	ATHMP20
AT2G36970	2.67189	2.11272e-09
AT2G37025	-1.15347	0.0103331	TRFL8
AT2G37030	-4.60232	4.10111e-05	SAUR46
AT2G37040	2.64553	1.58659e-12	pal1
AT2G37430	1.21038	0.0170323	ZAT11
AT2G37480	-1.44537	4.43088e-12
AT2G37580	3.36342	6.23358e-14	ATL33
AT2G37678	-1.58185	3.07044e-06	FHY1
AT2G37710	2.25261	2.74364e-09	LECRK-IV.1
AT2G37770	2.62928	5.73959e-05	ChlAKR
AT2G37920	-1.3481	4.6297e-09	emb1513
AT2G37950	-2.04114	1.93387e-05
AT2G37970	2.6726	2.64665e-23	SOUL-1
AT2G38090	1.0402	0.00814815
AT2G38210	2.76954	5.6866e-23	PDX1L4
AT2G38230	1.85913	1.79283e-14	PDX1.1
AT2G38465	2.45834	2.55903e-12
AT2G38470	2.21792	7.2658e-07	WRKY33
AT2G38640	1.09687	0.000124752
AT2G38820	-2.842	7.42628e-13
AT2G38830	-1.35643	0.00040328
AT2G38860	1.08585	0.00752152	YLS5
AT2G38940	2.24206	7.73534e-06	PHT1;4
AT2G39200	1.25014	2.06871e-05	MLO12
AT2G39400	-2.43777	1.10635e-13	MAGL6
AT2G39450	1.37541	2.86965e-13	MTP11
AT2G39570	-2.33849	2.36893e-07	ACR9
AT2G39650	1.99155	2.31564e-08
AT2G39710	2.12487	3.01012e-09
AT2G40000	-2.40833	3.92651e-06	HSPRO2
AT2G40080	5.95108	7.85868e-40	ELF4
AT2G40100	1.27882	0.00180535	LHCB4.3
AT2G40130	3.51978	6.0512e-13	SMXL8
AT2G40140	2.22294	2.7868e-20	CZF1
AT2G40270	1.19795	1.36346e-08
AT2G40330	1.12629	0.0100019	PYL6
AT2G40340	3.284	9.79422e-12	DREB2C
AT2G40420	-1.30181	0.00067324
AT2G40460	1.39891	0.000397515
AT2G40475	1.57538	8.17264e-05	ASG8
AT2G40610	-4.91298	3.29347e-39	EXPA8
AT2G40740	1.24145	0.0390588	WRKY55
AT2G40815	-1.04147	0.0024604
AT2G40900	1.97354	9.81219e-12	UMAMIT11
AT2G40925	1.27309	0.0330268
AT2G41000	1.36876	1.61606e-06
AT2G41040	2.35839	4.30237e-11
AT2G41050	1.16237	0.000383205
AT2G41090	1.55769	3.36544e-06	CML10
AT2G41140	1.22107	1.39814e-10	CRK1
AT2G41260	1.0569	0.0257625	M17
AT2G41290	1.35064	0.000562891	SSL2
AT2G41380	1.02436	0.0129246
AT2G41410	1.41681	4.26183e-09
AT2G41430	-1.85594	1.20412e-14	ERD15
AT2G41480	1.14036	0.00766872	PRX25
AT2G41550	-1.06064	0.00220597
AT2G41560	-1.35262	1.20412e-14	ACA4
AT2G41660	1.9615	2.95242e-13	MIZ1
AT2G41870	-1.53269	8.53335e-06	REM4.2
AT2G42040	-1.02501	0.0059476
AT2G42150	3.5775	7.07128e-12
AT2G42170	-2.3161	3.171e-06
AT2G42200	1.91109	7.32446e-06	SPL9
AT2G42290	-1.16769	2.67042e-05
AT2G42320	-1.91208	2.71858e-19
AT2G42330	-1.33007	0.000116532	TMK4
AT2G42365	-1.09715	0.00863545
AT2G42530	3.17171	0.000295595	COR15B
AT2G42540	2.43283	0.00134534	COR15A
AT2G42850	-1.38937	0.0222255	CYP718
AT2G42870	-3.12793	6.94624e-06	PAR1
AT2G42900	-1.66507	4.07119e-05
AT2G42920	-1.34278	1.13843e-05
AT2G42955	-2.2731	0.00683738
AT2G42960	-1.04017	0.00112749
AT2G43010	-2.50467	1.72577e-12	PIF4
AT2G43110	1.07016	0.000393765
AT2G43120	1.09403	0.0081111	PRN2
AT2G43290	1.44643	0.000206528	MSS3
AT2G43330	-1.39667	1.20637e-05	INT1
AT2G43375	-1.35433	0.00239403
AT2G43440	2.85279	0.000115001
AT2G43500	1.56437	6.33155e-09	NLP8
AT2G43620	1.34392	0.00266167
AT2G43670	1.27543	0.0167689
AT2G43820	-1.71373	1.62716e-06	UGT74F2
AT2G44080	-2.58333	1.15071e-07	ARL
AT2G44230	-1.10444	0.00750352
AT2G44290	1.01531	0.000480663	LTPG13
AT2G44300	2.01438	1.22548e-06	LTPG14
AT2G44578	1.77492	0.00840994	ATL89
AT2G44670	2.32146	8.92853e-12
AT2G44735	-2.21113	0.000203436
AT2G44740	-3.22364	5.15455e-08	CYCP4;1
AT2G44800	1.18336	0.0413848
AT2G44940	3.47577	8.98945e-16	ERF34
AT2G45080	3.19765	1.95583e-14	cycp3;1
AT2G45170	-2.45334	6.38097e-14	ATG8E
AT2G45450	-1.34016	3.23693e-05	ZPR1
AT2G45760	4.38915	2.75543e-05	BAP2
AT2G46170	1.19389	5.44874e-05	RTNLB5
AT2G46220	-1.53598	2.00945e-10
AT2G46250	-1.00899	0.00124934
AT2G46270	1.45177	9.90579e-05	GBF3
AT2G46330	-2.48788	2.31784e-12	AGP16
AT2G46340	1.29705	1.36955e-08	SPA1
AT2G46400	3.37497	5.98614e-11	WRKY46
AT2G46410	1.29914	0.000278327	CPC
AT2G46420	2.75425	5.10018e-20
AT2G46430	1.83686	1.21184e-06	CNGC3
AT2G46440	2.2039	5.89606e-12	CNGC11
AT2G46450	1.75786	1.20221e-06	CNGC12
AT2G46490	-1.83955	5.07852e-12
AT2G46550	-1.84417	5.39017e-13
AT2G46620	1.36029	0.000298075
AT2G46670	1.38205	0.0131938
AT2G46790	2.73876	2.00213e-41	PRR9
AT2G46830	4.28595	6.18276e-91	CCA1
AT2G46940	2.30145	1.01348e-06
AT2G47370	1.58109	5.84753e-07
AT2G47460	4.71257	4.73084e-17	MYB12
AT2G47490	1.95143	1.56958e-18	NDT1
AT2G47520	1.18807	0.0435247	ERF71
AT2G47700	-1.62755	5.19375e-08	RFI2
AT2G47800	1.1482	0.000190869	ABCC4
AT2G47890	1.79627	2.03381e-07	BBX11
AT2G47990	1.51948	6.5322e-06	SWA1
AT2G48090	1.027	0.0184696
AT2TE06390	1.62472	0.0190709
AT2TE36460	1.63859	0.0186684
AT2TE41835	1.15736	0.0440639
AT2TE55970	1.38883	0.00591288
AT2TE71050	-1.1269	0.0420816
AT2TE73080	2.0924	0.000197173
AT3G00330	2.90518	0.00243984
AT3G00840	-1.74496	0.0142485
AT3G01140	1.9293	0.0116791	MYB106
AT3G01210	1.67504	3.8718e-09	BPL6
AT3G01370	-1.10503	4.8544e-13	CFM2
AT3G01375	2.2044	0.00298093
AT3G01405	-1.30183	0.0252523
AT3G01450	-1.29439	0.0022344
AT3G01690	-1.26989	7.9617e-12
AT3G01770	-1.38259	1.2166e-05	BET10
AT3G01795	3.48186	4.16897e-18
AT3G01820	2.58621	2.67091e-21
AT3G01830	5.28336	3.41922e-09
AT3G01860	1.03989	0.000242986
AT3G02170	-2.68632	1.51248e-10	LNG2
AT3G02180	-1.28431	5.77529e-11	SP1L3
AT3G02205	3.27274	0.00121796
AT3G02340	-1.30772	6.59045e-05
AT3G02370	-1.15872	0.00131959
AT3G02380	1.02196	0.00240662	COL2
AT3G02550	-2.09703	9.75476e-05	LBD41
AT3G02700	-1.59445	1.95304e-09
AT3G02750	1.17266	2.18426e-10
AT3G02830	1.08864	0.000150281	ZFN1
AT3G03150	-1.20455	0.00012917
AT3G03180	-1.08662	0.00210358	GOT1
AT3G03260	1.69077	0.0150023	HDG8
AT3G03265	-4.68062	5.2765e-14
AT3G03440	3.58755	9.62174e-34
AT3G03450	1.8068	1.33692e-05	RGL2
AT3G03530	1.36126	0.0214849	NPC4
AT3G03535	5.94056	1.40925e-06
AT3G03780	2.49038	1.98072e-06	MS2
AT3G03820	-3.35405	1.71348e-05	SAUR29
AT3G03830	-2.86537	0.00297157	SAUR28
AT3G03840	-1.35694	0.0126289	SAUR27
AT3G03850	-2.38235	0.00230267	SAUR26
AT3G03870	-1.06715	0.00350335
AT3G04010	2.46518	4.74716e-15
AT3G04030	1.69091	0.000546948	MYR2
AT3G04060	1.80385	4.96209e-05	NAC046
AT3G04110	1.14436	9.53719e-06	GLR1.1
AT3G04140	3.30564	4.6788e-19
AT3G04160	-1.02939	0.00159692
AT3G04420	1.22818	0.00838431	NAC048
AT3G04640	1.45882	1.12877e-08
AT3G04730	-1.07412	5.17013e-05	IAA16
AT3G04755	-1.28001	0.0128867
AT3G05140	-2.03622	0.000247934	RBK2
AT3G05160	-1.42009	0.000203867
AT3G05220	1.30261	1.68111e-08	ATHMP23
AT3G05327	2.001	6.4045e-05
AT3G05500	1.22097	1.41983e-11	LDAP3
AT3G05650	1.09939	0.017223	RLP32
AT3G05660	2.24344	0.000176499	RLP33
AT3G05800	4.82647	1.8582e-23	AIF1
AT3G05830	1.01682	0.00018779	ATNEAP1
AT3G05880	1.04664	0.000683905	RCI2A
AT3G05980	2.4516	3.81884e-07
AT3G06035	1.10096	0.00147115
AT3G06070	-1.34319	0.01279
AT3G06080	-1.60354	2.18657e-06	TBL10
AT3G06140	-1.54707	2.1882e-07	LUL4
AT3G06330	-1.03746	7.23386e-07
AT3G06380	-1.32514	1.02061e-06	TLP9
AT3G06410	2.25267	3.05096e-22
AT3G06455	-1.78608	3.17959e-05
AT3G06470	-1.01309	9.29146e-07	ELO2
AT3G06520	1.58405	0.00149893
AT3G06780	-1.0081	0.00749735
AT3G06850	-2.31177	6.56936e-06	BCE2
AT3G06890	1.69884	0.000238686
AT3G06950	-1.00151	0.000155731
AT3G07010	-1.63022	4.47749e-11
AT3G07195	1.33306	3.32113e-05
AT3G07205	2.66469	7.01129e-11
AT3G07310	-2.16588	4.88189e-14
AT3G07350	-3.5997	5.00957e-13
AT3G07360	1.4679	3.1475e-11	PUB9
AT3G07390	1.63581	4.51111e-07	AIR12
AT3G07500	-1.04932	0.00780552	FRF2
AT3G07540	-1.08552	6.60022e-06	FH10
AT3G07600	1.1199	0.0485897
AT3G07650	4.38009	2.50492e-43	COL9
AT3G07720	1.23401	1.67774e-05
AT3G08040	1.78311	1.01085e-08	FRD3
AT3G08375	1.1824	0.0199353
AT3G08505	1.79111	4.44984e-09
AT3G08640	1.0252	1.33303e-11	RER3
AT3G08720	1.49618	3.42783e-07	S6K2
AT3G08730	1.58174	6.87452e-16	PK1
AT3G08890	-1.01446	0.000640713
AT3G08940	-1.30566	5.38141e-07	LHCB4.2
AT3G09030	-1.02529	6.7535e-05	EAP3
AT3G09032	3.10292	5.97243e-14
AT3G09050	-1.14897	9.10551e-05
AT3G09085	-1.14749	0.00439576
AT3G09350	1.65592	4.77946e-09	Fes1A
AT3G09415	1.0109	0.0368299
AT3G09440	2.14887	1.27269e-06
AT3G09450	3.359	5.23891e-16
AT3G09520	3.12058	2.24145e-10	EXO70H4
AT3G09580	-1.72283	4.4728e-05
AT3G09590	3.99063	1.39941e-05
AT3G09595	3.00544	0.000938927
AT3G09600	3.44201	9.17614e-33	RVE8
AT3G09650	2.23647	5.55374e-12	HCF152
AT3G09780	-1.47885	0.000128931	CCR1
AT3G09790	-1.24075	0.0391137	UBQ8
AT3G10020	-3.81412	1.07028e-22	HUP26
AT3G10040	-2.4396	4.05864e-05	HRA1
AT3G10405	-1.44935	4.15466e-09
AT3G10740	-1.45372	7.60122e-07	ASD1
AT3G10815	1.47607	0.00025731	BTL03
AT3G10930	1.26103	0.0130389	IDL7
AT3G11020	3.37736	4.84721e-10	DREB2B
AT3G11100	-1.37124	4.67297e-06	VFP3
AT3G11110	-1.36564	1.83916e-05	ATL66
AT3G11210	1.33993	1.14616e-07
AT3G11410	1.4451	0.00206414	PP2CA
AT3G11420	1.12407	6.73114e-08
AT3G11430	1.33588	0.0136623	GPAT5
AT3G11580	2.29979	3.03653e-13	NGAL2
AT3G11650	-1.27129	8.1079e-05	NHL2
AT3G11670	1.34157	3.02178e-07	DGD1
AT3G11690	-1.55945	2.20928e-05
AT3G12150	-2.42636	6.65502e-14
AT3G12320	2.21919	6.98382e-30	LNK3
AT3G12700	1.06982	0.0062541	NANA
AT3G12900	1.30306	0.0173113	S8H
AT3G13062	-1.48664	9.00843e-07
AT3G13080	1.09925	4.62817e-05	ABCC3
AT3G13090	1.05327	0.00980376	ABCC6
AT3G13100	1.47895	0.000388156	ABCC7
AT3G13277	-1.36953	0.00311473
AT3G13310	1.50532	6.42869e-07	DJC66
AT3G13432	1.44685	0.016012
AT3G13750	-2.57857	1.41269e-08	BGAL1
AT3G13960	1.45315	1.45616e-05	GRF5
AT3G13980	-1.22645	0.000281601	BG4
AT3G14200	2.54882	1.62055e-14
AT3G14440	3.29771	1.40601e-08	NCED3
AT3G14570	1.08262	0.00156537	GSL04
AT3G14690	1.71648	7.82158e-10	CYP72A15
AT3G14720	2.33622	6.31569e-13	MPK19
AT3G14770	1.66173	6.38097e-14	SWEET2
AT3G14810	1.17321	1.0046e-06	MSL5
AT3G15030	1.45765	8.57733e-07	TCP4
AT3G15070	-1.30834	1.25279e-05	TEAR2
AT3G15090	1.32764	1.14549e-09
AT3G15210	2.67152	7.32253e-17	ERF4
AT3G15354	1.41465	7.79977e-07	SPA3
AT3G15358	-1.37791	0.000723165
AT3G15400	-1.03336	0.00261702	ATA20
AT3G15450	-4.57955	2.98991e-16
AT3G15460	1.3388	0.0018326	ATBRX1-1
AT3G15470	1.15669	9.98583e-07
AT3G15630	-2.9691	3.30831e-11
AT3G15650	3.26817	2.07375e-12
AT3G15740	2.01654	0.00872589
AT3G15750	2.98568	2.07086e-15
AT3G15770	-2.35518	3.90447e-09
AT3G15810	1.19748	2.29786e-08
AT3G15990	2.03479	8.2923e-06	SULTR3;4
AT3G16120	-2.43766	1.85858e-05
AT3G16175	1.80419	0.000998573
AT3G16250	-1.05569	0.00470694	PnsB3
AT3G16350	1.18097	0.000458778	NID1
AT3G16530	1.50542	0.00496148
AT3G16560	1.49703	1.70465e-05
AT3G16750	-1.42448	5.85187e-06
AT3G16860	1.59308	1.67774e-05	COBL8
AT3G17100	-1.93624	5.26316e-13	AIF3
AT3G17130	3.93712	1.80167e-23
AT3G17470	-1.10867	3.4943e-09	CRSH
AT3G17580	-1.44445	0.0108387
AT3G17609	4.42225	2.45836e-22	HYH
AT3G17611	1.6838	9.34439e-08	RBL14
AT3G17690	1.56493	0.0114308	CNGC19
AT3G17790	3.52721	1.75869e-05	PAP17
AT3G17800	3.39037	2.46638e-20
AT3G17980	2.93267	0.00175312	C2
AT3G18010	2.75107	7.13367e-13	WOX1
AT3G18320	-2.65584	6.35592e-12
AT3G18610	1.21948	0.00151426	NUC-L2
AT3G18773	-4.31202	6.60167e-07	ATL77
AT3G18800	-1.48574	1.4286e-05
AT3G18830	1.72319	4.40807e-10	PMT5
AT3G18880	-1.25734	0.0142222
AT3G18950	1.53047	0.00103503	AIW1
AT3G18960	-1.46427	0.00163278	REM7
AT3G18980	-2.2451	4.51644e-32	ETP1
AT3G19020	1.16556	0.000130165	LRX8
AT3G19150	1.62091	6.16366e-06	KRP6
AT3G19450	2.16391	9.76534e-11	ATCAD4
AT3G19850	-3.26251	6.71106e-20
AT3G19860	-1.36016	7.74767e-07	bHLH121
AT3G19970	2.09307	1.76595e-06
AT3G20362	1.41773	0.0160464
AT3G20395	-4.90625	3.02712e-17	ATL92
AT3G20440	-1.38754	0.00029568	EMB2729
AT3G20520	2.22028	0.00738273	SVL3
AT3G20600	1.77605	1.74686e-06	NDR1
AT3G20660	-1.0001	0.00927871	OCT4
AT3G20680	-2.46296	2.3915e-14
AT3G21080	1.62543	0.00113026
AT3G21150	5.73513	2.19474e-30	BBX32
AT3G21220	1.02871	1.93797e-06	MKK5
AT3G21230	1.18873	0.00261614	4CL5
AT3G21330	-1.99829	0.00493649
AT3G21390	1.39688	3.17618e-09
AT3G21560	5.10448	1.43709e-34	UGT84A2
AT3G21660	2.88101	4.64899e-06
AT3G21670	2.07523	4.79399e-09	NPF6.4
AT3G21690	2.33827	6.29594e-14
AT3G21700	1.39575	0.000220256	SGP2
AT3G21750	2.54521	1.59718e-12	UGT71B1
AT3G21890	3.97717	0.000151923	BBX31
AT3G22370	1.83741	1.74642e-09	AOX1A
AT3G22380	1.18069	2.02348e-12	TIC
AT3G22550	1.75533	0.000920763
AT3G22600	1.42981	0.000791419	LTPG5
AT3G22660	1.05434	0.000212276	EBP2
AT3G22810	1.07	0.000749192	FL2
AT3G22830	10.1253	6.15083e-15	HSFA6B
AT3G22840	6.20319	8.42436e-15	ELIP1
AT3G22930	1.94553	3.13346e-06	CML11
AT3G23000	2.81126	1.07747e-37	CIPK7
AT3G23080	-2.9092	4.2106e-40
AT3G23110	1.36895	4.38432e-05	RLP37
AT3G23150	-1.02521	0.00608233	ETR2
AT3G23170	4.34826	1.56003e-31	PRP
AT3G23200	1.12186	0.000411943	CASPL5B3
AT3G23210	2.24914	8.3398e-16	bHLH34
AT3G23250	2.55926	0.000766599	MYB15
AT3G23410	1.55547	8.31663e-06	FAO3
AT3G23480	-2.34707	0.000103543
AT3G23530	1.19199	2.02784e-08
AT3G23630	1.66965	0.00807184	IPT7
AT3G23635	-1.7597	0.0138392	RTFL13
AT3G23730	-1.38162	0.00373714	XTH16
AT3G23810	3.37925	1.75107e-14	SAHH2
AT3G23820	1.70298	3.22271e-09	GAE6
AT3G23880	-4.92495	3.68405e-28
AT3G24000	-1.12004	0.00050425
AT3G24080	1.05996	1.44731e-05
AT3G24170	1.69976	6.93967e-08	GR1
AT3G24190	2.29174	1.87681e-14
AT3G24310	2.44645	2.47271e-08	MYB305
AT3G24420	1.21031	0.000209414	DLK2
AT3G24460	2.94869	2.3153e-10
AT3G24503	1.12785	5.92456e-08	ALDH2C4
AT3G24840	1.58828	8.53842e-09
AT3G25030	1.40601	2.7116e-08
AT3G25250	2.29334	0.000182726	AGC2-1
AT3G25610	1.03381	0.00185637	ALA10
AT3G25670	-1.41558	0.00154012
AT3G25700	1.36862	9.73042e-06
AT3G25730	2.01074	1.14315e-14	EDF3
AT3G25770	-1.01388	0.00855005	AOC2
AT3G25780	1.77281	2.40329e-05	AOC3
AT3G25870	1.89954	1.41983e-11
AT3G25882	1.16931	0.0294059	NIMIN-2
AT3G26135	-1.19855	0.0248338
AT3G26180	-2.05934	2.85984e-12	CYP71B20
AT3G26220	-1.00197	0.0230604	CYP71B3
AT3G26240	-2.89491	3.48885e-26
AT3G26280	-1.44931	1.32773e-11	CYP71B4
AT3G26510	-4.0751	3.21868e-15
AT3G26590	1.22012	9.94921e-05
AT3G26740	-2.43048	7.50146e-15	CCL
AT3G26760	-1.42964	0.0016239
AT3G26830	2.1236	0.00290959	PAD3
AT3G26890	-1.60563	3.8563e-09
AT3G26932	-1.13604	0.000154719	DRB3
AT3G27025	1.62579	0.00959969	LAZY6
AT3G27170	2.87372	2.45119e-14	CLC-B
AT3G27200	1.06844	0.0258109
AT3G27210	1.33989	2.29828e-05
AT3G27270	1.27898	0.000420708
AT3G27350	1.55442	8.01304e-21
AT3G27570	1.18784	1.59035e-06
AT3G27630	1.35764	0.030614	SMR7
AT3G27690	-1.00329	0.00148833	LHCB2.3
AT3G27880	2.09995	2.9496e-17
AT3G27950	1.84824	0.00781432
AT3G28170	1.11244	0.0198189
AT3G28340	1.61806	0.000186313	GATL10
AT3G28580	2.47009	0.000577449
AT3G29000	4.08008	1.00276e-08
AT3G29030	2.21036	6.40821e-06	EXPA5
AT3G29035	-1.12611	0.000238163	NAC3
AT3G29200	2.01937	1.71157e-16	CM1
AT3G29240	-2.10439	1.27361e-08
AT3G29320	-2.58461	5.43876e-15	PHS1
AT3G29590	1.33769	0.00870703	AT5MAT
AT3G30460	5.07711	1.15388e-12
AT3G30775	-2.51186	4.5446e-08	ERD5
AT3G32930	-1.09323	3.78492e-06
AT3G42800	-1.70033	0.00148554
AT3G43110	1.2466	0.0247634
AT3G44100	1.08827	1.63323e-07
AT3G44450	3.74973	5.5336e-06	BIC2
AT3G44720	1.75577	3.37045e-07	ADT4
AT3G44735	1.16755	0.00114595	PSK3
AT3G44798	-1.39039	8.7912e-05
AT3G45210	1.15694	0.00102171
AT3G45420	-1.61232	0.00210732	LECRK-I.4
AT3G45430	-1.12138	0.00562661	LECRK-I.5
AT3G45638	1.27458	0.0103361
AT3G45640	1.14124	0.000281964	MPK3
AT3G45660	2.91445	7.80872e-05
AT3G45680	-1.20369	0.0262273	NPF2.3
AT3G45780	-1.25192	8.46724e-09	PHOT1
AT3G45960	2.75163	7.29224e-06	EXLA3
AT3G46080	1.60482	0.00092614
AT3G46370	-1.96253	1.5658e-05
AT3G46600	-1.50671	8.06824e-17
AT3G46620	1.21549	2.5809e-05	RDUF1
AT3G46640	3.35731	2.50492e-43	PCL1
AT3G46930	1.49735	7.36606e-08	RAF43
AT3G46970	1.15138	0.00162502	PHS2
AT3G47080	1.62378	6.68362e-17
AT3G47160	-1.98111	7.84389e-13
AT3G47340	-2.07519	0.00508743	ASN1
AT3G47420	4.7139	4.60613e-53	G3Pp1
AT3G47430	1.41124	0.000196978	PEX11B
AT3G47500	1.13917	9.21606e-07	CDF3
AT3G47560	-2.22717	1.4411e-22
AT3G47640	1.38687	2.75543e-05	PYE
AT3G47820	2.83121	2.53518e-10	PUB39
AT3G47960	1.22994	0.00246346	NPF2.10
AT3G48240	1.28591	0.00756833
AT3G48330	-1.26449	5.78216e-05	PIMT1
AT3G48350	-1.02111	0.0144332	CEP3
AT3G48360	-3.91273	1.00512e-11	bt2
AT3G48390	-4.32197	1.03194e-20	MRF4
AT3G48460	1.73224	1.58694e-05	SFAR4
AT3G48510	2.5268	6.89419e-05
AT3G48520	2.55156	7.41945e-05	CYP94B3
AT3G48590	-1.45078	1.08069e-09	NF-YC1
AT3G48600	-1.48224	0.0010777	SWIB1
AT3G48690	1.17364	1.39988e-11	CXE12
AT3G48700	2.75417	6.10448e-18	CXE13
AT3G48800	1.133	1.90263e-06
AT3G49160	-1.25536	0.00350834
AT3G49210	1.35561	0.00154757	WSD6
AT3G49220	2.17588	2.57925e-20	PME34
AT3G49570	1.3048	0.021165	LSU3
AT3G49590	-1.23872	4.32154e-06	ATG13
AT3G49670	1.41525	1.46127e-07	BAM2
AT3G49790	-3.2372	1.15332e-18
AT3G49845	1.04555	0.0325314	WIH3
AT3G49940	-1.85832	1.46084e-07	LBD38
AT3G50140	-1.463	0.0112329
AT3G50260	2.23622	4.63702e-07	CEJ1
AT3G50270	-1.91051	4.06729e-06
AT3G50400	1.03194	0.0368299
AT3G50440	-1.36939	0.00217429	MES10
AT3G50470	-2.22026	0.00531823	HR3
AT3G50750	-1.38835	1.7769e-09	BEH1
AT3G50760	3.34942	2.1e-12	GATL2
AT3G50880	-1.22061	6.47263e-05
AT3G50910	1.54645	2.89298e-12
AT3G50930	2.2862	1.6854e-06	BCS1
AT3G50970	3.26666	2.90833e-20	LTI30
AT3G51110	-1.19232	1.18375e-06
AT3G51240	1.64646	0.0174752	F3H
AT3G51325	-2.70202	0.000340802
AT3G51380	1.37468	0.00376653	IQD20
AT3G51660	2.07473	9.13039e-06
AT3G51710	-1.18292	0.0168027
AT3G51750	1.41489	0.000892646
AT3G51895	2.43733	8.26321e-09	SULTR3;1
AT3G51910	-1.65117	2.56038e-06	HSFA7A
AT3G51920	1.61396	1.19083e-10	CAM9
AT3G52060	-2.16658	6.73471e-11	GNTL
AT3G52190	1.27451	6.95668e-06	PHF1
AT3G52370	1.79997	2.02025e-05	FLA15
AT3G52400	1.79378	1.6365e-05	SYP122
AT3G52430	1.83798	8.32336e-08	PAD4
AT3G52450	1.17062	9.20344e-06	PUB22
AT3G52470	2.29598	5.17188e-17
AT3G52480	-1.0612	0.0159775
AT3G52740	3.82678	6.41681e-26	BIC1
AT3G52800	1.92812	2.20773e-16
AT3G52840	-1.42972	1.8923e-09	BGAL2
AT3G52870	2.38022	4.34691e-15
AT3G52910	1.823	1.55333e-13	GRF4
AT3G52920	1.0945	0.000161371
AT3G52950	1.6101	4.37189e-08
AT3G53000	1.35114	1.15491e-11	PP2-A15
AT3G53170	-1.56098	2.4488e-08
AT3G53250	-6.77673	1.65197e-06	SAUR57
AT3G53260	2.62475	9.73732e-19	PAL2
AT3G53650	-1.47586	0.000231811	HTB6
AT3G53800	-4.38834	1.23159e-50	Fes1B
AT3G53860	-1.01486	0.00379857
AT3G53950	-3.0705	1.53671e-22
AT3G54000	1.61197	1.04039e-05
AT3G54150	2.14711	0.000163189	EFD
AT3G54220	1.19594	1.73045e-11	SCR
AT3G54260	-1.00818	0.00562475	TBL36
AT3G54390	1.08098	0.0127007
AT3G54400	1.17855	0.00318718
AT3G54460	-1.41831	5.61586e-12
AT3G54500	1.60367	1.01514e-09	LNK2
AT3G54510	1.27115	0.0105123
AT3G54880	-1.95374	1.24608e-08
AT3G54910	-1.17319	4.91321e-06
AT3G54950	1.6557	2.44134e-12	pPLAIIIbeta
AT3G54990	3.30526	1.04862e-29	SMZ
AT3G55110	1.26061	0.00267	ABCG18
AT3G55120	2.55474	3.30186e-11	TT5
AT3G55240	-1.79252	0.00323281
AT3G55340	1.11438	5.99352e-05	PHIP1
AT3G55450	1.08698	4.75192e-06	PBL1
AT3G55580	4.24613	3.57766e-21	TCF1
AT3G55610	1.12118	0.000463549	P5CS2
AT3G55640	1.15864	1.77971e-09
AT3G55690	1.30228	0.000291948
AT3G55760	1.27755	0.000367771	LESV
AT3G55880	1.34927	0.000153831	SUE4
AT3G55970	-1.23395	0.0176185	JRG21
AT3G55980	1.20778	0.000964929	SZF1
AT3G56000	-1.62177	0.000950717	CSLA14
AT3G56260	3.50712	1.95551e-17
AT3G56290	3.8687	1.39952e-17
AT3G56300	1.44159	1.58804e-05
AT3G56370	1.06627	0.00201893	IRK
AT3G56470	-2.47944	0.000154719
AT3G56710	1.19087	0.0203142	SIB1
AT3G56790	1.46624	0.0232419
AT3G56980	-1.06486	0.0089314	BHLH39
AT3G57010	1.11255	0.00674213
AT3G57020	2.02045	4.39009e-10
AT3G57157	2.2724	4.01136e-05	SORF5
AT3G57520	-1.04222	0.0117426	SIP2
AT3G57530	1.62339	2.21108e-10	CPK32
AT3G57540	1.52099	0.000104132	REM4.1
AT3G57630	1.19908	0.000132676	EXAD
AT3G57790	-1.06459	0.000954092
AT3G57830	1.16195	0.00663049
AT3G57950	1.65953	0.0164579
AT3G58070	3.11297	0.000262777	GIS
AT3G58120	-3.21416	8.27469e-15	BZIP61
AT3G58270	1.30546	0.00966802
AT3G58620	-1.01488	0.00351992	TTL4
AT3G59110	-1.595	1.27792e-13
AT3G59400	1.50975	0.0101431	GUN4
AT3G59900	-2.5279	9.83424e-07	ARGOS
AT3G60040	-1.93412	0.000124311
AT3G60140	-1.94453	0.000158579	DIN2
AT3G60160	1.57779	0.000417721	ABCC9
AT3G60220	-1.67663	1.10868e-05	ATL4
AT3G60290	-1.51485	0.000435227
AT3G60390	-1.33578	9.07346e-10	HAT3
AT3G60490	-2.45849	0.000280199	ERF35
AT3G60520	2.54578	7.57232e-40
AT3G60530	-1.39353	2.21222e-05	GATA4
AT3G61060	-1.6299	9.23542e-07	PP2-A13
AT3G61190	2.78194	7.49564e-18	BAP1
AT3G61198	-1.24858	0.00849081
AT3G61210	-1.43676	0.000212276
AT3G61220	1.75515	5.33713e-07	SDR1
AT3G61350	-1.03026	0.000898018	SKIP4
AT3G61460	-1.94628	2.50261e-12	BRH1
AT3G61560	1.73005	2.97385e-15	RTNLB6
AT3G61590	1.02125	0.000351942	HWS
AT3G61750	1.78162	9.52132e-10
AT3G61898	-3.04274	1.56418e-06
AT3G62010	-1.02508	9.13292e-06
AT3G62070	-1.38172	0.000578351
AT3G62210	1.42118	0.00879798	EDA32
AT3G62260	2.23958	1.3583e-25	PP2C49
AT3G62270	1.11929	0.000770607	BOR2
AT3G62550	-3.74186	1.88741e-13
AT3G62610	2.70869	0.000937802	MYB11
AT3G62690	2.0689	2.84878e-09	ATL5
AT3G62750	-2.10702	2.92233e-24	BGLU8
AT3G62930	-1.01042	0.0323866	GRXS6
AT3G62950	-5.646	3.88642e-21	GRXC11
AT3G63010	1.7108	2.35963e-05	GID1B
AT3G63060	4.72751	1.65082e-21	EDL3
AT3G63088	-1.13042	0.0486395	RTFL14
AT3G63200	1.2282	1.1328e-07	PLP9
AT3G63210	-1.2406	1.34636e-05	MARD1
AT3G63220	1.27867	5.24214e-08
AT3G63530	1.5222	3.57365e-13	BB
AT3TE43635	1.55994	0.0107696
AT3TE91080	2.32235	0.00251389
AT3TE91745	1.20911	0.0350623
AT4G00050	2.36314	1.32125e-15	UNE10
AT4G00080	1.95053	0.00061172	UNE11
AT4G00150	1.04136	4.89958e-05	HAM3
AT4G00750	-1.1435	1.68696e-07
AT4G00900	1.29551	5.98051e-06	ECA2
AT4G00950	-1.90654	2.42162e-07	MEE47
AT4G00955	1.18964	0.000877765
AT4G00970	1.04466	0.00528995	CRK41
AT4G01026	-1.71642	1.11577e-07	PYL7
AT4G01030	-1.03445	0.00217891
AT4G01070	1.05676	0.000373807	GT72B1
AT4G01080	2.62053	1.20846e-06	TBL26
AT4G01250	-1.40039	0.00102777	WRKY22
AT4G01330	-3.35887	8.34011e-16
AT4G01360	1.55129	0.0115916	BPS3
AT4G01460	-2.23561	5.84029e-08
AT4G01540	1.66131	1.75102e-07	NTM1
AT4G01630	1.67037	0.00626243	EXPA17
AT4G01660	1.51546	5.90065e-07	ABC1
AT4G01670	1.54624	1.40601e-08
AT4G01840	-1.74218	9.53781e-10	KCO5
AT4G01985	1.26007	0.00830228
AT4G02200	1.41969	1.88082e-07
AT4G02210	-1.32884	2.25718e-05
AT4G02400	1.05106	3.13346e-06
AT4G02440	-1.7086	2.41911e-12	EID1
AT4G02540	-1.90441	7.05888e-08
AT4G02630	1.22178	2.20928e-05
AT4G02710	1.1802	0.000270036	NET1C
AT4G02810	1.57072	0.00749596	FAF1
AT4G02890	1.16936	1.03984e-11	UBQ14
AT4G02940	1.36682	8.21354e-08	ALKBH10B
AT4G03030	-1.39631	1.37527e-05
AT4G03125	5.0856	7.11232e-12
AT4G03190	-1.23677	6.63586e-07	GRH1
AT4G03380	-1.23275	0.0378538
AT4G03400	2.07302	1.15451e-10	DFL2
AT4G03420	1.14603	4.68475e-08
AT4G03510	-2.48861	5.14095e-17	RMA1
AT4G03595	1.86011	0.00647086
AT4G03960	1.24944	0.00415707	PFA-DSP4
AT4G04025	3.89404	0.000606685
AT4G04630	-3.06443	5.77895e-09
AT4G04845	-1.11459	0.0421555
AT4G05010	1.55368	6.0574e-07	FBS3
AT4G05020	1.71844	1.61814e-05	NDB2
AT4G05050	2.19628	1.53928e-38	UBQ11
AT4G05410	1.20784	4.22144e-05	YAO
AT4G05631	-1.31753	0.000818572
AT4G06120	-1.4228	0.00022912
AT4G06746	3.15527	5.73708e-17	RAP2.9
AT4G06790	1.49419	0.0244061
AT4G06880	1.3318	0.0016366
AT4G07385	3.1804	0.000842666
AT4G07395	5.60019	2.56061e-06
AT4G07400	-1.24243	0.000720324	VFB3
AT4G08295	1.48235	0.0212245
AT4G08780	1.13747	0.0259786
AT4G08920	-1.44579	7.28294e-14	CRY1
AT4G08925	1.91631	0.00711155
AT4G08950	-1.53212	1.7927e-05	EXO
AT4G09030	2.16375	0.00346509	AGP10
AT4G09215	1.73438	0.0109838
AT4G09375	-1.08452	0.0257714
AT4G09460	-1.11338	0.000396979	MYB6
AT4G09500	2.64876	8.82921e-08
AT4G09750	2.19259	2.21178e-12
AT4G09820	1.7241	0.00493649	TT8
AT4G09970	1.5603	6.33793e-06
AT4G10040	2.33779	6.40982e-10	CYTC-2
AT4G10060	-1.02528	4.79146e-06	GCD3
AT4G10080	-1.25864	1.1661e-11
AT4G10380	1.0785	7.23755e-06	NIP5;1
AT4G10390	2.13697	0.000514251
AT4G10925	-1.73248	1.238e-05
AT4G10960	1.34367	1.63135e-05	UGE5
AT4G11050	1.10046	0.040443	GH9C3
AT4G11140	1.98898	4.38381e-05	CRF1
AT4G11280	1.62694	0.000126573	ACS6
AT4G11350	1.67556	3.53617e-06
AT4G11590	7.02592	9.23889e-08
AT4G11600	2.06434	1.0719e-11	GPX6
AT4G11890	1.96252	0.00306536	ARCK1
AT4G12000	3.8845	2.1527e-46
AT4G12005	1.37199	0.0189072
AT4G12130	1.83431	2.02764e-07	COG0354
AT4G12290	1.25923	0.000117774	CUAO
AT4G12320	1.7552	8.52078e-05	CYP706A6
AT4G12420	-1.1928	0.000457549	SKU5
AT4G12470	2.29902	1.52904e-27	AZI1
AT4G12480	2.01175	1.58371e-13	EARLI1
AT4G12500	1.46347	0.00617459
AT4G12690	-4.01232	3.53516e-15
AT4G12720	1.2494	1.47438e-13	NUDT7
AT4G12900	-2.30136	0.000151923
AT4G13310	-1.12133	0.0259386	CYP71A20
AT4G13345	1.19296	0.000933238	MEE55
AT4G13410	1.78524	0.0013295	ATCSLA15
AT4G13495	-1.03672	9.43904e-08
AT4G13575	-1.62007	2.96624e-15
AT4G13800	1.39947	0.00238238	ENOR3L3
AT4G13830	-2.81993	5.49182e-13	J20
AT4G13930	2.21638	6.33089e-13	SHM4
AT4G13940	1.19468	5.8257e-15	HOG1
AT4G13990	1.02527	0.00583247
AT4G14104	1.37358	0.0290361
AT4G14130	-1.43552	0.0270191	XTH15
AT4G14220	1.55111	1.31695e-14	RHF1A
AT4G14240	1.06193	3.46948e-06
AT4G14270	-3.54936	1.53947e-30
AT4G14365	2.50544	3.4619e-08	XBAT34
AT4G14368	2.2598	0.00188586
AT4G14370	1.46093	0.00159516
AT4G14400	1.99079	8.41362e-06	ACD6
AT4G14465	1.10667	0.000523514	AHL20
AT4G14480	-1.39829	4.72858e-06	BLUS1
AT4G14500	-1.25751	1.92939e-07
AT4G14540	-2.1367	1.09939e-21	NF-YB3
AT4G14580	1.54291	4.80925e-05	CIPK4
AT4G14630	1.443	0.0267705	GLP9
AT4G14690	6.26613	1.24424e-13	ELIP2
AT4G14870	-1.41279	1.00387e-09	SECE1
AT4G15130	1.71276	5.00957e-13	CCT2
AT4G15248	4.81083	9.62503e-19	BBX30
AT4G15350	2.03622	0.00476629	CYP705A2
AT4G15370	1.67672	0.0163122	BARS1
AT4G15430	1.8108	1.01111e-12
AT4G15440	2.87461	6.09277e-09	HPL1
AT4G15480	6.55539	2.45565e-23	UGT84A1
AT4G15490	2.70025	1.90266e-16	UGT84A3
AT4G15630	1.33249	0.00210358	CASPL1E1
AT4G15810	1.95314	2.60969e-14
AT4G15990	-1.73516	9.13965e-05
AT4G16000	-3.69411	9.46323e-12
AT4G16008	-1.6811	3.54696e-05
AT4G16140	2.07614	9.81219e-12
AT4G16146	1.31536	7.77444e-05
AT4G16370	1.95903	1.36243e-07	OPT3
AT4G16490	1.95762	9.25588e-23
AT4G16520	-1.87698	1.93672e-09	ATG8F
AT4G16563	1.42811	1.66924e-07
AT4G16570	-1.01964	0.000252639	PRMT7
AT4G16610	1.79574	0.00458409
AT4G16740	4.03713	6.42604e-07	TPS03
AT4G16750	2.79122	1.09103e-09	ERF39
AT4G16880	1.02712	0.000218595
AT4G17080	-1.11748	2.95135e-07
AT4G17090	4.61567	7.82304e-21	CT-BMY
AT4G17245	-3.34731	4.0507e-16	ATL18
AT4G17250	-2.14985	1.56524e-11
AT4G17280	1.07884	0.00889588
AT4G17460	-2.77391	4.59348e-12	HAT1
AT4G17490	1.4011	0.00694643	ERF6
AT4G17550	2.92892	5.81278e-36	G3Pp4
AT4G17615	1.71488	7.43698e-09	CBL1
AT4G17670	3.53531	3.247e-08
AT4G17695	1.7579	1.60517e-06	KAN3
AT4G17770	1.60131	0.00133275	TPS5
AT4G17785	1.37689	0.0203338	MYB39
AT4G17870	-1.16267	4.03026e-06	PYR1
AT4G17880	1.83337	8.61895e-09	MYC4
AT4G18010	2.78187	6.07335e-11	IP5PII
AT4G18070	1.37146	5.17812e-15
AT4G18250	2.61545	0.00214983
AT4G18270	1.70144	3.42953e-05	TRANS11
AT4G18280	3.50768	2.90008e-20	GRPL1
AT4G18340	-1.10188	0.00264329
AT4G18360	1.03271	0.028785	GOX3
AT4G18390	2.47649	2.09054e-14	TCP2
AT4G18422	10.8109	4.70762e-13
AT4G18440	-1.51603	0.000107154
AT4G18510	-1.21256	0.0111488	CLE2
AT4G18520	-1.13172	0.000296579	SEL1
AT4G18700	1.61913	6.75533e-12	CIPK12
AT4G19060	-1.25287	2.40642e-07
AT4G19100	-1.10568	2.98325e-05	PAM68
AT4G19120	1.51051	2.25642e-06	ERD3
AT4G19160	-2.80523	5.4746e-18
AT4G19170	-2.79723	3.82169e-36	NCED4
AT4G19230	2.90588	1.06469e-10	CYP707A1
AT4G19420	-1.57519	5.63245e-08	PAE8
AT4G19450	1.97867	4.27665e-09
AT4G19460	1.80348	6.4118e-05
AT4G19520	1.16032	1.2121e-07
AT4G19530	-1.53648	3.04217e-09
AT4G19660	-1.53876	2.32873e-10	NPR4
AT4G19860	-1.7836	2.31069e-09
AT4G19865	-1.25529	0.00618326
AT4G19960	2.27266	3.92959e-26	KUP9
AT4G19970	2.55245	0.00221966
AT4G20170	1.77982	3.52475e-20	GALS3
AT4G20820	-1.00541	0.0234211	ATBBE18
AT4G20830	1.38235	1.61158e-08	ATBBE19
AT4G20880	1.05071	7.32656e-05
AT4G21215	2.06513	5.69888e-07
AT4G21445	-1.53389	2.55192e-05	CRR9
AT4G21510	-2.46666	3.15417e-14	FBS2
AT4G21570	1.42848	4.4224e-10
AT4G21680	1.66107	0.00309551	NPF7.2
AT4G21740	1.4158	3.13346e-06
AT4G21810	-1.08764	8.40836e-05	DER2.1
AT4G21840	1.18019	0.0431539	MSRB8
AT4G21870	-1.20102	0.00577497
AT4G21903	1.04529	0.033933
AT4G21920	3.03935	9.26562e-07
AT4G21970	-1.48377	0.0178849
AT4G21990	1.48678	0.00501333	37712
AT4G22270	1.45944	0.000338661	MRB1
AT4G22540	-1.63427	5.69473e-09	ORP2A
AT4G22580	1.42775	2.23355e-08
AT4G22590	1.80774	8.91213e-13	TPPG
AT4G22710	2.53623	0.000274435	CYP706A2
AT4G22758	2.82212	7.25715e-16
AT4G22770	1.5956	6.60168e-06	AHL2
AT4G22780	1.25699	7.13054e-05	ACR7
AT4G23140	3.19647	0.00156902	CRK6
AT4G23150	1.7047	0.0156139	CRK7
AT4G23170	1.65741	5.17057e-05	EP1
AT4G23200	1.33519	5.61105e-05	CRK12
AT4G23230	1.13035	0.0424141	CRK15
AT4G23260	1.06564	0.000383205	CRK18
AT4G23450	1.57204	6.00505e-05	AIRP1
AT4G23490	1.08877	6.14423e-05
AT4G23500	1.08008	8.04218e-05
AT4G23560	1.30142	0.0339979	GH9B15
AT4G23590	-1.05157	0.0368299
AT4G23630	1.98379	2.43984e-23	BTI1
AT4G23750	3.57768	1.3326e-34	CRF2
AT4G23820	-1.10156	0.000677163
AT4G23920	1.41858	1.27104e-09	UGE2
AT4G23990	2.34324	1.41119e-05	CSLG3
AT4G24050	-1.07753	0.0011126
AT4G24180	-2.2903	1.52856e-05	TLP1
AT4G24230	-2.96558	3.00446e-12	ACBP3
AT4G24240	1.61066	2.53342e-07	WRKY7
AT4G24275	-1.42581	0.000555598
AT4G24380	1.05839	0.000890304
AT4G24410	2.78854	9.79634e-09
AT4G24413	3.56532	2.30702e-21
AT4G24420	1.57842	0.0208958
AT4G24570	2.51112	2.97475e-06	DIC2
AT4G24800	-1.89743	7.61765e-26	ECIP1
AT4G24960	4.72166	8.87173e-50	HVA22D
AT4G25433	9.2809	2.8291e-25
AT4G25470	6.10226	6.71496e-35	CBF2
AT4G25480	7.33592	4.39467e-17	DREB1A
AT4G25490	4.68896	1.03639e-16	CBF1
AT4G25631	1.63495	0.00779906	U60.2F
AT4G25640	2.39606	1.40041e-22	DTX35
AT4G25700	2.62346	2.69683e-16	BETA-OHASE 1
AT4G25830	1.53097	5.09793e-07	CASPL2C1
AT4G25835	-1.50097	2.03716e-05
AT4G25850	1.0947	0.0445816	ORP4B
AT4G25940	-1.29182	5.32487e-05	PICALM2B
AT4G26050	-1.51959	0.0232782	PIRL8
AT4G26080	1.67897	2.65878e-09	ABI1
AT4G26150	3.28466	3.93628e-20	CGA1
AT4G26260	-4.25154	2.11269e-12	MIOX4
AT4G26288	-1.89883	0.012233
AT4G26400	-1.4306	1.41574e-05	BTL05
AT4G26530	-1.73326	4.14058e-07	FBA5
AT4G26540	-1.10298	0.00049871	RGFR3
AT4G26555	-1.05626	1.535e-05
AT4G26850	3.30945	1.6668e-23	VTC2
AT4G26950	3.07914	0.000985792
AT4G27030	2.25978	2.12382e-09	FADA
AT4G27260	-2.3736	2.86864e-05	WES1
AT4G27310	1.03648	5.01686e-06	BBX28
AT4G27360	5.89303	1.92906e-24
AT4G27440	-1.39591	1.15898e-05	PORB
AT4G27450	-3.65491	2.5216e-10	HUP54
AT4G27470	-2.02243	2.73079e-11	RMA3
AT4G27520	2.76243	6.55218e-13	ENODL2
AT4G27560	3.81544	9.51172e-12	UGT79B2
AT4G27652	2.75175	2.13881e-15
AT4G27654	1.64958	0.0181506
AT4G27657	4.2684	1.11908e-26
AT4G27680	1.04639	6.35221e-06
AT4G27710	-2.01964	1.62309e-19	CYP709B3
AT4G27740	-1.84752	3.4575e-05
AT4G27820	2.6009	1.53309e-08	BGLU9
AT4G27830	1.96963	5.12667e-08	BGLU10
AT4G27940	2.88594	3.08375e-15	MTM1
AT4G27950	1.8732	3.18755e-08	CRF4
AT4G28040	-1.65677	0.000374718	UMAMIT33
AT4G28140	4.99602	8.50298e-16	ERF54
AT4G28240	-3.43802	3.62946e-21	WIP1
AT4G28270	-3.27937	1.57227e-12	RMA2
AT4G28320	1.87938	1.86349e-10	MAN5
AT4G28330	1.49061	0.014044
AT4G28460	1.8687	0.0107237	PREPIP1
AT4G29110	4.02486	2.10964e-21
AT4G29150	1.14787	0.00591215	IQD25
AT4G29190	1.24535	5.07858e-06	OZF2
AT4G29310	-2.32934	2.94228e-13
AT4G29610	3.76341	4.59004e-07
AT4G29780	1.04587	0.000109678
AT4G30180	1.00956	0.0258152
AT4G30210	1.52028	1.23708e-13	ATR2
AT4G30240	1.0334	1.09715e-06
AT4G30270	1.10041	0.00103419	XTH24
AT4G30350	2.23226	3.68381e-31	SMXL2
AT4G30370	1.53495	0.00389053	IDF1
AT4G30410	-1.59206	0.00040659	IBL1
AT4G30470	2.94657	5.92069e-24
AT4G30610	1.09074	0.00213318	BRS1
AT4G30650	1.84317	0.000607609
AT4G30690	-2.06693	1.02274e-13	ATINFC-4
AT4G30830	2.38807	8.93466e-06
AT4G30940	-1.09089	0.00213968
AT4G30980	1.14816	0.00477353	LRL2
AT4G31050	-1.90535	8.35786e-12	LIP2
AT4G31060	-2.44655	4.26183e-09
AT4G31270	-1.38961	0.000252639	IDAP2
AT4G31380	-2.55898	0.00280667	FLP1
AT4G31390	1.06227	7.206e-07	ACDO1
AT4G31400	1.11748	0.00755056	CTF7
AT4G31405	-1.2378	0.037839
AT4G31408	-1.28023	0.0231068
AT4G31510	-1.89188	1.643e-10
AT4G31800	2.92356	9.50687e-14	WRKY18
AT4G31870	2.72417	1.16735e-07	GPX7
AT4G32020	2.20861	2.30495e-39
AT4G32190	2.21459	8.18041e-10	PII1
AT4G32280	-5.76401	1.90978e-05	IAA29
AT4G32400	1.04154	3.73254e-05	SHS1
AT4G32480	-4.81015	2.25241e-24
AT4G32770	1.42068	1.77741e-06	VTE1
AT4G32800	3.86301	1.84184e-30	ERF043
AT4G32920	1.77477	2.41295e-10
AT4G32990	-1.45729	0.00334116
AT4G33000	-1.04217	5.46239e-06	CBL10
AT4G33040	1.90297	0.000900548	ROXY21
AT4G33050	1.36939	0.000224136	EDA39
AT4G33070	3.37946	1.94636e-15	PDC1
AT4G33180	1.04428	1.21616e-06
AT4G33300	1.29871	1.17955e-06	ADR1-L1
AT4G33440	1.77765	3.59719e-06
AT4G33467	1.42785	0.0044055
AT4G33490	-1.03776	0.0107457
AT4G33560	1.47834	1.54041e-05	WIP5
AT4G33666	-3.83507	3.16008e-06
AT4G33670	-1.42643	8.66618e-15
AT4G33920	2.28522	8.80778e-23	APD5
AT4G33960	-1.61914	3.51771e-05
AT4G33980	6.40925	1.89857e-75	COR28
AT4G33985	2.72923	3.24928e-09
AT4G34030	-1.75784	8.34388e-07	MCCB
AT4G34050	1.19101	3.58512e-05	CCoAOMT1
AT4G34120	1.1092	8.05404e-05	LEJ1
AT4G34138	-1.08404	0.00226471	UGT73B1
AT4G34150	1.89799	4.25735e-12
AT4G34230	1.35038	0.00018779	CAD5
AT4G34250	-1.13588	0.00398203	KCS16
AT4G34550	5.52213	2.59177e-07
AT4G34590	2.36107	4.5446e-08	GBF6
AT4G34610	1.79358	9.14499e-08	BLH6
AT4G34650	1.43436	1.38072e-09	SQS2
AT4G34680	1.19501	2.98585e-06	GATA3
AT4G34710	2.3814	1.55865e-09	ADC2
AT4G34740	2.52746	3.71154e-13	ASE2
AT4G34760	-1.26899	0.00139557	SAUR50
AT4G34770	-3.10191	0.000460589	SAUR1
AT4G34790	-2.82514	0.00315029	SAUR3
AT4G34810	-2.61946	0.0039001	SAUR5
AT4G34900	-1.07792	0.000102955	XDH2
AT4G34950	3.72395	2.70618e-10	MFS1
AT4G34990	1.92519	1.26922e-05	MYB32
AT4G35030	1.09349	0.000673745
AT4G35090	1.43057	8.82151e-07	CAT2
AT4G35270	1.72761	1.24209e-05	NLP2
AT4G35300	1.44367	7.2281e-07	TMT2
AT4G35320	2.5135	8.86405e-23
AT4G35420	-1.96243	1.5264e-07	DRL1
AT4G35440	-1.4863	7.87979e-09	CLC-E
AT4G35470	-1.50485	1.24025e-08	PIRL4
AT4G35480	2.44616	5.5178e-10	RHA3B
AT4G35510	1.16753	5.21265e-06
AT4G35630	1.15912	1.15641e-06	PSAT1
AT4G35750	-1.29737	0.000866153
AT4G35770	-1.36412	0.0303746	SEN1
AT4G35985	1.47318	6.08435e-06
AT4G36010	5.41087	9.50036e-47
AT4G36020	1.94996	1.82217e-10	CSDP1
AT4G36050	-1.00455	0.000670549	APE2
AT4G36110	2.2034	0.000186313	SAUR9
AT4G36220	1.3007	5.4488e-05	FAH1
AT4G36240	1.05347	0.00933932	GATA7
AT4G36360	1.29498	2.29828e-05	BGAL3
[truncated: 684 more rows]

## Sheet: Nvs3d
Supplementary Table 4
(B) Differentially regulated genes after 3d of cold exposure
Gene	log2FoldChange	padj	Name
AT1G01060	4.18741	4.5167e-63	LHY
AT1G01180	-1.6148	4.61747e-06
AT1G01240	-2.46403	1.01799e-11
AT1G01420	1.62133	2.67036e-08	UGT72B3
AT1G01430	-1.13181	6.61965e-08	TBL25
AT1G01470	1.26981	9.59771e-12	LEA14
AT1G01520	5.21213	1.56903e-64	ASG4
AT1G01560	2.62644	3.65278e-05	MPK11
AT1G01580	1.25658	0.000489942	FRO2
AT1G01600	1.26234	0.00425772	CYP86A4
AT1G01620	-1.76077	1.67402e-12	PIP1C
AT1G01680	3.65945	7.64334e-05	PUB54
AT1G01770	-1.37276	4.01171e-05
AT1G01940	1.06155	1.36907e-06
AT1G02300	-1.04994	0.000123704	ATCATHB1
AT1G02310	1.78627	0.000498427	MAN1
AT1G02340	-1.70373	0.00155445	HFR1
AT1G02350	-1.58162	0.00193452
AT1G02460	3.17276	1.564e-13
AT1G02470	2.07226	0.000848941
AT1G02610	-2.9103	9.91326e-10
AT1G02620	-1.95362	0.000134633
AT1G02630	-1.57373	0.0117119
AT1G02640	-1.8868	7.99328e-05	BXL2
AT1G02650	-1.17758	0.0126147
AT1G02660	-1.67711	0.00666071	PLIP2
AT1G02800	-2.25729	0.00060292	CEL2
AT1G02820	3.84895	2.81927e-18	LEA3
AT1G02830	1.45752	0.0165289
AT1G02870	1.10974	1.64826e-05
AT1G03090	-1.00638	0.0436614	MCCA
AT1G03100	1.1738	0.00419441
AT1G03130	-2.97039	9.33165e-21	PSAD-2
AT1G03220	-1.43858	4.86944e-06	SAP2
AT1G03410	-3.09069	1.18989e-07	2A6
AT1G03457	-1.20732	0.000857343	BRN2
AT1G03510	1.51179	0.000310432
AT1G03530	1.20501	1.9472e-05	NAF1
AT1G03600	-1.03295	1.1355e-12	PSB27
AT1G03610	-2.20231	4.33002e-12
AT1G03850	-1.65915	0.000616691	GRXS13
AT1G03905	2.10432	1.07961e-12	ABCI19
AT1G04107	-1.12185	0.000260321
AT1G04217	-1.1827	0.0261969
AT1G04280	-1.32958	6.62451e-12	NADKC
AT1G04350	-1.15527	3.54791e-07
AT1G04570	6.56977	1.88643e-58
AT1G04620	2.08778	1.54492e-16	HCAR
AT1G04880	1.2256	0.00540773	HMGBD15
AT1G04900	1.24841	7.99328e-05
AT1G05000	2.22571	5.71769e-06	PFA-DSP1
AT1G05010	-1.42426	3.11266e-07	EFE
AT1G05020	-2.55751	1.84497e-07	AP180
AT1G05060	-1.0268	1.31318e-05
AT1G05100	1.20364	0.00510907	MAPKKK18
AT1G05170	1.3451	4.97694e-06
AT1G05207	-1.89113	5.6229e-06
AT1G05213	1.92416	3.7511e-07
AT1G05310	-1.20007	0.00499378
AT1G05675	1.62391	0.0101946
AT1G05680	1.65872	0.0107118	UGT74E2
AT1G05700	1.42188	0.000507257
AT1G05730	1.83413	0.000507392
AT1G05870	1.5826	1.94613e-07
AT1G05880	1.44058	0.0160355	ARI12
AT1G06080	-1.26801	0.0248337	ADS1
AT1G06120	-1.13213	0.0300234	ADS1.4
AT1G06140	1.25794	0.00114475	MEF3
AT1G06180	2.87705	4.17073e-11	MYB13
AT1G06283	-2.01776	7.35093e-05
AT1G06473	-1.76522	0.000150357
AT1G06540	3.69044	0.00025185
AT1G06573	-1.11013	0.0118182
AT1G06620	-2.02577	2.45144e-07
AT1G06680	-1.54552	2.01082e-25	PSBP-1
AT1G06720	1.04792	3.53039e-05
AT1G06980	1.51931	1.18731e-05
AT1G07010	1.32168	3.40083e-06	SLP1
AT1G07050	3.42801	8.13517e-08	FITNESS
AT1G07070	1.2729	1.05629e-05
AT1G07150	1.90572	2.08074e-11	MAPKKK13
AT1G07180	1.16506	0.000200273	NDA1
AT1G07187	-3.54311	9.86416e-14
AT1G07323	1.00274	3.46877e-07
AT1G07367	2.76685	0.00125547
AT1G07373	1.80351	0.00599175
AT1G07450	1.00036	0.0170245
AT1G07587	1.64593	0.00285733
AT1G07607	1.80899	6.19883e-07
AT1G07610	-1.48531	8.33574e-07	MT1C
AT1G07743	-2.55177	0.00108274
AT1G08070	1.05397	0.00199195	OTP82
AT1G08165	1.04115	0.0117357
AT1G08170	1.412	0.0176706	HTB8
AT1G08300	-1.11273	0.00242084	NVL
AT1G08380	-2.18739	4.97486e-21	PSAO
AT1G08410	1.26132	1.07783e-05	LSG1-2
AT1G08450	-1.02163	4.27519e-05	CRT3
AT1G08580	1.25176	1.22507e-05
AT1G08630	-1.16705	0.0133493	THA1
AT1G08687	-1.24343	0.0219309
AT1G08733	4.35866	9.07278e-06
AT1G08840	1.03723	6.89769e-06	emb2411
AT1G08900	-1.35367	7.15922e-08
AT1G09010	-1.03276	1.57201e-09
AT1G09190	1.11594	0.00118566
AT1G09350	5.47607	7.46486e-07	GolS3
AT1G09390	-2.14774	3.26055e-11
AT1G09415	-1.09908	0.000582652	NIMIN-3
AT1G09420	-1.42671	4.56906e-05	G6PD4
AT1G09460	-1.42608	0.000121738
AT1G09570	-1.11384	0.00471528	PHYA
AT1G09575	-1.84175	5.19923e-05	MCU1
AT1G09590	1.00935	0.000164704
AT1G09750	-1.44167	3.22097e-08
AT1G09780	1.69912	8.49837e-10	iPGAM1
AT1G09794	1.03845	0.00300086
AT1G09950	1.73609	0.00205833	RAS1
AT1G10140	-1.56404	0.000147815
AT1G10155	3.90375	6.37074e-13	PP2-A10
AT1G10240	-1.07741	0.000194809	FRS11
AT1G10270	1.23279	3.11974e-05	GRP23
AT1G10360	-1.14191	9.26557e-07	GSTU18
AT1G10370	1.72509	0.000402636	ERD9
AT1G10410	1.72446	1.54915e-07
AT1G10490	1.15553	3.01851e-05
AT1G10560	-1.14415	0.00544858	PUB18
AT1G10900	-1.42999	6.47966e-06	PIP5K7
AT1G11070	-2.43409	1.37782e-06
AT1G11175	-1.59399	1.84257e-06
AT1G11180	-1.65884	1.27634e-12	SCAMP2
AT1G11210	3.85082	9.5697e-23
AT1G11260	-2.68159	3.57968e-08	STP1
AT1G11270	-1.23662	0.00554651
AT1G11330	1.18373	8.96745e-06	RDA2
AT1G11360	-1.45105	2.22356e-08
AT1G11390	1.02347	1.44832e-05	ABC1K10A
AT1G11740	-3.02596	3.04324e-05
AT1G12080	-2.72702	8.3657e-07
AT1G12230	-1.15984	3.37254e-07	GSM2-LIKE
AT1G12240	-1.36578	3.5069e-05	ATBETAFRUCT4
AT1G12370	2.51706	2.65322e-11	PHR1
AT1G12420	1.39295	1.13814e-05	ACR8
AT1G12780	-2.39657	3.9652e-09	UGE1
AT1G12790	-1.11993	0.00244838
AT1G12910	-1.23835	1.62653e-07	ATAN11
AT1G12970	-1.21744	4.73919e-05	PIRL3
AT1G13030	1.21837	0.000119538	COILIN
AT1G13080	-2.01465	5.52376e-20	CYP71B2
AT1G13090	-1.06282	0.00692503	CYP71B28
AT1G13160	1.01941	9.96348e-05
AT1G13245	-2.24547	4.10171e-25	RTFL17
AT1G13270	1.30405	4.78579e-06	MAP1C
AT1G13300	-1.71779	1.73178e-05	HRS1
AT1G13330	1.04153	0.015636	AHP2
AT1G13410	1.98399	2.81177e-09
AT1G13420	-1.12667	0.0187951	ST4B
AT1G13450	-1.00569	0.00100126	GT-1
AT1G13540	-1.25719	0.00349877
AT1G13608	2.94734	0.000264391
AT1G13650	-5.16776	3.05861e-20
AT1G13700	-2.49859	2.46721e-15	PGL1
AT1G13740	1.07109	0.000998483	AFP2
AT1G13950	-1.24023	2.00204e-05	ELF5A-1
AT1G14120	-3.30324	1.50595e-09	ATDAO2
AT1G14200	-2.16318	3.76982e-10	SNIPER1
AT1G14250	-1.54662	0.00053371
AT1G14520	-1.67757	0.000677816	MIOX1
AT1G14700	-3.12298	4.62082e-20	PAP3
AT1G14820	1.38309	3.42609e-14
AT1G14890	-1.19474	0.000661594
AT1G14900	-1.43225	1.28706e-10	HMGA
AT1G14920	-1.2977	0.000221121	GAI
AT1G14960	-2.4139	0.000412584
AT1G15040	-1.80158	0.000938573	GAT1_2.1
AT1G15100	1.56056	7.65251e-05	RHA2A
AT1G15175	-3.65853	1.75059e-08
AT1G15330	-1.82521	0.00315873
AT1G15380	-1.20351	0.000253038	GLYI4
AT1G15420	1.19297	2.31312e-06	PCP1
AT1G15440	1.54199	4.35519e-09	PWP2
AT1G15550	-1.12592	0.0012402	GA3OX1
AT1G15670	-1.83775	4.66366e-06	KMD2
AT1G15740	-1.80733	1.2246e-09
AT1G15820	-2.21619	2.12365e-16	LHCB6
AT1G15830	-4.09726	7.79857e-35
AT1G15870	1.13838	0.0165071
AT1G15890	-1.03478	0.0123521
AT1G15980	-1.05017	0.000172965	PnsB1
AT1G16060	1.21368	0.00482727	ADAP
AT1G16110	-1.98096	5.38983e-07	WAKL6
AT1G16300	1.0154	0.000143922	GAPCP-2
AT1G16310	1.36203	0.000199908
AT1G16370	-1.71782	1.46021e-05	OCT6
AT1G16420	2.0132	0.00346651	MC8
AT1G16500	2.6185	7.14647e-11
AT1G16510	1.2027	0.00140247	SAUR41
AT1G16515	1.26026	0.01628
AT1G16730	1.01301	0.00426299	UP6
AT1G16780	-1.49768	4.96268e-07	VHP2;2
AT1G16850	5.26526	3.6025e-65
AT1G17050	1.58413	5.3353e-06	SPS2
AT1G17100	2.60063	7.02831e-13	HBP1
AT1G17147	-2.51578	0.000106411
AT1G17170	2.08156	6.38095e-05	GSTU24
AT1G17180	1.57119	1.50148e-05	GSTU25
AT1G17300	-1.29092	0.0208052
AT1G17340	-1.20506	7.93908e-07	SAC5
AT1G17380	1.51351	0.00250428	JAZ5
AT1G17430	-1.66911	3.23586e-05
AT1G17460	-1.11118	0.00830884	TRFL3
AT1G17665	4.90742	1.02279e-27
AT1G17745	1.49145	0.000379215	PGDH
AT1G17850	-1.21536	4.09557e-06
AT1G17970	-1.22339	3.13641e-06	CTL15
AT1G18265	-1.77941	1.28118e-05
AT1G18300	-1.27361	0.000257495	NUDT4
AT1G18460	-1.41102	1.0829e-08	ALPHA/BETA-HYDROLASE
AT1G18620	-2.25615	4.99943e-19	TRM3
AT1G18660	1.18943	1.45854e-07	IAP1
AT1G18850	1.08965	7.97358e-05	PCP2
AT1G18900	1.63973	4.51082e-12
AT1G18990	-3.00131	0.00133878
AT1G19000	-2.2088	4.41436e-39
AT1G19140	1.32244	3.57899e-09	COQ9
AT1G19150	-1.60012	3.00363e-06	LHCA6
AT1G19180	1.09677	8.93495e-05	JAZ1
AT1G19250	1.14118	0.0327416	FMO1
AT1G19310	-1.18927	1.10777e-06
AT1G19490	3.15436	1.77089e-28	BZIP62
AT1G19650	-1.12095	1.72057e-06
AT1G19660	-1.96307	4.10318e-10	BBD2
AT1G19770	-1.96119	1.03919e-15	PUP14
AT1G20160	-1.18003	0.000292892	ATSBT5.2
AT1G20340	-1.16612	5.37072e-07	DRT112
AT1G20440	1.44606	0.000542928	COR47
AT1G20450	2.85905	2.57437e-34	ERD10
AT1G20480	-1.30583	0.00206955
AT1G20570	-1.2119	0.0054974
AT1G20620	-2.25621	5.12329e-11	CAT3
AT1G21100	-3.19282	1.04674e-09	IGMT1
AT1G21130	-1.23063	7.48553e-07	IGMT4
AT1G21240	1.0731	0.0322919	WAK3
AT1G21250	1.76296	0.00291321	WAK1
AT1G21350	-1.34608	2.01718e-11
AT1G21400	-1.19563	0.00811512
AT1G21460	1.15267	0.000184717	SWEET1
AT1G21500	-3.36007	7.62863e-24
AT1G21650	1.76288	5.40436e-21	SECA2
AT1G21680	-1.19608	4.46014e-08
AT1G21830	-1.76522	1.9303e-05
AT1G21840	-1.01626	0.00543862	UREF
AT1G21890	1.12701	0.0266035	UMAMIT19
AT1G21910	-1.025	0.00310763	DREB26
AT1G21920	-1.57682	6.16504e-08	MRF1
AT1G22220	1.30546	0.0112576	AUF2
AT1G22330	-1.63572	0.000408614
AT1G22360	-1.54373	1.40931e-13	UGT85A2
AT1G22370	-2.45072	6.8974e-11	UGT85A5
AT1G22500	-1.60398	2.72576e-08	ATL15
AT1G22540	-1.03537	5.20007e-05	NPF5.10
AT1G22640	-2.00603	5.28755e-26	MYB3
AT1G22650	-1.04534	0.000213985	A/N-InvD
AT1G22770	2.07676	1.84729e-13	GI
AT1G22890	-2.68638	7.48553e-07	STMP2
AT1G23010	2.12553	4.84589e-11	LPR1
AT1G23060	-1.29549	0.0104093	MDP40
AT1G23080	-1.81948	2.92706e-06	PIN7
AT1G23090	1.21878	3.68775e-06	SULTR3;3
AT1G23100	1.88888	2.26881e-06
AT1G23120	-1.78599	0.000831806
AT1G23140	1.74789	3.42364e-05	CAR8
AT1G23390	-4.41982	9.87084e-29	KFB
AT1G23400	-1.39914	1.46697e-08	CAF2
AT1G23480	-1.1864	0.000358771	CSLA03
AT1G23550	1.5322	1.4968e-05	SRO2
AT1G23760	-1.59915	0.0011058	JP630
AT1G23850	-1.32494	0.00199709
AT1G23860	-1.02497	9.36194e-05	RSZ21
AT1G23870	-1.7534	7.04437e-07	TPS9
AT1G24090	2.16495	5.74737e-06	RNH1C
AT1G24095	1.59691	0.000959068
AT1G24145	1.01195	0.0339233
AT1G24147	1.80857	0.00398424
AT1G24148	-1.65394	9.71594e-07
AT1G24160	-1.09612	0.000125986
AT1G24310	1.03586	1.30152e-06	NUP54
AT1G24440	-1.56527	1.16887e-08
AT1G24580	4.50541	4.79526e-14
AT1G25230	-2.41709	1.50595e-09
AT1G25250	2.61868	1.58183e-06	IDD16
AT1G25275	-1.15569	2.04051e-05
AT1G25520	1.21266	5.60048e-06	PML4
AT1G25550	-1.19382	3.709e-07	HHO3
AT1G25560	-1.90286	5.06118e-06	TEM1
AT1G26440	-1.42098	6.96039e-06	UPS5
AT1G26500	1.32247	0.00508712
AT1G26540	-1.28759	0.000901948
AT1G26660	1.11963	8.0719e-06
AT1G26670	-1.27634	1.89649e-08	VTI1B
AT1G26770	2.10074	5.772e-07	EXPA10
AT1G26790	6.71568	1.72884e-13	CDF6
AT1G26800	-3.67751	3.18535e-14	MPSR1
AT1G26840	1.28483	0.000528473	ORC6
AT1G26920	-1.12961	3.0651e-06
AT1G26945	-1.61019	9.57208e-06	KDR
AT1G27090	-1.18306	6.48685e-08
AT1G27100	-1.02563	6.68715e-08
AT1G27200	1.63145	2.02045e-14
AT1G27210	-1.5983	4.80372e-09
AT1G27290	-2.24938	1.04722e-15
AT1G27360	1.17854	2.14631e-05	SPL11
AT1G27470	1.1389	1.52866e-05
AT1G27670	-1.62026	0.00161576
AT1G27730	1.64598	0.000328189	STZ
AT1G27760	2.34363	9.69153e-15	SAT32
AT1G27940	2.0481	0.000815307	ABCB13
AT1G28070	-1.10622	0.00132269
AT1G28260	-1.21077	0.00336069
AT1G28330	-3.62574	9.54258e-12	DYL1
AT1G28360	2.02605	0.000103812	ERF12
AT1G28600	1.39112	0.00141601
AT1G28660	-1.38564	8.57015e-07
AT1G28670	-1.34946	8.62089e-07	ARAB-1
AT1G29030	1.09892	5.65463e-08
AT1G29170	1.31584	6.21575e-07	WAVE2
AT1G29320	1.53628	4.74421e-08
AT1G29380	1.0336	0.00110262
AT1G29390	1.17289	1.00226e-05	COR314-TM2
AT1G29430	-1.19222	0.0064791	SAUR62
AT1G29440	-1.32392	0.00968662	SAUR63
AT1G29450	-1.81581	6.4012e-05	SAUR64
AT1G29460	-3.66389	2.07917e-05	SAUR65
AT1G29465	-3.22728	1.51229e-09
AT1G29500	-1.77424	0.00027497	SAUR66
AT1G29510	-1.50048	1.144e-05	SAUR67
AT1G29910	-1.49371	8.73366e-12	CAB3
AT1G30190	1.42702	0.0158106
AT1G30200	-1.64997	1.17032e-12
AT1G30240	1.5787	5.49777e-08
AT1G30280	1.11054	0.0151779	AUXILIN-LIKE7
AT1G30380	-1.8028	2.05049e-27	PSAK
AT1G30520	-1.59143	1.09957e-06	AAE14
AT1G30530	1.9245	4.45917e-06	UGT78D1
AT1G30620	1.19966	1.42433e-05	MUR4
AT1G30720	-1.7444	0.000141688	ATBBE10
AT1G30750	-1.08455	0.0182582
AT1G30820	-1.27786	0.000297838	CTPS1
AT1G30960	1.43156	1.6182e-05	ERA-2
AT1G31170	-1.26767	1.07324e-08	SRX
AT1G31290	-2.17937	1.15313e-05	AGO3
AT1G31330	-1.73089	1.63727e-30	PSAF
AT1G31580	1.30982	0.0034441	ECS1
AT1G31660	1.2589	4.6652e-06	ENP1
AT1G31812	-1.28415	1.40887e-08	ACBP6
AT1G31935	-1.29622	0.00241746	SORF12
AT1G32100	-1.08337	0.00534977	PRR1
AT1G32170	-1.03611	0.00160958	XTH30
AT1G32415	1.04475	0.00169942	RRD2
AT1G32440	1.33876	6.26214e-07	PKp3
AT1G32700	-1.37039	6.35266e-05
AT1G32760	-1.16246	0.00367328
AT1G32870	2.05768	1.80738e-14	NAC13
AT1G32880	1.32033	0.0222419
AT1G32900	3.35047	2.18562e-20	GBSS1
AT1G32928	-2.144	2.72676e-06
AT1G32950	1.50473	0.00223167
AT1G33055	-3.4805	1.35001e-05	HUP32
AT1G33110	1.22367	6.58491e-05
AT1G33240	-1.88008	4.33591e-28	GTL1
AT1G33340	-1.34689	0.00688496	PICALM8
AT1G33475	-1.46863	0.00837979
AT1G33610	-1.42294	3.05562e-07
AT1G33615	-1.07249	0.0118464
AT1G33770	-2.48586	0.00174294
AT1G33780	-1.33737	1.08257e-06
AT1G33960	3.20062	2.52671e-08	AIG1
AT1G34050	1.00046	0.0481461
AT1G34160	1.03526	0.00293106
AT1G34380	1.21482	3.89719e-05	OEX2
AT1G34460	-1.27409	0.00324163	CYCB1;5
AT1G35180	-1.35844	0.0143948
AT1G35230	2.21306	0.00112513	AGP5
AT1G35430	-1.71013	4.78522e-05
AT1G35530	1.08356	0.00305309	FANCM
AT1G35580	-1.10343	8.4428e-05	CINV1
AT1G35612	-2.18501	6.18494e-07
AT1G36060	-1.37013	0.00124309	TG
AT1G36940	-1.39464	0.00481223
AT1G43020	-1.02498	0.031782
AT1G43160	1.3486	0.0079239	RAP2.6
AT1G43910	1.90198	5.85707e-07
AT1G44100	1.05913	4.42364e-05	AAP5
AT1G44350	-1.6376	2.8231e-06	ILL6
AT1G44770	-1.38849	4.26476e-08
AT1G44800	1.75851	6.03073e-08	SIAR1
AT1G45015	-2.07869	0.00498773
AT1G45230	1.0136	0.000186244
AT1G45248	-1.02169	0.0032434
AT1G46768	2.27291	3.57344e-08	RAP2.1
AT1G47395	2.50816	0.000281423	FEP2
AT1G47400	2.52298	0.000241265	FEP3
AT1G47490	1.04005	7.6914e-06	RBP47C
AT1G47500	1.13415	8.73257e-05	RBP47C'
AT1G47530	1.04544	1.35354e-06	DTX33
AT1G47655	-1.45367	0.00149066
AT1G47710	1.00062	7.42573e-05	SERPIN1
AT1G48100	2.60293	4.35265e-10	PGX3
AT1G48210	1.3872	4.92988e-08
AT1G48280	-1.07047	0.000822904	IPGAL2
AT1G48330	-1.53019	0.000161754
AT1G48430	-1.10778	0.00103346
AT1G48570	1.45372	0.00016803
AT1G48600	-1.16664	0.000259513	PMEAMT
AT1G48630	1.13848	6.62552e-05	RACK1B_AT
AT1G48650	1.28414	2.09842e-07
AT1G49032	-1.54809	1.43898e-06
AT1G49130	-5.81861	5.17938e-12	BBX17
AT1G49200	-1.06401	0.0411517	ATL75
AT1G49210	-2.73068	0.000181184	ATL76
AT1G49230	1.3792	0.00221344	ATL78
AT1G49320	-1.08065	0.00331713	USPL1
AT1G49405	2.0198	0.000736383	CASPL5C3
AT1G49450	2.42597	3.67959e-07	AIW2
AT1G49500	-3.51677	1.14235e-08
AT1G49540	1.01616	2.24907e-06	ELP2
AT1G49600	1.08357	1.44986e-09	RBP47A
AT1G49720	2.28799	9.36265e-11	ABF1
AT1G49730	-1.37806	2.26353e-06
AT1G50040	-1.57006	0.00270465
AT1G51090	5.01674	1.28355e-17	ATHMAD1
AT1G51140	-1.38185	0.00497266	FBH3
AT1G51340	1.06042	0.0095369	MATE
AT1G51360	-1.28959	6.66885e-07	DABB1
AT1G51380	1.9177	5.00072e-06
AT1G51430	-2.14735	4.9162e-10
AT1G51913	1.0017	0.0485093
AT1G52060	-2.0112	0.000387858
AT1G52100	-2.97588	3.53222e-14
AT1G52190	-2.34445	8.50037e-10	NPF1.2
AT1G52220	-1.13206	2.54759e-08	CURT1C
AT1G52230	-1.98016	1.19631e-15	PSAH2
AT1G52240	-1.83429	0.00017162	ROPGEF11
AT1G52245	-2.94542	1.79224e-07
AT1G52450	1.82743	6.35051e-09
AT1G52640	1.08614	0.0143593
AT1G52750	-1.54909	7.42833e-06
AT1G52770	2.13908	0.000739507
AT1G52830	-2.03832	0.00503757	IAA6
AT1G52930	1.61559	1.08724e-06	ATBRX1-2
AT1G53035	2.82188	1.44662e-14
AT1G53090	1.49798	2.09842e-07	SPA4
AT1G53180	-1.66164	6.23616e-11
AT1G53520	-1.51796	4.39909e-07	FAP3
AT1G53560	-1.70997	9.31293e-06
AT1G53625	2.01193	0.00144318
AT1G53640	-2.1043	0.000479959
AT1G53645	1.02554	3.49198e-05
AT1G53830	-1.48729	9.83524e-05	PME2
AT1G53840	-1.21309	6.67588e-07	PME1
AT1G54010	-1.37998	0.00202397	GLL23
AT1G54120	-1.14804	0.0145328
AT1G54310	1.0805	4.33948e-05
AT1G54570	2.30203	2.09554e-11	PES1
AT1G54575	1.29735	0.000328898
AT1G54740	-2.39844	2.29528e-09
AT1G54780	-1.08488	1.84778e-05	TLP18.3
AT1G55000	-1.1933	1.30292e-07
AT1G55040	1.09446	5.86055e-05	SED1
AT1G55205	1.16767	0.0010875
AT1G55210	1.28611	0.00124256
AT1G55240	-1.32001	0.00982687
AT1G55310	-2.16353	4.06572e-15	SCL33
AT1G55320	1.23932	0.000183753	AAE18
AT1G55500	1.19722	4.13485e-08	ECT4
AT1G55520	-1.00639	2.45032e-07	TBP2
AT1G55670	-1.80643	4.50926e-17	PSAG
AT1G55910	1.37459	8.9406e-06	ZIP11
AT1G56060	1.18626	0.0283397	ATHCYSTM3
AT1G56080	1.08774	0.00258323	NAIP3
AT1G56110	1.46806	5.10941e-06	NOP56
AT1G56120	1.6215	1.34475e-08
AT1G56130	1.56638	3.88849e-07
AT1G56220	-2.03306	8.98447e-09
AT1G56280	-1.88145	7.03496e-13	DI19
AT1G56430	1.00124	0.0336538	NAS4
AT1G56650	2.28467	0.00365626	PAP1
AT1G56690	1.61718	0.000101615
AT1G56720	-1.41924	2.24329e-07
AT1G57990	-1.59023	6.52427e-08	PUP18
AT1G58150	-1.93581	1.66854e-05
AT1G58170	1.11575	0.013874
AT1G58190	-1.8669	5.92285e-05	RLP9
AT1G58370	-1.67711	2.11464e-05	RXF12
AT1G58420	1.94297	0.00542594
AT1G59580	-1.47758	1.16495e-06	MPK2
AT1G59590	-1.9731	9.24822e-05	ZCF37
AT1G59620	-1.8659	1.34611e-10	CW9
AT1G59710	1.12964	2.68593e-07
AT1G59730	2.46112	0.000329493	TH7
AT1G59990	1.39492	4.11892e-06	EMB3108
AT1G60080	1.30945	1.48888e-06
AT1G60140	-1.12301	0.00512866	TPS10
AT1G60190	4.39408	2.32936e-18	PUB19
AT1G60270	1.99435	1.99327e-07	BGLU6
AT1G60470	1.48966	0.00431336	GolS4
AT1G60640	1.17149	8.81241e-07
AT1G60750	-1.46825	0.000340037
AT1G60890	1.28267	1.45759e-07	PIP5K8
AT1G61100	-1.10312	6.02342e-06
AT1G61340	1.19662	0.000660779	FBS1
AT1G61380	1.61639	3.40063e-07	SD1-29
AT1G61390	1.04834	0.0198508
AT1G61400	1.34404	0.000560279
AT1G61420	1.3592	7.63145e-06
AT1G61490	1.57079	5.55701e-06
AT1G61520	-1.81565	7.15507e-25	LHCA3
AT1G61590	-1.597	5.20421e-07	PBL15
AT1G61640	1.82065	2.05164e-12
AT1G61795	-2.82653	4.39432e-09
AT1G61800	6.57026	7.41463e-12	GPT2
AT1G61810	-2.1276	0.00204062	BGLU45
AT1G61890	1.93278	2.53033e-05
AT1G62280	-2.80082	7.93132e-05	SLAH1
AT1G62290	-1.40451	0.00644564	PASPA2
AT1G62422	-1.33138	0.000155011
AT1G62480	-1.4017	0.00365737
AT1G62510	-2.97424	1.34188e-16
AT1G62570	1.98319	1.14565e-06	FMO GS-OX4
AT1G62660	-1.12356	1.3552e-05	VI1
AT1G62710	2.42834	2.26301e-15	BETA-VPE
AT1G62720	1.00468	0.0140185	NG1
AT1G62730	1.01767	0.000509218
AT1G62870	1.94549	0.000564685
AT1G63240	-1.04207	0.000625215
AT1G63245	1.23085	0.0198021	CLE14
AT1G63250	1.58318	5.00859e-07
AT1G63295	-1.08271	0.0286468
AT1G63800	-2.27064	9.42462e-13	UBC5
AT1G64185	1.66535	2.22614e-05	GLXI-LIKE;5
AT1G64200	-3.07769	1.65458e-24	VHA-E3
AT1G64310	1.28521	0.00808396	OTP71
AT1G64320	1.04678	0.00881629
AT1G64460	-1.0207	8.77834e-06	PI4K&#947;2
AT1G64500	1.41504	2.64826e-09
AT1G64590	-1.57353	1.93755e-05
AT1G64600	1.19828	1.15313e-05
AT1G64720	-2.00644	5.75102e-14	CP5
AT1G64760	1.09665	0.000240382	ZET
AT1G64780	1.92985	2.30137e-07	AMT1;2
AT1G64890	1.52713	4.2018e-07
AT1G64950	1.20718	0.000160254	CYP89A5
AT1G64970	1.62329	4.83346e-06	G-TMT
AT1G65030	1.73997	1.5212e-09
AT1G65060	3.49208	1.7322e-15	4CL3
AT1G65110	1.59264	0.00101488
AT1G65310	-1.60994	0.00112513	XTH17
AT1G65481	3.04118	0.000192394
AT1G65490	1.06442	0.0221817	STMP5
AT1G65560	1.15686	0.000244984
AT1G65700	1.037	0.000125482	LSM8
AT1G65820	1.06185	4.11994e-07
AT1G65845	-1.29523	2.10338e-05
AT1G65860	1.79377	0.000230605	FMO GS-OX1
AT1G65870	1.66631	0.00108978
AT1G65970	-4.78496	6.68152e-10	TPX2
AT1G65985	-1.27272	7.39433e-06
AT1G66150	-1.16258	6.04943e-09	TMK1
AT1G66230	-2.59662	2.21512e-06	MYB20
AT1G66390	8.79847	2.05257e-06	MYB90
AT1G66540	1.09643	0.00225907
AT1G66670	1.12122	1.4818e-10	CLPP3
AT1G66890	-1.56506	5.9636e-09
AT1G66930	-1.38366	0.0194589	LRK10L2
AT1G67050	-1.25078	0.00010044
AT1G67080	-1.06613	0.000622427	ABA4
AT1G67265	-3.3396	0.000211701	RTFL21
AT1G67360	2.30658	1.83527e-07	LDAP1
AT1G67590	-1.95794	1.51267e-13
AT1G67850	2.01492	1.35785e-12
AT1G67865	-1.00633	0.0273675
AT1G67900	-2.40209	2.30188e-09
AT1G67910	-2.56889	5.00417e-07
AT1G67970	1.22287	0.000109157	HSFA8
AT1G68050	5.14346	8.55733e-39	FKF1
AT1G68110	-3.74706	8.94085e-06	CLAP
AT1G68190	-3.60395	1.12335e-35	BBX27
AT1G68238	-1.14273	0.00918064
AT1G68390	1.05169	0.0373496
AT1G68470	1.84923	7.13034e-08
AT1G68500	2.79649	5.17938e-12
AT1G68520	-1.55	8.47115e-10	BBX14
AT1G68550	1.14632	1.05265e-09	CRF10
AT1G68560	-1.4047	1.0925e-06	XYL1
AT1G68570	1.04344	0.000256405	NPF3.1
AT1G68840	-3.11278	1.76353e-21	RAV2
AT1G68862	-1.40618	0.000855855
AT1G68872	-1.07176	0.00273985
AT1G69040	-1.68436	3.0035e-10	ACR4
AT1G69310	1.74057	8.80275e-10	WRKY57
AT1G69350	1.54479	6.65059e-05
AT1G69370	-1.04667	7.88708e-05	CM3
AT1G69430	-1.13645	0.0342545
AT1G69480	2.84451	4.60058e-11
AT1G69510	-1.13016	1.49029e-06
AT1G69530	-1.61667	1.09747e-05	EXPA1
AT1G69600	-1.2155	0.0121117	ZFHD1
AT1G69730	1.51085	1.11384e-06
AT1G69850	-1.0595	7.34649e-08	NPF4.6
AT1G69870	3.53001	6.1233e-18	NPF2.13
AT1G69880	1.82055	0.00170931	TH8
AT1G70020	-1.74266	0.00772866
AT1G70080	2.23895	0.00244901	TPS6
AT1G70210	-1.08401	0.000721158	CYCD1;1
AT1G70290	-3.81994	8.1252e-15	TPS8
AT1G70420	1.01699	0.00326442
AT1G70440	1.04119	0.031749	SRO3
AT1G70518	-1.18538	0.00131041
AT1G70610	1.07135	5.77283e-05	ABCB26
AT1G70640	4.51979	2.31186e-05
AT1G70650	1.25724	0.000505087
AT1G70800	2.22068	4.59694e-06	EHB1
AT1G70820	-2.7445	2.20534e-26
AT1G70830	-1.16809	0.00129393	MLP28
AT1G70850	-1.45999	5.14977e-08	MLP34
AT1G70880	-1.02463	0.0150787
AT1G71000	1.56783	0.00222019
AT1G71020	-1.41163	2.71974e-06	PUB10
AT1G71030	-2.37256	8.48806e-07	MYBL2
AT1G71360	1.29082	2.92594e-07	SUN4
AT1G71695	-1.29404	3.16298e-06
AT1G71740	-1.24584	0.00583882
AT1G71850	1.22274	0.000131191
AT1G71970	-2.43531	3.34056e-16
AT1G72150	-1.88522	3.78203e-08	PATL1
AT1G72160	-1.24024	1.12459e-09	PATL3
AT1G72180	-1.01893	7.29344e-10	CEPR2
AT1G72200	-1.46117	0.000166598	ATL11
AT1G72330	1.38282	4.29981e-09	ALAAT2
AT1G72430	-1.51706	0.000447475	SAUR78
AT1G72490	1.2581	0.00658836	DRO1
AT1G72520	1.80882	1.35094e-05	LOX4
AT1G72630	-1.18434	4.11892e-06	ELF4-L2
AT1G72645	-1.46642	1.51624e-06
AT1G72730	1.17997	7.28521e-06
AT1G72820	-2.02679	4.53903e-10
AT1G73010	1.38075	0.0117133	PS2
AT1G73260	-1.90223	0.000429024	KTI1
AT1G73330	-4.33812	3.83377e-36	DR4
AT1G73510	14.2323	4.0383e-06
AT1G73540	-1.28358	9.61679e-06	NUDT21
AT1G73550	-1.16988	0.0298289	LTPG8
AT1G73650	1.518	2.63218e-07
AT1G73700	1.14878	0.016487
AT1G73750	-2.27306	2.78241e-15
AT1G73805	2.18609	7.34955e-05	SARD1
AT1G73810	3.74494	8.40546e-19
AT1G73830	-2.84085	3.74418e-22	BEE3
AT1G73870	1.84357	1.0829e-08	BBX16
AT1G73920	-1.21346	1.144e-05
AT1G73990	1.12318	8.73205e-08	SPPA
AT1G74000	1.02142	0.0125783	SS3
AT1G74010	1.57287	0.000138436
AT1G74670	-6.0398	4.76275e-85	GASA6
AT1G74700	1.53967	8.02224e-07	TRZ1
AT1G74750	1.71031	1.95841e-09
AT1G74810	2.36516	6.53575e-06	BOR5
AT1G74870	1.63831	0.00162954
AT1G74930	-3.19247	5.61691e-07	ORA47
AT1G75040	2.76483	3.12003e-13	PR5
AT1G75170	1.20193	1.394e-05
AT1G75200	1.38734	7.34102e-10
AT1G75220	-1.28756	1.65801e-06	ERDL6
AT1G75360	-1.41686	0.000611278
AT1G75380	-3.00632	3.62252e-16	BBD1
AT1G75460	-1.60922	6.67939e-18
AT1G75490	-3.41565	3.7723e-06
AT1G75750	1.77381	6.84685e-11	GASA1
AT1G75900	1.36849	0.00192444
AT1G75960	-1.57632	0.000888258
AT1G76080	-1.95426	2.04347e-22	CDSP32
AT1G76100	-2.17314	4.12674e-10	PETE1
AT1G76130	1.06379	0.000498257	AMY2
AT1G76410	-1.66209	0.00041187	ATL8
AT1G76420	1.68058	0.00629632	CUC3
AT1G76560	-1.47415	4.91788e-07	CP12-3
AT1G76590	1.25883	2.01267e-07	PLATZ2
AT1G76610	-1.07251	0.0184929
AT1G76870	-1.06239	0.0246593
AT1G76930	1.21478	0.00138457	EXT4
AT1G76980	1.11542	1.78872e-05
AT1G77010	1.17309	0.00828244
AT1G77030	1.3407	1.34898e-10	RH29
AT1G77120	5.47906	9.24264e-61	ADH1
AT1G77210	-2.22029	3.48366e-08	STP14
AT1G77280	1.10492	0.000251323
AT1G77700	-1.56075	0.00348253	UFM1
AT1G77960	-1.51829	0.00722812
AT1G78070	2.42749	3.25481e-13
AT1G78100	1.11315	4.87822e-05	AUF1
AT1G78110	-1.08635	0.00149608
AT1G78460	-1.34123	2.02889e-09	CHBP3
AT1G78490	-1.24926	0.000248495	CYP708A3
AT1G78510	2.50859	9.8229e-19	SPS1
AT1G78570	1.6953	3.89698e-09	RHM1
AT1G78830	-1.60905	4.49132e-09
AT1G78860	1.03791	0.0294671	GAL2
AT1G79110	2.05347	6.29387e-07	BRG2
AT1G79120	1.25723	0.00502093
AT1G79150	1.24667	1.93544e-05	NOC3
AT1G79270	1.84431	9.2934e-10	ECT8
AT1G79360	-1.17536	0.012982	OCT2
AT1G79410	1.16365	0.000754828	OCT5
AT1G79440	1.24112	8.55252e-07	ALDH5F1
AT1G79460	-1.54468	3.16559e-06	GA2
AT1G79470	1.17455	8.28454e-05
AT1G79700	-1.34468	0.00415489	WRI4
AT1G79760	-1.02528	0.0174935	DTA4
AT1G79790	-1.45124	8.54776e-08	FHY1
AT1G79930	1.07245	1.12964e-12	HSP91
AT1G80120	1.57474	0.000140102
AT1G80130	4.77316	1.27965e-49
AT1G80180	-2.35919	2.26503e-11	MASS1
AT1G80270	1.08595	0.000667976	PPR596
AT1G80340	1.98441	5.46863e-05	GA3OX2
AT1G80420	-1.54327	1.69726e-05	ATXRCC1
AT1G80440	-5.22644	3.96216e-10	KMD1
AT1G80460	-1.20269	1.02467e-06	NHO1
AT1G80630	-1.66611	3.62926e-06
AT1G80650	-1.80553	1.91575e-10	RTL1
AT1G80710	1.08276	0.00291321	DRS1
AT1G80750	1.52825	9.22748e-10	RPL7A
AT1G80840	-1.58171	0.00106553	WRKY40
AT1G80920	-4.73645	2.29362e-17	J8
AT1TE45135	23.9138	5.58757e-13
AT1TE59005	1.03106	0.0400951
AT1TE63790	1.25381	0.0245347
AT1TE71765	2.25499	0.00107995
AT1TE71770	1.73186	0.00325281
AT1TE71775	1.67431	0.0001211
AT1TE85165	2.91452	0.00152374
AT2G00340	-2.29137	0.00158853
AT2G00600	-2.68204	0.00178395
AT2G00870	-1.0947	0.0210989
AT2G01340	-2.55642	2.6898e-09	At17.1
AT2G01420	-1.05408	3.87472e-05	PIN4
AT2G01450	-1.17801	1.23712e-05	MPK17
AT2G01520	-2.45936	2.14753e-11	MLP328
AT2G01530	-3.09927	1.87822e-09	MLP329
AT2G01918	-1.30642	0.000240382	PQL3
AT2G01940	-1.30367	1.2839e-05	SGR5
AT2G02000	1.3753	0.0198021	GAD3
AT2G02010	2.63452	1.39903e-07	GAD4
AT2G02061	1.15075	0.0170324
AT2G02100	1.56853	2.15228e-13	LCR69
AT2G02120	2.85866	1.34351e-09	PDF2.1
AT2G02350	-1.11633	0.00935244	SKIP3
AT2G02360	-1.46027	2.05437e-06	PP2-B10
AT2G02710	-2.06601	1.92837e-10	PLPB
AT2G02740	1.04072	0.00530497	WHY3
AT2G02850	1.51495	1.83658e-05	ARPN
AT2G03310	-3.14392	2.62789e-25
AT2G03440	-1.66694	1.42564e-12	NRP1
AT2G03530	-1.46447	5.10676e-11	UPS2
AT2G03750	-1.55205	1.84778e-05
AT2G03760	1.38786	0.000106766	SOT12
AT2G04040	3.08805	1.38411e-15	DTX1
AT2G04050	6.02889	7.73808e-10
AT2G04070	2.67139	0.000886475
AT2G04230	-1.08473	0.000155011
AT2G04240	-1.46225	2.33495e-05	XERICO
AT2G04350	1.18108	1.06675e-05	LACS8
AT2G04430	1.0202	9.63131e-05	NUDT5
AT2G04450	2.40676	2.13663e-05	NUDT6
AT2G04530	1.6713	4.95282e-09	CPZ
AT2G04690	-1.8635	1.95832e-09
AT2G04965	1.28072	0.00150919
AT2G05070	-1.94511	7.43726e-11	LHCB2.2
AT2G05100	-1.00731	1.37143e-06	LHCB2.1
AT2G05160	-2.37749	0.000277947
AT2G05185	-1.00865	0.0136638
AT2G05530	1.22038	0.0223785
AT2G05540	-3.49211	1.33839e-10
AT2G06520	-1.06662	5.07276e-11	PSBX
AT2G07050	-1.1823	1.03743e-10	CAS1
AT2G08650	1.54024	0.00932309
AT2G11880	-1.03829	0.00304296
AT2G12190	1.06054	0.00303434
AT2G13600	1.03424	0.000798078	SLO2
AT2G14080	-1.70222	1.02409e-17
AT2G14100	-1.25026	0.00100037	CYP705A13
AT2G14160	-1.37276	0.0195278
AT2G14520	-1.37306	0.00636396
AT2G14560	4.20077	5.83378e-05	LURP1
AT2G14660	1.03046	0.0196625
AT2G14878	-1.66578	4.31755e-11
AT2G15020	1.91569	1.77343e-09
AT2G15080	-1.39846	0.000561977	RLP19
AT2G15090	-1.11344	8.66877e-05	KCS8
AT2G15128	1.87925	3.17455e-05
AT2G15310	1.02584	0.000639074	ARFB1A
AT2G15320	1.10463	1.26656e-09
AT2G15790	1.10912	1.89746e-08	SQN
AT2G15880	-2.79815	2.20206e-07	LRX10
AT2G15890	-1.87371	3.22459e-09	MEE14
AT2G15960	-3.65595	9.0795e-14
AT2G15970	1.28916	2.8231e-06	COR413-PM1
AT2G16005	-2.199	0.000289324	ROSY1
AT2G16500	1.33901	1.05629e-05	ADC1
AT2G16890	4.08206	2.36432e-27
AT2G17250	1.1965	5.58354e-06	EMB2762
AT2G17270	1.68256	1.00092e-08	PHT3;3
AT2G17280	2.42583	1.6765e-21
AT2G17430	-1.15719	0.00272298	MLO7
AT2G17450	-1.91958	6.17847e-14	RHA3A
AT2G17580	1.00052	1.40743e-05	AGS1
AT2G17730	1.2655	5.61293e-07	NIP2
AT2G17740	-1.12238	0.0286151	VLG
AT2G17780	-1.47071	2.50207e-06	MCA2
AT2G17787	-1.02054	0.00134963
AT2G17840	1.4881	7.91091e-13	ERD7
AT2G17880	-4.24809	1.62874e-05	DJC24
AT2G18050	-2.58712	1.53536e-11	HIS1-3
AT2G18120	1.12891	0.00771522	SRS4
AT2G18220	1.10219	1.12896e-05	NOC2
AT2G18260	-1.22135	0.00218461	SYP112
AT2G18280	-1.15598	2.33226e-06	TLP2
AT2G18300	-2.42323	3.76477e-16	HBI1
AT2G18330	1.14975	0.000141107	SBA3
AT2G18520	1.54531	5.09813e-05
AT2G18560	-2.16505	1.01049e-20
AT2G18670	-2.14101	1.96442e-12	ATL56
AT2G18700	-2.59141	5.10233e-09	TPS11
AT2G18740	1.1073	2.10622e-08	PCP
AT2G18900	1.37743	1.52866e-05
AT2G19310	-1.25516	0.00152851	HSP18.5
AT2G19385	1.56085	3.50972e-08
AT2G19450	1.7866	3.76982e-10	TAG1
AT2G19490	1.35172	0.000147683	RECA2
AT2G19530	1.34888	0.000541487
AT2G19640	1.3363	5.81348e-06	ASHR2
AT2G19650	1.28333	0.000395049
AT2G19660	-1.3454	0.00986387
AT2G19800	-2.58992	3.10988e-08	MIOX2
AT2G19910	-1.08741	0.00391642
AT2G19930	-1.20022	1.20876e-06
AT2G20142	1.74871	7.04657e-07
AT2G20180	-1.7512	3.54558e-07	PIL5
AT2G20250	-1.82045	4.45555e-05
AT2G20260	-1.32996	3.37422e-10	PSAE-2
AT2G20530	1.14449	6.22249e-11	PHB6
AT2G20550	-1.88044	1.34502e-05
AT2G20670	-4.54153	1.13803e-15
AT2G20800	5.59125	2.91281e-08	NDB4
AT2G20835	-1.39855	0.0100214
AT2G21100	1.01713	0.0332119
AT2G21130	1.29693	0.000979773
AT2G21210	-2.24634	8.72943e-09	SAUR6
AT2G21320	3.93277	3.53154e-12	BBX18
AT2G21350	3.21722	8.43902e-09
AT2G21540	-1.72499	4.73924e-10	SFH3
AT2G21590	1.06046	0.000174362	APL4
AT2G21620	1.4614	1.06323e-14	RD2
AT2G21640	2.18681	1.73215e-05
AT2G21660	1.1785	0.00181104	CCR2
AT2G22070	1.29404	0.000743559
AT2G22080	1.13384	8.05612e-09
AT2G22090	-1.28671	1.12303e-05	UBA1A
AT2G22122	-1.63133	9.31625e-12
AT2G22500	1.36994	0.000727414	UCP5
AT2G22590	6.15835	1.5417e-25
AT2G22660	-1.06554	0.000254088	ATGRDP1
AT2G22680	-1.09429	0.0016792	WAVH1
AT2G22690	-1.01157	0.00251813
AT2G22730	-1.15193	0.00158853
AT2G22770	-1.58166	1.10516e-05	NAI1
AT2G22830	-1.5838	5.1657e-08	SQE2
AT2G22860	-1.62385	7.79553e-05	PSK2
AT2G22890	-1.23	0.000932529
AT2G22980	-2.36153	7.21159e-16	SCPL13
AT2G22990	-2.02127	4.89688e-22	SNG1
AT2G23040	1.59115	3.68694e-05
AT2G23120	1.53469	5.99287e-16
AT2G23130	-1.05229	0.00572214	AGP17
AT2G23170	-1.75832	0.00139471	GH3.3
AT2G23290	-1.49327	0.000138436	MYB70
AT2G23420	1.11335	2.20617e-06	NAPRT2
AT2G23840	-1.18405	8.99412e-14
AT2G23910	5.86812	2.9246e-28
AT2G24010	-1.13917	0.0331563	scpl23
AT2G24050	1.0832	0.000394821	eIFiso4G2
AT2G24150	-1.03764	0.00152248	HHP3
AT2G24240	-1.46206	1.14161e-06
AT2G24550	-2.59766	1.14999e-08
AT2G24560	4.62887	4.56906e-05
AT2G24755	-1.03088	0.00676455
AT2G24800	1.52793	0.0128008
AT2G25080	-1.4491	2.58381e-09	GPX1
AT2G25090	-1.10077	0.00742557	CIPK16
AT2G25180	-1.24031	8.05625e-09	RR12
AT2G25200	-4.52235	4.75999e-15
AT2G25297	1.08414	0.0367646
AT2G25510	2.21277	4.87648e-07
AT2G25530	2.7672	3.17538e-11
AT2G25590	-1.60653	1.86945e-05
AT2G25605	-1.70318	3.74437e-14
AT2G25620	1.76001	4.89269e-08	DBP1
AT2G25625	1.38437	0.00309655	CV
AT2G25735	-1.73836	0.000510399
AT2G25770	-1.36118	0.00613781
AT2G25780	-2.5589	4.99463e-05
AT2G25900	-4.61747	6.67486e-25	ATCTH
AT2G26070	-1.14023	0.000860152	RTE1
AT2G26110	-1.14629	7.56998e-06
AT2G26215	-2.35275	5.19433e-07
AT2G26260	-1.01958	0.00193792	3BETAHSD/D2
AT2G26515	-1.32801	0.0166474
AT2G26695	-1.59143	0.000752274
AT2G26710	-2.0067	2.20393e-07	BAS1
AT2G26980	-1.53949	1.5095e-05	CIPK3
AT2G27010	-1.02477	0.0130318	CYP705A9
AT2G27050	-1.4112	1.84208e-08	EIL1
AT2G27310	-1.06813	0.00221414
AT2G27370	-1.70847	0.000349031	CASP3
AT2G27385	-1.48164	5.33129e-05
AT2G27420	1.40858	0.0141348
AT2G27470	1.08129	0.000272145	NF-YB11
AT2G27610	1.45367	0.00464677
AT2G27775	1.17964	0.000150068
AT2G27830	-1.95427	2.302e-07
AT2G27840	1.22299	1.94428e-05	HDT4
AT2G28120	-1.3132	0.000101002	OTU1
AT2G28500	1.14768	0.0268726	LBD11
AT2G28550	1.12206	7.73629e-05	RAP2.7
AT2G28560	1.2422	0.000809701	RAD51B
AT2G28630	-3.67679	3.01915e-32	KCS12
AT2G28900	2.10793	5.3207e-11	OEP16-1
AT2G29090	1.1805	0.000591902	CYP707A2
AT2G29125	-1.17138	0.017711	RTFL2
AT2G29260	1.66864	0.000111464
AT2G29290	-2.53548	8.53916e-27	DEG14
AT2G29300	-6.2027	1.60772e-23
AT2G29310	-2.51359	3.89636e-09
AT2G29460	2.20501	2.54214e-06	GSTU4
AT2G29500	-1.36117	0.000233098	HSP17.6B
AT2G29630	1.03156	0.000529037	THIC
AT2G29670	-1.98733	6.63026e-08
AT2G29750	-2.88938	1.23147e-07	UGT71C1
AT2G29760	1.7489	3.28685e-08	OTP81
AT2G30140	1.11553	7.95833e-05	UGT87A2
AT2G30150	1.00797	8.23769e-05
AT2G30230	-1.95798	1.03784e-06
AT2G30420	-1.68848	0.000318498	ETC2
AT2G30480	-2.03723	6.06837e-10
AT2G30520	-1.45446	8.7809e-13	RPT2
AT2G30570	-1.41795	9.50539e-19	PSBW
AT2G30600	-1.77396	1.52661e-05
AT2G30766	2.1001	0.00367328	FEP1
AT2G30790	-1.9256	0.000163904	PSBP-2
AT2G30900	1.22601	0.026871	TBL43
AT2G31060	1.26947	4.30685e-06	EMB2785
AT2G31110	-1.48302	1.05835e-05
AT2G31360	1.14989	0.000205482	ADS2
AT2G31380	2.24088	2.31799e-14	STH
AT2G31585	-1.14287	0.0010868
AT2G32090	-1.33702	1.15989e-09	GLXI-LIKE;9
AT2G32100	-2.69024	1.64847e-09	OFP16
AT2G32150	-3.42	7.55169e-14
AT2G32190	1.63012	0.00136807	ATHCYSTM4
AT2G32210	2.11749	0.000162841	ATHCYSTM6
AT2G32290	-1.79756	0.00229781	BAM6
AT2G32550	-2.55747	5.59939e-05	NOT9C
AT2G32560	-1.10982	0.000945078
AT2G32800	-1.87875	2.26188e-13	LECRK-S.2
AT2G32870	-3.25039	1.11245e-07
AT2G32880	-3.26838	1.71709e-24
AT2G32960	1.32431	0.00123953	PFA-DSP2
AT2G33210	1.54362	3.16559e-06	HSP60-2
AT2G33680	1.07948	0.000103152	RID4
AT2G33750	-1.59713	0.00501722	PUP2
AT2G33760	1.01664	0.00895233
AT2G33790	-1.34039	0.0102878	AGP30
AT2G33830	-1.43229	0.000555176	DRM2
AT2G33847	1.43764	0.0025633
AT2G34000	-1.45608	0.0160442	ATL99
AT2G34070	1.19037	0.000240111	TBL37
AT2G34170	-1.52795	3.05465e-08	DEG21
AT2G34180	-1.22133	0.0107059	CIPK13
AT2G34220	1.08919	0.0298308	MEE20
AT2G34240	1.73008	0.000208583
AT2G34357	1.01353	0.000254291
AT2G34430	-3.4215	2.80064e-30	LHB1B1
AT2G34500	-2.93285	1.52011e-06	CYP710A1
AT2G34560	-1.02044	9.72569e-05	CCP1
AT2G34570	1.52763	1.91368e-08	MEE21
AT2G34620	-3.49048	3.25733e-19	MTERF10
AT2G34720	1.28308	1.13295e-11	NF-YA4
AT2G34850	1.56914	0.000520246	MEE25
AT2G34960	1.66698	0.000120271	CAT5
AT2G35030	1.18839	9.62859e-05	COD1
AT2G35190	-1.13316	3.07742e-06	NPSN11
AT2G35470	-1.03525	1.94002e-05
AT2G35480	1.06611	0.000506914
AT2G35660	1.19327	0.000153538	CTF2A
AT2G35700	1.79024	2.37742e-05	ERF38
AT2G35770	1.06186	0.0179119	scpl28
AT2G35790	1.20335	5.6229e-06
AT2G35820	-1.20373	4.86852e-08
AT2G35940	1.09773	1.17548e-08	BLH1
AT2G35960	1.6659	3.03552e-05	NHL12
AT2G36010	1.09478	0.0013637	E2F3
AT2G36050	-3.53345	3.42102e-29	OFP15
AT2G36120	-2.52755	2.89886e-08	DOT1
AT2G36270	1.44218	7.00636e-07	ABI5
AT2G36320	-1.40833	6.26305e-05
AT2G36390	1.51423	1.51512e-08	SBE2.1
AT2G36530	1.08743	3.49733e-08	LOS2
AT2G36580	1.10793	9.23891e-07
AT2G36590	1.68195	0.000204199	ProT3
AT2G36630	1.51702	5.70163e-07
AT2G36750	4.07434	1.40173e-13	UGT73C1
AT2G36770	-1.16176	0.0285654
AT2G36800	2.9206	3.26159e-14	DOGT1
AT2G36830	-2.31708	3.77218e-11	GAMMA-TIP
AT2G36870	1.02227	0.00622934	XTH32
AT2G36900	-1.30596	0.00012046	MEMB11
AT2G36950	-1.15471	2.2982e-05	ATHMP20
AT2G36970	2.58034	4.93186e-09
AT2G37020	1.05795	1.21292e-05
AT2G37040	1.9619	8.24121e-08	pal1
AT2G37130	-1.55173	0.000255553
AT2G37170	-1.78453	1.97839e-07	PIP2B
AT2G37310	1.21173	0.00180534
AT2G37340	-1.05622	1.7021e-05	RS2Z33
AT2G37480	-1.0497	4.0493e-07
AT2G37580	1.31492	0.00120856	ATL33
AT2G37678	-1.70217	2.59572e-07	FHY1
AT2G37690	1.32233	1.65659e-05
AT2G37710	1.2052	0.000659422	LECRK-IV.1
AT2G37750	-1.64837	0.000273407
AT2G37770	4.59338	9.19902e-12	ChlAKR
AT2G37790	-1.19462	0.00471045	AKR4C10
AT2G37890	1.43318	3.32956e-06
AT2G37920	-1.45402	1.71525e-10	emb1513
AT2G37950	-2.10897	4.45917e-06
AT2G37970	1.80992	1.42407e-11	SOUL-1
AT2G38050	-1.18953	2.355e-05	DET2
AT2G38120	-1.40768	5.96193e-07	AUX1
AT2G38210	1.85761	2.97549e-11	PDX1L4
AT2G38290	1.30283	2.97993e-08	AMT2
AT2G38390	1.03729	0.0172984
AT2G38400	-1.14458	0.00390354	AGT3
AT2G38465	2.1408	6.40417e-10
AT2G38820	-2.31372	1.82159e-09
AT2G38940	1.07136	0.0104017	PHT1;4
AT2G39170	1.0912	1.23147e-07
AT2G39310	-2.25101	1.23972e-18	JAL22
AT2G39400	-1.80026	1.58112e-08	MAGL6
AT2G39510	1.2334	0.00102924	UMAMIT14
AT2G39570	-2.4273	5.02297e-08	ACR9
AT2G39710	2.34644	3.57508e-11
AT2G39850	-1.19374	0.00689871
AT2G39870	-1.0693	0.000148564
AT2G39930	-1.42249	5.04587e-11	ISA1
AT2G40000	-2.46918	1.2926e-06	HSPRO2
AT2G40010	1.0459	0.00178953
AT2G40020	-1.61827	6.00337e-08
AT2G40030	-1.14732	3.75282e-07	NRPD1B
AT2G40080	4.68845	5.54722e-25	ELF4
AT2G40085	1.0573	0.0173414
AT2G40110	-1.05617	0.00254419
AT2G40130	1.58621	0.0003839	SMXL8
AT2G40150	1.13168	0.00111044	TBL28
AT2G40340	2.59558	4.68328e-08	DREB2C
AT2G40350	2.09417	0.00515893
AT2G40400	1.14422	0.000239363	BPG3
AT2G40420	-1.26012	0.000625971
AT2G40610	-4.05558	3.23703e-28	EXPA8
AT2G40640	-1.16716	0.00199152	PUB62
AT2G40670	-1.05279	0.0134182	RR16
AT2G40970	-1.41661	0.000158705	MYBC1
AT2G41000	1.30512	3.16298e-06
AT2G41040	1.48719	1.66854e-05
AT2G41070	-1.27354	0.00240593	EEL
AT2G41090	1.53831	2.56827e-06	CML10
AT2G41312	-1.34521	0.00146803	SORF13
AT2G41430	-1.70547	9.3521e-13	ERD15
AT2G41480	-2.65073	3.14064e-06	PRX25
AT2G41730	1.28356	0.00415489
AT2G41870	-2.01682	3.27741e-09	REM4.2
AT2G42150	3.13869	1.90288e-09
AT2G42170	-2.01851	1.75974e-05
AT2G42220	-1.28889	5.13794e-07
AT2G42320	-1.46253	2.88124e-12
AT2G42380	-2.30102	5.48351e-10	BZIP34
AT2G42530	4.53069	1.11384e-06	COR15B
AT2G42540	5.42207	2.27095e-10	COR15A
AT2G42730	-1.07856	0.00322169
AT2G42850	-1.3925	0.0141942	CYP718
AT2G42870	-3.71783	1.52641e-07	PAR1
AT2G42900	-1.89079	1.769e-06
AT2G43010	-3.14991	1.06033e-18	PIF4
AT2G43050	-2.07968	1.59291e-05	ATPMEPCRD
AT2G43140	1.08222	0.00128703	BHLH129
AT2G43440	2.65823	0.000145107
AT2G43560	-1.09393	3.22033e-07
AT2G43690	-1.72385	0.000325903	LECRK-V.3
AT2G43780	1.24704	1.4394e-06
AT2G43820	-1.06673	0.00133592	UGT74F2
AT2G44080	-1.70158	0.000134617	ARL
AT2G44380	-1.94926	1.234e-07
AT2G44500	-1.04265	0.000244922
AT2G44510	1.29597	1.67546e-05
AT2G44735	-1.53033	0.00201228
AT2G44740	-3.47385	4.55098e-09	CYCP4;1
AT2G44940	2.14528	3.33002e-07	ERF34
AT2G45080	1.14255	0.00303208	cycp3;1
AT2G45170	-1.90878	2.48152e-09	ATG8E
AT2G45380	-1.08751	0.000367922
AT2G45510	-1.18628	0.00317382	CYP704A2
AT2G45760	1.4782	0.0151747	BAP2
AT2G45920	-1.02383	0.00633842
AT2G46030	-1.16161	2.87838e-08	UBC6
AT2G46220	-1.34492	1.96565e-08
AT2G46330	-2.42665	5.03463e-12	AGP16
AT2G46400	2.09875	1.83268e-05	WRKY46
AT2G46420	1.0424	0.000352023
AT2G46440	2.35588	9.44594e-14	CNGC11
AT2G46450	1.52118	1.34814e-05	CNGC12
AT2G46490	-1.91978	2.72058e-13
AT2G46550	-2.162	1.47116e-17
AT2G46710	-1.26405	1.83343e-08	ROPGAP3
AT2G46790	2.19083	5.66696e-27	PRR9
AT2G46820	-1.05287	4.51879e-10	PSI-P
AT2G46830	3.43817	2.42735e-58	CCA1
AT2G46940	2.1893	1.52126e-06
AT2G47010	1.28558	0.00206193
AT2G47130	-1.26908	0.000261505	SDR3
AT2G47150	1.49059	0.0137327
AT2G47180	1.19605	0.00187289	GolS1
AT2G47370	1.35678	1.05629e-05
AT2G47440	-1.0567	0.00104261
AT2G47460	3.65116	1.2624e-10	MYB12
AT2G47490	1.29903	5.59411e-09	NDT1
AT2G47520	1.50681	0.0149659	ERF71
AT2G47560	-2.47133	3.24833e-05	ATL64
AT2G47800	1.18488	9.73059e-05	ABCC4
AT2G47890	1.30694	8.31452e-05	BBX11
AT2G47930	-1.43019	0.00199163	AGP26
AT2G47990	1.47559	6.93878e-06	SWA1
AT2G48080	1.47823	0.00662828	ALKBH10A
AT2TE06390	5.45804	2.18406e-05
AT2TE26845	1.73768	0.000254051
AT2TE26850	1.23779	0.00646346
AT2TE71050	-1.05156	0.0380265
AT3G00190	-2.16079	0.00461395
AT3G00210	-1.23119	0.000181734
AT3G00580	-1.5106	0.0137852
AT3G00810	-1.23701	0.026738
AT3G00840	-1.12454	0.0284146
AT3G01175	-1.56825	0.00719213
AT3G01310	-1.08553	1.20954e-07	ATVIP1
AT3G01375	2.4453	0.000782641
AT3G01420	-1.02781	0.0170245	DOX1
AT3G01490	-1.65261	7.34744e-10	CBC1
AT3G01500	-1.24707	0.00146225	CA1
AT3G01513	-1.01789	0.0228348
AT3G01600	1.13413	0.0206803	NAC044
AT3G01680	-1.10325	3.46262e-06	SEOR1
AT3G01690	-1.33937	4.57433e-13
AT3G01770	-1.05765	0.000477653	BET10
AT3G01795	1.01533	0.00500726
AT3G01800	1.33905	3.07929e-05
AT3G01820	1.67193	8.02431e-10
AT3G01830	3.50614	3.83441e-05
AT3G02170	-2.57963	5.18151e-10	LNG2
AT3G02180	-1.87756	5.58415e-22	SP1L3
AT3G02230	1.17582	1.15313e-05	RGP1
AT3G02340	-1.47542	4.79255e-06
AT3G02610	1.11109	0.0149531	AAD2
AT3G02700	-1.36751	1.4476e-07
AT3G02990	1.28038	3.35402e-06	HSFA1E
AT3G03000	-1.19584	0.000766039
AT3G03060	1.82335	7.94835e-06	SBA1
AT3G03150	-1.11651	0.000277465
AT3G03265	-4.75692	7.24019e-15
AT3G03440	2.11199	1.04946e-12
AT3G03530	1.96429	0.0025473	NPC4
AT3G03535	3.10436	0.000888096
AT3G03820	-2.66319	8.38591e-05	SAUR29
AT3G03830	-1.53003	0.013407	SAUR28
AT3G03840	-1.66904	0.00253011	SAUR27
AT3G03850	-1.87717	0.0035043	SAUR26
AT3G03870	-1.61975	1.79583e-05
AT3G03960	1.04142	5.06238e-06	CCT8
AT3G04020	1.69869	2.12102e-07
AT3G04140	2.16002	3.36737e-09
AT3G04360	-1.05769	0.041886
AT3G04550	1.02227	0.00722505	RAF1
AT3G04620	1.63218	4.69004e-07	DAN1
AT3G04730	-1.56118	4.55098e-09	IAA16
AT3G04960	-1.69626	0.00485142
AT3G05060	1.30914	2.68565e-07
AT3G05140	-1.50211	0.00159676	RBK2
AT3G05150	-1.86401	0.00113948
AT3G05160	-1.09468	0.00217009
AT3G05327	1.16108	0.00688028
AT3G05500	1.18313	6.05741e-11	LDAP3
AT3G05650	1.04139	0.0177726	RLP32
AT3G05660	3.29766	9.5807e-08	RLP33
AT3G05800	2.393	4.17939e-07	AIF1
AT3G05980	1.09018	0.00819676
AT3G06035	1.60907	4.47187e-06
AT3G06070	-2.53862	5.85944e-05
AT3G06080	-1.31675	5.43395e-05	TBL10
AT3G06140	-1.8062	7.53003e-10	LUL4
AT3G06330	-1.57376	6.16541e-14
AT3G06355	-1.19495	0.00157823
AT3G06410	1.21841	1.84189e-07
AT3G06455	-1.17076	0.00199617
AT3G06530	1.16252	5.46863e-05
AT3G06590	-1.05125	7.8386e-05	AIF2
AT3G06655	-2.82819	0.00127361
AT3G06750	-2.18693	5.27993e-16
AT3G06850	-1.69457	0.000296243	BCE2
AT3G06890	1.6075	0.000233297
AT3G07010	-1.63329	1.88199e-11
AT3G07050	1.47569	2.17047e-08	NSN1
AT3G07195	1.12343	0.000288937
AT3G07215	-1.27262	0.000213684
AT3G07310	-2.29446	8.6493e-16
AT3G07350	-3.58454	6.62755e-13
AT3G07540	-1.20252	4.98746e-07	FH10
AT3G07650	2.46198	1.40107e-14	COL9
AT3G07700	1.07678	0.000200319	SIA1
AT3G07720	1.59173	2.29265e-08
AT3G07750	1.09096	0.000140141	RRP42
AT3G08040	1.38074	5.6229e-06	FRD3
AT3G08505	1.00269	0.000616691
AT3G08640	1.53278	1.70698e-24	RER3
AT3G08700	1.22618	0.0193652	UBC12
AT3G08730	1.25589	1.55677e-10	PK1
AT3G08800	-1.18736	0.000636588	SIEL
AT3G08820	1.53283	5.75212e-05
AT3G08940	-2.42309	6.60069e-21	LHCB4.2
AT3G08950	1.32533	4.84113e-07	HCC1
AT3G09060	1.05638	0.00035487
AT3G09160	-1.42897	4.62377e-05
AT3G09450	4.85227	4.08769e-32
AT3G09520	1.89449	4.55246e-05	EXO70H4
AT3G09590	4.62857	6.08991e-07
AT3G09595	4.24616	1.53948e-05
AT3G09600	2.35848	3.62043e-16	RVE8
AT3G09650	1.34234	2.11353e-05	HCF152
AT3G09720	1.00037	0.000123704	RH57
AT3G10020	-3.13096	8.00106e-16	HUP26
AT3G10070	1.01711	6.04818e-05	TAF12
AT3G10110	1.70576	4.52088e-05	MEE67
AT3G10200	-1.35012	0.00295131
AT3G10250	-1.39855	2.43151e-07
AT3G10405	-1.17333	1.31525e-06
AT3G10410	1.62507	1.00726e-13	scpl49
AT3G10530	1.74995	1.93814e-06
AT3G10690	1.61256	1.76385e-09	GYRA
AT3G10740	-2.16275	1.05771e-13	ASD1
AT3G10985	-2.07685	2.59315e-08	SAG20
AT3G11020	1.00543	0.0191262	DREB2B
AT3G11050	1.72318	5.25252e-05	FER2
AT3G11090	-1.21885	0.00106797	LBD21
AT3G11100	-1.34414	4.50758e-06	VFP3
AT3G11220	1.03375	5.00843e-07	ELO1
AT3G11460	1.20091	0.00027497	MEF10
AT3G11550	-1.26082	0.00351209	CASP2
AT3G11580	1.53851	7.27696e-07	NGAL2
AT3G11690	-2.45374	3.18419e-11
AT3G11750	-1.69101	0.000192394	FOLB1
AT3G11964	1.04607	1.39256e-05	RRP5
AT3G12120	-1.02581	4.74724e-07	FAD2
AT3G12150	-2.07871	4.82176e-11
AT3G12270	1.37621	4.66406e-06	PRMT3
AT3G12320	1.51222	1.54917e-14	LNK3
AT3G12340	1.20976	2.74711e-06
AT3G12610	-1.09012	0.0012409	DRT100
AT3G12710	-1.56263	6.2804e-07
AT3G12860	1.35977	1.77283e-05
AT3G12900	1.5351	0.0050261	S8H
AT3G13065	-1.76133	3.35948e-05	SRF4
AT3G13080	1.40494	1.99327e-07	ABCC3
AT3G13090	2.01506	4.62611e-06	ABCC6
AT3G13100	1.15429	0.00274334	ABCC7
AT3G13130	1.06617	0.040688
AT3G13150	1.56613	3.26508e-07
AT3G13160	1.33839	1.40929e-07	RPPR3B
AT3G13210	1.07318	0.0091759
AT3G13276	-1.90703	0.00705818
AT3G13277	-2.91584	5.60044e-08
AT3G13330	1.32691	6.68193e-16	PA200
AT3G13420	1.11852	0.000798155
AT3G13432	1.06545	0.0332617
AT3G13750	-2.80475	6.46667e-10	BGAL1
AT3G13782	-1.25064	0.00120449	NAP1;4
AT3G13784	4.49166	1.66871e-11	CWINV5
AT3G13940	1.01182	0.000598436
AT3G13980	-1.08174	0.000830011	BG4
AT3G14150	-1.18771	3.34836e-07	HAOX2
AT3G14200	1.11042	0.000459341
AT3G14580	1.53973	0.000349622
AT3G14690	1.22052	8.51268e-06	CYP72A15
AT3G14760	-1.0157	0.0043029
AT3G14780	-1.10722	0.0247547
AT3G14890	1.60183	5.10395e-12	ZDP
AT3G14900	1.30868	0.00311333	EMB3120
AT3G14930	-1.46343	3.81334e-08	HEME1
AT3G14940	1.01792	0.00817657	PPC3
AT3G15080	1.37881	3.01262e-05
AT3G15090	1.10241	3.76064e-07
AT3G15140	1.69009	1.17347e-07	ERI-1
AT3G15352	1.20172	8.29956e-05	COX17
AT3G15353	-1.01143	1.73122e-06	MT3
AT3G15354	1.47467	1.76057e-07	SPA3
AT3G15358	-1.62007	5.22463e-05
AT3G15450	-3.88661	6.26693e-12
AT3G15460	2.03045	3.73299e-06	ATBRX1-1
AT3G15510	-1.07001	0.00141516	NAC2
AT3G15540	-1.06405	0.0279094	IAA19
AT3G15570	-1.38363	0.00542351
AT3G15630	-2.80297	2.80857e-10
AT3G15650	2.01967	5.81348e-06
AT3G15760	-1.94263	8.45851e-05
AT3G15770	-2.20622	1.46697e-08
AT3G15950	-1.50618	8.72943e-09	NAI2
AT3G16140	-1.14281	7.00741e-11	PSAH-1
AT3G16175	1.00904	0.0227288
AT3G16230	-1.01479	2.33976e-07
AT3G16240	-3.27237	4.28006e-09	DELTA-TIP
AT3G16400	-1.56706	3.09999e-15	NSP1
AT3G16420	-2.07094	8.69438e-16	PBP1
AT3G16430	-1.03375	0.00230852	JAL31
AT3G16450	-1.9008	1.27592e-06	JAL33
AT3G16460	-2.2187	2.78391e-19	JAL34
AT3G16640	-1.17304	1.71577e-08	TCTP1
AT3G16670	-1.04159	4.11158e-05
AT3G16690	-1.18473	4.26076e-07	SWEET16
AT3G16770	-1.78652	1.11384e-06	EBP
AT3G16810	1.49161	1.04523e-08	PUM24
AT3G17070	-1.10035	7.34636e-05
AT3G17100	-2.2054	1.13705e-16	AIF3
AT3G17130	2.80821	1.6769e-12
AT3G17240	1.11045	6.31901e-10	mtLPD2
AT3G17470	-1.26552	1.24438e-11	CRSH
AT3G17609	3.59525	5.46977e-15	HYH
AT3G17611	1.08979	0.000319847	RBL14
AT3G17790	2.66259	0.000326822	PAP17
AT3G17800	1.83284	3.20951e-07
AT3G17830	1.02264	0.00684736	DJA4
AT3G18010	1.78589	1.76091e-06	WOX1
AT3G18050	-1.90986	1.43948e-13
AT3G18070	-1.54819	0.000157905	BGLU43
AT3G18080	-1.78744	8.39719e-07	BGLU44
AT3G18090	-1.02258	0.00310497	NRPD2B
AT3G18130	1.29823	0.000172801	RACK1C_AT
AT3G18320	-1.85006	2.00269e-07
AT3G18420	1.15717	1.0889e-05	SG1
AT3G18510	1.68275	1.16742e-05
AT3G18600	1.49733	1.45172e-07
AT3G18750	-1.22645	0.000179182	WNK6
AT3G18773	-3.36955	1.69673e-05	ATL77
AT3G18840	1.41326	0.0033284
AT3G18890	-1.38001	2.76233e-07	Tic62
AT3G18980	-1.74785	4.75454e-21	ETP1
AT3G19250	1.0722	0.00371259
AT3G19330	1.14809	0.00298017
AT3G19400	-1.10212	1.02256e-05
AT3G19440	1.5294	2.60833e-06
AT3G19450	1.02669	0.00113948	ATCAD4
AT3G19508	1.21442	0.00170497	SDHAF3
AT3G19800	-1.0578	1.21502e-06	DUF177B
AT3G19820	-1.00503	2.65483e-06	DWF1
AT3G19850	-3.46605	3.13597e-22
AT3G20130	-1.18291	0.000682964	CYP705A22
AT3G20340	-1.26089	0.000337941
AT3G20370	-2.12096	3.00657e-09
AT3G20395	-5.43546	2.01432e-19	ATL92
AT3G20440	1.64415	1.0889e-05	EMB2729
AT3G20680	-1.1412	0.000161802
AT3G20810	1.2694	0.00299562	JMJD5
AT3G20940	-1.6489	0.00299973	CYP705A30
AT3G21055	-1.10706	6.12324e-11	PSBTN
AT3G21080	1.69073	0.000370946
AT3G21150	5.26944	1.0248e-25	BBX32
AT3G21260	-1.17557	1.5362e-05	GLTP3
AT3G21330	-2.36238	0.00100624
AT3G21351	-1.30678	0.000611395
AT3G21390	1.01396	1.35226e-05
AT3G21420	-1.5913	1.21859e-09	LBO1
AT3G21470	1.26419	0.00351883
AT3G21520	-2.10354	0.000177143	DMP1
AT3G21540	1.62556	1.04185e-12
AT3G21560	4.237	7.05302e-24	UGT84A2
AT3G21690	1.85236	1.76523e-09
AT3G21750	1.8521	1.48044e-07	UGT71B1
AT3G21890	2.48486	0.00223346	BBX31
AT3G21950	-1.48921	0.00171411
AT3G22060	-1.2036	0.00208143
AT3G22150	-1.24508	0.000846884	AEF1
AT3G22231	1.04539	0.0422997	PCC1
AT3G22235	1.00315	0.0482153	ATHCYSTM8
AT3G22310	1.59081	5.83323e-08	PMH1
AT3G22370	1.66258	3.08624e-08	AOX1A
AT3G22450	1.5752	5.88793e-05	UL18-L1
AT3G22460	-1.26176	0.00370548	OASA2
AT3G22550	1.58448	0.00116439
AT3G22640	-3.44231	0.00020989	PAP85
AT3G22660	1.43329	5.61293e-07	EBP2
AT3G22830	4.93363	5.81348e-06	HSFA6B
AT3G22840	7.30946	3.49194e-19	ELIP1
AT3G22880	-1.74122	9.08382e-06	DMC1
AT3G22910	2.41213	6.54756e-09	ACA13
AT3G22930	1.46933	0.000180358	CML11
AT3G22961	-1.24439	0.0122533
AT3G23000	1.18858	7.9612e-08	CIPK7
AT3G23030	-1.34513	0.000928913	IAA2
AT3G23080	-2.27563	4.00553e-26
AT3G23170	1.84208	4.74143e-07	PRP
AT3G23210	1.72771	4.80093e-10	bHLH34
AT3G23250	1.41525	0.0117476	MYB15
AT3G23470	-1.86791	2.43277e-05
AT3G23480	-3.09484	7.25648e-07
AT3G23620	1.49905	1.19019e-08	ARPF2
AT3G23640	-1.31892	1.54442e-05	HGL1
AT3G23800	-2.5332	2.8823e-05	SBP3
AT3G23810	1.47848	0.000280616	SAHH2
AT3G23830	1.00795	5.89195e-05	RBGA4
AT3G23880	-2.87165	1.57959e-15
AT3G23990	1.01797	1.68495e-05	HSP60
AT3G24100	-2.79586	2.10002e-26	BIA
AT3G24170	1.5887	2.74831e-07	GR1
AT3G24190	1.81206	9.37123e-10
AT3G24450	-1.12987	0.0109383	ATHMP27
AT3G24460	1.82215	3.19278e-05
AT3G24500	-1.79435	0.000120177	MBF1C
AT3G24840	1.1006	4.54798e-05
AT3G25010	-1.16121	0.00427216	RLP41
AT3G25013	-1.99676	8.92423e-05
AT3G25190	-1.09543	0.00274334	VTL5
AT3G25670	-1.23925	0.00248762
AT3G25717	-1.45255	1.8309e-08	RTFL16
AT3G25805	-1.00478	0.000146657
AT3G26100	-1.20096	2.11252e-12
AT3G26180	-1.47441	3.13654e-07	CYP71B20
AT3G26220	-2.39057	8.51268e-06	CYP71B3
AT3G26230	-2.41521	0.000295758	CYP71B24
AT3G26240	-1.79404	1.92465e-12
AT3G26280	-2.07367	2.10272e-22	CYP71B4
AT3G26410	1.20949	1.08734e-05	TRM11
AT3G26510	-2.27819	2.76925e-06
AT3G26520	-2.61654	1.0661e-12	TIP2
AT3G26740	-3.45392	3.80539e-28	CCL
AT3G26782	1.42444	2.89139e-07
AT3G26820	1.19081	0.0198278	ELT3
AT3G26840	1.2443	0.0012089	PES2
AT3G26890	-1.09931	3.44408e-05
AT3G26932	-1.14151	0.000111464	DRB3
AT3G27020	-1.33042	1.63996e-06	YSL6
AT3G27170	1.80527	8.37211e-07	CLC-B
AT3G27210	1.04849	0.000568548
AT3G27250	1.03082	0.0224991	AITR1
AT3G27290	1.12396	0.00892417
AT3G27510	-1.06937	0.0156596
AT3G27690	-2.67248	5.94639e-16	LHCB2.3
AT3G27884	-3.37469	3.35736e-06	SORF3
AT3G27900	-1.7371	0.00903839
AT3G28050	-1.25403	1.17938e-10	UMAMIT41
AT3G28170	1.24389	0.00836643
AT3G28180	-1.19255	2.33226e-06	CSLC04
AT3G28210	1.75008	8.61377e-07	PMZ
AT3G28270	-1.02798	0.0326107	AFL1
AT3G28580	2.64749	0.000151631
AT3G28635	1.46995	0.00354542
AT3G28660	1.40504	5.46839e-05
AT3G28860	-1.07923	3.98133e-08	ABCB19
AT3G29035	-1.85223	2.55564e-09	NAC3
AT3G29200	1.13669	3.21434e-06	CM1
AT3G29240	-2.2686	5.33068e-10
AT3G29250	-1.48358	0.000387123	SDR4
AT3G29320	-2.55558	8.21396e-15	PHS1
AT3G29590	4.09362	4.98516e-12	AT5MAT
AT3G29810	-1.14574	4.48079e-05	COBL2
AT3G30180	1.0353	0.0140192	BR6OX2
AT3G30460	3.90226	5.34804e-08
AT3G30725	1.13655	0.0268288	GDU6
AT3G30775	-2.48079	4.06342e-08	ERD5
AT3G41762	-1.01019	0.0461831
AT3G42800	-2.55467	7.20269e-06
AT3G43430	-1.34521	7.67713e-05
AT3G43670	-1.07689	3.23586e-05	CUAO&#947;2
AT3G44450	3.02532	9.62121e-05	BIC2
AT3G44720	1.2464	0.000153643	ADT4
AT3G44750	1.41022	3.41924e-06	HDA3
AT3G45160	-1.78917	2.95359e-05
AT3G45230	-1.0822	0.000575378	APAP1
AT3G45638	1.37315	0.00441227
AT3G45660	1.19152	0.0202264
AT3G45700	-3.95699	7.33551e-07	NPF2.4
AT3G45710	-1.68627	1.39201e-06	NPF2.5
AT3G45780	-1.16272	7.88451e-08	PHOT1
AT3G46080	2.21605	4.4957e-06
AT3G46280	-1.23161	0.000936907
AT3G46370	-2.78685	1.47772e-09
AT3G46600	-1.59472	5.22893e-19
AT3G46640	2.11637	4.81768e-18	PCL1
AT3G46780	-2.10326	5.31492e-17	PTAC16
AT3G47010	-1.11423	0.0062202
AT3G47080	1.16123	2.71096e-09
AT3G47160	-1.70218	4.02103e-10
AT3G47340	-1.45197	0.0130211	ASN1
AT3G47420	3.34948	5.95469e-27	G3Pp1
AT3G47470	-2.13907	4.68691e-24	LHCA4
AT3G47480	1.6263	0.00109284	CML47
AT3G47560	-1.63142	7.2415e-14
AT3G47640	1.1169	0.00043129	PYE
AT3G47675	-1.36553	6.03994e-07
AT3G47690	1.55278	1.06449e-07	EB1A
AT3G47820	1.37318	0.000747631	PUB39
AT3G48115	-1.0288	1.63098e-05
AT3G48240	1.26078	0.00577811
AT3G48280	-1.42212	0.00796785	CYP71A25
AT3G48330	-1.36433	1.01407e-05	PIMT1
AT3G48360	-3.38129	4.10738e-09	bt2
AT3G48390	-4.23846	1.06172e-20	MRF4
AT3G48640	1.80878	0.00666071
AT3G48700	1.94344	8.32974e-10	CXE13
AT3G48720	-1.35049	1.01347e-05	DCF
AT3G49142	1.13983	0.00336295
AT3G49160	-1.76412	6.29043e-05
AT3G49170	1.00833	0.00184195	EMB2261
AT3G49210	1.04712	0.00751143	WSD6
AT3G49320	2.2563	6.45464e-08
AT3G49420	1.18029	5.98218e-05
AT3G49725	1.98082	2.72755e-20
AT3G49780	-1.34604	0.000645818	PSK4
AT3G49790	-3.22191	1.23972e-18
AT3G49940	-1.05141	0.00139382	LBD38
AT3G50060	-1.00704	0.00928653	MYB77
AT3G50140	-1.09087	0.0244979
AT3G50190	-1.01375	0.0433795
AT3G50210	-1.26722	1.10397e-06
AT3G50270	-1.05882	0.00417173
AT3G50420	1.24703	0.000903944
AT3G50440	-1.32334	0.00179948	MES10
AT3G50470	-2.50288	0.00168174	HR3
AT3G50740	-1.14168	1.36407e-06	UGT72E1
AT3G50750	-2.14301	1.29382e-20	BEH1
AT3G50760	1.85322	3.60561e-05	GATL2
AT3G50800	-1.00167	0.0320567
AT3G50820	-1.30248	4.74873e-12	PSBO2
AT3G50840	-1.2089	0.000515641
AT3G50880	-1.22986	3.96546e-05
AT3G50910	1.26627	9.80554e-09
AT3G50930	1.32543	0.00181401	BCS1
AT3G50970	3.29776	2.18562e-20	LTI30
AT3G50980	-2.39835	0.000103906	XERO1
AT3G51000	-1.5284	6.67982e-07
AT3G51080	-1.02507	0.0115995	GATA6
AT3G51290	-1.0958	0.00435988	APSR1
AT3G51325	-1.42747	0.00790823
AT3G51350	1.19554	0.00715655
AT3G51440	-1.51351	7.45397e-05
AT3G51800	1.0455	9.3493e-05	ATG2
AT3G51840	-1.36142	2.36048e-05	ACX4
AT3G51910	-1.60302	2.31154e-06	HSFA7A
AT3G51960	-1.46005	6.49461e-05	BZIP24
AT3G52060	-2.1106	1.13469e-10	GNTL
AT3G52360	-1.02901	0.00325774
AT3G52370	1.37703	0.000472643	FLA15
AT3G52390	1.41268	2.31076e-07
AT3G52470	1.12941	2.94218e-05
AT3G52480	-1.65397	0.000522852
AT3G52740	2.85339	5.92852e-15	BIC1
AT3G52870	1.92319	1.50444e-10
AT3G53220	1.15701	0.00428268
AT3G53250	-3.84761	0.000102456	SAUR57
AT3G53260	1.61641	3.83477e-08	PAL2
AT3G53420	-1.2144	3.68964e-13	PIP2A
AT3G53460	1.0726	0.00218512	CP29
AT3G53530	1.50444	1.32457e-05	NAKR3
AT3G53800	-2.72439	3.34545e-23	Fes1B
AT3G53950	-1.11769	5.39748e-05
AT3G54260	-1.39333	0.000206178	TBL36
AT3G54460	-1.55107	2.92189e-14
AT3G54880	-1.96003	5.59776e-09
AT3G54890	-1.6653	8.90249e-19	LHCA1
AT3G54990	1.78469	9.85065e-10	SMZ
AT3G55120	3.44446	5.5425e-19	TT5
AT3G55240	-5.54102	4.29965e-13
AT3G55510	1.55056	2.41895e-06	RBL
AT3G55560	-1.02034	8.44039e-07	AHL15
AT3G55580	4.20647	1.61635e-20	TCF1
AT3G55940	2.03198	3.35652e-07	PLC7
AT3G56000	-2.11842	1.87672e-05	CSLA14
AT3G56040	-1.00325	6.39884e-06	UGP3
AT3G56060	-1.08464	0.000580914
AT3G56090	1.47376	8.49072e-05	FER3
AT3G56260	3.04198	2.07064e-13
AT3G56290	2.40262	6.47496e-08
AT3G56300	1.1979	0.00019226
AT3G56320	1.09746	0.000144195	NTP7
AT3G56710	1.31096	0.00930766	SIB1
AT3G56890	1.45816	0.00186692
AT3G56960	1.14792	3.04183e-05	PIP5K4
AT3G56990	1.41846	1.88156e-06	EDA7
AT3G57010	1.00291	0.0103324
AT3G57020	1.2549	6.1916e-05
AT3G57150	1.00722	0.000188968	NAP57
AT3G57157	1.54548	0.00147973	SORF5
AT3G57360	1.53597	0.000161838
AT3G57460	1.2374	0.0253998
AT3G57470	-1.00995	1.77047e-05
AT3G57520	-1.28701	0.0022856	SIP2
AT3G57660	1.0177	0.000122966	NRPA1
AT3G57780	1.04934	0.000195548
AT3G57940	1.85863	1.35575e-09
AT3G58070	2.32808	0.00141042	GIS
AT3G58120	-2.1979	3.67761e-08	BZIP61
AT3G58520	1.66492	2.5363e-06
AT3G58660	1.17918	6.6005e-06
AT3G59068	1.34929	0.020189
AT3G59110	-1.37409	1.17938e-10
AT3G59250	-2.05621	0.000429024
AT3G59330	-1.18424	0.00663902
AT3G59340	-1.34446	0.00796785
AT3G59370	-1.14514	0.0130344
AT3G59480	-1.93261	7.17901e-05	FRK7
AT3G59670	1.04965	0.000198388
AT3G59820	2.5614	2.67909e-23	LETM1
AT3G59900	-1.47649	0.000816116	ARGOS
AT3G60220	-1.73965	2.14853e-06	ATL4
AT3G60310	-1.02859	0.00120469
AT3G60340	-1.07615	4.90849e-06
AT3G60390	-2.094	7.39636e-22	HAT3
AT3G60415	1.63753	0.000157634
AT3G60490	-1.07669	0.0212734	ERF35
AT3G60530	-1.56712	1.23249e-06	GATA4
AT3G60670	-1.1319	0.0267687	PLATZ10
AT3G61060	-2.90619	5.17497e-18	PP2-A13
AT3G61198	-3.41202	7.55915e-08
AT3G61210	-1.89844	8.81334e-07
AT3G61220	1.63432	1.60329e-06	SDR1
AT3G61260	-1.67562	2.38873e-05	REM1.2
AT3G61430	-1.44088	2.9206e-08	PIP1A
AT3G61470	-1.84309	5.47944e-17	LHCA2
AT3G61520	1.21119	4.47839e-05
AT3G61560	1.25167	1.20053e-08	RTNLB6
AT3G61750	1.23779	1.41843e-05
AT3G61760	1.74736	4.55741e-05	DL1B
AT3G61898	-1.54101	0.00145181
AT3G62010	-1.16802	4.55257e-07
AT3G62070	-1.58496	5.59273e-05
AT3G62100	-1.23861	0.00977804	IAA30
AT3G62270	1.10517	0.000698967	BOR2
AT3G62290	-1.16391	2.72285e-08	ARFA1E
AT3G62550	-2.20788	4.99532e-06
AT3G62570	-1.34	0.000989464
AT3G62610	4.25706	1.69753e-06	MYB11
AT3G62650	-1.22744	6.02245e-05
AT3G62740	1.51802	3.70657e-05	BGLU7
AT3G62750	-2.24768	1.57771e-27	BGLU8
AT3G62860	-1.97857	9.04105e-10	MAGL12
AT3G62930	-1.16262	0.0145311	GRXS6
AT3G62950	-4.51356	6.00798e-17	GRXC11
AT3G63060	1.84194	9.9864e-05	EDL3
AT3G63088	-2.91	0.00149915	RTFL14
AT3G63210	-1.59452	1.83414e-08	MARD1
AT3TE08235	-1.52696	0.000235094
AT3TE43380	-1.03565	0.0346596
AT3TE48430	-1.87691	0.00700817
AT3TE63095	-1.04176	0.0331671
AT3TE63105	-1.64209	0.0103036
AT3TE63110	-2.50213	0.00273767
AT3TE63125	-2.531	0.00259871
AT3TE63130	-1.20327	0.0290995
AT4G00050	2.36196	9.28642e-16	UNE10
AT4G00200	1.10308	1.97254e-06	AHL7
AT4G00355	-1.17612	1.32395e-05	ATI2
AT4G00490	1.34176	1.94909e-08	BAM2
AT4G00780	-1.24808	4.35869e-07
AT4G00950	-1.50787	1.71141e-05	MEE47
AT4G01026	-1.93353	1.08603e-09	PYL7
AT4G01080	2.22822	1.44293e-05	TBL26
AT4G01250	-1.89289	1.01056e-05	WRKY22
AT4G01330	-3.12717	6.29514e-14
AT4G01335	-1.45447	0.0140632
AT4G01360	1.16615	0.0233345	BPS3
AT4G01460	-2.09035	1.48376e-07
AT4G01660	1.85106	5.74997e-10	ABC1
AT4G01870	1.26086	0.000633253
AT4G01970	1.39445	0.00461395	STS
AT4G01985	4.6296	5.87487e-18
AT4G02075	-1.25208	0.00218233	PIT1
AT4G02290	-1.23475	0.00471045	GH9B13
AT4G02400	1.27745	1.47215e-08
AT4G02540	-1.42503	2.46295e-05
AT4G02710	1.78947	3.45458e-08	NET1C
AT4G02750	1.05676	0.00223167	SSTPR
AT4G02770	-1.50938	5.21382e-12	PSAD-1
AT4G02825	-2.45261	2.36445e-08
AT4G02930	1.42107	2.91378e-07
AT4G03030	-1.06831	0.000496203
AT4G03125	5.02562	1.36854e-11
AT4G03190	-1.4263	7.0815e-09	GRH1
AT4G03292	1.08366	0.0391822
AT4G03510	-3.09459	3.68383e-25	RMA1
AT4G04180	1.16441	1.52155e-05
AT4G04190	1.24256	0.00101564
AT4G04485	1.42904	0.0170074
AT4G04630	-3.17964	1.34351e-09
AT4G04670	1.10717	3.118e-05	TRM5C
AT4G04810	-2.24622	6.0469e-07	MSRB4
AT4G04830	-1.50472	3.05736e-07	MSRB5
AT4G04845	-2.64354	0.000687174
AT4G04865	-2.20046	0.00413932
AT4G04940	1.48637	3.14148e-05
AT4G05020	2.41952	1.08632e-09	NDB2
AT4G05070	-2.17165	8.73205e-08	WIP2
AT4G05150	-1.14661	3.77737e-10
AT4G05180	-2.16262	5.50624e-13	PSBQ-2
AT4G05410	1.3988	1.74429e-06	YAO
AT4G06115	-1.77492	0.00477246
AT4G06120	-2.91337	6.81974e-12
AT4G06746	2.98318	2.77369e-15	RAP2.9
AT4G06790	1.59331	0.0125998
AT4G07385	2.6493	0.00146473
AT4G07395	5.08478	8.60059e-06
AT4G07815	1.20866	0.0268822
AT4G08160	-1.97758	0.000306748
AT4G08290	-1.69491	5.26419e-06	UMAMIT20
AT4G08390	1.64038	6.44283e-08	SAPX
AT4G08505	-3.23288	0.000888952
AT4G08570	1.8506	0.00015158	HIPP24
AT4G08920	-1.55089	6.67356e-16	CRY1
AT4G08950	-1.41897	3.7882e-05	EXO
AT4G09020	1.09628	4.83136e-05	ISA3
AT4G09030	1.63442	0.00732922	AGP10
AT4G09080	1.13541	0.0185575	TOC75-IV
AT4G09160	-1.26671	7.94835e-06	PATL5
AT4G09215	1.00817	0.0450105
AT4G09375	-1.50778	0.00374834
AT4G09460	-1.4556	4.11876e-06	MYB6
AT4G09750	2.09808	1.12576e-11
AT4G09770	-1.23356	0.01519
AT4G09820	3.67182	2.30137e-07	TT8
AT4G09970	1.22783	0.000202874
AT4G10040	1.44942	6.05071e-05	CYTC-2
AT4G10060	-1.45375	9.77973e-11	GCD3
AT4G10310	-2.82014	3.75282e-07	HKT1
AT4G10340	-1.95696	2.63252e-19	LHCB5
AT4G10500	-1.8646	0.00460625	DLO1
AT4G10510	-2.01098	0.00292499
AT4G10650	1.48096	5.84205e-05
AT4G10770	-1.50088	0.000329493	OPT7
AT4G10925	-1.01031	0.0044199
AT4G10960	1.38017	6.07369e-06	UGE5
AT4G11060	1.33567	1.35237e-07	MTSSB
AT4G11140	1.59467	0.000383249	CRF1
AT4G11190	-1.22723	0.0148323
AT4G11211	-1.50483	0.00107147
AT4G11320	-1.54611	0.000138414	CP2
AT4G11350	1.33117	0.000115511
AT4G11360	-1.2511	0.000575378	RHA1B
AT4G11530	-1.2367	0.000138564	CRK34
AT4G11590	1.36141	0.0202865
AT4G11600	1.2946	1.33449e-05	GPX6
AT4G11610	-1.2512	0.0148571	MCTP7
AT4G11960	-1.16303	3.20951e-07	PGRL1B
AT4G12000	2.27826	1.07432e-16
AT4G12080	-1.31197	0.000942929	AHL1
AT4G12120	1.25625	2.86734e-07	SEC1B
AT4G12130	1.74762	3.77958e-07	COG0354
AT4G12290	1.63821	4.4802e-07	CUAO
AT4G12330	-2.3379	1.14782e-06	CYP706A7
AT4G12400	-2.39378	2.55981e-07	Hop3
AT4G12420	-1.37225	4.87193e-05	SKU5
AT4G12470	4.01756	1.06902e-81	AZI1
AT4G12480	3.01359	2.04158e-28	EARLI1
AT4G12490	2.84279	0.000222008	AZI3
AT4G12500	2.14468	0.000147068
AT4G12690	-4.26683	5.77085e-17
AT4G12735	2.77798	1.21292e-05
AT4G12800	-1.22558	1.9381e-15	PSAL
AT4G12900	-1.36869	0.00536114
AT4G13000	1.04873	0.0293782
AT4G13190	-2.88615	0.00117162	PBL24
AT4G13290	-1.27092	0.0101784	CYP71A19
AT4G13300	-1.11182	0.0339244	TPS13
AT4G13310	-2.29939	0.000217899	CYP71A20
AT4G13495	-1.33551	6.51113e-12
AT4G13575	-2.79427	7.92964e-41
AT4G13580	-1.21166	0.00910452
AT4G13830	-3.48195	9.69765e-19	J20
AT4G13860	-1.33066	0.000152811
AT4G13930	1.37017	5.75622e-06	SHM4
AT4G14090	2.86693	3.94405e-08
AT4G14104	1.20596	0.0264282
AT4G14140	-2.08116	0.00211217	DMT2
AT4G14270	-2.75245	1.34539e-19
AT4G14365	1.44217	0.000538342	XBAT34
AT4G14368	1.04297	0.0365807
AT4G14540	-1.38217	1.99616e-10	NF-YB3
AT4G14620	-1.2774	6.67505e-05
AT4G14660	1.40882	3.17743e-09	NRPE7
AT4G14690	6.94276	5.28331e-16	ELIP2
AT4G14716	-1.31405	5.34043e-09	ARD1
AT4G14750	-1.69632	1.7704e-07	IQD19
AT4G14870	-1.22528	8.24121e-08	SECE1
AT4G15130	1.41387	2.1003e-09	CCT2
AT4G15248	4.02907	2.77209e-13	BBX30
AT4G15330	-1.6288	0.000298783	CYP705A1
AT4G15340	-1.29027	0.00488339	PEN1
AT4G15350	1.68657	0.00638447	CYP705A2
AT4G15370	1.29645	0.0229878	BARS1
AT4G15400	-1.23818	0.00330585	BIA1
AT4G15430	2.25996	1.99204e-19
AT4G15440	2.00628	1.79583e-05	HPL1
AT4G15480	5.15321	3.87787e-15	UGT84A1
AT4G15490	1.23031	0.000105414	UGT84A3
AT4G15560	-1.4562	4.66999e-15	CLA1
AT4G15740	-1.70617	0.00325061
AT4G15770	1.09967	0.000326625
AT4G15810	1.07176	2.39669e-05
AT4G15850	1.00876	0.000193368	RH1
AT4G15910	1.11247	4.71074e-08	DI21
AT4G15920	-1.23221	6.94251e-05	SWEET17
AT4G15990	-1.80511	2.33654e-05
AT4G16000	-4.51951	1.23274e-15
AT4G16008	-3.12235	1.34238e-12
AT4G16140	1.33983	7.55144e-06
AT4G16370	1.82392	4.74724e-07	OPT3
AT4G16390	1.05514	0.00301	SVR7
AT4G16520	-1.45323	1.97155e-06	ATG8F
AT4G16630	1.21658	8.95937e-06
AT4G16700	1.04065	0.000427904	PSD1
AT4G16745	-1.26923	0.00072764
AT4G16750	1.24979	0.00214329	ERF39
AT4G16770	-1.31392	0.000660281
AT4G16780	-2.12895	0.000229211	HB-2
AT4G16790	-1.15089	0.000626184
AT4G16835	1.64346	1.50326e-05
AT4G16857	-1.19095	0.00101824
AT4G17030	1.06443	0.00155591	EXLB1
AT4G17090	3.33023	2.16488e-11	CT-BMY
AT4G17245	-1.67791	1.2886e-05	ATL18
AT4G17250	-1.40223	3.16298e-06
AT4G17340	-4.4557	1.00098e-33	TIP2;2
AT4G17460	-2.35383	1.9996e-09	HAT1
AT4G17486	-1.06756	1.54519e-07
AT4G17500	-1.34001	0.000180602	ERF-1
AT4G17550	2.33803	1.98947e-23	G3Pp4
AT4G17670	3.21684	4.01621e-07
AT4G17760	1.06562	0.0160747
AT4G17810	-1.17748	0.00152123	ZP1
AT4G17870	-1.48626	3.28008e-09	PYR1
AT4G18010	1.43769	0.000272859	IP5PII
AT4G18250	2.2773	0.00246701
AT4G18390	1.0225	0.000903529	TCP2
AT4G18422	7.39669	4.31139e-08
AT4G18490	-1.61958	0.00302103
AT4G18670	-1.10655	2.58528e-05	LRX5
AT4G18750	1.5961	2.46295e-05	DOT4
AT4G18810	1.30207	8.432e-05
AT4G18840	1.14885	0.00282283
AT4G18940	-1.62895	0.00592243
AT4G18970	-1.12632	0.000230477
AT4G19120	1.02886	0.000720548	ERD3
AT4G19160	-2.67743	1.3822e-16
AT4G19170	-3.29713	1.9917e-49	NCED4
AT4G19230	1.9154	8.10242e-06	CYP707A1
AT4G19390	1.37105	9.72657e-13
AT4G19420	-1.42799	4.79312e-07	PAE8
AT4G19450	1.23627	0.00013319
AT4G19520	1.03284	2.22914e-06
AT4G19530	-2.23335	3.51384e-18
AT4G19690	1.18632	0.000816116	IRT1
AT4G19860	-1.63472	2.52679e-08
AT4G19865	-1.22566	0.00468188
AT4G19920	-1.59089	0.0118629
AT4G19970	1.24637	0.0243927
AT4G20070	1.15296	0.000588269	AAH
AT4G20170	1.54831	1.13803e-15	GALS3
AT4G20362	-1.97894	0.000133354	SORF6
AT4G20770	1.42205	0.00309601
AT4G20820	-3.11029	1.05543e-07	ATBBE18
AT4G20890	1.30559	7.77794e-12	TUB9
AT4G20953	1.4754	0.0149531
AT4G21215	1.29565	0.000683906
AT4G21280	-1.11522	3.58388e-08	PSBQA
AT4G21340	-1.00695	0.0408177	B70
AT4G21400	-1.50095	9.44336e-05	CRK28
AT4G21410	-1.0349	0.000160611	CRK29
AT4G21445	-1.33147	0.000129178	CRR9
AT4G21510	-1.24089	2.10365e-05	FBS2
AT4G21650	-2.27061	1.75651e-08	SBT3.13
AT4G21850	-1.21197	0.00159543	MSRB9
AT4G21870	-1.39004	0.00129171
AT4G21920	2.37483	4.51623e-05
AT4G21970	-1.73042	0.0058642
AT4G22320	1.00596	0.000123338
AT4G22540	-1.04915	0.000113586	ORP2A
AT4G22590	1.3725	4.8826e-08	TPPG
AT4G22756	-1.33829	0.00108789	SMO1-2
AT4G22758	1.19889	0.000394415
AT4G22770	1.2416	0.000234912	AHL2
AT4G22880	2.90023	5.43845e-07	LDOX
AT4G23200	1.21603	0.000151631	CRK12
AT4G23400	-1.90909	3.97362e-20	PIP1;5
AT4G23410	-2.14704	4.57388e-06	TET5
AT4G23420	-1.00157	0.00932445
AT4G23630	1.25454	4.35591e-10	BTI1
AT4G23670	-2.29789	2.46613e-06
AT4G23680	-1.70865	0.00140884
AT4G23750	1.02249	0.00034545	CRF2
AT4G23820	-1.06294	0.000809701
AT4G23870	-1.23614	0.000495319
AT4G23920	1.12164	1.28434e-06	UGE2
AT4G23950	1.53389	4.80093e-10	SUN5
AT4G23990	1.9907	8.22063e-05	CSLG3
AT4G24050	-2.24348	8.54522e-11
AT4G24140	1.12229	0.00244986
AT4G24230	-2.39984	8.20802e-09	ACBP3
AT4G24275	-1.14797	0.00253011
AT4G24410	1.37004	0.00160351
AT4G24413	2.21893	3.2811e-09
AT4G24800	-1.1518	1.74627e-10	ECIP1
AT4G24960	2.33008	3.02425e-13	HVA22D
AT4G25080	-1.07008	9.09251e-07	CHLM
AT4G25260	-1.44378	0.00040856	PMEI7
AT4G25310	1.05329	0.0155547
AT4G25340	1.20593	5.90234e-06	FKBP53
AT4G25433	7.07034	2.12365e-16
AT4G25470	2.2946	1.74271e-06	CBF2
AT4G25480	1.97207	0.00246018	DREB1A
AT4G25630	2.2339	8.35961e-10	FIB2
AT4G25631	1.18922	0.0197644	U60.2F
AT4G25640	1.64425	1.89148e-11	DTX35
AT4G25707	-1.03306	0.0318294
AT4G25730	1.26925	7.27621e-07	TRM7B
AT4G25760	1.34349	0.00300558	GDU2
AT4G25835	-1.16048	0.000458718
AT4G25850	1.1531	0.0284146	ORP4B
AT4G26150	2.39479	1.62354e-11	CGA1
AT4G26260	-3.7357	6.68006e-11	MIOX4
AT4G26400	-1.22626	0.000111223	BTL05
AT4G26540	-1.19349	0.000141564	RGFR3
AT4G26555	-1.50709	8.03528e-10
AT4G26600	1.18153	1.94338e-07	NOP2B
AT4G26810	1.16408	0.000627316
AT4G26850	1.84319	1.70255e-08	VTC2
AT4G26950	3.94769	6.88849e-05
AT4G27030	1.38232	0.000117112	FADA
AT4G27260	-2.48984	6.91511e-06	WES1
AT4G27360	5.94585	7.15507e-25
AT4G27370	-1.31014	1.52011e-06	VIIIB
AT4G27435	-1.75412	0.000653214
AT4G27450	-4.41425	4.1072e-14	HUP54
AT4G27460	-1.05234	0.0321697	CBSX5
AT4G27470	-1.80331	9.7832e-10	RMA3
AT4G27520	1.57783	1.83598e-05	ENODL2
AT4G27560	2.66534	1.0333e-06	UGT79B2
AT4G27652	1.24179	0.000203878
AT4G27657	3.08526	2.13872e-14
AT4G27710	-1.84781	6.65357e-17	CYP709B3
AT4G27740	-2.4648	3.97494e-08
AT4G27745	-1.10561	0.00129393
AT4G27830	1.51448	1.40637e-05	BGLU10
AT4G27860	-1.39388	2.4842e-07	MEB1
AT4G27940	2.19738	1.14976e-09	MTM1
AT4G27970	1.52691	1.01117e-05	SLAH2
AT4G28050	-1.13533	0.000138436	TET7
AT4G28240	-3.09195	1.85513e-17	WIP1
AT4G28270	-2.96801	7.56766e-11	RMA2
AT4G28320	1.05352	0.000241401	MAN5
AT4G28450	1.15633	4.0059e-05
AT4G28510	1.04647	2.98478e-05	PHB1
AT4G28560	1.8404	0.000685876	RIC7
AT4G28590	1.37587	5.18809e-06	MRL7
AT4G28703	-1.0911	0.0185389
AT4G28720	-2.52047	1.68225e-05	YUC8
AT4G28750	-1.78371	9.57887e-28	PSAE-1
AT4G29110	2.53074	1.83554e-09
AT4G29310	-1.83802	1.76186e-09
AT4G29590	1.07966	1.394e-05
AT4G29890	-1.65045	1.01245e-08
AT4G29905	-1.47535	0.000133827
AT4G30230	1.08844	0.0169812
AT4G30410	-2.06753	4.57388e-06	IBL1
AT4G30450	-1.60438	8.38979e-07
AT4G30470	2.14951	1.44645e-13
AT4G30650	3.13747	3.05714e-08
[truncated: 769 more rows]
