# Supplementary material for: Cold stress induces rapid gene-specific changes in the levels of H3K4me3 and H3K27me3 in Arabidopsis thaliana
Source: Front Plant Sci. 2024 Apr 15;15:1390144. doi: 10.3389/fpls.2024.1390144 (PMC11056581; doi:10.3389/fpls.2024.1390144)
Supplement: Supplementary file 6 [file Table_5.xlsx]

## Sheet: K4_3h_Gain
Supplementary Table 5
(A) GO Term analysis (biological function) of genes gaining H3K4me3 after 3h of cold exposure
GO.ID	Term	Annotated	Significant	Expected	raw.p.value	logPvalue	FoldEnrichment
GO:0009409	response to cold	654	146	71.18	7.9e-15	14.1024	2.05114
GO:0009416	response to light stimulus	2293	420	249.58	2.4e-13	12.6198	1.68283
GO:0019538	protein metabolic process	4155	609	452.24	1.1e-12	11.9586	1.34663
GO:0009642	response to light intensity	388	96	42.23	2.8e-11	10.5528	2.27327
GO:0044248	cellular catabolic process	1730	293	188.3	1.2e-10	9.92082	1.55603
GO:0009414	response to water deprivation	1277	213	138.99	1.8e-10	9.74473	1.53248
GO:0071456	cellular response to hypoxia	242	55	26.34	8.6e-08	7.0655	2.08808
GO:1901565	organonitrogen compound catabolic process	1191	206	129.63	9.6e-08	7.01773	1.58914
GO:0050832	defense response to fungus	914	148	99.48	2.3e-07	6.63827	1.48774
GO:0044271	cellular nitrogen compound biosynthetic process	4356	593	474.12	4.5e-07	6.34679	1.25074
GO:0010468	regulation of gene expression	3794	502	412.95	1.1e-06	5.95861	1.21564
GO:0042742	defense response to bacterium	1111	180	120.92	1.7e-06	5.76955	1.48859
GO:0016070	RNA metabolic process	5312	669	578.17	2.3e-05	4.63827	1.1571
GO:0051641	cellular localization	1211	188	131.81	2.7e-05	4.56864	1.4263
GO:0009737	response to abscisic acid	1273	194	138.56	2.9e-05	4.5376	1.40012
GO:0009617	response to bacterium	1393	233	151.62	6.2e-05	4.20761	1.53674
GO:0042440	pigment metabolic process	418	82	45.5	7.5e-05	4.12494	1.8022
GO:0015996	chlorophyll catabolic process	44	15	4.79	0.00012	3.92082	3.13152
GO:0009651	response to salt stress	723	119	78.69	0.00013	3.88606	1.51226
GO:0043617	cellular response to sucrose starvation	4	4	0.44	0.00014	3.85387	9.09091
GO:0031347	regulation of defense response	882	144	96	0.00021	3.67778	1.5
GO:0009742	brassinosteroid mediated signaling pathway	80	21	8.71	0.00034	3.46852	2.41102
GO:0009723	response to ethylene	275	49	29.93	0.00037	3.4318	1.63715
GO:0006979	response to oxidative stress	745	125	81.09	0.00042	3.37675	1.5415
GO:0014070	response to organic cyclic compound	981	174	106.77	0.00045	3.34679	1.62967
GO:0006511	ubiquitin-dependent protein catabolic process	535	78	58.23	0.00049	3.3098	1.33952
GO:0009646	response to absence of light	54	15	5.88	0.00053	3.27572	2.55102
GO:0048507	meristem development	621	85	67.59	0.00059	3.22915	1.25758
GO:0042335	cuticle development	10	6	1.09	0.00064	3.19382	5.50459
GO:0044281	small molecule metabolic process	3201	486	348.4	0.00068	3.16749	1.39495
GO:0071483	cellular response to blue light	42	12	4.57	0.00073	3.13668	2.62582
GO:1901135	carbohydrate derivative metabolic process	1035	140	112.65	0.0008	3.09691	1.24279
GO:0006520	amino acid metabolic process	623	101	67.81	0.00101	2.99568	1.48946
GO:0051171	regulation of nitrogen compound metabolic process	3690	487	401.63	0.0012	2.92082	1.21256
GO:0009061	anaerobic respiration	9	5	0.98	0.00131	2.88273	5.10204
GO:0009611	response to wounding	942	132	102.53	0.00147	2.83268	1.28743
GO:0044255	cellular lipid metabolic process	1177	188	128.11	0.00194	2.7122	1.46749
GO:0019752	carboxylic acid metabolic process	1660	249	180.68	0.00213	2.67162	1.37813
GO:0034599	cellular response to oxidative stress	76	19	8.27	0.00228	2.64207	2.29746
GO:0043455	regulation of secondary metabolic process	102	21	11.1	0.00229	2.64016	1.89189
GO:0010189	vitamin E biosynthetic process	15	6	1.63	0.00239	2.6216	3.68098
GO:0071482	cellular response to light stimulus	187	37	20.35	0.0025	2.60206	1.81818
GO:0009631	cold acclimation	57	14	6.2	0.00265	2.57675	2.25806
GO:0048527	lateral root development	149	23	16.22	0.00306	2.51428	1.418
GO:0080090	regulation of primary metabolic process	3811	495	414.8	0.00314	2.50307	1.19335
GO:0009958	positive gravitropism	35	10	3.81	0.00325	2.48812	2.62467
GO:0007623	circadian rhythm	168	33	18.29	0.00351	2.45469	1.80426
GO:0009083	branched-chain amino acid catabolic process	27	10	2.94	0.00372	2.42946	3.40136
GO:1900458	negative regulation of brassinosteroid mediated signaling pa...	7	4	0.76	0.00374	2.42713	5.26316
GO:0006970	response to osmotic stress	1069	172	116.35	0.0038	2.42022	1.4783
GO:0006810	transport	2516	316	273.85	0.00383	2.4168	1.15392
GO:0071472	cellular response to salt stress	42	12	4.57	0.00406	2.39147	2.62582
GO:0009733	response to auxin	449	74	48.87	0.00428	2.36856	1.51422
GO:1901575	organic substance catabolic process	1972	305	214.64	0.00433	2.36351	1.42098
GO:0009755	hormone-mediated signaling pathway	1089	172	118.53	0.00447	2.34969	1.45111
GO:0071310	cellular response to organic substance	1877	285	204.3	0.00451	2.34582	1.39501
GO:0051252	regulation of RNA metabolic process	2754	348	299.75	0.00453	2.3439	1.16097
GO:0033036	macromolecule localization	1074	147	116.9	0.00454	2.34294	1.25749
GO:0015994	chlorophyll metabolic process	239	56	26.01	0.00456	2.34104	2.15302
GO:0010604	positive regulation of macromolecule metabolic process	960	109	104.49	0.00467	2.33068	1.04316
GO:0033013	tetrapyrrole metabolic process	325	77	35.37	0.00471	2.32698	2.17699
GO:0019674	NAD metabolic process	20	8	2.18	0.00472	2.32606	3.66972
GO:0006741	NADP biosynthetic process	4	3	0.44	0.00473	2.32514	6.81818
GO:0010272	response to silver ion	4	3	0.44	0.00473	2.32514	6.81818
GO:0001887	selenium compound metabolic process	4	3	0.44	0.00473	2.32514	6.81818
GO:0031648	protein destabilization	4	3	0.44	0.00473	2.32514	6.81818
GO:0010224	response to UV-B	74	17	8.05	0.00489	2.31069	2.1118
GO:0007165	signal transduction	2485	364	270.47	0.00556	2.25493	1.34581
GO:0097305	response to alcohol	1417	222	154.23	0.00672	2.17263	1.43941
GO:0070814	hydrogen sulfide biosynthetic process	8	4	0.87	0.00683	2.16558	4.5977
GO:0010264	myo-inositol hexakisphosphate biosynthetic process	8	4	0.87	0.00683	2.16558	4.5977
GO:0033014	tetrapyrrole biosynthetic process	150	35	16.33	0.00697	2.15677	2.14329
GO:0032544	plastid translation	22	7	2.39	0.00699	2.15552	2.92887
GO:0009892	negative regulation of metabolic process	1062	155	115.59	0.00716	2.14509	1.34095
GO:0018130	heterocycle biosynthetic process	3556	471	387.04	0.00722	2.14146	1.21693
GO:0045892	negative regulation of DNA-templated transcription	233	37	25.36	0.00779	2.10846	1.45899
GO:0009624	response to nematode	84	17	9.14	0.00836	2.07779	1.85996
GO:0009620	response to fungus	1167	191	127.02	0.00847	2.07212	1.5037
GO:0019684	photosynthesis, light reaction	186	35	20.24	0.00866	2.06248	1.72925
GO:0009751	response to salicylic acid	431	68	46.91	0.00876	2.0575	1.44958
GO:0019219	regulation of nucleobase-containing compound metabolic proce...	3097	395	337.09	0.00892	2.04964	1.17179
GO:0090630	activation of GTPase activity	23	7	2.5	0.00912	2.04001	2.8
GO:0080163	regulation of protein serine/threonine phosphatase activity	18	6	1.96	0.00965	2.01547	3.06122
GO:0006355	regulation of DNA-templated transcription	2437	295	265.25	0.00986	2.00612	1.11216

## Sheet: K4_3h_Loss
Supplementary Table 5
(B) GO Term analysis (biological function) of genes losing H3K4me3 after 3h of cold exposure
GO.ID	Term	Annotated	Significant	Expected	raw.p.value	logPvalue	FoldEnrichment
GO:0009451	RNA modification	381	25	8.58	6.2e-06	5.20761	2.91375
GO:0007018	microtubule-based movement	63	8	1.42	8.2e-05	4.08619	5.6338
GO:0030422	siRNA processing	38	6	0.86	0.00014	3.85387	6.97674
GO:0033231	carbohydrate export	2	2	0.05	0.00051	3.29243	40
GO:0042026	protein refolding	37	5	0.83	0.00137	2.86328	6.0241
GO:0051307	meiotic chromosome separation	3	2	0.07	0.0015	2.82391	28.5714
GO:0007094	mitotic spindle assembly checkpoint signaling	11	3	0.25	0.00164	2.78516	12
GO:0061077	chaperone-mediated protein folding	63	6	1.42	0.00418	2.37882	4.22535
GO:0050821	protein stabilization	30	4	0.68	0.00438	2.35853	5.88235
GO:0051639	actin filament network formation	5	2	0.11	0.00484	2.31515	18.1818
GO:0051026	chiasma assembly	16	3	0.36	0.00511	2.29158	8.33333
GO:0051754	meiotic sister chromatid cohesion, centromeric	6	2	0.14	0.00715	2.14569	14.2857

## Sheet: K4_3d_Gain
Supplementary Table 5
(C) GO Term analysis (biological function) of genes gaining H3K4me3 after 3d of cold exposure
GO.ID	Term	Annotated	Significant	Expected	raw.p.value	logPvalue	FoldEnrichment
GO:0009414	response to water deprivation	1277	170	75.3	8.9e-21	20.0506	2.25764
GO:0009409	response to cold	654	112	38.56	8.9e-18	17.0506	2.90456
GO:0007623	circadian rhythm	168	48	9.91	1.2e-13	12.9208	4.84359
GO:0009611	response to wounding	942	113	55.54	2.4e-13	12.6198	2.03457
GO:0009416	response to light stimulus	2293	287	135.2	2.2e-11	10.6576	2.12278
GO:0044248	cellular catabolic process	1730	174	102.01	3.2e-11	10.4949	1.70572
GO:0009737	response to abscisic acid	1273	146	75.06	3.3e-11	10.4815	1.94511
GO:0009651	response to salt stress	723	92	42.63	2.8e-10	9.55284	2.1581
GO:0006979	response to oxidative stress	745	93	43.93	2.9e-09	8.5376	2.117
GO:0009749	response to glucose	69	18	4.07	1.4e-08	7.85387	4.4226
GO:0009631	cold acclimation	57	17	3.36	1.7e-08	7.76955	5.05952
GO:0009642	response to light intensity	388	62	22.88	2e-08	7.69897	2.70979
GO:0010114	response to red light	103	26	6.07	4.2e-08	7.37675	4.28336
GO:0050832	defense response to fungus	914	94	53.89	1e-07	7	1.74429
GO:0071456	cellular response to hypoxia	242	37	14.27	1.9e-07	6.72125	2.59285
GO:0009266	response to temperature stimulus	1319	179	77.77	6.8e-07	6.16749	2.30166
GO:0009637	response to blue light	182	37	10.73	1e-06	6	3.44828
GO:1901565	organonitrogen compound catabolic process	1191	111	70.22	1.4e-06	5.85387	1.58075
GO:0042753	positive regulation of circadian rhythm	12	7	0.71	1.5e-06	5.82391	9.85915
GO:0006355	regulation of DNA-templated transcription	2437	209	143.69	1.9e-06	5.72125	1.45452
GO:0009891	positive regulation of biosynthetic process	628	67	37.03	2.9e-06	5.5376	1.80934
GO:0006970	response to osmotic stress	1069	133	63.03	4.3e-06	5.36653	2.11011
GO:0009744	response to sucrose	76	16	4.48	6.4e-06	5.19382	3.57143
GO:0009813	flavonoid biosynthetic process	122	19	7.19	1.3e-05	4.88606	2.64256
GO:0046283	anthocyanin-containing compound metabolic process	67	12	3.95	1.7e-05	4.76955	3.03797
GO:0071482	cellular response to light stimulus	187	41	11.03	3.6e-05	4.4437	3.71714
GO:0015996	chlorophyll catabolic process	44	12	2.59	5e-05	4.30103	4.6332
GO:0042742	defense response to bacterium	1111	96	65.51	6.9e-05	4.16115	1.46543
GO:0071483	cellular response to blue light	42	12	2.48	9.4e-05	4.02687	4.83871
GO:0009733	response to auxin	449	45	26.47	9.4e-05	4.02687	1.70004
GO:0002181	cytoplasmic translation	86	15	5.07	0.0001	4	2.95858
GO:0097305	response to alcohol	1417	168	83.55	0.00011	3.95861	2.01077
GO:0009639	response to red or far red light	435	72	25.65	0.00011	3.95861	2.80702
GO:0009753	response to jasmonic acid	708	66	41.75	0.00012	3.92082	1.58084
GO:0010224	response to UV-B	74	14	4.36	0.00013	3.88606	3.21101
GO:0009889	regulation of biosynthetic process	3092	265	182.31	0.00013	3.88606	1.45357
GO:0071491	cellular response to red light	13	5	0.77	0.0002	3.69897	6.49351
GO:2000028	regulation of photoperiodism, flowering	101	17	5.96	0.00031	3.50864	2.85235
GO:0010218	response to far red light	55	15	3.24	0.00034	3.46852	4.62963
GO:1900458	negative regulation of brassinosteroid mediated signaling pa...	7	4	0.41	0.00036	3.4437	9.7561
GO:0009819	drought recovery	12	5	0.71	0.0004	3.39794	7.04225
GO:0070417	cellular response to cold	35	9	2.06	0.00042	3.37675	4.36893
GO:0071396	cellular response to lipid	1000	105	58.96	0.00044	3.35655	1.78087
GO:1901701	cellular response to oxygen-containing compound	1425	141	84.02	0.00046	3.33724	1.67817
GO:0042542	response to hydrogen peroxide	78	14	4.6	0.00049	3.3098	3.04348
GO:0009649	entrainment of circadian clock	19	6	1.12	0.00061	3.21467	5.35714
GO:0045893	positive regulation of DNA-templated transcription	503	46	29.66	0.00061	3.21467	1.55091
GO:0009738	abscisic acid-activated signaling pathway	266	34	15.68	0.00077	3.11351	2.16837
GO:0006858	extracellular transport	4	3	0.24	0.00078	3.10791	12.5
GO:0006749	glutathione metabolic process	60	11	3.54	0.0008	3.09691	3.10734
GO:0046686	response to cadmium ion	76	12	4.48	0.00104	2.98297	2.67857
GO:0010099	regulation of photomorphogenesis	38	11	2.24	0.00127	2.8962	4.91071
GO:0009407	toxin catabolic process	46	9	2.71	0.00128	2.89279	3.32103
GO:0010043	response to zinc ion	47	9	2.77	0.0015	2.82391	3.2491
GO:0006766	vitamin metabolic process	109	13	6.43	0.00186	2.73049	2.02177
GO:0009413	response to flooding	5	3	0.29	0.00187	2.72816	10.3448
GO:0010507	negative regulation of autophagy	5	3	0.29	0.00187	2.72816	10.3448
GO:0009646	response to absence of light	54	10	3.18	0.00202	2.69465	3.14465
GO:0006511	ubiquitin-dependent protein catabolic process	535	39	31.55	0.00208	2.68194	1.23613
GO:0042273	ribosomal large subunit biogenesis	77	12	4.54	0.00221	2.65561	2.64317
GO:0009415	response to water	1390	185	81.96	0.00264	2.5784	2.2572
GO:0046148	pigment biosynthetic process	232	23	13.68	0.00276	2.55909	1.68129
GO:0009944	polarity specification of adaxial/abaxial axis	25	6	1.47	0.00279	2.5544	4.08163
GO:0031347	regulation of defense response	882	75	52.01	0.00284	2.54668	1.44203
GO:0071489	cellular response to red or far red light	62	17	3.66	0.00342	2.46597	4.64481
GO:0071490	cellular response to far red light	6	4	0.35	0.00347	2.45967	11.4286
GO:0010151	chloroplast elongation	2	2	0.12	0.00347	2.45967	16.6667
GO:1903648	positive regulation of chlorophyll catabolic process	2	2	0.12	0.00347	2.45967	16.6667
GO:0062052	starch granule initiation	2	2	0.12	0.00347	2.45967	16.6667
GO:0043610	regulation of carbohydrate utilization	2	2	0.12	0.00347	2.45967	16.6667
GO:1900409	positive regulation of cellular response to oxidative stress	2	2	0.12	0.00347	2.45967	16.6667
GO:0051665	membrane raft localization	2	2	0.12	0.00347	2.45967	16.6667
GO:0009789	positive regulation of abscisic acid-activated signaling pat...	53	9	3.13	0.00355	2.44977	2.8754
GO:1990428	miRNA transport	6	3	0.35	0.00358	2.44612	8.57143
GO:0016070	RNA metabolic process	5312	403	313.21	0.00378	2.42251	1.28668
GO:0045926	negative regulation of growth	36	6	2.12	0.00406	2.39147	2.83019
GO:0009585	red, far-red light phototransduction	20	5	1.18	0.00521	2.28316	4.23729
GO:0009408	response to heat	405	43	23.88	0.00595	2.22548	1.80067
GO:1905582	response to mannose	7	3	0.41	0.00598	2.2233	7.31707
GO:0010031	circumnutation	7	3	0.41	0.00598	2.2233	7.31707
GO:0009735	response to cytokinin	139	20	8.2	0.0064	2.19382	2.43902
GO:1900057	positive regulation of leaf senescence	21	5	1.24	0.00651	2.18642	4.03226
GO:1901605	alpha-amino acid metabolic process	424	28	25	0.00654	2.18442	1.12
GO:0090693	plant organ senescence	373	40	21.99	0.00708	2.14997	1.81901
GO:0031667	response to nutrient levels	288	30	16.98	0.00731	2.13608	1.76678
GO:0009051	pentose-phosphate shunt, oxidative branch	14	4	0.83	0.00748	2.1261	4.81928
GO:0009785	blue light signaling pathway	22	5	1.3	0.00803	2.09528	3.84615
GO:0050688	regulation of defense response to virus	16	5	0.94	0.00913	2.03953	5.31915
GO:0044281	small molecule metabolic process	3201	232	188.74	0.00915	2.03858	1.2292
GO:0010100	negative regulation of photomorphogenesis	15	4	0.88	0.00973	2.01189	4.54545

## Sheet: K4_3d_Loss
Supplementary Table 5
(D) GO Term analysis (biological function) of genes losing H3K4me3 after 3d of cold exposure
GO.ID	Term	Annotated	Significant	Expected	raw.p.value	logPvalue	FoldEnrichment
GO:0071554	cell wall organization or biogenesis	1062	57	25.31	4.4e-06	5.35655	2.25207
GO:0009768	photosynthesis, light harvesting in photosystem I	23	6	0.55	1.3e-05	4.88606	10.9091
GO:0009753	response to jasmonic acid	708	33	16.87	2.2e-05	4.65758	1.95614
GO:0006833	water transport	39	7	0.93	0.00011	3.95861	7.52688
GO:0090558	plant epidermis development	642	25	15.3	0.00018	3.74473	1.63399
GO:0006468	protein phosphorylation	1142	46	27.22	0.00034	3.46852	1.68993
GO:1903428	positive regulation of reactive oxygen species biosynthetic ...	7	3	0.17	0.00044	3.35655	17.6471
GO:0006949	syncytium formation	16	4	0.38	0.00046	3.33724	10.5263
GO:0009408	response to heat	405	28	9.65	0.00049	3.3098	2.90155
GO:0016126	sterol biosynthetic process	29	5	0.69	0.00056	3.25181	7.24638
GO:0016127	sterol catabolic process	2	2	0.05	0.00057	3.24413	40
GO:0042546	cell wall biogenesis	520	29	12.39	0.00069	3.16115	2.3406
GO:0016053	organic acid biosynthetic process	718	25	17.11	0.00087	3.06048	1.46113
GO:0009416	response to light stimulus	2293	77	54.65	0.00139	2.85699	1.40897
GO:0009769	photosynthesis, light harvesting in photosystem II	10	3	0.24	0.00143	2.84466	12.5
GO:0019761	glucosinolate biosynthetic process	118	9	2.81	0.0021	2.67778	3.20285
GO:0010411	xyloglucan metabolic process	61	6	1.45	0.00327	2.48545	4.13793
GO:0008610	lipid biosynthetic process	902	36	21.5	0.00332	2.47886	1.67442
GO:0045492	xylan biosynthetic process	40	5	0.95	0.00414	2.383	5.26316
GO:0009826	unidimensional cell growth	484	25	11.54	0.00435	2.36151	2.16638
GO:0048589	developmental growth	1405	54	33.49	0.00457	2.34008	1.61242
GO:0009059	macromolecule biosynthetic process	4900	119	116.78	0.00489	2.31069	1.01901
GO:0034605	cellular response to heat	90	9	2.15	0.00512	2.29073	4.18605
GO:0006597	spermine biosynthetic process	5	2	0.12	0.00541	2.2668	16.6667
GO:0006421	asparaginyl-tRNA aminoacylation	5	2	0.12	0.00541	2.2668	16.6667
GO:0009266	response to temperature stimulus	1319	60	31.44	0.00798	2.098	1.9084
GO:0097272	ammonium homeostasis	6	2	0.14	0.00798	2.098	14.2857
GO:0072488	ammonium transmembrane transport	6	2	0.14	0.00798	2.098	14.2857
GO:0009615	response to virus	99	5	2.36	0.00843	2.07417	2.11864
GO:1905392	plant organ morphogenesis	989	34	23.57	0.00932	2.03058	1.44251

## Sheet: K27_3h_Gain
Supplementary Table 5
(E) GO Term analysis (biological function) of genes gaining H3K27me3 after 3h of cold exposure
GO.ID	Term	Annotated	Significant	Expected	raw.p.value	logPvalue	FoldEnrichment
GO:0019722	calcium-mediated signaling	82	10	1.48	2.2e-06	5.65758	6.75676
GO:0007267	cell-cell signaling	85	16	1.53	7e-06	5.1549	10.4575
GO:0045168	cell-cell signaling involved in cell fate commitment	44	9	0.79	2.8e-05	4.55284	11.3924
GO:0010098	suspensor development	13	4	0.23	6.6e-05	4.18046	17.3913
GO:0008284	positive regulation of cell population proliferation	28	5	0.51	0.00013	3.88606	9.80392
GO:2000023	regulation of lateral root development	29	5	0.52	0.00016	3.79588	9.61538
GO:0009786	regulation of asymmetric cell division	16	4	0.29	0.00016	3.79588	13.7931
GO:0009733	response to auxin	449	16	8.1	0.00062	3.20761	1.97531
GO:0034758	positive regulation of iron ion transport	3	2	0.05	0.00096	3.01773	40
GO:0010082	regulation of root meristem growth	43	5	0.78	0.00103	2.98716	6.41026
GO:0010078	maintenance of root meristem identity	43	5	0.78	0.00103	2.98716	6.41026
GO:0045944	positive regulation of transcription by RNA polymerase II	169	10	3.05	0.00104	2.98297	3.27869
GO:0019310	inositol catabolic process	4	2	0.07	0.0019	2.72125	28.5714
GO:2000067	regulation of root morphogenesis	33	4	0.6	0.00283	2.54821	6.66667
GO:1990641	response to iron ion starvation	17	3	0.31	0.00329	2.4828	9.67742
GO:0010088	phloem development	37	4	0.67	0.00432	2.36452	5.97015
GO:1902025	nitrate import	38	4	0.69	0.00476	2.32239	5.7971
GO:0005992	trehalose biosynthetic process	22	3	0.4	0.00697	2.15677	7.5
GO:0019748	secondary metabolic process	856	24	15.45	0.00821	2.08566	1.5534

## Sheet: K27_3h_Loss
Supplementary Table 5
(F) GO Term analysis (biological function) of genes losing H3K27me3 after 3h of cold exposure
GO.ID	Term	Annotated	Significant	Expected	raw.p.value	logPvalue	FoldEnrichment
GO:0009751	response to salicylic acid	431	8	2.01	0.00036	3.4437	3.9801
GO:0032436	positive regulation of proteasomal ubiquitin-dependent prote...	54	3	0.25	0.00206	2.68613	12
GO:0050832	defense response to fungus	914	11	4.26	0.00365	2.43771	2.58216
GO:0000103	sulfate assimilation	23	2	0.11	0.00511	2.29158	18.1818
GO:1901528	hydrogen peroxide mediated signaling pathway involved in sto...	2	1	0.01	0.00929	2.03198	100

## Sheet: K27_3d_Gain
Supplementary Table 5
(G) GO Term analysis (biological function) of genes gaining H3K27me3 after 3d of cold exposure
GO.ID	Term	Annotated	Significant	Expected	raw.p.value	logPvalue	FoldEnrichment
GO:0019722	calcium-mediated signaling	82	11	1.96	4e-06	5.39794	5.61224
GO:0007267	cell-cell signaling	85	18	2.03	4.3e-06	5.36653	8.867
GO:0045168	cell-cell signaling involved in cell fate commitment	44	10	1.05	1.3e-05	4.88606	9.52381
GO:0009786	regulation of asymmetric cell division	16	5	0.38	2.7e-05	4.56864	13.1579
GO:0010082	regulation of root meristem growth	43	7	1.03	6.5e-05	4.18709	6.79612
GO:0060468	prevention of polyspermy	5	3	0.12	0.00013	3.88606	25
GO:0010098	suspensor development	13	4	0.31	0.00019	3.72125	12.9032
GO:0008284	positive regulation of cell population proliferation	28	5	0.67	0.00048	3.31876	7.46269
GO:2000023	regulation of lateral root development	29	5	0.69	0.00056	3.25181	7.24638
GO:0045944	positive regulation of transcription by RNA polymerase II	169	12	4.03	0.00078	3.10791	2.97767
GO:2000067	regulation of root morphogenesis	33	5	0.79	0.00104	2.98297	6.32911
GO:2000014	regulation of endosperm development	10	3	0.24	0.00143	2.84466	12.5
GO:0010158	abaxial cell fate specification	13	3	0.31	0.00324	2.48945	9.67742
GO:0010078	maintenance of root meristem identity	43	5	1.03	0.00347	2.45967	4.85437
GO:0019748	secondary metabolic process	856	27	20.43	0.00414	2.383	1.32159
GO:1900366	negative regulation of defense response to insect	5	2	0.12	0.00542	2.266	16.6667

## Sheet: K27_3d_Loss
Supplementary Table 5
(H) GO Term analysis (biological function) of genes losing H3K27me3 after 3d of cold exposure
GO.ID	Term	Annotated	Significant	Expected	raw.p.value	logPvalue	FoldEnrichment
GO:1902039	negative regulation of seed dormancy process	2	1	0.01	0.0088	2.05552	100
GO:0009667	plastid inner membrane organization	2	1	0.01	0.0088	2.05552	100
